# Supplementary material for: SWATH-MS based quantitative proteomics analysis reveals novel proteins involved in PAMP triggered immunity against potato late blight pathogen Phytophthora infestans
Source: Front Plant Sci. 2022 Nov 18;13:1036637. doi: 10.3389/fpls.2022.1036637 (PMC9715588; doi:10.3389/fpls.2022.1036637)
Supplement: Supplementary file 1 [file Table_1.xlsx]

## Sheet: Sheet1
Table S1 Information of the identified 1429 DEPs in Nicotiana benthamiana-R1
Cluster	Nb101_ID	Idensity																																													Annotation
		cf-0-1-1	cf-0-1-2	cf-0-1-3	cf-0-2-1	cf-0-2-2	cf-0-2-3	cf-0-3-1	cf-0-3-2	cf-0-3-3	cf-8-1-1	cf-8-1-2	cf-8-1-3	cf-8-2-1	cf-8-2-2	cf-8-2-3	cf-8-3-1	cf-8-3-2	cf-8-3-3	cf-12-1-1	cf-12-1-2	cf-12-1-3	cf-12-2-1	cf-12-2-2	cf-12-2-3	cf-12-3-1	cf-12-3-2	cf-12-3-3	cf-24-1-1	cf-24-1-2	cf-24-1-3	cf-24-2-1	cf-24-2-2	cf-24-2-3	cf-24-3-1	cf-24-3-2	cf-24-3-3	cf-48-1-1	cf-48-1-2	cf-48-1-3	cf-48-2-1	cf-48-2-2	cf-48-2-3	cf-48-3-1	cf-48-3-2	cf-48-3-3
1	Niben101Scf00466g00012.1	2867400	2660100	2708300	2587400	2499100	2325700	2729000	2722500	2713800	2126700	2039100	1862300	2134800	1995400	2191300	2191600	2102800	2128400	1999900	1967100	1970400	2308100	2206100	2131400	2432100	2282200	2224800	2127500	2047400	1995700	1767500	1787500	1752400	1854000	1844700	2276600	1603500	1789000	1823200	1671500	1694100	1633200	1445400	1436300	1522900	AT2G21330.1 **** fructose-bisphosphate aldolase 1 LENGTH=399 IPR000741 (Fructose-bisphosphate aldolase, class-I), IPR013785 (Aldolase-type TIM barrel), IPR029768 (Fructose-bisphosphate aldolase class-I active site) GO:0003824 (catalytic activity), GO:0004332 (fructose-bisphosphate aldolase activity), GO:0006096 (glycolytic process)
1	Niben101Ctg13946g00001.1	35238000	32482000	34940000	32792000	33295000	32525000	36264000	37672000	38030000	28170000	26789000	25032000	23518000	23517000	23343000	22504000	22254000	21865000	19929000	19657000	20018000	24384000	25021000	24064000	20659000	20430000	21035000	17721000	17296000	17335000	14934000	14727000	14667000	15263000	16955000	15837000	13342000	12019000	12202000	10925000	11148000	11046000	9772500	10209000	10663000	sp|P94072|GL33_ARATH ***- Germin-like protein subfamily 3 member 3 IPR001929 (Germin) GO:0030145 (manganese ion binding), GO:0045735 (nutrient reservoir activity)
1	Niben101Scf16508g00001.1	867060	830760	824370	927580	925460	974450	919120	1032800	1002200	773810	715200	691610	854780	797580	793960	816150	783900	795270	583930	663470	661230	721110	766310	728590	638630	651630	654550	667450	666440	672230	665980	672780	661530	632470	720060	783880	636310	574440	572400	474390	516790	543000	398390	433600	494090	sp|Q5HL01|SAT_STAEQ **** Sulfate adenylyltransferase IPR002650 (Sulphate adenylyltransferase), IPR014729 (Rossmann-like alpha/beta/alpha sandwich fold), IPR015947 (PUA-like domain) GO:0000103 (sulfate assimilation), GO:0004781 (sulfate adenylyltransferase (ATP) activity)
1	Niben101Scf01448g02025.1	5566700	5708900	5615900	5654600	5568700	5638200	6419600	6434500	6389800	5209900	4990100	4892900	5025100	5006600	5119700	4484000	4508500	4369900	4383400	4344400	4280300	5741500	5818000	5579400	4715200	4611500	4634800	4622500	4592500	4684800	5168900	5036500	4981800	4741600	5236600	5071300	3835400	3563700	3645100	3568100	3589700	3616200	3144600	3106800	3361300	sp|A8F997|RL5_BACP2 ***- 50S ribosomal protein L5 IPR002132 (Ribosomal protein L5), IPR022803 (Ribosomal protein L5 domain) GO:0003735 (structural constituent of ribosome), GO:0005622 (intracellular), GO:0005840 (ribosome), GO:0006412 (translation)
1	Niben101Scf04329g06015.1	1646500	1670700	1686800	1689800	1729500	1369300	1721100	1666400	1735500	1378000	1310500	1113200	1306400	1411100	1447300	1314100	1244500	1355400	1141700	1179000	1176400	1341100	1367600	1372200	1200600	1215900	1222100	1144600	1140200	1179100	1301100	1284000	1303600	1080900	1388100	1325100	854910	1015900	977710	956490	816230	927170	928380	927590	871830	sp|P74214|SRP54_SYNY3 **** Signal recognition particle protein IPR004780 (Signal recognition particle protein Ffh), IPR027417 (P-loop containing nucleoside triphosphate hydrolase) GO:0003924 (GTPase activity), GO:0005525 (GTP binding), GO:0006614 (SRP-dependent cotranslational protein targeting to membrane), GO:0008312 (7S RNA binding), GO:0048500 (signal recognition particle)
1	Niben101Scf10305g01003.1	1554400	1549800	1503700	1866200	1902800	1934700	1965300	2022200	2009000	1094300	1040300	987380	869400	848840	916580	1288600	942730	1114300	724840	673420	696170	648540	880990	702550	606540	670070	677010	407850	424780	423920	363320	372030	400960	368270	449770	605080	287550	241960	218120	203630	143290	188190	148000	303500	187720	sp|Q118B4|ACSF_TRIEI **** Magnesium-protoporphyrin IX monomethyl ester [oxidative] cyclase IPR003251 (Rubrerythrin), IPR008434 (Magnesium-protoporphyrin IX monomethyl ester aerobic oxidative cyclase) GO:0015979 (photosynthesis), GO:0015995 (chlorophyll biosynthetic process), GO:0016491 (oxidoreductase activity), GO:0046872 (metal ion binding), GO:0048529 (magnesium-protoporphyrin IX monomethyl es…
1	Niben101Scf10366g00014.1	1020000	967220	974250	1268600	1258500	1237300	1406500	1512300	1508600	880970	867670	898400	918790	966750	1051100	866200	927940	908410	691280	683010	688390	825860	924760	838100	728250	734510	726010	550020	576960	560720	574130	560630	571440	570080	659810	637640	549400	483270	488710	388450	356070	395460	385020	525010	395850	AT5G62790.2 **** 1-deoxy-D-xylulose 5-phosphate reductoisomerase LENGTH=497 IPR003821 (1-deoxy-D-xylulose 5-phosphate reductoisomerase), IPR016040 (NAD(P)-binding domain), IPR026877 (DXP reductoisomerase C-terminal domain) GO:0005515 (protein binding), GO:0008299 (isoprenoid biosynthetic process), GO:0030604 (1-deoxy-D-xylulose-5-phosphate reductoisomerase activity), GO:0046872 (metal ion binding…
1	Niben101Scf04958g02014.1	438270	441880	429470	474660	498930	478000	537950	551600	567630	468790	453220	436210	418500	441170	420420	418360	394240	387000	340200	320070	342940	371480	371080	376080	332310	340850	314470	343020	324730	333120	298040	310850	293230	334400	417790	329400	361130	307120	316270	305550	303710	304550	277680	233220	310120	sp|Q57PU1|YDIU_SALCH ***- UPF0061 protein YdiU IPR003846 (Uncharacterised protein family UPF0061)
1	Niben101Scf01998g08005.1	92584	94187	98074	101400	102090	104440	109970	125730	98668	84770	63797	70517	100960	90067	87273	60345	80940	76968	79555	94676	89212	78940	73494	115960	90920	69000	50871	55618	34460	62772	37972	36003	81362	62336	74908	82171	69048	46288	55563	143900	48043	40271	32999	46160	36975	gb|AIE73237.1| ***- NAD-dependent epimerase/dehydratase [Synechocystis sp. PCC 6714] IPR001509 (NAD-dependent epimerase/dehydratase, N-terminal domain), IPR016040 (NAD(P)-binding domain) GO:0003824 (catalytic activity), GO:0050662 (coenzyme binding)
1	Niben101Scf11490g00008.1	628900	632370	621760	872800	908770	864440	662100	668810	629070	317210	292600	288880	459190	500960	509580	312680	302160	321410	115900	223110	216220	206680	218330	61217	221850	211100	36156	179780	172930	30885	19192	34875	19600	8482.5	36250	8240.5	16898	146990	208730	15512	12461	31934	6266.2	19748	12157	sp|P40998|THI4_SCHPO ***- Thiamine thiazole synthase IPR002922 (Thiazole biosynthetic enzyme Thi4 family)
1	Niben101Scf01283g02002.1	387590	491330	486790	439010	406690	429830	494130	555190	519560	434010	321670	379640	393160	405310	304920	428110	436950	339880	300040	387410	394710	373080	388710	378260	353380	343560	342380	287350	334100	270430	268150	278250	300440	196230	365530	258340	326890	269730	218900	207690	218690	216190	226280	245600	281560	AT4G14210.1 ***- phytoene desaturase 3 LENGTH=566 IPR014102 (Phytoene desaturase), IPR016040 (NAD(P)-binding domain) GO:0016117 (carotenoid biosynthetic process), GO:0016491 (oxidoreductase activity), GO:0016705 (oxidoreductase activity, acting on paired donors, with incorporation or reduction of molecular oxygen), GO:0055114 (oxidation-reduction process)
1	Niben101Scf02436g00004.1	200460	274250	227020	295770	233160	208930	229990	226050	250630	168140	162100	150720	197860	179230	224090	217220	149270	171590	156380	159860	140060	215660	191150	182630	139750	129530	155170	127790	132100	122680	139130	98610	120210	139970	159690	169380	110220	85071	133340	128170	114880	104050	93821	90875	110810	sp|Q39639|PLSB_CUCSA **** Glycerol-3-phosphate acyltransferase, chloroplastic IPR016222 (Glycerol-3-phosphate O-acyltransferase, chloroplast) GO:0004366 (glycerol-3-phosphate O-acyltransferase activity), GO:0006650 (glycerophospholipid metabolic process), GO:0008152 (metabolic process), GO:0016746 (transferase activity, transferring acyl groups)
1	Niben101Scf01894g02004.1	623780	729000	711210	567020	700640	604350	734870	674760	726150	547890	494140	454780	433780	444040	404450	402410	389120	336760	242340	224040	239100	278190	347020	260640	201080	203250	163160	387050	405050	429410	285620	264060	267920	235200	255720	113800	142680	216820	179570	216810	194360	231750	132380	254510	194700	sp|Q9FLG1|BXL4_ARATH ***- Beta-D-xylosidase 4 IPR002772 (Glycoside hydrolase family 3 C-terminal domain), IPR017853 (Glycoside hydrolase superfamily), IPR026891 (Fibronectin type III-like domain), IPR026892 (Glycoside hydrolase family 3) GO:0004553 (hydrolase activity, hydrolyzing O-glycosyl compounds), GO:0005975 (carbohydrate metabolic process)
1	Niben101Scf01697g19001.1	227030	211330	231170	194650	171560	228210	244180	247510	243720	129250	118620	98701	177060	220170	204190	113440	131170	123210	123760	132760	135700	156750	163500	142930	131140	128660	138460	93472	121400	79638	101520	113830	115840	85010	123220	127410	83088	98868	234750	93582	78955	65481	85368	139970	91386	sp|Q9LS88|PP250_ARATH *-*- Pentatricopeptide repeat-containing protein IPR002885 (Pentatricopeptide repeat), IPR011990 (Tetratricopeptide-like helical domain) GO:0005515 (protein binding)
1	Niben101Scf15549g00002.1	2780600	2720400	2707400	3519700	3606000	3498900	3374200	3540600	3565900	2432300	2332600	2230400	2924800	2888500	2935300	2532600	2646200	2586600	2161800	2140700	2151500	1939900	2042400	2076800	2026900	2109700	2017700	1874700	1811700	1857300	1943600	1977600	1939800	2041800	2656900	2476000	1912900	1721900	1741000	1242000	1261300	1246400	1229100	1232200	1297300	sp|Q8KCJ0|HEM2_CHLTE ***- Delta-aminolevulinic acid dehydratase IPR001731 (Porphobilinogen synthase), IPR013785 (Aldolase-type TIM barrel) GO:0003824 (catalytic activity), GO:0004655 (porphobilinogen synthase activity), GO:0033014 (tetrapyrrole biosynthetic process), GO:0046872 (metal ion binding)
1	Niben101Scf00493g00020.1	14569000	14517000	14188000	13281000	13240000	9199200	12918000	13018000	9976800	10663000	10270000	9884700	9496400	9339000	10126000	7612800	7622100	7489700	7880700	7937600	7765800	9688700	9902100	9735900	7264600	7446200	7614400	6016100	6081900	6071600	6189300	5998300	6097900	6416200	6466400	6399400	4666700	4111800	4234100	4504800	4566900	4424900	3071700	3026700	3288100	sp|P94040|GL31_ARATH ***- Germin-like protein subfamily 3 member 1 IPR001929 (Germin) GO:0030145 (manganese ion binding), GO:0045735 (nutrient reservoir activity)
1	Niben101Scf07573g00003.1	564720	587570	563590	785660	814750	678980	770250	618160	758400	439300	417800	415300	533660	515350	546400	448520	457630	470000	374130	371830	368550	381690	389050	366600	354210	360610	357340	253600	218190	230100	251900	253130	221490	208780	285610	274680	157640	160610	168530	143590	156950	171360	164760	133330	131450	ref|XP_003615152.1| **** 2-dehydro-3-deoxyphosphoheptonate aldolase (3-deoxy-d-arabino-heptulosonate 7-phosphate synthase) [Medicago truncatula] gb|AES98110.1| phospho-2-dehydro-3-deoxyheptonate aldolase [Medicago truncatula] IPR002480 (DAHP synthetase, class II) GO:0003849 (3-deoxy-7-phosphoheptulonate synthase activity), GO:0009073 (aromatic amino acid family biosynthetic process)
1	Niben101Scf05100g01013.1	685960	716450	676450	723020	730710	682560	669430	659060	725300	542090	565870	486550	611960	609230	521720	607100	610750	599400	536660	570340	497770	677330	625430	607920	484730	543930	528920	497240	453950	437440	503890	476720	401030	495840	511470	677090	422360	495890	483750	416280	403610	440890	428000	432230	505470	sp|Q5RC80|RBM39_PONAB *-** RNA-binding protein 39 IPR012677 (Nucleotide-binding alpha-beta plait domain) GO:0000166 (nucleotide binding), GO:0003676 (nucleic acid binding)
1	Niben101Scf16082g00007.1	731120	709240	669640	625330	749640	630930	989460	964970	986130	661250	608590	600670	514760	570190	534330	496880	659300	640970	536930	506150	464350	497200	651320	475310	408400	423850	507770	334560	400550	268070	326460	404580	318460	356150	460690	570580	314930	303360	370090	236760	241640	285780	215550	238830	342880	sp|Q40412|ABA2_NICPL **** Zeaxanthin epoxidase, chloroplastic IPR008984 (SMAD/FHA domain), IPR017079 (Zeaxanthin epoxidase) GO:0005515 (protein binding), GO:0008152 (metabolic process), GO:0009507 (chloroplast), GO:0009540 (zeaxanthin epoxidase [overall] activity), GO:0009688 (abscisic acid biosynthetic process), GO:0016020 (membrane), GO:0016491 (oxidoreductase activity), GO:0055114 (oxidation-r…
1	Niben101Scf04583g00008.1	1006900	989010	897280	1275400	1311800	1232600	1353800	1288100	1250700	748460	721710	668590	1057100	1003300	1012200	796870	710810	751180	627680	645430	713830	727370	749780	722450	623400	561780	557210	377760	395700	367580	215700	524130	417450	517050	241320	218050	328830	265580	260020	190620	190940	184400	116560	106160	248010	sp|Q14498|RBM39_HUMAN *-** RNA-binding protein 39 IPR012677 (Nucleotide-binding alpha-beta plait domain) GO:0000166 (nucleotide binding), GO:0003676 (nucleic acid binding)
1	Niben101Scf04539g01016.1	210900	197120	99107	141910	162340	82867	235460	141870	145380	50106	114460	81798	52226	91608	113970	109370	105770	84548	126350	135470	81397	105290	95243	116740	108950	120510	120610	103730	63158	118280	94643	124090	111720	85355	77954	163270	95094	85560	47855	64146	95573	78218	68695	135930	103370	AT4G32520.1 **** serine hydroxymethyltransferase 3 LENGTH=529 IPR001085 (Serine hydroxymethyltransferase), IPR015424 (Pyridoxal phosphate-dependent transferase) GO:0003824 (catalytic activity), GO:0004372 (glycine hydroxymethyltransferase activity), GO:0006544 (glycine metabolic process), GO:0006563 (L-serine metabolic process), GO:0030170 (pyridoxal phosphate binding)
1	Niben101Scf13206g02016.1	641340	642070	606600	615860	642160	622230	734620	808900	818940	485810	544590	549310	548540	539860	614860	474300	553760	536670	440820	457490	462370	493520	649620	485680	449770	469930	431350	377460	401240	422340	463900	432240	421230	434670	554220	543160	434990	319700	367130	311690	357800	346270	340840	436150	376740	sp|O67066|FTSY_AQUAE ***- Signal recognition particle receptor FtsY IPR004390 (Signal-recognition particle receptor FtsY), IPR027417 (P-loop containing nucleoside triphosphate hydrolase) GO:0005525 (GTP binding), GO:0006184 (GTP catabolic process), GO:0006614 (SRP-dependent cotranslational protein targeting to membrane)
1	Niben101Scf04339g04002.1	61350	34005	63368	70939	69106	70096	67757	68232	79320	51965	29138	27170	55615	39782	19632	55739	51656	43658	32468	35377	32424	39888	34660	37242	31217	34655	30487	17257	22268	21517	25545	28737	23452	22919	32546	28841	27353	23718	28619	18270	19657	20375	11962	15794	14092	sp|Q604P3|TRPB_METCA **** Tryptophan synthase beta chain IPR023026 (Tryptophan synthase beta chain/beta chain-like) GO:0000162 (tryptophan biosynthetic process), GO:0004834 (tryptophan synthase activity), GO:0006568 (tryptophan metabolic process)
1	Niben101Scf02804g00014.1	573490	576360	543730	610380	594290	589540	764910	720370	773570	516220	490540	470800	469130	491600	497890	491110	516620	488670	440910	431590	403740	506120	508160	500560	472800	456180	474990	296570	287060	526820	329170	346300	311870	509760	370450	568940	313050	274580	290100	232290	299570	220890	200970	207860	272090	sp|P74306|ZDS_SYNY3 ***- Zeta-carotene desaturase IPR002937 (Amine oxidase) GO:0016491 (oxidoreductase activity), GO:0055114 (oxidation-reduction process)
1	Niben101Scf01220g03014.1	385470	415310	409150	724560	715530	627150	689790	728960	693630	446560	449150	378730	340020	343820	457210	320050	325210	348980	207650	201690	227490	280220	327130	275590	240170	209080	241780	241640	242280	193070	217680	180030	175740	188700	222360	297360	181590	244910	325130	168700	166000	132270	176210	136510	195410	sp|Q8LB81|GDL79_ARATH ***- GDSL esterase/lipase IPR013830 (SGNH hydrolase-type esterase domain) GO:0006629 (lipid metabolic process), GO:0016788 (hydrolase activity, acting on ester bonds)
1	Niben101Scf05596g00009.1	333730	325980	367040	317760	327650	318430	394810	410770	424670	274360	277620	273860	220620	130390	264540	230170	291950	278430	222060	208430	229120	345200	397850	379760	286160	279400	288960	357420	333910	324950	347890	336180	309460	286050	342550	314710	334360	238100	230440	266020	295530	258320	139290	123990	147430	sp|Q222U2|PUR7_RHOFT **** Phosphoribosylaminoimidazole-succinocarboxamide synthase IPR013816 (ATP-grasp fold, subdomain 2), IPR028923 (SAICAR synthetase/ADE2, N-terminal) GO:0004639 (phosphoribosylaminoimidazolesuccinocarboxamide synthase activity), GO:0005524 (ATP binding), GO:0006164 (purine nucleotide biosynthetic process)
1	Niben101Scf07677g00010.1	62649	61907	60556	74446	72100	73632	81400	86120	86249	58803	56856	51771	61219	65256	71644	44217	56471	34828	49830	48036	50621	48392	45023	82327	46355	43400	49496	40811	41180	37321	44976	47598	39949	49365	57814	50394	42447	31999	38990	31629	41029	35493	32428	62932	36167	sp|C1EPQ9|SYI_BACC3 **** Isoleucine--tRNA ligase IPR002301 (Isoleucine-tRNA ligase), IPR009080 (Aminoacyl-tRNA synthetase, class 1a, anticodon-binding) GO:0000166 (nucleotide binding), GO:0002161 (aminoacyl-tRNA editing activity), GO:0003824 (catalytic activity), GO:0004812 (aminoacyl-tRNA ligase activity), GO:0004822 (isoleucine-tRNA ligase activity), GO:0005524 (ATP binding), GO:0005737 (cytopl…
1	Niben101Scf04107g00015.1	2606100	2633400	2495600	2668800	2668600	2649300	3445000	3523800	3579900	2168500	2132500	2065800	2486600	2436200	2579300	1893300	2026300	2012600	1603800	1639400	1627500	1741100	1765000	1789600	1687800	1690300	1704900	1691000	1613100	1664500	1880500	1871500	1827700	1700300	2220500	2133800	1500200	1238200	1306700	1235200	1298200	1356300	820270	783760	917970	sp|Q47LM6|RS9_THEFY ***- 30S ribosomal protein S9 IPR000754 (Ribosomal protein S9), IPR020568 (Ribosomal protein S5 domain 2-type fold) GO:0003735 (structural constituent of ribosome), GO:0005840 (ribosome), GO:0006412 (translation)
1	Niben101Scf05381g03004.1	135270	182550	136800	181550	182110	190730	174820	184200	159610	122110	126030	123320	153410	168870	135090	142540	124040	110810	129230	149330	118510	143540	116170	172480	122240	138600	152450	119010	120090	121680	136340	136110	121890	65467	175630	143780	85090	60126	46542	117940	61834	108170	146350	142200	120890	AT3G22960.1 **** Pyruvate kinase family protein LENGTH=596 IPR001697 (Pyruvate kinase) GO:0000287 (magnesium ion binding), GO:0003824 (catalytic activity), GO:0004743 (pyruvate kinase activity), GO:0006096 (glycolytic process), GO:0030955 (potassium ion binding)
1	Niben101Scf03706g02006.1	1039500	1037900	976830	1250100	1257700	1208300	1222500	1258300	1238500	963980	969200	960700	768910	739220	803630	823230	798730	787390	777690	740410	720600	825560	844960	827780	885040	831320	872090	807610	774680	817120	753260	738510	718110	748420	871030	885590	807570	685100	793900	716620	716800	728230	679110	667330	670830	sp|P83948|PME3_CITSI **** Pectinesterase 3 IPR006501 (Pectinesterase inhibitor domain), IPR011050 (Pectin lyase fold/virulence factor) GO:0004857 (enzyme inhibitor activity), GO:0005618 (cell wall), GO:0030599 (pectinesterase activity), GO:0042545 (cell wall modification)
1	Niben101Scf08564g04001.1	359160	380360	411520	276200	375010	238160	305170	342360	285570	233640	220770	259640	236400	116000	110280	255420	249560	234620	77240	229260	223380	207040	251890	200770	155000	210410	220400	144430	128830	106400	51053	133170	44094	75647	33391	120050	66760	47009	44947	72321	63858	52609	46937	40405	68257	sp|B2K065|HEM3_YERPB ***- Porphobilinogen deaminase IPR000860 (Tetrapyrrole biosynthesis, hydroxymethylbilane synthase) GO:0004418 (hydroxymethylbilane synthase activity), GO:0018160 (peptidyl-pyrromethane cofactor linkage), GO:0033014 (tetrapyrrole biosynthetic process)
1	Niben101Scf13146g00006.1	433810	422810	404840	481860	495970	483700	488170	498210	505460	344130	302980	327600	315810	368190	295090	313020	371160	352990	273780	289800	293410	298900	331170	335320	245130	253060	267400	137750	175190	168910	161820	160890	166890	187500	222750	197670	182300	158550	147090	114810	137640	148230	134050	131820	122970	sp|P48368|CRTE_CYAPA ***- Geranylgeranyl diphosphate synthase IPR017446 (Polyprenyl synthetase-related) GO:0008299 (isoprenoid biosynthetic process)
1	Niben101Scf00919g03002.1	343050	322740	306250	294680	301700	370360	324710	340800	345160	252640	244420	233090	228100	195550	210720	293930	191150	302130	218230	292540	231870	234190	224840	252810	236150	267900	263760	145690	145460	112120	214040	209990	212260	167770	340250	205220	190320	256340	240980	124420	218650	309800	158300	202140	178660	AT3G07700.3 ***- Protein kinase superfamily protein LENGTH=724 IPR011009 (Protein kinase-like domain) GO:0016772 (transferase activity, transferring phosphorus-containing groups)
1	Niben101Scf05712g02002.1	395480	401890	387330	418400	488540	467890	511980	522360	525820	255980	254780	243210	237830	247300	256770	332410	340270	342700	247500	259610	251490	228760	327010	296550	217500	262700	232860	180670	204880	226650	215370	215060	207770	224190	231490	235400	199460	141450	147730	137040	191060	169790	130290	141530	157320	sp|P94026|RBCMT_TOBAC **** Ribulose-1,5 bisphosphate carboxylase/oxygenase large subunit N-methyltransferase, chloroplastic IPR011192 (Rubisco LSMT methyltransferase, plant) GO:0005515 (protein binding), GO:0009507 (chloroplast), GO:0030785 ([ribulose-bisphosphate carboxylase]-lysine N-methyltransferase activity)
1	Niben101Scf06256g03008.1	368010	413950	401120	431900	461090	424800	428590	408430	347910	308560	287140	289010	375350	398840	332070	323230	260680	349930	320150	274860	352210	346840	336710	347110	324440	386860	376510	213540	205930	274430	311360	343160	314670	307680	273690	285530	234880	244740	325400	271610	232940	340630	261380	251400	260170	ref|WP_013413882.1| **** arsenic transporter ATPase [Methanothermus fervidus] ref|YP_004004366.1| arsenite efflux ATP-binding protein arsa [Methanothermus fervidus DSM 2088] gb|ADP77604.1| arsenite efflux ATP-binding protein ArsA [Methanothermus fervidus DSM 2088] IPR016300 (Arsenical pump ATPase, ArsA/GET3), IPR025723 (Anion-transporting ATPase-like domain), IPR027417 (P-loop containing nucleosi…
1	Niben101Scf04528g05004.1	1102900	986880	1002600	1037800	1063800	981620	866760	1052800	1059900	740550	705230	738590	978040	814560	838590	596840	750720	729070	624480	667750	906920	714470	887950	735770	636400	661330	648830	562530	388930	542040	634350	648370	547430	596250	699270	783120	585330	652720	682220	608080	589390	640730	489620	471300	392520	sp|P66066|RL13_MYCBO ***- 50S ribosomal protein L13 IPR005822 (Ribosomal protein L13), IPR023563 (Ribosomal protein L13, conserved site), IPR023564 (Ribosomal protein L13 domain) GO:0003735 (structural constituent of ribosome), GO:0005840 (ribosome), GO:0006412 (translation)
1	Niben101Scf00177g11013.1	201580	98886	196770	282080	268140	239150	277200	304170	305250	116050	89013	189020	139450	156100	161570	93130	114020	141470	131320	142530	135710	157280	137420	74049	101190	139540	130700	117370	91764	61463	68692	91464	121960	61469	181520	96584	95932	124040	90361	58509	75368	137320	90653	81322	42942	AT3G53130.1 ***- Cytochrome P450 superfamily protein LENGTH=539 IPR001128 (Cytochrome P450) GO:0005506 (iron ion binding), GO:0016705 (oxidoreductase activity, acting on paired donors, with incorporation or reduction of molecular oxygen), GO:0020037 (heme binding), GO:0055114 (oxidation-reduction process)
1	Niben101Scf01191g04002.1	314830	318200	330390	368100	357840	398530	245300	237840	321850	293080	160340	212420	217220	270950	163900	262940	249710	196250	190960	293680	216390	215750	252810	217610	216790	291690	248570	231940	280450	220260	251640	238810	203920	242390	222530	373140	206980	175120	169690	179310	181820	214390	210120	229030	183780	sp|Q9LZB2|GDL74_ARATH ***- GDSL esterase/lipase IPR013830 (SGNH hydrolase-type esterase domain) GO:0006629 (lipid metabolic process), GO:0016788 (hydrolase activity, acting on ester bonds)
1	Niben101Scf06793g03005.1	311070	283290	302010	359170	372560	404920	350720	328670	345030	265780	257000	241720	171810	168590	193430	251730	269330	238470	230470	221260	213850	202570	215520	194490	211240	217190	220070	197530	191960	192790	163130	175540	176460	188040	238120	236440	170530	176570	178990	181750	169540	168170	150910	151930	161290	AT5G21430.1 ***- Chaperone DnaJ-domain superfamily protein LENGTH=218 IPR001623 (DnaJ domain)
1	Niben101Scf04921g00004.1	217780	224250	219870	253980	251490	242640	284090	270750	264380	166800	164370	159240	206820	201510	208590	170690	173650	177250	128170	132350	129690	149540	138840	138040	128100	131730	131050	108000	103860	105450	117030	102470	117960	118040	147220	122010	95527	88559	63061	91711	95961	98080	66825	59733	84259	sp|Q9FXA2|PABP8_ARATH *-** Polyadenylate-binding protein 8 IPR012677 (Nucleotide-binding alpha-beta plait domain) GO:0000166 (nucleotide binding), GO:0003676 (nucleic acid binding)
1	Niben101Scf00167g03013.1	2267300	2274400	2207500	2159600	2294000	2195100	2702700	2795700	2817500	1692500	1599500	1544700	1670800	1658700	1698800	1416300	1434700	1447000	1492700	1571000	1588700	1574100	1584800	1528000	1427600	1528000	1497900	1453000	1304900	1391800	1348600	1518900	1492700	1203100	1742700	1804900	1361600	1195500	1209100	1344700	1345900	1347200	1073600	1036500	1069000	sp|Q5LGR6|RL27_BACFN *-*- 50S ribosomal protein L27 IPR001684 (Ribosomal protein L27) GO:0003735 (structural constituent of ribosome), GO:0005622 (intracellular), GO:0005840 (ribosome), GO:0006412 (translation)
1	Niben101Scf01191g03008.1	342590	322380	306980	369040	354670	362650	401430	371590	382890	298080	299540	271330	257200	356060	295650	311620	308780	305390	283740	279330	290250	348500	345670	337370	336440	363780	337010	308950	324610	342600	285960	299850	288910	285710	306990	303910	303350	242540	302060	206280	218640	189520	222040	213670	210490	ref|WP_008309544.1| ***- protein of unknown function (DUF1995) [Leptolyngbya sp. PCC 6406] IPR018962 (Domain of unknown function DUF1995)
1	Niben101Scf04861g01011.1	181140	181300	161670	142590	139550	136440	145830	127830	125520	49817	72734	74067	61665	50562	149530	89946	85819	90017	61897	75049	79691	190470	199390	187120	55630	164560	62102	55431	64893	146940	136520	172150	32107	56287	54449	101400	62190	81403	76592	49907	178390	202290	62522	64595	39212	sp|Q9SCV9|BGAL3_ARATH ***- Beta-galactosidase 3 IPR001944 (Glycoside hydrolase, family 35), IPR017853 (Glycoside hydrolase superfamily) GO:0004553 (hydrolase activity, hydrolyzing O-glycosyl compounds), GO:0005975 (carbohydrate metabolic process)
1	Niben101Scf04664g01003.1	2511000	2294200	2333800	2203400	2081600	2064000	2341000	2475100	2394800	1853100	1815700	1747100	1877200	1816800	1983400	1861300	1880700	1828700	1814100	1608400	1616800	2055200	2022800	1904500	2019200	1993100	1874700	1848200	1772000	1748900	1644100	1634600	1597500	1734800	1677500	1945300	1412300	1481900	1579600	1463100	1394300	1442600	1300100	1403400	1378500	AT4G38970.1 **** fructose-bisphosphate aldolase 2 LENGTH=398 IPR000741 (Fructose-bisphosphate aldolase, class-I), IPR013785 (Aldolase-type TIM barrel), IPR029768 (Fructose-bisphosphate aldolase class-I active site) GO:0003824 (catalytic activity), GO:0004332 (fructose-bisphosphate aldolase activity), GO:0006096 (glycolytic process)
1	Niben101Scf05732g03012.1	349190	329160	387510	367700	381000	376370	466780	384910	405650	232180	299120	246250	244930	232770	275080	223410	240020	338900	243700	203500	194280	236680	246310	273940	228070	220620	233360	247880	240120	208030	252000	245970	270670	206460	276450	251130	252890	192300	201250	206490	187100	191920	165540	96791	308850	AT5G24690.1 ***- Protein of unknown function (DUF3411) LENGTH=521 IPR021825 (Protein of unknown function DUF3411, plant)
1	Niben101Scf00929g03016.1	60569	76068	52869	59640	70846	72415	68305	82769	90636	38478	42598	30361	50790	47256	72674	46295	40942	11894	82472	31170	36408	35452	55972	62969	66174	66177	67838	51858	29870	48720	42177	25721	43585	51180	50206	73435	28067	17080	31135	16547	34929	25580	66593	76280	79338	sp|P48368|CRTE_CYAPA ***- Geranylgeranyl diphosphate synthase IPR017446 (Polyprenyl synthetase-related) GO:0008299 (isoprenoid biosynthetic process)
1	Niben101Scf01585g01017.1	83045	80515	75735	95044	97416	92356	74174	61927	87903	65566	53457	63701	63156	59273	73941	56709	63839	50699	54645	44364	16598	41482	59283	10809	44732	32555	62964	49113	57035	47545	65990	46585	51705	59977	74078	38575	59842	38157	47582	56966	46806	44002	12987	19081	10626	sp|Q9LHP1|RL74_ARATH ***- 60S ribosomal protein L7-4 IPR005998 (Ribosomal protein L7, eukaryotic)
1	Niben101Scf00271g07003.1	99435	93179	97094	110810	105080	110500	77289	94078	98916	89507	85445	45792	66700	65724	80565	85904	82130	85131	86519	71932	62814	66984	99112	61381	80245	85643	88957	79153	60642	47320	88799	63039	69399	55804	87354	73406	65153	43793	70496	66661	53138	58186	53380	65098	96042	sp|B6JE08|RPIA_OLICO **** Ribose-5-phosphate isomerase A IPR004788 (Ribose 5-phosphate isomerase, type A) GO:0004751 (ribose-5-phosphate isomerase activity), GO:0009052 (pentose-phosphate shunt, non-oxidative branch)
1	Niben101Scf01822g13004.1	181600	218840	218960	263340	267950	273250	333770	306850	267550	184350	217500	171560	172110	167390	196720	229600	236010	231890	227420	210400	205240	228960	245680	193400	143490	210360	175530	164250	143230	155640	122900	169860	127060	135820	191210	221300	233540	177140	188470	153250	155000	140310	176480	138280	163830	sp|Q39639|PLSB_CUCSA **** Glycerol-3-phosphate acyltransferase, chloroplastic IPR016222 (Glycerol-3-phosphate O-acyltransferase, chloroplast) GO:0004366 (glycerol-3-phosphate O-acyltransferase activity), GO:0006650 (glycerophospholipid metabolic process), GO:0008152 (metabolic process), GO:0016746 (transferase activity, transferring acyl groups)
1	Niben101Scf07741g02033.1	239340	304030	303610	333510	334260	380240	406450	274750	310530	180430	210850	218590	274420	249570	272340	250210	254930	248170	208370	169620	173590	188250	263220	189260	202620	166610	166830	76450	146180	134330	73327	118410	125740	136290	91804	120650	90270	101100	104970	127090	105720	49589	67824	79483	132170	sp|Q9LU39|GLUBP_ARATH **** Glutamyl-tRNA reductase-binding protein, chloroplastic IPR012349 (FMN-binding split barrel) GO:0010181 (FMN binding), GO:0016491 (oxidoreductase activity), GO:0055114 (oxidation-reduction process)
1	Niben101Scf17973g00015.1	493020	560030	496150	511190	528130	482620	457450	498340	500310	331670	354890	342250	340890	364760	325450	346490	352860	357970	397650	376110	389640	410170	419640	381670	364150	346430	356800	328800	291880	287520	340850	348940	322890	317920	335040	425080	222430	252510	266730	245290	204930	244690	215730	187060	216960	sp|Q8DJN4|RS20_THEEB --*- 30S ribosomal protein S20 IPR002583 (Ribosomal protein S20) GO:0003723 (RNA binding), GO:0003735 (structural constituent of ribosome), GO:0005622 (intracellular), GO:0005840 (ribosome), GO:0006412 (translation)
1	Niben101Scf03161g00007.1	121930	70906	116840	111650	97435	106800	109800	123660	144760	88660	82887	100380	39611	81705	99521	82567	86709	51677	97322	112760	96799	48283	110260	49684	58756	121590	82103	58005	93186	132830	72395	76528	83112	75305	72024	82174	60487	61035	54839	30622	86393	75811	22942	75662	73334	sp|Q5F3K0|TTC27_CHICK --*- Tetratricopeptide repeat protein 27 IPR011990 (Tetratricopeptide-like helical domain) GO:0005515 (protein binding)
1	Niben101Ctg15519g00001.1	139060	115200	122140	152560	104100	125120	115570	129190	117020	55352	77114	63471	90465	77522	93595	88885	64344	73272	147450	148660	102940	80986	48252	76344	93974	131130	133530	56577	81681	77026	116430	54179	97422	46894	54327	43434	140780	71947	96553	117230	63696	46922	83533	53219	88972	ref|XP_010111583.1| *-** 30S rib S21 [Morus notabilis] IPR001911 (Ribosomal protein S21) GO:0003735 (structural constituent of ribosome), GO:0005840 (ribosome), GO:0006412 (translation)
1	Niben101Scf02156g00008.1	138980	151930	142330	143830	147600	154660	155190	143120	153660	118990	157730	163380	87781	101050	88716	108270	122590	96691	84906	78187	83512	99117	100300	97887	60263	86368	97064	64701	73206	116260	76441	70736	63026	76441	71093	51510	71347	40219	99653	56656	54408	91306	59980	85869	72321	sp|Q9FSB8|CHS2_RUTGR *-*- Chalcone synthase 2 IPR012392 (Very-long-chain 3-ketoacyl-CoA synthase), IPR016039 (Thiolase-like) GO:0003824 (catalytic activity), GO:0006633 (fatty acid biosynthetic process), GO:0008152 (metabolic process), GO:0008610 (lipid biosynthetic process), GO:0016020 (membrane), GO:0016747 (transferase activity, transferring acyl groups other than amino-acyl groups)
1	Niben101Scf02299g01011.1	269560	264790	259030	226840	254120	242970	157200	114150	93159	111940	101970	104370	162960	154070	83879	127110	174440	124040	127310	101120	74803	71477	119530	46757	116310	91423	104070	109410	97631	105340	101050	46365	29934	18086	78508	70694	85036	66585	76912	82861	76131	91908	67983	22852	102200	AT1G30360.1 ***- Early-responsive to dehydration stress protein (ERD4) LENGTH=724 IPR003864 (Domain of unknown function DUF221), IPR027815 (Domain of unknown function DUF4463) GO:0016020 (membrane)
1	Niben101Scf01054g03001.1	387040	390630	393690	448250	499240	465260	491130	538330	487040	325030	319460	309350	227560	211320	217490	314990	302930	294580	311110	300520	234300	292470	403460	308860	355330	315670	287970	267360	240300	289300	210830	203950	218530	255330	237840	298360	210960	246110	212210	153180	221910	221520	160910	151620	202800	ref|XP_007023201.1| ***- Post-illumination chlorophyll fluorescence increase isoform 1 [Theobroma cacao] gb|EOY25823.1| Post-illumination chlorophyll fluorescence increase isoform 1 [Theobroma cacao]
1	Niben101Scf02752g12002.1	148800	161690	170150	184300	179930	179840	200480	208130	206680	159070	145870	147780	138960	136070	142450	155290	164930	160530	110620	123770	117340	110460	120450	121200	114200	120950	117810	117170	110930	107520	110810	121850	113430	104910	137450	129640	116230	96643	103140	84216	89391	98051	95641	92013	94207	sp|Q4R0H9|PILR1_LINUS -**- Bifunctional pinoresinol-lariciresinol reductase 1 IPR016040 (NAD(P)-binding domain)
1	Niben101Scf04398g01005.1	40504	35475	29927	31898	41340	35732	40445	25010	39784	28737	28025	28557	28525	23415	25257	29494	31715	29517	18682	22405	25722	29927	27029	26928	23775	22956	24697	20745	21044	20581	3480.8	19030	21083	8684.7	28365	8174.7	12550	27378	23436	1383.2	22521	21327	18099	28249	27320	AT1G32160.1 ***- Protein of unknown function (DUF760) LENGTH=406 IPR008479 (Protein of unknown function DUF760)
1	Niben101Scf02803g00007.1	125720	118020	121370	108110	109320	99517	126330	127820	123320	93159	83681	83162	74400	83461	74286	100180	87979	88015	75531	78551	79642	99682	111500	106040	103130	101960	93647	89177	95627	87551	85931	95961	89444	91863	86876	119050	85817	92256	100730	73341	74270	59994	70208	69949	75843	sp|Q465F3|TRPD_METBF **** Anthranilate phosphoribosyltransferase IPR005940 (Anthranilate phosphoribosyl transferase) GO:0000162 (tryptophan biosynthetic process), GO:0004048 (anthranilate phosphoribosyltransferase activity), GO:0008152 (metabolic process), GO:0016757 (transferase activity, transferring glycosyl groups)
1	Niben101Scf01774g10020.1	49529	56044	51798	52836	63651	63692	56257	52172	56971	32690	1225.4	27114	22460	22241	3206.5	30374	34617	32923	25161	26145	27229	19542	22159	19795	20453	27178	27575	18418	17420	18461	19035	20072	18185	20466	28822	23608	12054	10223	9723.9	7588.2	2601.6	4783.5	8020.4	6793.5	7237.6	ref|WP_032378363.1| *-*- membrane protein [Rhodococcus fascians] IPR021414 (Protein of unknown function DUF3054)
1	Niben101Scf07103g03016.1	88152	91430	56618	89974	82281	47334	84498	88068	74448	78982	53450	31093	52445	30177	26722	75942	63086	60667	36775	65074	69286	68683	52074	85850	94066	59125	45086	50266	37215	51116	50945	32379	51361	49867	49132	61113	28377	33159	27461	45020	56949	23785	39297	19667	12483	AT2G15620.1 **** nitrite reductase 1 LENGTH=586 IPR005117 (Nitrite/Sulfite reductase ferredoxin-like domain), IPR006067 (Nitrite/sulphite reductase 4Fe-4S domain) GO:0016491 (oxidoreductase activity), GO:0020037 (heme binding), GO:0051536 (iron-sulfur cluster binding), GO:0055114 (oxidation-reduction process)
1	Niben101Scf14374g00001.1	184980	183740	173170	191290	204090	191520	184720	187590	182470	91955	144780	111860	172330	153730	162870	171430	166310	172590	134330	154650	122870	171420	184430	170520	132950	126970	100990	124710	123490	125640	114220	130730	130830	137090	124810	139340	119900	107150	95010	117370	116030	108580	106190	125200	104550	sp|B9E9K7|RL18_MACCJ ***- 50S ribosomal protein L18 IPR005484 (Ribosomal protein L18/L5) GO:0003735 (structural constituent of ribosome), GO:0005622 (intracellular), GO:0005840 (ribosome), GO:0006412 (translation)
1	Niben101Scf04763g01015.1	78234	74127	77570	93695	88707	83999	80856	86632	94407	69439	59495	69552	70710	61764	70780	72503	74976	66823	65894	65429	61677	62884	67305	60725	55017	58445	57367	44753	42364	44760	52127	47962	46646	49806	61112	15187	47624	50549	12134	50974	46323	41307	46494	46208	48088	AT3G29185.2 ***- Domain of unknown function (DUF3598) LENGTH=411 IPR011038 (Calycin-like), IPR022017 (Domain of unknown function DUF3598)
1	Niben101Scf02312g04002.1	27737	34442	25715	34664	21632	27478	25644	25184	29097	6430.3	21303	9383.9	16529	21459	24501	23383	18865	22114	23910	24684	25000	19009	19356	21630	16776	21091	18273	9300.9	21265	8414.1	9822.7	20970	16312	18065	13977	19042	18461	19680	23408	17797	6581.3	9624.9	18609	8945.9	15753	sp|Q6FF50|RLMB_ACIAD *-** 23S rRNA (guanosine-2'-O-)-methyltransferase RlmB IPR029028 (Alpha/beta knot methyltransferases), IPR029064 (50S ribosomal protein L30e-like) GO:0003723 (RNA binding), GO:0006396 (RNA processing), GO:0008168 (methyltransferase activity), GO:0008173 (RNA methyltransferase activity)
1	Niben101Scf06091g04018.1	108630	117270	99226	105840	114050	104330	122230	116110	127250	115340	57527	99544	86274	90272	101300	102080	98925	94662	81581	73670	75010	40189	112040	100790	97848	94932	104850	104670	86090	114240	40333	17181	103700	95633	106870	113530	86922	56324	66917	81679	54869	78813	71234	72447	44411	ref|WP_009782089.1| ***- glycosyltransferase [Lyngbya sp. PCC 8106] gb|EAW39129.1| Glycosyl transferase, family 9 [Lyngbya sp. PCC 8106]
1	Niben101Scf09075g03002.1	161790	151430	144800	197980	186940	189340	202150	212190	203940	130750	132630	110210	112060	102800	109770	106860	97569	107370	77002	80066	90278	93944	92994	87741	86760	85089	84718	72711	74273	69242	54517	54963	52489	58384	76968	76697	38554	55689	51956	32097	31276	34677	40362	42943	52944	AT5G65730.1 **** xyloglucan endotransglucosylase/hydrolase 6 LENGTH=292 IPR013320 (Concanavalin A-like lectin/glucanase domain), IPR016455 (Xyloglucan endotransglucosylase/hydrolase) GO:0004553 (hydrolase activity, hydrolyzing O-glycosyl compounds), GO:0005618 (cell wall), GO:0005975 (carbohydrate metabolic process), GO:0006073 (cellular glucan metabolic process), GO:0016762 (xyloglucan:xylogluco…
1	Niben101Scf10036g01003.1	177720	174250	166440	192930	199770	208900	233630	221950	207360	153220	154690	143840	151320	149330	140460	150160	144210	138890	135620	131460	136200	157900	163840	170810	132580	141130	132830	135060	120620	132170	108250	119280	117060	121260	139330	139650	139510	124020	138160	108100	101050	102940	94817	90086	104460	sp|Q5PAR3|NUOD_ANAMM *-** NADH-quinone oxidoreductase subunit D IPR029014 (NiFe hydrogenase-like) GO:0016651 (oxidoreductase activity, acting on NAD(P)H), GO:0048038 (quinone binding), GO:0051287 (NAD binding), GO:0055114 (oxidation-reduction process)
1	Niben101Scf01338g00002.1	14507	11969	13340	12352	11267	8865.1	7997.4	6463.7	7086.8	7167.3	7597.5	5797.1	7284.4	7500.1	6890	4733.2	4093.7	5555.4	4678.1	13337	7602.4	1937.2	4370.1	5369.7	8423.9	3282.7	3499.9	3160.7	881.75	3597.4	3894.3	2182.5	3785.9	13041	5041.3	1995.1	3544.4	3041	4117.6	5219.5	5639.7	3944.9	4442.5	3031.4	3611.8	AT3G25700.1 ***- Eukaryotic aspartyl protease family protein LENGTH=452 IPR001461 (Aspartic peptidase), IPR021109 (Aspartic peptidase domain) GO:0004190 (aspartic-type endopeptidase activity), GO:0006508 (proteolysis)
1	Niben101Scf07006g00006.1	21719	29390	25297	20438	21842	23814	24990	26583	36064	17219	24048	8044.2	21520	19199	22972	10183	18082	23278	21494	5624.9	17765	30502	25566	27340	10070	25879	14267	2058.9	22858	21495	13898	16151	16106	16573	9505.3	19397	13868	12556	10094	18709	6195	20272	4253.6	12032	11494	AT3G06730.1 ***- Thioredoxin z LENGTH=183 IPR005746 (Thioredoxin), IPR012336 (Thioredoxin-like fold) GO:0006662 (glycerol ether metabolic process), GO:0015035 (protein disulfide oxidoreductase activity), GO:0045454 (cell redox homeostasis)
1	Niben101Scf00067g02002.1	60448	60033	53602	72034	72401	70326	64556	69350	64944	43766	46879	41427	57820	58211	51423	48350	45263	46222	40162	40435	40827	40773	46731	48440	36715	34218	32953	37788	33466	21627	36698	30442	11685	31279	38600	46459	43890	37413	37818	29433	30603	10617	24548	29027	27064	AT3G53580.1 **** diaminopimelate epimerase family protein LENGTH=362 IPR001653 (Diaminopimelate epimerase, DapF) GO:0005737 (cytoplasm), GO:0008837 (diaminopimelate epimerase activity), GO:0009089 (lysine biosynthetic process via diaminopimelate)
1	Niben101Scf04252g01009.1	56249	56682	50651	65625	66201	69574	66066	71283	71875	33064	34107	33170	48787	45131	50800	33958	35196	39761	26990	28786	31232	28184	34883	38986	26557	28372	29254	23275	23264	17894	22971	25547	25931	26549	30911	31600	31009	26772	27483	25147	30608	6210.8	22102	24075	18291	sp|Q8YHC2|SSB_BRUME *-** Single-stranded DNA-binding protein IPR000424 (Primosome PriB/single-strand DNA-binding) GO:0003697 (single-stranded DNA binding), GO:0006260 (DNA replication)
1	Niben101Scf01785g05002.1	33725	25651	16824	34032	28267	23192	32621	28423	29804	27086	14501	21470	17573	16873	16302	23692	20734	24456	18045	25310	20253	28556	27398	22211	26994	19959	21476	16665	23773	19359	25442	22753	26619	20116	12569	16156	16334	15172	14819	8664.2	13660	23973	16709	15590	6406.2	gb|KEH31356.1| **** S-adenosyl-L-methionine-dependent methyltransferase [Medicago truncatula] IPR004159 (Putative S-adenosyl-L-methionine-dependent methyltransferase), IPR029063 (S-adenosyl-L-methionine-dependent methyltransferase) GO:0008168 (methyltransferase activity)
1	Niben101Scf11778g01014.1	30069	67469	54992	42115	47396	27966	60637	61769	54049	29472	36085	39760	15776	17909	60309	19453	9024.6	20882	29853	16103	27518	21034	34332	41978	39554	35242	29253	24970	23191	93755	14635	22223	20620	22137	63196	21580	16438	22020	29767	21290	15663	24302	6103.6	18259	12680	ref|WP_008205648.1| **** protein tyr -tyrosine-phosphatase [Microcystis sp. T1-4] IPR017867 (Protein-tyrosine phosphatase, low molecular weight), IPR023485 (Phosphotyrosine protein phosphatase I superfamily) GO:0004725 (protein tyrosine phosphatase activity), GO:0006470 (protein dephosphorylation)
1	Niben101Scf01718g01010.1	269840	253680	234730	274750	301510	288010	276750	318280	295380	226970	210230	174540	134950	124350	131640	209350	209380	212810	167660	166050	166700	173850	173790	170910	153300	158880	157280	177790	148480	171600	160160	161070	159160	175710	215430	203420	142590	110990	120350	124860	127660	126610	99223	120990	125320	AT2G37180.1 ***- Aquaporin-like superfamily protein LENGTH=285 IPR000425 (Major intrinsic protein), IPR023271 (Aquaporin-like) GO:0005215 (transporter activity), GO:0006810 (transport), GO:0016020 (membrane)
1	Niben101Scf03079g00002.1	23681	27819	26192	18304	24150	22293	27243	17254	17670	13855	14906	9660.5	2506.8	3915.2	16010	7591.1	13100	8175.9	11117	7418.7	17988	16743	13118	14895	12398	19880	10832	11591	14009	13626	4615.5	4435.4	9260.9	9786.2	17945	11806	4099.2	4667.7	2117.9	2483.1	9124.7	8913	3245.2	5016.8	10398	AT2G39190.2 **** Protein kinase superfamily protein LENGTH=814 IPR011009 (Protein kinase-like domain) GO:0004672 (protein kinase activity), GO:0005524 (ATP binding), GO:0006468 (protein phosphorylation), GO:0016772 (transferase activity, transferring phosphorus-containing groups)
1	Niben101Scf01710g01015.1	102700	91668	102570	120140	132170	119520	115050	120490	128030	87048	87528	77261	78966	79942	83540	94104	86912	91221	80559	87422	82481	86910	77168	82469	81226	75848	73070	74494	65944	76192	71251	74829	73371	76938	93902	76877	86211	64326	65327	59740	59756	53274	59985	60302	64002	AT3G58610.1 **** ketol-acid reductoisomerase LENGTH=591 IPR013023 (Acetohydroxy acid isomeroreductase), IPR016040 (NAD(P)-binding domain) GO:0004455 (ketol-acid reductoisomerase activity), GO:0008652 (cellular amino acid biosynthetic process), GO:0009082 (branched-chain amino acid biosynthetic process), GO:0016491 (oxidoreductase activity), GO:0016616 (oxidoreductase activity, acting on the CH-OH…
1	Niben101Scf11724g01006.1	416550	390100	405740	688320	681710	652130	491610	496550	496790	292950	262960	267310	473740	459070	470460	293130	280090	290150	238200	211830	229330	149170	137880	149170	290620	241620	260010	120210	100820	100320	59998	60535	69578	82334	93444	91756	64950	49137	16234	39983	31306	43977	11321	49798	44438	sp|P40998|THI4_SCHPO **** Thiamine thiazole synthase IPR002922 (Thiazole biosynthetic enzyme Thi4 family) GO:0006950 (response to stress), GO:0009228 (thiamine biosynthetic process)
1	Niben101Scf23355g00024.1	139200	338510	330510	285110	260970	120190	242070	89887	237570	166290	76049	61298	95986	101400	114810	202180	208040	76852	84282	201190	88647	283470	282670	114680	87003	236910	233850	161100	168730	188520	178490	168710	181600	164770	67430	167550	145850	107760	104810	95421	100390	59644	104780	105330	96219	sp|Q9NW13|RBM28_HUMAN *-** RNA-binding protein 28 IPR012677 (Nucleotide-binding alpha-beta plait domain) GO:0000166 (nucleotide binding), GO:0003676 (nucleic acid binding)
1	Niben101Scf02952g02005.1	204870	195690	190490	175100	178490	165510	192710	183970	193170	113020	97835	98355	135750	131920	130740	122230	119320	123890	100300	112710	103360	90717	93310	87615	118770	112960	102600	78686	83071	78672	97804	96211	99913	97731	108680	115970	64567	67258	64541	46454	46787	45305	35976	35507	43249	AT5G04740.1 ***- ACT domain-containing protein LENGTH=301
1	Niben101Scf03070g04003.1	118130	107850	91139	114820	106000	104920	140720	132860	143460	94369	96353	86902	72456	75178	78839	96878	88213	96228	70402	75350	88937	75083	78396	79014	109570	95498	104170	85078	88907	96870	102040	93430	95314	96276	96435	107820	75500	77706	86273	83783	85727	78654	70240	61273	70449	sp|Q09WW2|NDHH_MORIN --*- NAD(P)H-quinone oxidoreductase subunit H, chloroplastic
1	Niben101Scf02289g10020.1	166630	167960	189830	312300	231990	333400	223890	230270	240360	164620	266310	147460	168500	153080	168540	211750	150570	165820	147930	154290	260130	147830	200350	173820	161180	165460	154150	130180	124810	133050	251830	136990	118480	113690	172500	151410	193480	133880	125300	202640	117720	139040	118080	122730	136920	sp|P34114|PHS2_DICDI *-** Glycogen phosphorylase 2 IPR000811 (Glycosyl transferase, family 35) GO:0005975 (carbohydrate metabolic process), GO:0008184 (glycogen phosphorylase activity)
1	Niben101Scf04225g02007.1	182320	205540	171980	250370	261580	384110	210240	327120	282890	166540	166640	153890	196680	144750	167060	293930	184620	244700	348940	240890	185140	274690	278910	145830	212580	302610	348760	117960	156920	250400	200320	142160	154600	171500	156490	162780	126480	127270	181640	220180	152060	151450	203320	124220	119490	sp|A4XL70|IF2_CALS8 **** Translation initiation factor IF-2 IPR005225 (Small GTP-binding protein domain), IPR009000 (Translation protein, beta-barrel domain), IPR015760 (Translation initiation factor IF- 2), IPR023115 (Translation initiation factor IF- 2, domain 3), IPR027417 (P-loop containing nucleoside triphosphate hydrolase) GO:0003743 (translation initiation factor activity), GO:0003924 (GTP…
1	Niben101Ctg16053g00004.1	114540	148740	166400	203600	253470	251250	256970	148430	140770	163240	174840	190820	156210	131940	74646	65605	161380	101500	190910	99288	172570	168060	81399	183660	100400	79043	122410	65168	103480	92700	153830	87435	151180	43643	138280	277360	89822	146750	109200	95984	105920	141360	151440	69972	123410	sp|Q67QB5|SAT_SYMTH **** Sulfate adenylyltransferase IPR002650 (Sulphate adenylyltransferase), IPR014729 (Rossmann-like alpha/beta/alpha sandwich fold), IPR015947 (PUA-like domain) GO:0000103 (sulfate assimilation), GO:0004781 (sulfate adenylyltransferase (ATP) activity)
1	Niben101Scf02937g00003.1	281430	233300	244200	277480	287220	271230	215970	348370	266400	222880	203310	207380	220380	249990	223090	240430	246360	235020	154900	167110	163960	192580	168320	192040	234630	204440	204570	193150	161480	144460	192550	158380	125510	150310	280490	283780	112440	137670	98850	151680	155410	170190	142830	162130	190720	sp|Q9STV0|GWD2_ARATH ***- Alpha-glucan water dikinase 2 IPR002192 (Pyruvate phosphate dikinase, PEP/pyruvate-binding), IPR013816 (ATP-grasp fold, subdomain 2) GO:0003824 (catalytic activity), GO:0005524 (ATP binding), GO:0016301 (kinase activity), GO:0016310 (phosphorylation)
1	Niben101Scf02030g01002.1	291860	170360	194840	215630	208040	242580	185830	250650	259850	184220	160030	148850	226170	208740	218250	183720	184260	197680	167960	215670	179600	129330	166920	141120	255580	174080	180400	100820	143620	127700	174180	137530	118110	148470	180520	191790	146580	129070	131640	158040	115080	205530	114590	141390	140700	sp|Q9M7J4|MFP1_TOBAC ***- MAR-binding filament-like protein 1-1
1	Niben101Scf01735g00005.1	474460	441510	369880	286520	306040	374960	598580	563450	462350	378510	355520	338310	226480	393490	79679	366760	272170	376800	269630	71774	340780	88900	324980	187070	191310	94329	101470	319990	324730	274860	183230	164310	191010	203320	134540	119900	75076	96590	135130	203960	179250	89003	146290	188700	67176	AT1G37130.1 **** nitrate reductase 2 LENGTH=917 IPR001433 (Oxidoreductase FAD/NAD(P)-binding), IPR001834 (NADH:cytochrome b5 reductase (CBR)), IPR008335 (Eukaryotic molybdopterin oxidoreductase), IPR014756 (Immunoglobulin E-set), IPR017938 (Riboflavin synthase-like beta-barrel) GO:0009055 (electron carrier activity), GO:0016491 (oxidoreductase activity), GO:0030151 (molybdenum ion binding), GO:00…
1	Niben101Scf07325g00004.1	225530	256890	240510	241220	179780	204620	142030	151800	160420	152900	162990	152760	180780	168810	188010	156400	121440	125880	129960	135700	142180	186040	188850	154030	134040	153010	144190	133640	115100	144360	176510	171550	165710	169170	153630	145460	150240	133870	129720	106890	94885	115790	98117	115130	118470	sp|Q9FNP8|RS193_ARATH ***- 40S ribosomal protein S19-3 IPR001266 (Ribosomal protein S19e) GO:0003735 (structural constituent of ribosome), GO:0005622 (intracellular), GO:0005840 (ribosome), GO:0006412 (translation)
1	Niben101Scf01338g03019.1	370490	543460	507270	335750	503870	448760	673500	537150	670820	524020	251120	243940	490840	500280	522670	320560	292500	267410	161620	441660	541980	290670	306400	321090	148160	236610	194700	271090	257210	143860	208610	280140	231040	223450	360030	490310	219510	178500	289250	291060	477960	273080	234150	179860	195280	AT3G25690.1 *-*- Hydroxyproline-rich glycoprotein family protein LENGTH=1004
1	Niben101Scf06976g06016.1	22805	27018	22628	20192	18295	27625	34480	27144	31771	18832	20588	18040	21841	24584	22599	21433	6728.1	21933	2418.3	20607	3903.4	17354	4087.7	23475	22442	18153	19371	20931	19184	20348	21528	19331	21906	21278	4341.7	14365	19624	3702.3	9344.5	17544	20684	20159	5611.6	5627.5	3573.5	ref|WP_009782089.1| ***- glycosyltransferase [Lyngbya sp. PCC 8106] gb|EAW39129.1| Glycosyl transferase, family 9 [Lyngbya sp. PCC 8106]
1	Niben101Scf01718g07005.1	23170	25624	4598.8	39712	28610	30284	34974	39357	38018	20707	23454	23192	4037.8	19223	21220	17835	4524.8	16694	27847	23457	23843	25753	31961	27134	27066	21345	26150	24076	22825	24429	23292	27308	25667	21775	32490	33417	19238	21079	4531.7	3604.6	13770	4170.1	14462	15661	17951	AT1G20330.1 **** sterol methyltransferase 2 LENGTH=361 IPR013705 (Sterol methyltransferase C-terminal), IPR029063 (S-adenosyl-L-methionine-dependent methyltransferase) GO:0006694 (steroid biosynthetic process), GO:0008152 (metabolic process), GO:0008168 (methyltransferase activity)
1	Niben101Scf23159g00004.1	165680	178470	176250	176580	197240	208740	229830	103150	198750	173470	158490	151170	116630	143680	147080	113090	148150	36275	118580	118070	111210	155380	159190	196330	137830	133020	157120	156170	161480	134740	134080	155490	172910	176410	167050	165980	136150	119810	125910	115460	158260	109720	81524	85729	119090	sp|Q2YTH9|SYL_STAAB **** Leucine--tRNA ligase IPR009080 (Aminoacyl-tRNA synthetase, class 1a, anticodon-binding), IPR015413 (Methionyl/Leucyl tRNA synthetase) GO:0000166 (nucleotide binding), GO:0002161 (aminoacyl-tRNA editing activity), GO:0004812 (aminoacyl-tRNA ligase activity), GO:0004823 (leucine-tRNA ligase activity), GO:0005524 (ATP binding), GO:0006418 (tRNA aminoacylation for protein tra…
1	Niben101Scf01513g00010.1	135490	66864	128490	140180	143690	136060	137000	146560	154190	117910	47541	9796.6	128970	109140	130510	113750	108470	113360	108480	117490	106450	127590	132920	125710	118930	9128.8	116480	86780	100920	95724	83318	90787	12887	95163	82885	35829	72899	61231	59553	68600	67204	14863	51745	61604	66258	ref|WP_009632881.1| --*- Protein of unknown function (DUF2996) [Synechocystis sp. PCC 7509] IPR021374 (Protein of unknown function DUF2996)
1	Niben101Scf34386g00010.1	373720	461440	361120	418970	450100	452070	407750	415430	395550	340100	294420	384020	162500	202080	322350	334600	404750	414470	469450	336520	345100	349100	341280	332990	319430	313740	326390	312690	305590	296740	296510	277860	273450	303890	411180	346100	238310	224930	221390	203280	210890	221690	264850	257020	265700	AT2G37180.1 ***- Aquaporin-like superfamily protein LENGTH=285 IPR000425 (Major intrinsic protein), IPR023271 (Aquaporin-like) GO:0005215 (transporter activity), GO:0006810 (transport), GO:0016020 (membrane)
1	Niben101Scf02435g01007.1	83248	101880	71634	73358	64291	70003	79066	16775	72513	50780	51136	45578	6343.7	59533	66876	55520	53057	43589	55961	56231	53294	107390	84417	85392	69231	61093	48114	38840	37845	37718	49187	10951	46917	62119	47582	59153	40690	36267	38353	24422	33184	30827	34132	23810	37407	ref|WP_008319174.1| ***- Protein of unknown function (DUF1092) [Leptolyngbya sp. PCC 6406] IPR009472 (Protein of unknown function DUF1092)
1	Niben101Scf14799g02001.1	36018	94085	53413	54227	80511	42689	78946	97251	94855	26289	59469	9375.7	34061	32309	38018	74843	74136	61733	30079	32092	29488	88494	84964	31462	40754	35970	97846	28542	25329	36590	38722	41491	16326	33547	93391	33766	27630	30681	44301	31122	24119	40461	32526	15843	24601	sp|P34114|PHS2_DICDI *-** Glycogen phosphorylase 2 IPR000811 (Glycosyl transferase, family 35) GO:0005975 (carbohydrate metabolic process), GO:0008184 (glycogen phosphorylase activity)
1	Niben101Scf04103g04014.1	38029	25510	53893	58712	52201	51877	50645	53009	57593	35994	43739	35234	30747	50407	50295	29902	32887	24232	4362.5	5871.7	47214	57027	68987	14662	57860	46522	49876	20473	22896	17178	7685.1	12814	18826	14565	61484	29283	71568	66040	37210	19155	19723	16339	14758	21234	19533	sp|Q7PP77|EIF3I_ANOGA ***- Eukaryotic translation initiation factor 3 subunit I IPR015943 (WD40/YVTN repeat-like-containing domain) GO:0005515 (protein binding)
1	Niben101Scf01905g00009.1	662850	708160	676400	584370	652140	651170	236990	602050	847110	569960	533380	558350	522210	572950	597280	548610	216310	585650	423830	425930	431590	498180	544490	510930	445090	252650	510080	505870	464620	444890	539410	464150	459060	450730	615710	359230	155970	158450	251730	555240	553180	433260	231380	434220	508620	AT5G35170.1 **** adenylate kinase family protein LENGTH=588 IPR000850 (Adenylate kinase/UMP-CMP kinase), IPR018962 (Domain of unknown function DUF1995), IPR027417 (P-loop containing nucleoside triphosphate hydrolase) GO:0004017 (adenylate kinase activity), GO:0005524 (ATP binding), GO:0006139 (nucleobase-containing compound metabolic process), GO:0016776 (phosphotransferase activity, phosphate gr…
1	Niben101Scf00437g00015.1	191000	212600	104430	142460	250530	156120	264280	132130	121910	141480	129670	149560	91332	154250	206810	102210	142360	102940	181140	168520	159770	174160	135480	64218	188100	185150	83867	137770	148520	74538	78108	151440	137130	160270	102610	195170	142020	56757	137040	91605	68403	44325	83767	124460	132490	sp|Q9LQ16|PPR94_ARATH *-*- Pentatricopeptide repeat-containing protein IPR002885 (Pentatricopeptide repeat), IPR011990 (Tetratricopeptide-like helical domain) GO:0005515 (protein binding)
1	Niben101Scf14009g02003.1	250360	276940	268850	243540	242940	252960	227010	88362	297740	199970	190570	232090	92221	218170	264670	185790	55256	220170	81620	76343	158610	199060	193230	274760	161170	206500	114650	199440	131560	141180	152370	109610	140220	116410	201340	70404	205850	109490	67549	150330	81687	210890	165660	155790	142830	ref|XP_002521463.1| *-*- Microtubule-associated protein futsch, putative [Ricinus communis] gb|EEF40953.1| Microtubule-associated protein futsch, putative [Ricinus communis]
1	Niben101Scf05929g06003.1	82626	94985	79182	54221	207350	63470	62254	55689	63306	41755	37292	36769	52328	29296	82599	60444	43282	46635	47910	53182	50662	62205	68569	94154	64095	51474	49621	48001	39468	60692	46869	53739	48723	36893	55960	63715	38318	60021	53389	43707	26477	77854	29302	38182	45930	sp|A1WVR6|GATB_HALHL ***- Aspartyl/glutamyl-tRNA(Asn/Gln) amidotransferase subunit B IPR017959 (Aspartyl/glutamyl-tRNA(Asn/Gln) amidotransferase, subunit B /E) GO:0016874 (ligase activity), GO:0016884 (carbon-nitrogen ligase activity, with glutamine as amido-N-donor)
1	Niben101Scf04765g00002.1	177830	186660	81270	86446	165280	189080	122990	107660	97498	73542	151380	71326	106190	172660	96321	78831	130950	73816	111300	91112	101250	112400	85045	63558	103690	47125	80849	72008	149420	66830	79002	104950	74874	125600	180700	62227	110840	56961	74209	102280	56160	100660	32914	64303	44525	AT4G04950.1 ***- thioredoxin family protein LENGTH=488 IPR004480 (Monothiol glutaredoxin-related), IPR012336 (Thioredoxin-like fold) GO:0009055 (electron carrier activity), GO:0015035 (protein disulfide oxidoreductase activity), GO:0045454 (cell redox homeostasis)
1	Niben101Scf03167g02011.1	617190	647480	596720	592430	597220	605820	615660	469840	488310	667940	658120	441970	498390	249720	367700	393130	594720	432500	382160	321270	342730	393430	430620	400850	415070	362130	329380	299470	324160	316290	270610	269760	338630	295760	361450	307690	270820	261180	273260	225630	329600	264190	250550	227560	269640	sp|Q9SU40|SKU5_ARATH ***- Monocopper oxidase-like protein SKU5 IPR008972 (Cupredoxin) GO:0005507 (copper ion binding), GO:0016491 (oxidoreductase activity), GO:0055114 (oxidation-reduction process)
1	Niben101Scf00497g02004.1	226340	157760	230730	126700	177580	159310	203240	273020	196230	70736	322630	132790	190410	104180	123100	117610	114090	135300	144430	166680	186700	153140	155650	174270	158260	140640	118460	145210	347840	176050	152280	108300	150700	148760	100030	228120	104350	88339	177000	113020	73170	74489	88911	87215	91566	AT1G23180.1 ***- ARM repeat superfamily protein LENGTH=834 IPR016024 (Armadillo-type fold) GO:0005488 (binding), GO:0005515 (protein binding)
1	Niben101Scf00324g00002.1	937910	922120	874120	823740	817030	801730	915390	951920	944950	861620	833980	809910	774840	397250	847260	868530	814790	848560	613140	659760	628440	713310	717450	744650	589220	581810	569540	609170	585060	597470	562790	600270	603220	631580	756120	758470	646640	575940	587720	573050	555900	553810	485270	498460	547200	ref|WP_025921648.1| *-*- MULTISPECIES: hypothetical protein [Prochlorococcus] IPR021659 (Protein of unknown function DUF3252)
1	Niben101Scf00557g00008.1	138580	294230	304190	271230	307670	325270	330930	139120	500210	136120	443450	121100	211390	113480	85748	463340	147880	138560	211330	443740	157230	182650	194730	159130	136160	145820	131700	188330	157670	162050	267540	166260	163090	175270	196270	201580	154570	152760	145100	146320	112860	144230	117310	192040	196820	ref|XP_003590923.1| *-*- Ammonium transporter [Medicago truncatula]
1	Niben101Scf02706g01001.1	74506	66782	47906	57104	44008	65871	54570	184950	54498	55676	40001	49466	44237	27800	51631	55210	52009	28531	42523	37413	55166	57201	67723	54371	44594	51551	52686	39345	37172	49083	55422	29331	49262	41766	19710	38211	43421	38553	37013	33055	44878	40111	40404	43469	50826	sp|B5YID4|SYC_THEYD **** Cysteine--tRNA ligase IPR009080 (Aminoacyl-tRNA synthetase, class 1a, anticodon-binding), IPR024909 (Cysteinyl-tRNA synthetase/mycothiol ligase) GO:0000166 (nucleotide binding), GO:0004812 (aminoacyl-tRNA ligase activity), GO:0004817 (cysteine-tRNA ligase activity), GO:0005524 (ATP binding), GO:0005737 (cytoplasm), GO:0006418 (tRNA aminoacylation for protein translation),…
1	Niben101Scf31633g00005.1	129960	106180	71083	122270	115970	112390	119050	115130	89372	105910	118400	86313	116370	8938.5	11032	141660	9863.5	84872	132710	8230.8	8081	111590	106960	99633	12959	6768.6	105780	93347	114440	87975	98285	89984	1334	104410	12481	116800	11918	11975	99216	6730.6	12852	14540	78143	118010	11813	AT2G35800.1 ***- mitochondrial substrate carrier family protein LENGTH=823 IPR002067 (Mitochondrial carrier protein), IPR011992 (EF-hand domain pair), IPR023395 (Mitochondrial carrier domain) GO:0005509 (calcium ion binding), GO:0055085 (transmembrane transport)
1	Niben101Scf00809g01011.1	11159	23106	45167	24428	21814	22281	12300	13431	25259	14572	14701	9966.2	20047	17945	18956	16066	5031.6	14262	7345.3	22110	10451	13218	16605	7946.1	3722.9	12672	12544	3341.1	6630.6	13193	20160	11849	8064.5	6452.4	8034.5	5969.8	5303.1	6560.3	14821	11959	5895.4	6156	5191	6803.3	5155.8	prf||1808322A **** stearoyl-acyl carrier protein desaturase IPR005067 (Fatty acid desaturase, type 2), IPR009078 (Ferritin-like superfamily) GO:0006631 (fatty acid metabolic process), GO:0006633 (fatty acid biosynthetic process), GO:0016491 (oxidoreductase activity), GO:0045300 (acyl-[acyl-carrier-protein] desaturase activity), GO:0055114 (oxidation-reduction process)
1	Niben101Scf00548g00009.1	142070	41136	43173	50346	48430	63778	54129	74328	95428	42931	30120	61913	31275	56610	93571	29045	63676	53785	56627	64932	46690	43979	39916	53039	40844	36524	25941	32966	25965	97889	45365	31637	30778	32706	30540	35327	22533	14896	30164	31737	28907	49139	52310	51964	49594	sp|Q9SSR4|PPR77_ARATH ***- Pentatricopeptide repeat-containing protein IPR002625 (Smr protein/MutS2 C-terminal), IPR002885 (Pentatricopeptide repeat), IPR011990 (Tetratricopeptide-like helical domain) GO:0005515 (protein binding)
1	Niben101Scf00170g05007.1	645760	200210	192570	167430	208250	194100	327620	333180	321450	235400	236390	249540	149350	203720	206500	292400	233610	168640	121920	148720	107040	112400	131240	106070	247430	122060	371080	130970	142280	162300	116840	142390	243700	137070	152260	534610	188810	174740	132160	110320	161330	30284	84774	146050	64625	AT2G44830.1 *-** Protein kinase superfamily protein LENGTH=765 IPR000014 (PAS domain), IPR000700 (PAS-associated, C-terminal), IPR011009 (Protein kinase-like domain) GO:0000155 (phosphorelay sensor kinase activity), GO:0000160 (phosphorelay signal transduction system), GO:0004672 (protein kinase activity), GO:0004674 (protein serine/threonine kinase activity), GO:0004871 (signal transducer activi…
1	Niben101Scf11283g00002.1	25659	26825	27343	11079	9349	8270.5	6545.4	9397.1	10480	5781.1	7024.5	8651.2	9204.7	10489	12223	13115	12397	11338	12186	4656	10853	7780.1	14046	5808	12568	11461	9886.4	6706.7	7266.8	7546.3	8026.2	8121.3	2715.2	4599.3	6635.4	6040.3	2916.4	7621.7	3997	9301.4	10077	10392	4550	3398.6	4443.7	sp|Q9SSK9|MLP28_ARATH ***- MLP-like protein 28 IPR000916 (Bet v I domain), IPR023393 (START-like domain) GO:0006952 (defense response), GO:0009607 (response to biotic stimulus)
1	Niben101Scf15109g00018.1	323390	76528	327710	62412	45414	79464	393590	452590	428640	56514	67042	72775	74872	322070	315510	71470	67243	44534	77617	89264	102370	213800	139300	146420	39068	221650	166570	45159	148440	52616	121710	106030	142960	249670	130060	58981	50614	36370	36844	193370	53757	59031	139480	150380	128540	sp|Q948T6|LGUL_ORYSJ **** Lactoylglutathione lyase IPR004361 (Glyoxalase I), IPR029068 (Glyoxalase/Bleomycin resistance protein/Dihydroxybiphenyl dioxygenase) GO:0004462 (lactoylglutathione lyase activity), GO:0046872 (metal ion binding)
1	Niben101Scf02056g03001.1	41716	99263	95376	110680	114450	83190	42282	54703	29726	82134	64395	59620	67950	24515	78960	13987	23434	11075	69442	47992	19872	58189	66004	59611	41044	51244	46096	69501	57390	37544	58919	45216	58705	22629	17049	21561	24695	29089	40357	30517	40652	15029	38819	46577	40262	ref|WP_010166555.1| ***- glyoxalase [Pseudomonas sp. PAMC 25886] IPR029068 (Glyoxalase/Bleomycin resistance protein/Dihydroxybiphenyl dioxygenase)
1	Niben101Scf11245g01002.1	127780	123050	98556	114180	114950	120700	125410	77398	105600	109110	39998	98891	53531	122880	37372	135910	113430	36850	124220	104950	92665	126510	126390	152610	98862	8433.7	103660	81179	12037	12069	38703	80027	90339	69184	94936	90856	79514	71410	57837	79632	86906	88619	65953	31157	61423	sp|Q60AU6|ERPA2_METCA **** Iron-sulfur cluster insertion protein ErpA 2 IPR000361 (FeS cluster biogenesis), IPR016092 (FeS cluster insertion protein) GO:0005198 (structural molecule activity), GO:0016226 (iron-sulfur cluster assembly), GO:0051536 (iron-sulfur cluster binding)
1	Niben101Scf06437g01008.1	113700	106200	120080	130350	119320	117990	93791	66152	96003	94561	134950	79363	112010	81260	99494	80701	73341	68609	72254	90593	127700	98184	93481	78934	88352	86331	78080	79744	67364	79912	87106	81712	100460	80517	77807	91746	65267	53896	85262	77144	77199	70459	65935	52729	71304	sp|Q8KBK4|RL13_CHLTE ***- 50S ribosomal protein L13 IPR005822 (Ribosomal protein L13), IPR023563 (Ribosomal protein L13, conserved site), IPR023564 (Ribosomal protein L13 domain) GO:0003735 (structural constituent of ribosome), GO:0005840 (ribosome), GO:0006412 (translation)
1	Niben101Scf03913g01045.1	161640	241400	239600	167940	121770	180880	394950	171810	356470	158530	150370	127500	306850	153350	134680	141680	166570	116050	154170	152250	120390	154050	126290	155030	130190	108160	144710	102970	99332	67338	89429	124750	155150	102560	137620	163150	216560	181550	82611	72540	64976	142310	68121	94239	121970	sp|Q9SVE5|EXLA2_ARATH ***- Expansin-like A2 IPR007118 (Expansin/Lol pI) GO:0005576 (extracellular region), GO:0019953 (sexual reproduction)
1	Niben101Scf01596g12001.1	1748	21905	20727	32188	29615	28165	27332	23441	24684	3409.3	13720	2251.9	20835	15145	15329	25789	19826	21098	11874	16186	13833	8181.7	7247.8	2315.6	11022	14184	12710	8369	10100	9656.7	6677.2	6565.9	8967	7526.9	18185	6792.1	8809	7711.3	5852	10985	4121.5	1899.9	11816	9547.2	11164	AT5G04740.1 ***- ACT domain-containing protein LENGTH=301
1	Niben101Scf03284g03008.1	23844	33735	6982.5	27978	28631	38964	29459	27830	32958	17595	23294	22082	29963	7290.9	25943	22672	27424	26435	11389	15191	23442	23198	27197	20444	6132.5	27197	17257	19006	26275	27874	19872	26348	22279	29808	27071	20166	10839	17482	16782	16677	19939	8174.3	19796	5064.1	11887	sp|B1YIH8|GAL1_EXIS2 **** Galactokinase IPR006206 (Mevalonate/galactokinase) GO:0004335 (galactokinase activity), GO:0005524 (ATP binding), GO:0005737 (cytoplasm), GO:0006012 (galactose metabolic process), GO:0008152 (metabolic process), GO:0016301 (kinase activity), GO:0016773 (phosphotransferase activity, alcohol group as acceptor), GO:0046835 (carbohydrate phosphorylation)
1	Niben101Ctg15998g00002.1	50013	48670	49578	61235	43781	44300	70084	43136	50278	47797	33385	32474	50398	20788	83446	6712.7	36277	43660	52828	48300	28390	59588	61756	63702	44636	53031	47837	44321	20609	41112	46991	30245	37094	40041	17427	29744	54460	21439	20409	20538	26214	32135	31338	26716	25033	gb|KEH42928.1| *-*- subtilisin-like serine protease [Medicago truncatula]
1	Niben101Scf00869g01010.1	134430	136040	128370	14564	80085	15117	84111	103260	99237	24767	12111	87517	87822	89060	96447	19935	11418	83496	14655	71243	20592	31830	32616	26706	51591	52115	49759	28350	11398	74417	9098.8	69141	75850	53234	8262.5	19566	12581	7443.9	16269	5296.9	42708	16406	34962	7528.7	24986	Unknown protein
1	Niben101Scf02133g02001.1	95609	9974	12613	27735	26321	26634	36673	43667	36338	23514	19118	27352	29454	29574	18522	23121	22577	22795	4093	25339	9181.3	28998	33313	33946	25532	27026	23590	16132	24116	31595	13818	39029	22772	35038	5909.9	18506	11969	5740.4	5995.1	14520	10778	12603	25051	13769	19054	AT1G34750.1 ***- Protein phosphatase 2C family protein LENGTH=282 IPR001932 (Protein phosphatase 2C (PP2C)-like domain), IPR015655 (Protein phosphatase 2C) GO:0003824 (catalytic activity)
1	Niben101Scf04950g01017.1	16008	28240	25559	45106	39774	35020	5809.5	32566	17921	31069	5960.5	16045	17558	19218	11214	41433	14398	17039	15594	49177	16818	13414	19328	26456	15412	8201.9	14249	15626	10197	24421	15413	17294	18374	11532	9998.9	11587	10026	17479	17480	10499	2996.6	9294.3	12780	13740	4462.3	sp|Q9UUC8|RM51_SCHPO ***- 54S ribosomal protein L51, mitochondrial IPR007741 (Ribosomal protein/NADH dehydrogenase domain), IPR012336 (Thioredoxin-like fold)
1	Niben101Scf01037g02015.1	55057	22077	61711	55309	55743	58776	81065	73966	72345	44964	42040	45002	57341	63057	51525	43228	46587	50370	34322	35298	16786	46833	46723	44826	30879	26807	33635	37982	29193	37528	48705	47780	18640	38383	42077	40669	32266	30530	34377	30279	30653	12263	31492	33483	32740	ref|WP_020168450.1| ***- MULTISPECIES: cupin [Methylotenera] IPR014710 (RmlC-like jelly roll fold)
1	Niben101Scf22680g01001.1	33400	27826	27479	22515	42460	23888	48387	49347	39826	33170	8830.1	31110	39974	30925	35123	17305	26344	11564	22784	19583	27853	10016	21840	10868	55986	52330	19926	17120	16887	6755.5	16218	13757	7954.6	6649.3	20169	8667.1	14263	12157	10103	41171	11085	14722	17317	34906	4598.8	AT2G34510.1 ***- Protein of unknown function, DUF642 LENGTH=401 IPR006946 (Protein of unknown function DUF642), IPR008979 (Galactose-binding domain-like)
2	Niben101Scf00110g05008.1	942810	936820	938510	903700	900270	897410	923590	978240	964660	860510	822710	826750	924200	895970	905330	848440	777930	778810	591650	583290	1212400	591940	1046800	717220	951930	639340	624010	754930	820040	744360	815070	986440	806780	691960	763700	830760	669620	601730	690450	572330	542280	573540	495090	594930	517640	sp|C6E178|SECA_GEOSM ***- Protein translocase subunit SecA IPR000185 (Protein translocase subunit SecA), IPR027417 (P-loop containing nucleoside triphosphate hydrolase) GO:0005524 (ATP binding), GO:0006605 (protein targeting), GO:0006886 (intracellular protein transport), GO:0016020 (membrane), GO:0017038 (protein import)
2	Niben101Scf16898g00001.1	2526800	2477700	2466200	3181100	3190800	3172500	2917700	2851000	2882000	2091500	2041500	1937300	2656400	2654900	2741700	2281100	2273900	2250100	2117900	2070400	2147500	2045600	2075400	2017100	2064200	2024000	2061700	1491000	1481600	1465700	1688300	1666100	1743300	1668900	1942400	2002100	1034800	987510	1018800	750090	716810	721980	726290	867930	904900	sp|Q9TL08|CHLI_NEPOL **** Magnesium-chelatase subunit ChlI IPR011775 (Magnesium chelatase, ATPase subunit I), IPR027417 (P-loop containing nucleoside triphosphate hydrolase) GO:0005524 (ATP binding), GO:0006779 (porphyrin-containing compound biosynthetic process), GO:0015979 (photosynthesis), GO:0015995 (chlorophyll biosynthetic process), GO:0016851 (magnesium chelatase activity)
2	Niben101Scf10158g01035.1	1408600	1352900	1284100	1501900	1559500	1434300	1600100	1683900	1641000	1206800	1148600	1094500	1419300	1361400	1389100	1259200	1246300	1215700	1087200	1113400	1138300	1154200	1178500	1184300	973550	1044500	1030400	912290	895340	871510	901120	912800	916710	963910	1224200	1122200	885850	758380	758210	664720	609140	645050	801180	802780	815470	sp|A6L7E4|DAPAT_BACV8 **** LL-diaminopimelate aminotransferase IPR015424 (Pyridoxal phosphate-dependent transferase), IPR019942 (LL-diaminopimelate aminotransferase, plants and Chlamydia type) GO:0003824 (catalytic activity), GO:0009058 (biosynthetic process), GO:0009089 (lysine biosynthetic process via diaminopimelate), GO:0010285 (L,L-diaminopimelate aminotransferase activity), GO:0030170 (pyri…
2	Niben101Scf06291g03023.1	275390	274120	262500	233760	232080	247210	243450	233940	240060	217490	208040	203600	183060	181660	199720	209990	236910	218030	211180	209550	212500	210940	270600	241340	200900	204740	204170	200680	218750	201010	228970	246550	224160	229850	228290	243060	154440	158220	149030	136570	137110	138290	152550	155390	179540	sp|A7Z0M6|RL10_BACA2 ***- 50S ribosomal protein L10 IPR001790 (Ribosomal protein L10/acidic P0) GO:0005622 (intracellular), GO:0042254 (ribosome biogenesis)
2	Niben101Scf02990g06003.1	839460	949790	877030	783670	658820	636820	727960	765230	806130	731510	675540	544230	674810	659920	668770	646240	529550	647810	382480	979040	432270	417780	465580	418850	357910	337750	915970	315370	826170	850830	218830	227010	724320	233670	507830	343870	256180	217750	271240	248860	271400	189790	172510	179120	208630	AT4G37800.1 **** xyloglucan endotransglucosylase/hydrolase 7 LENGTH=293 IPR013320 (Concanavalin A-like lectin/glucanase domain), IPR016455 (Xyloglucan endotransglucosylase/hydrolase) GO:0004553 (hydrolase activity, hydrolyzing O-glycosyl compounds), GO:0005618 (cell wall), GO:0005975 (carbohydrate metabolic process), GO:0006073 (cellular glucan metabolic process), GO:0016762 (xyloglucan:xylogluco…
2	Niben101Scf00167g04011.1	10129000	10078000	9469700	11149000	11003000	10560000	11688000	11797000	11756000	8914000	9198100	9116300	9906000	10297000	10753000	9073500	9521800	9541400	9615400	9460800	9065200	7808900	8311600	8337800	9056700	8784200	9317900	7268300	7538300	7476000	7707300	7205500	7383600	7332300	7978400	8474800	6479700	5915300	6052000	5742000	5694100	5772200	5728700	5752400	6068800	sp|Q8DLP3|ATPA_THEEB **** ATP synthase subunit alpha IPR005294 (ATPase, F1 complex, alpha subunit), IPR023366 (ATP synthase subunit alpha-like domain), IPR027417 (P-loop containing nucleoside triphosphate hydrolase) GO:0005524 (ATP binding), GO:0015986 (ATP synthesis coupled proton transport), GO:0015991 (ATP hydrolysis coupled proton transport), GO:0015992 (proton transport), GO:0016820 (hydrola…
2	Niben101Scf11937g00001.1	1086500	1077700	1005600	1109100	1162400	1184500	1178900	1204700	1177300	987660	988770	960660	986550	981800	1046900	1014800	1019200	1043400	851120	859650	873690	869750	865980	872000	844740	885050	862650	658320	650520	653110	628750	628980	664230	720750	846060	841720	488530	452640	530070	501230	515860	530850	477630	499600	512420	sp|P40690|ALKE_BABBO -**- Aldo-keto reductase IPR001395 (Aldo/keto reductase), IPR023210 (NADP-dependent oxidoreductase domain)
2	Niben101Scf06799g00004.1	200110	195620	195870	157750	154620	160340	161590	156580	162350	144200	125950	128370	159460	140180	150520	126570	123550	115250	117770	108200	111010	151510	154230	154730	146410	143700	137510	109900	118040	113410	141410	125910	134580	125130	112870	103770	81257	67775	69598	71859	63596	65861	68660	71245	70006	sp|B9JCB6|RL9_AGRRK *-*- 50S ribosomal protein L9 IPR000244 (Ribosomal protein L9) GO:0003735 (structural constituent of ribosome), GO:0005622 (intracellular), GO:0005840 (ribosome), GO:0006412 (translation)
2	Niben101Scf01005g11010.1	709170	736200	773690	795900	883710	868430	975950	980520	967420	716510	811600	627340	623720	709950	734840	584040	748650	602990	638730	629230	529750	784770	762200	781920	664980	749270	712710	524770	347130	421370	510070	373220	385730	472910	439360	507310	176060	278280	310520	299690	334030	317560	289250	228510	226920	ref|XP_003615152.1| **** 2-dehydro-3-deoxyphosphoheptonate aldolase (3-deoxy-d-arabino-heptulosonate 7-phosphate synthase) [Medicago truncatula] gb|AES98110.1| phospho-2-dehydro-3-deoxyheptonate aldolase [Medicago truncatula] IPR002480 (DAHP synthetase, class II) GO:0003849 (3-deoxy-7-phosphoheptulonate synthase activity), GO:0009073 (aromatic amino acid family biosynthetic process)
2	Niben101Scf08691g00013.1	499550	504700	508350	418630	389750	344220	352040	333660	347850	244350	266610	223050	317180	317280	349060	295800	301510	321810	302420	307310	320090	415230	413660	417170	343800	343720	360930	243470	246630	274060	271940	270270	282600	266530	289250	242210	199650	153010	150670	147530	155610	136860	137300	157620	139910	sp|Q9NW13|RBM28_HUMAN *-** RNA-binding protein 28 IPR012677 (Nucleotide-binding alpha-beta plait domain) GO:0000166 (nucleotide binding), GO:0003676 (nucleic acid binding)
2	Niben101Scf06078g02032.1	814820	968840	901530	957260	864420	802030	510690	463710	465890	1113000	1027900	1018300	1266400	1090700	1220900	1223500	1025200	1193200	850630	781870	750670	968860	887140	1005500	901640	749630	705080	853010	740260	755700	928920	922710	803470	876940	752710	1217200	509890	987750	909640	856440	626820	648730	1004400	795800	960830	gb|AAF14244.1|AF110228_1 ***- nuclear RNA binding protein A [Spinacia oleracea] IPR006861 (Hyaluronan/mRNA-binding protein), IPR019084 (Stm1, N-terminal)
2	Niben101Scf05396g07006.1	162430	157220	140940	147690	150430	140200	137340	262380	154530	268100	287600	297670	335620	331070	364680	281400	276570	271630	230560	245090	243840	271390	153810	137140	214720	120950	127130	130530	122570	144900	150330	248950	138510	148500	185110	152380	154330	149260	171590	124340	120880	124240	123290	161790	145560	sp|Q76LC6|RBM24_DANRE *-** RNA-binding protein 24 IPR012677 (Nucleotide-binding alpha-beta plait domain) GO:0000166 (nucleotide binding), GO:0003676 (nucleic acid binding)
2	Niben101Scf00474g02009.1	189290	184970	163490	234390	223320	230950	222060	224860	220270	176130	164960	159380	153970	176230	168990	206900	188800	197670	156190	164450	186300	161120	153990	152520	179510	173290	169990	145790	145070	140900	131900	134860	136060	153250	140540	160150	127780	92704	105410	110640	126530	132180	80620	89734	97445	sp|Q5RC80|RBM39_PONAB *-** RNA-binding protein 39 IPR012677 (Nucleotide-binding alpha-beta plait domain) GO:0000166 (nucleotide binding), GO:0003676 (nucleic acid binding)
2	Niben101Scf04779g01006.1	397920	440090	446080	490700	464580	480600	312050	389360	351640	363220	202260	265100	321540	365870	320160	405200	353230	374870	342840	363080	384700	313090	466200	352770	364130	388440	387850	138140	248520	225650	177380	109500	185350	154820	288510	159360	177330	175800	179310	160680	131090	126680	167400	186240	177330	sp|Q2IJ93|EFG1_ANADE ***- Elongation factor G 1 IPR000795 (Elongation factor, GTP-binding domain), IPR005225 (Small GTP-binding protein domain), IPR009000 (Translation protein, beta-barrel domain), IPR027417 (P-loop containing nucleoside triphosphate hydrolase) GO:0003924 (GTPase activity), GO:0005525 (GTP binding)
2	Niben101Scf03113g03018.1	2494100	2700900	2538600	2143700	2282100	2090300	2376500	2409100	2432200	2194200	2065200	2099800	1992500	1831000	1941000	2172300	2121300	2211500	1706800	1697700	1767100	2122000	2218600	2222700	1995600	1967900	1966800	1756700	1827900	1783400	1552900	1556600	1541700	1565600	1799100	1773800	1566200	1419800	1479600	1547900	1695100	1511000	1184600	1186100	1245400	ref|WP_012307378.1| ***- NAD dependent epimerase/dehydratase family protein [Synechococcus sp. PCC 7002] ref|YP_001735011.1| NAD dependent epimerase/dehydratase family protein [Synechococcus sp. PCC 7002] gb|ACA99755.1| NAD dependent epimerase/dehydratase family protein [Synechococcus sp. PCC 7002] IPR016040 (NAD(P)-binding domain)
2	Niben101Scf05694g00002.1	104300	94210	104840	114600	107330	108470	100460	100470	107990	78086	66552	72750	102060	113140	101300	81912	77042	80292	69109	66516	68552	83551	80277	77837	73278	64095	66955	52203	22530	54321	53315	52897	52470	26377	50466	50501	35128	5266.5	6425.1	33081	9970.5	30026	24302	22213	7511	sp|Q9FXA2|PABP8_ARATH *-** Polyadenylate-binding protein 8 IPR012677 (Nucleotide-binding alpha-beta plait domain) GO:0000166 (nucleotide binding), GO:0003676 (nucleic acid binding)
2	Niben101Scf04558g02035.1	1402400	1352900	1309900	1190400	1246000	1216300	1409500	1471300	1434900	1170400	1142900	1021800	1164300	1184000	1227100	1202300	1278800	1238800	840510	840650	847840	1061900	1112300	1070600	910780	952660	912570	906650	864650	877540	794560	508620	770580	808290	1019500	1036900	870690	738240	813210	700210	700870	723970	626040	654650	716790	AT2G21530.1 ***- SMAD/FHA domain-containing protein LENGTH=209 IPR008984 (SMAD/FHA domain) GO:0005515 (protein binding)
2	Niben101Scf00653g01009.1	831970	857760	877360	910570	911490	846320	867300	813140	792680	690890	682610	628910	569870	590360	595150	686080	714840	709440	569090	550070	575380	571410	591290	527850	520880	579190	534100	419120	407060	427290	345000	350270	352300	368270	403780	360970	222680	201870	196020	173150	175970	156430	171980	178870	335660	AT5G16400.1 *-*- thioredoxin F2 LENGTH=185 IPR005746 (Thioredoxin), IPR012336 (Thioredoxin-like fold) GO:0006662 (glycerol ether metabolic process), GO:0015035 (protein disulfide oxidoreductase activity), GO:0045454 (cell redox homeostasis)
2	Niben101Scf02602g00001.1	794620	1009400	835720	962300	930920	857680	1025500	1165700	1137200	759860	731300	724440	721780	671840	801400	799610	781300	881960	813580	756250	950190	810080	780990	957940	746320	743590	714870	601660	596980	548520	538310	576220	582640	562710	670600	502960	399680	348370	287550	427320	414620	377730	526650	524790	333840	AT4G03520.1 ***- Thioredoxin superfamily protein LENGTH=186 IPR005746 (Thioredoxin), IPR012336 (Thioredoxin-like fold) GO:0006662 (glycerol ether metabolic process), GO:0015035 (protein disulfide oxidoreductase activity), GO:0045454 (cell redox homeostasis)
2	Niben101Scf05174g02001.1	68541	77636	70575	79333	83416	79590	67339	73480	72209	63235	65822	60902	64497	63990	72618	63650	70687	65636	58873	62650	53958	57179	53361	54941	45027	50435	50673	46903	52385	48311	42015	45312	45882	51881	53799	44650	46061	39550	39999	14726	46319	43059	42260	40692	26349	AT1G07700.3 ***- Thioredoxin superfamily protein LENGTH=217 IPR005746 (Thioredoxin), IPR012336 (Thioredoxin-like fold) GO:0006662 (glycerol ether metabolic process), GO:0015035 (protein disulfide oxidoreductase activity), GO:0045454 (cell redox homeostasis)
2	Niben101Scf15166g03013.1	72625	98429	27848	28263	49204	105410	140170	131940	121250	171060	167920	166650	35032	157530	154090	177140	163830	171440	110940	147560	42103	131920	127340	118600	118120	127860	117650	158600	159940	155450	139870	129700	144750	154530	35020	26163	120730	59461	69334	28774	89400	87212	36160	33354	82175	AT5G24270.1 **** Calcium-binding EF-hand family protein LENGTH=222 IPR011992 (EF-hand domain pair) GO:0005509 (calcium ion binding)
2	Niben101Scf10877g00006.1	76277	74377	80989	90082	90160	92358	98815	108660	99599	76297	65125	65771	74403	84866	81381	70238	66520	72909	56866	37794	58747	71827	70141	65021	57694	59540	54573	46068	43949	38524	47829	48403	49253	44123	81026	64482	41040	43222	31582	30306	27901	26182	22439	27746	33611	sp|Q7UGJ6|CARA_RHOBA **** Carbamoyl-phosphate synthase small chain IPR006274 (Carbamoyl-phosphate synthase, small subunit), IPR029062 (Class I glutamine amidotransferase-like) GO:0006543 (glutamine catabolic process), GO:0070409 (carbamoyl phosphate biosynthetic process)
2	Niben101Scf07687g02005.1	132960	159510	151460	106830	32266	37771	189430	146920	27491	303220	280970	306730	132280	142270	146940	210540	229840	244830	154810	152360	156820	124750	153820	152590	105030	108630	116760	128940	133570	123980	93363	100990	9046.6	104840	138560	162160	161130	154250	147900	49331	98463	125430	83313	80350	133120	AT2G05620.1 ***- proton gradient regulation 5 LENGTH=133
2	Niben101Scf01482g02015.1	21873	86295	74840	42043	38901	28435	24228	34943	99224	120050	169370	118710	174770	156860	159570	106290	102100	30741	35083	23086	37508	140740	33297	94589	82232	50849	26601	30244	94805	12824	45885	39274	44089	37343	105340	44870	23051	31231	129550	25780	48163	18521	19823	32582	66380	sp|Q5RCU0|TF2AA_PONAB --** Transcription initiation factor IIA subunit 1 IPR004855 (Transcription factor IIA, alpha/beta subunit), IPR009083 (Transcription factor IIA, helical) GO:0005672 (transcription factor TFIIA complex), GO:0006367 (transcription initiation from RNA polymerase II promoter)
2	Niben101Scf06287g00001.1	18426	50032	2869.3	27624	25550	24284	28311	26017	23908	50995	50707	53409	61476	58275	60391	42651	47801	51573	31675	28599	29864	17419	34344	36992	31791	30373	32993	33936	31776	33184	29296	31810	30665	35150	13213	4156.3	21646	19736	12731	19354	14834	21451	22418	21769	5756.5	ref|NP_001148234.1| **** carboxylic ester hydrolase/ hydrolase, acting on ester bonds [Zea mays] gb|ACG30251.1| carboxylic ester hydrolase/ hydrolase, acting on ester bonds [Zea mays] IPR013830 (SGNH hydrolase-type esterase domain) GO:0006629 (lipid metabolic process), GO:0016788 (hydrolase activity, acting on ester bonds)
2	Niben101Scf03563g00036.1	72339	78011	72431	85245	85873	76894	84685	79457	83966	68322	65463	62849	73261	80929	76830	70501	66739	72306	56054	53662	56848	67742	63508	63554	57387	52546	52853	51205	44260	49016	51878	46884	48286	52060	51143	52643	42653	43849	37042	37337	36006	52493	38382	33560	46616	sp|B8J4E4|SYT_DESDA **** Threonine--tRNA ligase IPR002320 (Threonine-tRNA ligase, class IIa) GO:0000166 (nucleotide binding), GO:0004812 (aminoacyl-tRNA ligase activity), GO:0004829 (threonine-tRNA ligase activity), GO:0005524 (ATP binding), GO:0005737 (cytoplasm), GO:0006418 (tRNA aminoacylation for protein translation), GO:0006435 (threonyl-tRNA aminoacylation), GO:0016876 (ligase activity, for…
2	Niben101Scf02318g02002.1	266350	270080	266050	258930	287530	274630	282270	290570	297480	226620	215470	214720	271450	275490	280060	234160	234430	226950	227380	224610	230530	316990	305620	307010	246470	243530	240820	203620	197580	204660	207290	218430	208360	211690	223140	249530	136210	136130	135360	126610	135950	131160	114390	106190	119790	sp|B7JWV1|RS20_CYAP8 --*- 30S ribosomal protein S20 IPR002583 (Ribosomal protein S20) GO:0003723 (RNA binding), GO:0003735 (structural constituent of ribosome), GO:0005622 (intracellular), GO:0005840 (ribosome), GO:0006412 (translation)
2	Niben101Scf12966g00016.1	4213500	4031400	4077300	4289900	4323900	4247000	4932900	5116500	5089700	4292900	4059400	3901200	3469300	3427900	3526100	4372500	4384000	4288200	3188900	3234300	3215000	3862500	3964500	3836200	3583000	3541200	3615300	3458400	3431200	3360500	3147900	3096300	3053200	3043800	3440600	3388600	2684600	2355600	2446200	2407100	2411800	2446900	2068000	2051800	2192000	sp|P51375|GLTB_PORPU **** Ferredoxin-dependent glutamate synthase IPR013785 (Aldolase-type TIM barrel), IPR029055 (Nucleophile aminohydrolases, N-terminal) GO:0003824 (catalytic activity), GO:0006537 (glutamate biosynthetic process), GO:0006807 (nitrogen compound metabolic process), GO:0008152 (metabolic process), GO:0015930 (glutamate synthase activity), GO:0016638 (oxidoreductase activity, acti…
2	Niben101Scf06382g00006.1	1696300	1700500	1647700	1802800	1788900	1844500	1841200	1935000	1923700	1401700	1386900	1222200	1817600	1872400	1770300	1512300	1556000	1508200	1066900	1041300	1058700	1342700	1274300	1239500	1018300	1054200	1055400	922060	916760	937280	1037000	975270	1006000	984230	1360500	1227800	1038400	864760	905320	726110	730930	738660	682300	715560	683880	AT3G48730.1 **** glutamate-1-semialdehyde 2,1-aminomutase 2 LENGTH=472 IPR005814 (Aminotransferase class-III), IPR015424 (Pyridoxal phosphate-dependent transferase) GO:0003824 (catalytic activity), GO:0008483 (transaminase activity), GO:0030170 (pyridoxal phosphate binding), GO:0033014 (tetrapyrrole biosynthetic process), GO:0042286 (glutamate-1-semialdehyde 2,1-aminomutase activity)
2	Niben101Scf01155g00008.1	2534100	2631300	2502400	2835000	2924600	2736000	2984300	3046300	2744300	2552100	2429400	2311000	2590100	2596500	2717200	2350400	2834700	2826000	1958800	1959300	1938100	2244900	2232100	2197400	2349200	2125200	2141900	1918500	1846400	1849100	1687400	1721800	1630800	1826900	2192900	2050800	1869000	1673200	1688400	1689000	1486700	1847000	1387400	1393100	1509600	sp|A7RK30|QORL2_NEMVE **** Quinone oxidoreductase-like protein 2 homolog IPR002085 (Alcohol dehydrogenase superfamily, zinc-type), IPR016040 (NAD(P)-binding domain), IPR020843 (Polyketide synthase, enoylreductase domain) GO:0008270 (zinc ion binding), GO:0016491 (oxidoreductase activity), GO:0055114 (oxidation-reduction process)
2	Niben101Scf39473g00004.1	262960	248170	243730	267910	294930	289900	231010	223810	239420	309720	289010	275320	271750	262560	265100	290370	291080	272650	174320	170200	238830	300590	297280	291950	177760	159300	172330	249010	144160	160520	266580	268280	226460	188700	242210	211570	200210	183100	170570	139870	138490	136060	164700	169000	177370	sp|B2JS88|BETB_BURP8 **** NAD/NADP-dependent betaine aldehyde dehydrogenase IPR016161 (Aldehyde/histidinol dehydrogenase), IPR029510 (Aldehyde dehydrogenase, glutamic acid active site) GO:0008152 (metabolic process), GO:0016491 (oxidoreductase activity), GO:0016620 (oxidoreductase activity, acting on the aldehyde or oxo group of donors, NAD or NADP as acceptor), GO:0055114 (oxidation-reduction pr…
2	Niben101Scf04198g01002.1	5540800	4373200	5479600	5409900	5056800	5092400	4111500	2979000	2586100	5540400	5309100	5414200	5397100	5244100	5972800	5696600	5464300	5995500	4287600	4234900	4316200	4219500	4307500	4158200	4448900	4118600	4155000	3674300	3551700	3595100	3457100	3229700	3368100	3344500	2308400	3596900	1637000	2557200	2255500	2888500	3259400	2969200	2985900	2702200	2867400	sp|P55038|GLTS_SYNY3 *-** Ferredoxin-dependent glutamate synthase 2 IPR002489 (Glutamate synthase, alpha subunit, C-terminal), IPR013785 (Aldolase-type TIM barrel) GO:0003824 (catalytic activity), GO:0006537 (glutamate biosynthetic process), GO:0008152 (metabolic process), GO:0015930 (glutamate synthase activity), GO:0016491 (oxidoreductase activity), GO:0016638 (oxidoreductase activity, acting o…
2	Niben101Scf01209g04002.1	1299500	861820	877870	1040600	1156100	1225600	1530500	1314600	1350500	941560	826010	812810	1298500	969360	965420	1027900	865730	889450	858270	617540	750730	941050	806000	683330	672900	460690	545490	312710	429480	635400	494710	604060	423980	545500	712550	780780	938120	332450	369010	266070	235740	197070	261610	442770	331930	sp|Q58321|Y911_METJA *-** Magnesium-chelatase subunit ChlI homolog IPR000523 (Magnesium chelatase, ChlI subunit), IPR002035 (von Willebrand factor, type A), IPR027417 (P-loop containing nucleoside triphosphate hydrolase) GO:0015979 (photosynthesis), GO:0015995 (chlorophyll biosynthetic process), GO:0016851 (magnesium chelatase activity)
2	Niben101Scf00675g01003.1	1418400	1454400	1331400	1360400	1467300	1501500	1475000	1591800	1687700	1365700	1300100	1289400	1504600	1383900	1506400	1287000	1324700	1325800	1066400	1100500	1072100	1215600	1334900	1268100	1182400	1141200	1142500	1179700	1196800	1209100	1016300	1041300	1079900	1136400	1219800	1056400	1051700	662020	837510	1095400	1100900	1284500	719550	672180	799850	AT1G55810.1 **** uridine kinase-like 3 LENGTH=466 IPR000764 (Uridine kinase like), IPR027417 (P-loop containing nucleoside triphosphate hydrolase), IPR029057 (Phosphoribosyltransferase-like) GO:0004849 (uridine kinase activity), GO:0005524 (ATP binding), GO:0008152 (metabolic process), GO:0016301 (kinase activity), GO:0044206 (UMP salvage)
2	Niben101Scf35628g00001.1	8801200	9601800	9126900	7883800	8241800	7500400	6928900	7498200	7386300	15749000	14971000	15580000	6445900	6834600	7290300	15375000	15981000	16411000	11510000	11504000	11642000	10062000	10076000	9143600	8612700	9852300	9620300	9856400	9876800	9593200	7083800	6163400	6221300	8486400	8366300	8784800	9181700	9267100	8894800	6987400	7000400	6985000	8126600	8648200	9048100	sp|P49107|PSAN_ARATH **** Photosystem I reaction center subunit N, chloroplastic IPR008796 (Photosystem I PsaN, reaction centre subunit N) GO:0005516 (calmodulin binding), GO:0009522 (photosystem I), GO:0015979 (photosynthesis), GO:0042651 (thylakoid membrane)
2	Niben101Scf03154g03001.1	2306600	2555300	2493000	2523600	2604900	2568200	2240800	2150100	2173900	2021700	1937500	1802900	2435300	2354200	2428600	2131800	2081000	1985900	1643200	1490600	1924900	1233600	1278900	1307300	1388100	1403300	1464800	1150900	915150	1171300	1261300	1260200	1127400	1474000	1352000	1272300	915160	941350	935580	970090	1076900	947530	618520	803520	799520	sp|B1L938|RL1_THESQ **** 50S ribosomal protein L1 IPR016095 (Ribosomal protein L1, 3-layer alpha/beta-sandwich), IPR023673 (Ribosomal protein L1, conserved site), IPR023674 (Ribosomal protein L1-like), IPR028364 (Ribosomal protein L1/ribosomal biogenesis protein) GO:0003723 (RNA binding), GO:0003735 (structural constituent of ribosome), GO:0006412 (translation), GO:0015934 (large ribosomal subuni…
2	Niben101Scf03374g00001.1	4692300	4751500	4695800	5173000	4975800	4918900	4130900	3601500	3875000	5166500	4886900	4970100	5093400	5045000	5096200	5129500	4917600	4741800	4579800	4573000	4515700	4809000	4667400	4411200	4063800	4555400	4894800	3962600	4818900	4757600	4880900	3889800	4665600	4823100	3478000	4443000	1936400	2963800	2481200	2939200	3253200	3028600	3025000	3429900	3105000	sp|B7K331|RS19_CYAP8 *-** 30S ribosomal protein S19 IPR001063 (Ribosomal protein L22/L17), IPR002222 (Ribosomal protein S19/S15), IPR002325 (Cytochrome f), IPR009019 (K homology domain, prokaryotic type), IPR015946 (K homology domain-like, alpha/beta), IPR023575 (Ribosomal protein S19, superfamily), IPR024094 (Cytochrome f large domain) GO:0003723 (RNA binding), GO:0003735 (structural constituent…
2	Niben101Scf02425g04005.1	809310	974350	412290	811380	437130	206790	277630	265760	846170	855580	753140	1165900	837660	899720	1051100	879700	934720	421930	750950	289100	657010	577960	714890	700010	577740	665890	660610	745320	638060	410350	331700	736800	758870	347460	839910	845310	699030	667810	774020	281140	673040	693950	508540	498910	586970	AT1G17580.1 **** myosin 1 LENGTH=1520 IPR000048 (IQ motif, EF-hand binding site), IPR002710 (Dilute), IPR004009 (Myosin, N-terminal, SH3-like), IPR027417 (P-loop containing nucleoside triphosphate hydrolase) GO:0003774 (motor activity), GO:0005515 (protein binding), GO:0005524 (ATP binding), GO:0016459 (myosin complex)
2	Niben101Scf06183g03003.1	665140	769990	761690	769090	749760	722410	645470	664030	707370	620420	557810	706400	684610	672440	687420	684400	651170	607520	386290	563820	243820	618200	616570	601200	421140	459790	392560	278960	235300	389290	224720	144760	136720	438360	327770	216240	167530	251500	259740	221270	259770	179380	113730	108780	141810	sp|A7X2H6|UBIE_STAA1 **** Demethylmenaquinone methyltransferase IPR029063 (S-adenosyl-L-methionine-dependent methyltransferase) GO:0008152 (metabolic process), GO:0008168 (methyltransferase activity)
2	Niben101Scf06266g00002.1	256980	248100	200630	231690	251410	253410	268200	276580	256900	166670	232030	252780	207280	211830	190350	193400	240740	266300	200960	153340	212920	211590	204820	211640	242090	192050	194020	178630	90650	131850	176680	145430	199250	184060	274160	190400	152020	56568	176870	165230	132130	119250	173250	151640	118140	sp|Q55276|LCYB_SYNE7 ***- Lycopene beta cyclase IPR008671 (Lycopene cyclase-type, FAD-binding) GO:0016117 (carotenoid biosynthetic process), GO:0016705 (oxidoreductase activity, acting on paired donors, with incorporation or reduction of molecular oxygen)
2	Niben101Scf02021g01005.1	215150	210800	187860	164450	157410	147200	172190	156120	156710	113930	123100	112460	149630	159150	145820	147180	146740	190620	153210	156670	145490	247910	245980	221640	162080	161150	166820	139580	138870	134420	130740	191250	138920	140940	128290	178630	100560	133320	134450	116710	127420	113430	92576	101680	96737	ref|WP_026735807.1| ***- 3-beta hydroxysteroid dehydrogenase [Fischerella sp. PCC 9605] IPR001509 (NAD-dependent epimerase/dehydratase, N-terminal domain), IPR016040 (NAD(P)-binding domain) GO:0003824 (catalytic activity), GO:0050662 (coenzyme binding)
2	Niben101Scf09548g00002.1	277370	233260	320470	146960	121890	197550	247940	264950	264160	187880	173260	183200	129020	165410	156970	227690	189140	170120	192120	247430	209760	147440	224740	189760	192490	121530	214270	122630	163250	124810	151170	151180	156050	188260	213000	203880	67454	106360	117570	67856	139160	132010	127270	93255	68466	gb|AGT97348.1| *-*- EG2771 [Manihot esculenta] IPR006121 (Heavy metal-associated domain, HMA) GO:0030001 (metal ion transport), GO:0046872 (metal ion binding)
2	Niben101Scf00929g00007.1	6083.1	6780.6	8013.8	11234	8737.6	8381.1	6495.1	3965.9	3675.7	6044.1	8931.9	9840.4	22109	18634	20994	9211.2	7590.1	6758.9	15018	13414	10555	7883.7	8521.8	8204.2	9816	12144	14044	6143.8	8008.1	1011.6	7363.4	7162.3	7264.2	10670	1959.1	7792	1611.8	4577.4	7994.9	1259.7	4545.5	7808.5	3061.7	2924.3	766.29	AT4G13850.1 *-** glycine-rich RNA-binding protein 2 LENGTH=158 IPR012677 (Nucleotide-binding alpha-beta plait domain) GO:0000166 (nucleotide binding), GO:0003676 (nucleic acid binding)
2	Niben101Scf01951g00023.1	397670	408880	402880	406320	419070	389320	419570	450870	430070	359510	391630	345420	375090	399540	423760	384590	398040	397470	419020	450700	436680	408620	463320	477460	381040	418260	417560	380330	419940	428790	511510	524730	531490	437130	399220	397940	318580	293890	303940	259340	248310	222100	211670	214360	243020	sp|Q39697|TBB2_DAUCA *-*- Tubulin beta-2 chain IPR000217 (Tubulin), IPR023123 (Tubulin, C-terminal) GO:0003924 (GTPase activity), GO:0005200 (structural constituent of cytoskeleton), GO:0005525 (GTP binding), GO:0005874 (microtubule), GO:0006184 (GTP catabolic process), GO:0007017 (microtubule-based process), GO:0043234 (protein complex), GO:0051258 (protein polymerization)
2	Niben101Scf00157g03004.1	188640	178570	169010	170740	206930	209420	185110	196250	231700	152530	163570	191310	112530	85111	113640	162590	177970	201390	217120	204360	192500	221060	228720	234460	220630	188780	172520	171910	184340	174740	184150	166560	187140	189760	164810	173550	147860	110140	135570	111860	86934	83249	164860	155350	124960	AT1G50900.1 ***- Ankyrin repeat family protein LENGTH=175 IPR020683 (Ankyrin repeat-containing domain)
2	Niben101Scf08516g03011.1	15599	21243	17433	18834	15035	12601	13440	10256	5286.6	21243	27065	26615	25252	26198	1877.8	30014	20722	23391	17806	2770.8	16308	12689	13615	15517	15171	17570	19554	17325	4575	15740	13338	14780	14080	2719.1	6621.1	8268.9	8800.4	10073	4272.6	17299	9984.4	4851.6	8739.7	7794.2	9618.2	gb|AES73591.2| ***- transmembrane protein, putative [Medicago truncatula]
2	Niben101Scf03015g06014.1	61003000	69628000	65943000	56490000	57058000	52641000	65201000	68217000	73585000	58295000	64627000	64100000	68173000	69262000	71574000	66650000	67780000	60623000	63430000	53674000	61941000	55297000	65802000	57336000	52745000	63982000	51751000	52925000	44005000	43958000	51601000	58702000	50807000	48431000	53645000	54160000	41754000	36917000	36135000	46344000	37935000	38057000	24215000	23899000	24903000	sp|P26573|RBS8_NICPL ***- Ribulose bisphosphate carboxylase small chain 8B, chloroplastic IPR000894 (Ribulose bisphosphate carboxylase small chain, domain), IPR024680 (Ribulose-1,5-bisphosphate carboxylase small subunit, N-terminal), IPR024681 (Ribulose bisphosphate carboxylase, small chain)
2	Niben101Scf07639g00001.1	552130	595600	510200	618940	616660	560430	433600	428000	413360	583560	528780	543910	469480	546690	549560	551260	509310	494740	535740	564360	478140	572940	605460	570410	472020	533980	537530	494930	472710	469110	485430	498140	498880	495620	460520	216820	294190	303440	323030	266830	295650	295070	318990	287940	181340	pdb|4BM5|A *-*- Chain A, Chloroplast Inner Membrane Protein Tic110
2	Niben101Scf05017g06019.1	4895500	4851900	4685300	5367100	5360700	5419600	5805100	5758200	5787700	5393100	5165400	5007100	5322400	5303300	5297100	5758000	5615900	5420000	3851400	3832500	3821200	4368100	4479700	4379800	4081900	4073100	4154100	3526300	3433700	3505100	3113200	3004200	3039300	3245200	3527400	3479700	1741700	1817200	1774000	1892300	1938300	1931100	1432800	1434100	1481700	sp|Q4V0I4|F16PA_XANC8 **** Fructose-1,6-bisphosphatase class 1 IPR000146 (Fructose-1,6-bisphosphatase class 1/Sedoheputulose-1,7-bisphosphatase) GO:0005975 (carbohydrate metabolic process), GO:0042132 (fructose 1,6-bisphosphate 1-phosphatase activity), GO:0042578 (phosphoric ester hydrolase activity)
2	Niben101Scf05270g01002.1	10636000	10730000	9922300	9636300	6795800	9313200	7761200	9362400	7887100	7970700	7670300	7544400	9280000	9231800	9582500	9128700	9193300	9050600	8606300	8448700	8476600	9627400	9467600	9458500	9094500	8834300	8826000	7498800	7489400	7413800	7487300	7312400	7303500	7895200	8230200	5767900	6206900	5772300	5993900	4997000	4999600	5008400	5034100	4989800	5460300	sp|Q9XEA8|CYSK2_ORYSJ **** Cysteine synthase IPR005856 (Cysteine synthase K/M) GO:0004124 (cysteine synthase activity), GO:0006535 (cysteine biosynthetic process from serine)
2	Niben101Scf04969g01002.1	5509300	5730400	5467200	5268800	5353700	4953400	4740800	4892900	4969800	4284400	4305900	3954100	5264500	5486500	5901400	4168400	4367600	4366200	3149300	3074000	3141500	3626200	3904600	4191600	3707500	3289400	3711100	2961300	2965200	3070600	3473500	3527600	3828100	3791300	3786600	3915700	3238600	2926900	2457900	2734800	2783000	2132500	2173700	2194600	2808700	sp|P04105|TBAN_PHYPO ***- Tubulin alpha-1B chain IPR000217 (Tubulin), IPR023123 (Tubulin, C-terminal) GO:0003924 (GTPase activity), GO:0005200 (structural constituent of cytoskeleton), GO:0005525 (GTP binding), GO:0005874 (microtubule), GO:0006184 (GTP catabolic process), GO:0007017 (microtubule-based process), GO:0043234 (protein complex), GO:0051258 (protein polymerization)
2	Niben101Scf03840g02006.1	615430	594560	616060	471510	458850	471580	929570	783330	808800	416480	431860	387710	1182300	1127700	1137600	389270	347590	347700	706130	698090	683860	306550	278540	332820	742160	649080	630750	390630	341550	391340	384900	361050	349280	491470	101400	240790	127020	178980	158120	255520	241080	304360	192610	184620	141160	sp|O84100|RS1_CHLTR *-*- 30S ribosomal protein S1 IPR000110 (Ribosomal protein S1) GO:0003676 (nucleic acid binding), GO:0003723 (RNA binding), GO:0003735 (structural constituent of ribosome), GO:0005840 (ribosome), GO:0006412 (translation)
2	Niben101Scf00797g18009.1	269830	319770	280050	245350	291980	267330	156200	198300	176790	223400	222460	220510	215540	239600	257450	221260	226110	216950	187320	186140	223370	117290	197150	134980	174670	232270	236300	110770	87811	113010	61828	102730	76860	80374	314010	131930	107840	150230	175060	175070	160010	173790	193580	33016	65897	sp|Q56YA5|SGAT_ARATH ***- Serine--glyoxylate aminotransferase IPR015424 (Pyridoxal phosphate-dependent transferase), IPR024169 (Serine-pyruvate aminotransferase/2-aminoethylphosphonate-pyruvate transaminase) GO:0003824 (catalytic activity), GO:0008152 (metabolic process), GO:0030170 (pyridoxal phosphate binding)
2	Niben101Scf06117g01005.1	282850	262700	276590	166560	171250	226610	194000	191510	183490	183540	223130	184860	201210	158120	143320	186010	148190	219470	235850	238570	219500	157150	165040	150210	261800	191690	115990	131350	159520	107030	104890	120170	113610	106170	123540	154480	170930	141720	104400	98526	123490	139600	95833	121840	99834	sp|Q9SDT1|POR_DAUCA **** Protochlorophyllide reductase, chloroplastic IPR002347 (Glucose/ribitol dehydrogenase) GO:0008152 (metabolic process), GO:0016491 (oxidoreductase activity), GO:0016630 (protochlorophyllide reductase activity), GO:0055114 (oxidation-reduction process)
2	Niben101Scf01826g07014.1	4870800	2895000	4339500	5255600	4872200	5186800	5105500	5261800	5094700	5589700	5040500	5404500	4879400	4272100	4304200	5919500	5965000	5420400	4398100	3316500	4360500	5008100	5049100	4949100	4160100	5019200	4877700	4160800	4215600	4191300	3831500	3848700	3859200	3848100	4499200	5070600	2943900	3374300	2945600	2889600	3357300	2697800	3233200	3261300	3408400	sp|Q94K71|GPPL2_ARATH **** Haloacid dehalogenase-like hydrolase domain-containing protein IPR006439 (HAD hydrolase, subfamily IA), IPR023214 (HAD-like domain) GO:0008152 (metabolic process), GO:0016787 (hydrolase activity)
2	Niben101Scf02891g04008.1	548850	509770	541090	643730	640520	649750	511400	571200	564320	632250	592230	572020	657300	638730	651380	536250	602290	559410	508800	506520	488360	525810	542560	507260	527510	538660	532660	473220	462470	457320	400450	460290	464230	471160	481370	544800	400010	398330	404190	370240	367040	416170	341180	365240	345840	sp|A6GZF3|SYP_FLAPJ **** Proline--tRNA ligase IPR002316 (Proline-tRNA ligase, class IIa), IPR017449 (Prolyl-tRNA synthetase, class II) GO:0000166 (nucleotide binding), GO:0004812 (aminoacyl-tRNA ligase activity), GO:0004827 (proline-tRNA ligase activity), GO:0005524 (ATP binding), GO:0005737 (cytoplasm), GO:0006418 (tRNA aminoacylation for protein translation), GO:0006433 (prolyl-tRNA aminoacylat…
2	Niben101Scf15372g00003.1	126860	79513	187380	208020	103700	162570	180350	106600	110660	185220	162630	177780	144720	151150	157170	80081	165390	90042	86591	91500	76469	42477	128810	152390	111590	133720	53139	135200	120890	32079	135400	111680	125220	43574	66085	78985	46307	58920	129960	54842	61783	59654	39592	46728	60539	AT4G09650.1 **** ATP synthase delta-subunit gene LENGTH=234 IPR000711 (ATPase, OSCP/delta subunit), IPR026015 (F1F0 ATP synthase OSCP/delta subunit, N-terminal domain) GO:0015986 (ATP synthesis coupled proton transport), GO:0016020 (membrane), GO:0046933 (proton-transporting ATP synthase activity, rotational mechanism)
2	Niben101Scf01434g01018.1	169750	203860	175310	215270	219820	199710	188420	168920	167360	166850	144270	159750	201040	193220	190390	156060	175430	177200	132320	142300	159400	180770	143440	151060	153010	181550	157580	141150	126880	137500	157180	147860	133090	166930	135720	195780	124380	105180	92813	100520	108020	123560	105760	205630	103480	sp|Q9NQW7|XPP1_HUMAN ***- Xaa-Pro aminopeptidase 1 IPR000994 (Peptidase M24, structural domain), IPR029149 (Creatinase/Aminopeptidase P/Spt16, N-terminal) GO:0016787 (hydrolase activity)
2	Niben101Scf00508g00007.1	1806400	2413400	2368000	2137900	1682900	1681600	1830800	2116800	1888600	1519800	1759600	1724800	1879900	2309500	1823900	2389300	1837200	2161500	1489900	1558700	1574300	2094600	2422400	2322400	1613600	1449600	1469100	1286800	1433600	1402800	1325200	1164500	1089100	1463100	1798700	1620900	1383100	1041200	1208800	1353000	1342700	1415300	1180000	1290800	1088800	sp|P00297|PLAS_SOLCR ***- Plastocyanin IPR001235 (Blue (type 1) copper protein, plastocyanin-type), IPR028871 (Blue (type 1) copper protein, binding site) GO:0005507 (copper ion binding), GO:0009055 (electron carrier activity)
2	Niben101Scf01970g01025.1	140880	237540	171260	151820	117430	88645	260210	257800	235140	182290	176480	174260	188590	201200	213870	151190	96663	175040	201130	200030	199340	131450	132060	143660	99781	100250	108800	153300	164450	184700	185880	186850	108880	185900	176420	140710	92799	84280	100360	116410	107080	135170	45738	58264	59956	sp|A8FNQ9|HIS1_CAMJ8 **** ATP phosphoribosyltransferase IPR001348 (ATP phosphoribosyltransferase HisG) GO:0000105 (histidine biosynthetic process), GO:0000287 (magnesium ion binding), GO:0003879 (ATP phosphoribosyltransferase activity), GO:0005737 (cytoplasm)
2	Niben101Scf00539g07027.1	2507200	2335600	2329800	1908400	1804900	1758800	1928800	1873900	1870300	1539900	1476200	1329800	2074500	2160100	2209000	1830000	1836200	1743600	1588400	1611300	1558700	2212600	2240700	2135900	1445600	1385700	1372700	1364400	1352600	1441800	1417700	1439700	1512800	1629300	1496500	1652300	1172500	1054700	1050000	1155200	1141300	1032900	1032700	1006400	1206000	sp|P35476|PLAS1_TOBAC ***- Plastocyanin A'/A'' IPR001235 (Blue (type 1) copper protein, plastocyanin-type), IPR028871 (Blue (type 1) copper protein, binding site) GO:0005507 (copper ion binding), GO:0009055 (electron carrier activity)
2	Niben101Scf01959g04001.1	2808000	2756500	2710500	2754000	2566200	2628600	2535200	2430300	2449700	2628800	2467400	2474000	1805400	1901500	1826300	2866300	2820100	2768200	2502000	2543600	2465000	1789700	1720100	1821900	2382200	2377100	2340400	1822400	1693100	1650800	1312600	1233400	1287000	1648900	1836100	2033200	1381200	941310	1199800	1162900	1153900	1187000	1333900	1331800	1116600	AT4G03520.1 *-*- Thioredoxin superfamily protein LENGTH=186 IPR005746 (Thioredoxin), IPR012336 (Thioredoxin-like fold) GO:0006662 (glycerol ether metabolic process), GO:0015035 (protein disulfide oxidoreductase activity), GO:0045454 (cell redox homeostasis)
2	Niben101Scf00490g01036.1	252880	262800	271810	233240	236880	221950	245360	309760	313820	263380	212600	239300	193480	280730	320860	242710	253760	223870	226620	226370	239670	128010	253480	226070	197960	217840	186150	169240	174760	165790	163900	170820	155540	184230	226830	229540	211250	154620	197770	178060	194580	200200	137950	144230	121950	AT4G22890.1 ***- PGR5-LIKE A LENGTH=324
2	Niben101Scf09178g01017.1	738060	354830	354450	411050	602010	278840	253900	258530	169720	437870	259700	613070	373440	362790	386450	330770	351470	351690	219660	234630	192490	513650	543630	431090	446030	285640	260450	410820	448060	446320	269350	435310	426880	65795	253030	250050	163270	174010	168380	212930	139040	237040	151230	124980	146830	sp|Q9EXP2|SUFS_DICD3 **** Cysteine desulfurase IPR010970 (Cysteine desulfurase, SufS), IPR015424 (Pyridoxal phosphate-dependent transferase) GO:0003824 (catalytic activity), GO:0006534 (cysteine metabolic process), GO:0008152 (metabolic process), GO:0030170 (pyridoxal phosphate binding), GO:0031071 (cysteine desulfurase activity)
2	Niben101Scf05449g00008.1	117550	98961	131260	136460	134380	161260	166870	159330	176650	125670	120360	113910	159970	148670	157030	139500	134040	126450	126620	117530	105040	109860	128330	124810	105340	106520	81882	86150	93445	91599	90177	96013	89470	106910	114010	116840	82727	60882	96923	60701	50940	66275	54409	66412	71474	sp|Q9JP87|CARA_RUBGI **** Carbamoyl-phosphate synthase small chain IPR006274 (Carbamoyl-phosphate synthase, small subunit), IPR029062 (Class I glutamine amidotransferase-like) GO:0006543 (glutamine catabolic process), GO:0070409 (carbamoyl phosphate biosynthetic process)
2	Niben101Scf01077g04012.1	194790	468570	182760	248480	216840	254500	454060	236900	262530	223380	185520	440130	163130	76594	408980	194510	314880	234870	154810	209220	169630	165210	153560	215780	252980	177290	188750	240570	232550	297640	165580	134700	159020	208090	216170	252970	166510	211760	228790	124510	131880	145610	135080	113990	161690	AT1G74040.1 ***- 2-isopropylmalate synthase 1 LENGTH=631 IPR013785 (Aldolase-type TIM barrel) GO:0003824 (catalytic activity), GO:0019752 (carboxylic acid metabolic process), GO:0046912 (transferase activity, transferring acyl groups, acyl groups converted into alkyl on transfer)
2	Niben101Scf12852g03012.1	1058500	1053700	994990	1119300	1088800	1086300	843180	687500	806810	996020	953560	928850	994670	951440	986640	1049900	1010300	949610	860650	883020	849510	868600	880710	879860	932570	898470	944350	860580	841840	832320	699500	666460	664560	742680	669350	779510	520660	574310	553490	756840	761980	762410	524920	523090	536530	ref|XP_002512588.1| --*- GRIP and coiled-coil domain-containing protein, putative [Ricinus communis] gb|EEF50040.1| GRIP and coiled-coil domain-containing protein, putative [Ricinus communis]
2	Niben101Scf02736g01008.1	5962700	5807700	5710200	6497300	6563900	6237500	7229800	7599100	7266400	6307600	5903100	5603200	6411200	6265500	6304500	6407700	6487100	6214400	5846800	5814500	5747800	6627900	6785900	6547900	5978100	6036700	5860000	5169700	4970300	4917100	4759800	4846700	4865500	5047200	5149200	5814600	3903800	3699400	3708400	3430100	3422100	3425000	3776900	3598800	3743600	sp|Q0ZJ13|ATPB_VITVI *-** ATP synthase subunit beta, chloroplastic IPR005722 (ATPase, F1 complex, beta subunit), IPR027417 (P-loop containing nucleoside triphosphate hydrolase) GO:0005524 (ATP binding), GO:0015986 (ATP synthesis coupled proton transport), GO:0015991 (ATP hydrolysis coupled proton transport), GO:0016820 (hydrolase activity, acting on acid anhydrides, catalyzing transmembrane movem…
2	Niben101Scf03737g02009.1	2511500	2564000	2462800	2489100	2482300	2457400	2521500	2579000	2626100	2515300	2467500	2345500	2023100	2007100	2104900	2646000	2799300	2733400	1984900	2074100	2031000	2111900	2253300	2189400	1878900	1858400	1890500	1911300	1895000	1910600	1622000	1637600	1686900	1811300	2196300	1919200	1598500	1318400	1357700	1382100	1352500	1476800	1315500	1277800	1322700	sp|P81834|TL16_SPIOL --*- Thylakoid lumenal 13.3 kDa protein
2	Niben101Scf04099g09005.1	1222900	1360500	575500	995510	1055500	991180	657760	536370	247980	466960	437960	899370	1255700	1261800	1336900	502450	1027800	1122500	1068700	1054000	1076700	485930	1038700	508230	971180	998890	981730	525610	875620	889060	495130	907870	914820	484730	591400	696610	245300	460150	248300	440650	488470	453790	518570	641500	304560	sp|P74518|LRTA_SYNY3 ***- Light-repressed protein A homolog IPR003489 (Ribosomal protein S30Ae/sigma 54 modulation protein) GO:0044238 (primary metabolic process)
2	Niben101Scf09712g00005.1	3845500	4174600	4070100	4179600	4294300	4159400	5123100	5081300	5207900	4398800	4233300	4375400	4187000	4335500	4572700	4117300	4492500	4482800	3573400	3682000	3813000	3334600	3226400	3394800	3254300	3778900	3513100	3238800	4122800	3826500	2271500	3116600	3427500	3478800	3882700	3652200	2735000	2448500	2458300	2400900	2759500	2687400	2251800	2564800	2456400	sp|A1W9H6|F16PA_ACISJ **** Fructose-1,6-bisphosphatase class 1 IPR000146 (Fructose-1,6-bisphosphatase class 1/Sedoheputulose-1,7-bisphosphatase) GO:0005975 (carbohydrate metabolic process), GO:0042132 (fructose 1,6-bisphosphate 1-phosphatase activity), GO:0042578 (phosphoric ester hydrolase activity)
2	Niben101Scf06556g07001.1	39705	56774	46097	94181	40764	58629	58855	45463	60102	76411	73896	60092	41423	69258	57958	50933	35191	58375	46010	45153	6171.4	56681	59585	61010	50720	34574	61522	53226	6625.5	63922	8526.9	58575	58025	50092	27717	43483	28107	42615	56690	52306	15782	15667	49263	6312.4	11721	sp|Q8CT13|ODP2_STAES ***- Dihydrolipoyllysine-residue acetyltransferase component of pyruvate dehydrogenase complex IPR015761 (Lipoamide Acyltransferase), IPR023213 (Chloramphenicol acetyltransferase-like domain) GO:0008152 (metabolic process), GO:0016746 (transferase activity, transferring acyl groups)
2	Niben101Scf15538g00001.1	21023	20518	23046	32242	34911	31532	29031	27402	34307	30465	27335	26824	37483	41473	17522	29573	31202	29105	9246.3	27335	29200	22608	31880	26005	26377	25041	28537	20425	17481	27272	22605	8212.7	24311	30050	32088	31590	22808	19489	15591	19142	16575	22841	10006	16312	15967	gb|ABD64919.1| ***- Lil3 protein, putative [Brassica oleracea] IPR023329 (Chlorophyll a/b binding protein domain)
2	Niben101Scf04804g01002.1	1728000	1651400	1548000	1445600	1410900	1372900	1141800	1110000	1135100	1500600	1439900	1428100	936710	935560	992770	1293600	1264200	1293500	879300	970360	961640	1277300	1289100	1225800	971160	947480	982720	473910	905960	899330	800890	883460	858490	902230	1170000	1004900	670050	561990	598050	787220	736240	753960	819580	843800	861500	sp|P93788|REMO_SOLTU ***- Remorin IPR005516 (Remorin, C-terminal), IPR005518 (Remorin, N-terminal)
2	Niben101Scf04236g00013.1	54602	56675	56795	63866	46315	59372	60553	54095	52379	56118	49127	45570	64637	46314	55450	49515	43016	44636	53234	50581	10293	67182	68879	56744	77439	72118	71307	48283	46725	32820	50057	42672	40120	49043	30648	55079	27926	24980	41238	37084	39218	39398	25725	21575	39555	AT3G14930.1 **** Uroporphyrinogen decarboxylase LENGTH=418 IPR006361 (Uroporphyrinogen decarboxylase HemE) GO:0004853 (uroporphyrinogen decarboxylase activity), GO:0006779 (porphyrin-containing compound biosynthetic process)
2	Niben101Scf08777g02002.1	316590	328590	399120	525000	505460	461170	514840	539980	419060	509880	471260	340490	364000	408680	407560	388770	272140	453940	302740	225470	323070	403790	387240	400800	331170	254970	326120	247940	303220	297430	291550	198310	255320	516230	373840	481770	244300	324100	262780	232250	173360	329330	272460	199450	301420	sp|Q8RXT9|GDL8_ARATH ***- GDSL esterase/lipase IPR013830 (SGNH hydrolase-type esterase domain) GO:0006629 (lipid metabolic process), GO:0016788 (hydrolase activity, acting on ester bonds)
2	Niben101Scf02442g00014.1	183170	180160	172200	211240	211730	220220	225950	104410	215230	163020	148210	153780	219100	177910	182580	165200	161700	166400	39519	153320	164720	167850	12296	153600	151190	146510	153950	88900	95154	93130	92835	97037	85976	147820	82406	113580	89080	95053	85742	53013	121210	151460	64030	113100	64363	AT1G62780.1 ***- unknown protein; FUNCTIONS IN: molecular_function unknown; INVOLVED IN: biological_process unknown; LOCATED IN: chloroplast, chloroplast stroma; EXPRESSED IN: 22 plant structures; EXPRESSED DURING: 14 growth stages; Has 94 Blast hits to 94 proteins in 35 species: Archae - 6; Bacteria - 10; Metazoa - 21; Fungi - 2; Plants - 48; Viruses - 0; Other Eukaryotes - 7 (source: NCBI BLink…
2	Niben101Scf06170g00010.1	245690	285380	255590	272080	320760	325700	304330	312200	343450	248100	289640	301170	263890	286420	287350	255620	256910	235090	216460	224330	223940	263520	261490	260680	236930	216930	253500	208480	203800	183880	217540	200370	201760	229600	245290	263350	169640	173510	174150	115250	185710	124040	155880	96790	116860	sp|Q9JID6|ACSL1_CAVPO ***- Long-chain-fatty-acid--CoA ligase 1 IPR000873 (AMP-dependent synthetase/ligase) GO:0003824 (catalytic activity), GO:0008152 (metabolic process)
2	Niben101Scf01469g01006.1	237710	176550	233220	275680	138110	270830	284940	245740	306520	243010	206210	195970	172290	226610	256090	192150	247950	325310	213480	182260	109110	241440	249630	246280	224140	203180	204640	231650	208590	212810	203290	196170	181160	228830	281140	250980	134820	102480	124230	89971	231340	177280	183340	106710	156330	AT4G37040.1 **** methionine aminopeptidase 1D LENGTH=350 IPR000994 (Peptidase M24, structural domain), IPR002467 (Peptidase M24A, methionine aminopeptidase, subfamily 1) GO:0004177 (aminopeptidase activity), GO:0006508 (proteolysis), GO:0008235 (metalloexopeptidase activity)
2	Niben101Scf09150g02003.1	135390	138710	144660	171490	82499	166540	182450	178190	184960	145230	136470	65693	155010	148720	153280	154700	74404	154680	164360	158970	150060	165570	176960	179710	152950	143360	151090	132170	58772	69226	155510	70409	66937	66889	30963	18930	59799	69661	145280	23689	49786	66131	54349	77376	53278	ref|WP_029344731.1| --*- dTDP-glucose 4,6-dehydratase [Lactococcus lactis]
2	Niben101Scf12017g05020.1	655910	650620	622580	649050	564510	621840	529770	682280	711610	661420	616690	605230	558380	597540	578700	715120	706040	701180	474840	476690	491640	573320	511570	536730	435200	472320	456540	340650	419670	401730	457300	450800	449440	435810	643870	456330	621130	408040	455980	331240	420120	416680	342200	361560	389970	sp|B3QT85|SYM_CHLT3 --** Methionine--tRNA ligase IPR012340 (Nucleic acid-binding, OB-fold) GO:0000049 (tRNA binding)
2	Niben101Scf05929g02002.1	206770	127690	128990	172980	202900	181140	152030	145110	140520	132350	227340	122920	162390	130020	139430	148410	149570	169270	204450	178850	185900	146800	205790	214890	196290	111730	130390	65352	60616	68642	66338	45721	72424	90298	70495	107290	42971	70746	40211	33615	60660	36133	21465	45365	47829	sp|Q5RC80|RBM39_PONAB *-** RNA-binding protein 39 IPR012677 (Nucleotide-binding alpha-beta plait domain) GO:0000166 (nucleotide binding), GO:0003676 (nucleic acid binding)
2	Niben101Scf02854g02005.1	291070	717650	199390	238140	232910	176920	288460	320890	321420	586730	166670	591020	196850	263530	749810	174060	230850	141730	225730	92750	185540	237460	215490	175960	128170	162800	193620	227910	240180	152960	141740	146120	148390	180180	201360	164070	226800	94649	225370	97491	144490	92995	87589	81341	98044	AT1G48480.1 **** receptor-like kinase 1 LENGTH=655 IPR001611 (Leucine-rich repeat), IPR011009 (Protein kinase-like domain), IPR013210 (Leucine-rich repeat-containing N-terminal, type 2) GO:0004672 (protein kinase activity), GO:0005515 (protein binding), GO:0005524 (ATP binding), GO:0006468 (protein phosphorylation), GO:0016772 (transferase activity, transferring phosphorus-containing groups)
2	Niben101Scf35412g00009.1	412050	396510	428060	618140	625700	627400	592600	585610	625450	569000	554150	605560	517750	496220	483440	500510	542800	523700	371840	377900	367500	368450	375520	376640	475810	462660	467470	367370	369870	383250	356240	363210	351320	236540	498140	444570	447950	295740	381980	312610	331840	308140	287190	273400	288930	AT1G65450.1 **** HXXXD-type acyl-transferase family protein LENGTH=450 IPR003480 (Transferase), IPR023213 (Chloramphenicol acetyltransferase-like domain) GO:0016747 (transferase activity, transferring acyl groups other than amino-acyl groups)
2	Niben101Scf06795g00001.1	76754	80261	76640	64894	77628	93984	83969	93695	95073	89245	67837	72330	61831	90785	74949	95076	87422	86673	83836	84149	67254	78209	83206	53330	63066	93207	54213	52659	59781	53904	67077	43710	68359	81486	85383	42199	28000	62488	43195	51042	55355	59582	48890	71174	61424	AT1G26761.1 ***- Arabinanase/levansucrase/invertase LENGTH=444 IPR007184 (Mannoside phosphorylase), IPR023296 (Glycosyl hydrolase, five-bladed beta-propellor domain)
2	Niben101Scf02413g01013.1	579590	321850	461310	567210	568660	357410	677000	692500	480640	571990	565240	512400	335010	549410	331130	532580	528510	467240	410070	396050	407280	520510	501220	498570	290440	437440	431070	320620	398660	441950	442680	306660	106640	311870	454990	238990	138870	144330	151510	373150	287640	260370	307920	139930	157070	sp|Q9FKM2|VDAC4_ARATH **** Mitochondrial outer membrane protein porin 4 IPR023614 (Porin domain), IPR027246 (Eukaryotic porin/Tom40) GO:0005741 (mitochondrial outer membrane), GO:0055085 (transmembrane transport)
2	Niben101Scf01460g04019.1	1127000	1060000	1050800	1124600	1165300	1117700	1184800	1389500	1372300	1141500	1104800	987560	1340400	1173300	1304100	1177100	1190000	1100800	922720	976450	1068200	1248000	1140800	1124800	996180	1023100	945200	918180	991770	965970	983630	951430	960640	985560	1083100	968740	898380	406540	741340	830970	743070	654760	644150	619990	694970	sp|A3MYM7|NQRF_ACTP2 *-** Na(+)-translocating NADH-quinone reductase subunit F IPR001221 (Phenol hydroxylase reductase) GO:0016491 (oxidoreductase activity), GO:0055114 (oxidation-reduction process)
2	Niben101Scf00635g00004.1	499140	502720	505810	418710	404040	441100	492660	497240	226400	584610	564720	558100	357500	360650	363790	580080	616020	633920	383360	456470	477260	563840	606030	532630	467750	488390	483140	463360	434620	455390	410350	373510	314680	439720	555870	490860	320150	347200	347990	251760	262080	259630	295220	297380	65569	emb|CDY53943.1| ***- BnaA02g36930D [Brassica napus]
2	Niben101Scf05820g01009.1	577560	576380	584490	701020	715450	695760	848670	908300	969460	563660	566470	552230	667860	679070	704620	651960	656340	674470	488140	498440	488150	527880	547900	537810	499620	504640	483710	428270	404380	400730	430420	409510	432530	425720	470330	493150	312100	286490	270010	277690	278700	276200	276090	288840	294710	sp|P0A3D0|FER_SYNEL ***- Ferredoxin-1 IPR010241 (Ferredoxin [2Fe-2S], plant), IPR012675 (Beta-grasp domain) GO:0009055 (electron carrier activity), GO:0022900 (electron transport chain), GO:0051536 (iron-sulfur cluster binding), GO:0051537 (2 iron, 2 sulfur cluster binding)
2	Niben101Scf00761g02006.1	123910	128810	116970	102930	136050	113880	83598	94137	109620	134290	126500	85786	80292	85706	87691	88036	95696	83930	97497	91070	83921	111390	100660	114350	136500	133860	131990	94126	68350	91148	119700	126100	113660	79736	108350	93789	80222	66054	73550	57314	55432	78413	78028	55638	84969	sp|Q8VXQ2|ALDH_CRAPL **** Aldehyde dehydrogenase IPR012394 (Aldehyde dehydrogenase NAD(P)-dependent), IPR016161 (Aldehyde/histidinol dehydrogenase) GO:0004030 (aldehyde dehydrogenase [NAD(P)+] activity), GO:0006081 (cellular aldehyde metabolic process), GO:0008152 (metabolic process), GO:0016491 (oxidoreductase activity), GO:0016620 (oxidoreductase activity, acting on the aldehyde or oxo group of…
2	Niben101Scf06180g00014.1	472690	481660	484960	492800	543020	492980	519210	700910	701950	560530	506030	534580	438400	416080	451220	574860	594480	572240	444710	429670	421570	447620	410030	444920	356340	350620	361730	350890	363400	402360	292360	349350	318370	352760	478580	413160	428520	277910	429230	230380	262320	220170	292400	286940	310120	sp|Q2SWT5|ISPF_BURTA **** 2-C-methyl-D-erythritol 2,4-cyclodiphosphate synthase IPR003526 (2-C-methyl-D-erythritol 2,4-cyclodiphosphate synthase) GO:0008685 (2-C-methyl-D-erythritol 2,4-cyclodiphosphate synthase activity), GO:0016114 (terpenoid biosynthetic process)
2	Niben101Scf25768g00011.1	91725	87604	95019	76084	98374	101850	120410	113520	106220	100810	89591	88004	98546	115550	127850	100610	101280	97207	58823	88498	88827	101890	56697	108440	88841	86988	62503	72894	70298	74056	77406	61524	77678	14231	86082	84303	71327	62502	98118	66923	45868	53255	47817	54834	47436	sp|B3H4F1|SP1L1_ARATH ***- Protein SPIRAL1-like 1
2	Niben101Scf02944g00006.1	23240000	25542000	24034000	26456000	21177000	25445000	26513000	26012000	26577000	21362000	25417000	25295000	26741000	27409000	28906000	25383000	26497000	25827000	23112000	23827000	22966000	20948000	20177000	20789000	23844000	23347000	23750000	19622000	19968000	20406000	19316000	18674000	18978000	17485000	19319000	18559000	15188000	13666000	11093000	11256000	13732000	14274000	14667000	14264000	14652000	sp|Q8DLP3|ATPA_THEEB *-** ATP synthase subunit alpha IPR000194 (ATPase, F1/V1/A1 complex, alpha/beta subunit, nucleotide-binding domain), IPR004100 (ATPase, F1 complex alpha/beta subunit, N-terminal domain), IPR023366 (ATP synthase subunit alpha-like domain), IPR027417 (P-loop containing nucleoside triphosphate hydrolase) GO:0005524 (ATP binding), GO:0015992 (proton transport), GO:0046034 (ATP me…
2	Niben101Scf02393g01014.1	576960	670450	96269	100390	518870	549400	557870	596110	492600	44989	495770	120290	520850	473370	482810	488860	489150	474560	353880	350610	339610	355040	442000	383780	342280	330030	37554	332830	378260	310170	357690	281120	348300	316650	409690	419990	268320	48293	279340	341170	321300	99215	231020	201240	262960	AT2G15620.1 **** nitrite reductase 1 LENGTH=586 IPR005117 (Nitrite/Sulfite reductase ferredoxin-like domain), IPR006067 (Nitrite/sulphite reductase 4Fe-4S domain) GO:0016491 (oxidoreductase activity), GO:0020037 (heme binding), GO:0051536 (iron-sulfur cluster binding), GO:0055114 (oxidation-reduction process)
2	Niben101Scf09555g00009.1	224720	276600	265310	240330	309820	290370	269180	264800	276220	234590	174550	218380	296990	365480	280210	259110	258250	240380	198880	219250	199930	184620	232090	233090	183770	219280	151380	152750	147710	171440	188680	201860	199510	171090	169870	152520	98165	106400	92296	147010	131950	178350	149210	100990	149310	sp|A2BVI1|TAL_PROM5 ***- Transaldolase IPR001585 (Transaldolase), IPR013785 (Aldolase-type TIM barrel) GO:0003824 (catalytic activity), GO:0005975 (carbohydrate metabolic process)
2	Niben101Scf01085g06007.1	49406	21252	44882	7027	27908	37569	26320	23902	23630	21057	25156	31939	36879	9865.5	9263.7	41575	35017	28597	11346	29094	27194	14294	10041	28704	16895	15070	22206	30192	38866	24154	22154	25488	23949	24786	29414	33285	11031	8050.1	11455	16241	21130	30168	21797	13618	14506	sp|Q2HBE7|DED1_CHAGB *-** ATP-dependent RNA helicase DED1 IPR001650 (Helicase, C-terminal), IPR014001 (Helicase superfamily 1/2, ATP-binding domain), IPR014014 (RNA helicase, DEAD-box type, Q motif), IPR027417 (P-loop containing nucleoside triphosphate hydrolase) GO:0003676 (nucleic acid binding), GO:0005524 (ATP binding)
2	Niben101Scf13203g00003.1	1124300	1160700	1159500	1131700	1248100	1265000	1240800	1181000	1156900	1442500	1400700	1375200	1007400	959350	972700	1318400	1277000	1296800	1295300	1306200	1210300	1261500	1111700	1177400	1195500	1098900	1080000	910690	840420	866650	671030	673750	632370	761910	833640	802830	910230	904140	904720	393010	443520	440630	762900	914400	858600	sp|Q42952|NLTP1_TOBAC **** Non-specific lipid-transfer protein 1 IPR000528 (Plant lipid transfer protein/Par allergen), IPR016140 (Bifunctional inhibitor/plant lipid transfer protein/seed storage helical domain) GO:0006869 (lipid transport), GO:0008289 (lipid binding)
2	Niben101Scf05071g00011.1	209890	174100	144640	76594	245040	207660	318530	330330	279420	208110	202030	185130	186780	237160	189670	141550	243650	253900	130860	141150	131560	188520	182970	174360	142600	132680	141280	122800	151730	138920	136840	136950	110060	130420	158790	166170	39734	232000	58709	104780	119440	26177	64991	72443	75060	sp|Q7NFI1|NDHO_GLOVI **** NAD(P)H-quinone oxidoreductase subunit O IPR020905 (NAD(P)H-quinone oxidoreductase subunit O) GO:0005886 (plasma membrane), GO:0016655 (oxidoreductase activity, acting on NAD(P)H, quinone or similar compound as acceptor), GO:0055114 (oxidation-reduction process)
2	Niben101Scf25930g00016.1	120810000	111090000	123430000	70475000	107030000	121450000	120210000	122370000	117550000	115320000	108650000	122760000	124670000	124790000	104250000	109710000	121920000	109020000	117760000	114590000	118500000	120030000	104120000	119660000	124990000	122080000	119280000	108020000	108530000	111900000	100070000	100020000	102670000	110770000	101520000	86689000	49388000	74081000	77522000	72879000	75458000	73689000	73357000	72682000	43282000	sp|Q49CC1|RBL_CUSSA *-** Ribulose bisphosphate carboxylase large chain IPR000685 (Ribulose bisphosphate carboxylase, large subunit, C-terminal), IPR017443 (Ribulose bisphosphate carboxylase, large subunit, ferrodoxin-like N-terminal) GO:0000287 (magnesium ion binding), GO:0015977 (carbon fixation), GO:0016984 (ribulose-bisphosphate carboxylase activity)
2	Niben101Scf01393g00001.1	245960	253730	235000	222470	71577	41096	56363	262140	276420	244070	226080	261470	252740	271690	275270	237580	244410	45501	209910	212060	213350	219010	27786	241170	179530	198430	211410	228460	62917	235630	224170	228590	209670	267110	81729	65498	55958	52716	189530	65931	44002	106750	26757	42231	49106	sp|Q6NQB7|B3GT7_ARATH **** Beta-1,3-galactosyltransferase 7 IPR002659 (Glycosyl transferase, family 31), IPR025298 (Domain of unknown function DUF4094) GO:0006486 (protein glycosylation), GO:0008378 (galactosyltransferase activity), GO:0016020 (membrane)
2	Niben101Scf04827g04017.1	82594	68964	71903	94519	98655	99184	77092	69799	82134	90206	59887	89241	85416	86323	82945	74832	71490	65538	71002	65469	63019	78527	84120	78063	55564	64255	66612	54678	18487	55030	60055	62131	65365	64210	77762	75128	60196	38733	47353	41131	37668	18355	51231	31839	54738	AT1G09310.1 ***- Protein of unknown function, DUF538 LENGTH=179 IPR007493 (Protein of unknown function DUF538)
2	Niben101Scf09456g00018.1	207770	198910	216790	232480	246030	234560	163060	310450	114970	200540	237890	187340	239010	227320	239800	185750	182060	196220	135520	105290	159300	175350	163320	189220	266420	95544	177380	248550	182120	289580	159860	173350	183150	155100	222770	160550	215210	103120	132840	108330	99377	76460	97451	106860	122280	gb|AAF14244.1|AF110228_1 *-*- nuclear RNA binding protein A [Spinacia oleracea] IPR006861 (Hyaluronan/mRNA-binding protein), IPR019084 (Stm1, N-terminal)
2	Niben101Scf00578g00008.1	96035	116210	112650	78238	75000	89453	102040	105800	115330	92793	97427	94947	103270	138880	119040	94893	87347	64920	88627	82195	100660	65933	112870	68118	106250	115370	111730	79334	66011	82498	133390	82238	79849	50877	52405	62409	21403	17272	106500	43015	68213	64500	47509	48707	35795	sp|Q9XFT3|PSBQ1_ARATH **** Oxygen-evolving enhancer protein 3-1, chloroplastic IPR008797 (Photosystem II PsbQ, oxygen evolving complex), IPR023222 (PsbQ-like domain) GO:0005509 (calcium ion binding), GO:0009523 (photosystem II), GO:0009654 (photosystem II oxygen evolving complex), GO:0015979 (photosynthesis), GO:0019898 (extrinsic component of membrane)
2	Niben101Scf05688g09016.1	167480	73200	22487	136420	58064	22561	78772	137770	199460	45032	138420	33472	123370	123730	57495	136150	36257	117570	75643	52904	57619	90377	35801	101350	82980	32526	87378	69301	27571	69848	26497	76813	62802	34942	91646	30295	41982	51140	44437	21912	55131	32892	45644	54687	18442	sp|Q67T82|FTSH2_SYMTH --*- ATP-dependent zinc metalloprotease FtsH 2
2	Niben101Scf03129g03013.1	10888	10763	19452	22865	13816	7443.3	12855	9364.5	19366	19429	10707	11340	17087	15831	18310	13368	11480	13428	8274.7	15922	11554	17480	15032	2552.1	17348	13092	4543.1	2628.9	12300	9074.7	10390	12823	14606	10543	7802.6	18904	13264	12911	4496.7	10971	8270.5	4622.3	3781	6617.4	6258.5	AT3G16060.1 **** ATP binding microtubule motor family protein LENGTH=684 IPR001752 (Kinesin motor domain), IPR027417 (P-loop containing nucleoside triphosphate hydrolase), IPR027640 (Kinesin-like protein) GO:0003777 (microtubule motor activity), GO:0005524 (ATP binding), GO:0005871 (kinesin complex), GO:0007018 (microtubule-based movement), GO:0008017 (microtubule binding)
2	Niben101Scf12987g00001.1	140710	137540	149310	141170	163000	154080	162400	174630	185080	188960	158670	163110	159030	166250	214780	166340	170820	162930	130110	89934	126660	146440	149950	178450	97378	111210	122270	120840	118760	125560	103170	93957	144250	111260	129690	117120	108680	78363	88598	103980	97786	93037	78567	76991	81542	AT5G07020.1 ***- proline-rich family protein LENGTH=235
2	Niben101Scf00457g03011.1	25531	12684	29162	32309	24934	33799	20770	25831	21350	29254	27995	30416	17904	24079	26803	31470	36917	29400	50142	42438	47328	17573	30481	28798	33081	30582	3090.5	24715	22711	20391	3083.3	24461	18212	19752	28287	25370	6714	3369.8	22507	4416.9	6196.8	23774	8231.2	4503.7	7494.2	sp|P08451|FER2_SYNP6 ***- Ferredoxin-2 IPR012675 (Beta-grasp domain) GO:0009055 (electron carrier activity), GO:0051536 (iron-sulfur cluster binding)
2	Niben101Scf06509g05011.1	184870	30919	151630	152690	122600	40349	122830	22743	116650	19898	112000	74544	73465	84509	59115	125380	130030	44716	79945	89063	93786	106610	27401	86500	111990	92563	87993	57113	54263	25109	38439	58000	52530	46452	30252	48365	28828	61439	45240	73548	10529	27629	33848	21937	44737	sp|Q93ZY3|STT3A_ARATH ***- Dolichyl-diphosphooligosaccharide--protein glycosyltransferase subunit STT3A IPR003674 (Oligosaccharyl transferase, STT3 subunit) GO:0004576 (oligosaccharyl transferase activity), GO:0006486 (protein glycosylation), GO:0016020 (membrane)
2	Niben101Scf03281g01014.1	112330	166220	142670	34609	85472	113140	134870	193520	234840	155660	144160	138000	175770	190990	179980	148580	149150	146220	110670	111960	117730	148540	142790	109470	125700	110180	107920	125590	131040	112590	130040	133190	134010	141360	110640	32405	120450	116550	99410	75069	79424	95061	38160	26499	65555	sp|Q3KKE0|HEM6_PSEPF **** Oxygen-dependent coproporphyrinogen-III oxidase IPR001260 (Coproporphyrinogen III oxidase, aerobic) GO:0004109 (coproporphyrinogen oxidase activity), GO:0006779 (porphyrin-containing compound biosynthetic process), GO:0055114 (oxidation-reduction process)
2	Niben101Scf01728g00004.1	190990	177440	174110	147280	173920	136520	112280	144790	90729	71926	90787	105860	197440	220420	119680	121260	117480	158210	88463	68150	67577	97240	69380	104930	125590	121880	128680	106210	81066	68880	67822	62381	75815	110910	90960	94850	72184	56402	83721	53217	67810	57645	16483	27654	97775	sp|A7FD67|HEM3_YERP3 ***- Porphobilinogen deaminase IPR000860 (Tetrapyrrole biosynthesis, hydroxymethylbilane synthase) GO:0004418 (hydroxymethylbilane synthase activity), GO:0018160 (peptidyl-pyrromethane cofactor linkage), GO:0033014 (tetrapyrrole biosynthetic process)
2	Niben101Scf13360g00001.1	103280	113170	98220	108950	112350	94859	83812	83629	76249	74925	71906	70282	101430	104650	107400	70615	70171	65328	59621	59995	56452	50281	57751	56143	71516	73421	76064	49516	41662	45365	37881	9391.8	3036.7	16604	50654	21749	42921	28243	23193	31895	21585	47746	29411	24752	19555	emb|CDX96071.1| ***- BnaA07g26600D [Brassica napus]
2	Niben101Scf12045g06022.1	66146	87890	79280	73517	60028	94646	252690	80625	263640	55171	72603	183280	77862	67194	68044	48747	27147	162660	152270	146360	160960	186750	74673	35857	51674	50205	61006	154880	40337	52883	44848	164500	42272	164920	103080	206530	18875	53540	51668	41552	35213	22389	7601.5	35443	57847	gb|KGD89813.1| ***- FAD-dependent oxidoreductase [Pseudomonas sp. YS-1p]
2	Niben101Scf13622g01006.1	38387	44046	25929	26712	46492	47260	41108	51518	45810	37450	36341	40708	40417	38893	46396	40280	45084	22376	33558	33218	37240	35867	40986	40050	28789	32796	32702	28821	28902	19472	24907	7539.9	13557	19547	47703	31118	26849	11113	15206	12963	35603	33598	27754	28240	27777	gb|ADL36873.1| *-*- At1g62390-like protein [Arabidopsis lyrata subsp. lyrata] IPR000270 (Phox/Bem1p), IPR011990 (Tetratricopeptide-like helical domain) GO:0005515 (protein binding)
2	Niben101Scf00057g00027.1	707470	669630	652410	473530	440710	482340	566250	627820	570850	471430	456220	409170	650710	550650	611980	657680	623530	563040	386170	440960	394040	588490	586420	601160	350880	350090	348190	335570	389970	351790	384650	374020	352610	506130	560570	442930	375350	249740	301300	476120	464730	431150	302830	322840	295620	sp|P00297|PLAS_SOLCR ***- Plastocyanin IPR001235 (Blue (type 1) copper protein, plastocyanin-type), IPR028871 (Blue (type 1) copper protein, binding site) GO:0005507 (copper ion binding), GO:0009055 (electron carrier activity)
2	Niben101Scf00109g05011.1	82623	45290	100880	72444	31704	88608	69229	41706	42475	28792	84304	20767	31914	34904	116340	19346	85248	89533	71310	25200	78616	27092	36014	19554	35989	45980	31307	13664	49816	24898	22188	51239	39636	22006	32831	67393	46703	23982	16170	30315	26908	21041	26625	13818	41572	AT4G14605.1 **** Mitochondrial transcription termination factor family protein LENGTH=493 IPR003690 (Mitochodrial transcription termination factor) GO:0003690 (double-stranded DNA binding), GO:0005739 (mitochondrion), GO:0006355 (regulation of transcription, DNA-templated)
2	Niben101Scf09760g01005.1	12135	15236	14589	17702	9525	1884.5	2873.4	18629	21239	14421	11595	13296	3930.9	10343	15610	11680	14591	11380	11511	10752	11342	10364	10356	8538.1	5578.7	10971	10979	9580.2	2966.6	1872.8	9834.6	11818	4170.3	7919.8	4041.9	1974.1	3029.3	1745.1	12664	9410.7	1580	3768.3	1523.9	10035	11330	AT5G06130.2 *-*- chaperone protein dnaJ-related LENGTH=315 IPR001305 (Heat shock protein DnaJ, cysteine-rich domain) GO:0031072 (heat shock protein binding), GO:0051082 (unfolded protein binding)
2	Niben101Scf28780g01004.1	57634	59022	58874	68715	76143	44597	82251	69326	60071	61539	59448	49705	58144	55739	54963	18980	49035	73557	15830	73751	87475	66583	63317	72410	63091	68680	63627	71350	15860	59681	64119	67878	74770	34213	14428	16314	31239	42579	20030	29322	51127	57584	23330	26375	13314	sp|Q5QA74|RPOA_ACOGR *-** DNA-directed RNA polymerase subunit alpha IPR009025 (DNA-directed RNA polymerase, RBP11-like dimerisation domain), IPR011262 (DNA-directed RNA polymerase, insert domain), IPR013210 (Leucine-rich repeat-containing N-terminal, type 2) GO:0003899 (DNA-directed RNA polymerase activity), GO:0006351 (transcription, DNA-templated), GO:0046983 (protein dimerization activity)
2	Niben101Scf14516g00010.1	27803000	25770000	25756000	26262000	25116000	97179	17340000	13745000	13964000	26537000	23780000	23549000	24695000	24462000	23845000	106750	24625000	23534000	22967000	22714000	21660000	20200000	20503000	19516000	22152000	21132000	21199000	20777000	19768000	20114000	19367000	18474000	18432000	22882000	17219000	18467000	21969	106310	28927	20610000	20529000	20951000	101820	128380	67490	sp|Q85AC9|PSBD_ANTFO *-** Photosystem II D2 protein IPR000484 (Photosynthetic reaction centre, L/M) GO:0009772 (photosynthetic electron transport in photosystem II), GO:0019684 (photosynthesis, light reaction), GO:0045156 (electron transporter, transferring electrons within the cyclic electron transport pathway of photosynthesis activity)
2	Niben101Scf13856g00013.1	41300	46557	45604	10551	31600	12101	43448	39856	15038	42225	14937	30952	23616	29613	21587	25281	39465	27222	34533	11504	25746	24624	20802	19607	19770	6579.7	10346	6927.7	7504	17004	31520	31715	7554.8	11859	43196	34731	8814.9	13847	6805.6	5077.6	13341	23602	12138	12886	20400	sp|Q84MB3|ACCH1_ARATH ***- 1-aminocyclopropane-1-carboxylate oxidase homolog 1 IPR005123 (Oxoglutarate/iron-dependent dioxygenase), IPR026992 (Non-haem dioxygenase N-terminal domain), IPR027443 (Isopenicillin N synthase-like) GO:0016491 (oxidoreductase activity), GO:0016706 (oxidoreductase activity, acting on paired donors, with incorporation or reduction of molecular oxygen, 2-oxoglutarate as on…
2	Niben101Scf06387g00008.1	33041	55763	7462	56710	45349	60046	59100	64403	54015	52533	22635	22426	33425	59865	69044	34618	39624	46038	37072	39763	39550	33406	27006	31668	50466	26595	33419	33398	30636	34013	30688	4418.8	47489	34308	46695	51691	15905	39417	38465	20099	14188	19831	28725	22692	26729	sp|P40267|H1_SOLPN *-*- Histone H1 IPR011991 (Winged helix-turn-helix DNA-binding domain), IPR020478 (AT hook-like) GO:0000785 (chromatin), GO:0000786 (nucleosome), GO:0003677 (DNA binding), GO:0005634 (nucleus), GO:0006334 (nucleosome assembly), GO:0006355 (regulation of transcription, DNA-templated)
2	Niben101Scf00879g05002.1	670940	650530	608190	846020	911930	831770	695140	676210	648510	655740	632180	594490	697910	678100	686630	727800	726690	724240	684570	685080	718870	249880	218180	521520	701840	670160	586210	334370	358750	563620	236160	276680	263130	595780	502550	668170	440800	364060	447170	387970	229880	263220	421990	275920	279450	sp|P74367|PSB27_SYNY3 **** Photosystem II lipoprotein Psb27 IPR025585 (Photosystem II Pbs27) GO:0010207 (photosystem II assembly)
2	Niben101Scf02576g00011.1	1013000	1069800	991370	1020800	901560	786300	404830	298520	306660	761800	728160	741010	512090	526210	544050	754180	752310	770060	536040	575540	553560	373130	389480	385350	536270	536710	565490	506870	529070	511690	492150	533780	490080	515210	385530	598850	155850	389220	325460	491250	491110	524520	381380	382830	390560	AT2G37180.1 ***- Aquaporin-like superfamily protein LENGTH=285 IPR000425 (Major intrinsic protein), IPR023271 (Aquaporin-like) GO:0005215 (transporter activity), GO:0006810 (transport), GO:0016020 (membrane)
2	Niben101Scf09638g00009.1	24215	39116	10054	31680	32395	42441	51965	53078	43879	45120	35401	55820	27277	34504	37188	36846	36174	34823	32252	21364	27290	33939	26804	27942	33735	30687	27075	8654.1	31372	24323	15545	27539	23750	26089	35151	38530	14220	7202.7	16240	13658	23509	20317	17567	14954	25312	AT4G19120.1 ***- S-adenosyl-L-methionine-dependent methyltransferases superfamily protein LENGTH=600 IPR004159 (Putative S-adenosyl-L-methionine-dependent methyltransferase), IPR029063 (S-adenosyl-L-methionine-dependent methyltransferase) GO:0008168 (methyltransferase activity)
2	Niben101Scf01451g04016.1	79211	71646	80988	69552	68890	68711	18010	79114	88801	55302	62961	50714	82403	82549	75461	51990	59730	55697	44056	42800	39206	64543	43077	37916	55216	49204	50657	43176	29498	25500	18839	5382.5	15596	6640.2	49209	7580	28630	8812.1	10763	13188	14510	23302	14026	9092.8	4912.3	ref|WP_009632881.1| --*- Protein of unknown function (DUF2996) [Synechocystis sp. PCC 7509] IPR021374 (Protein of unknown function DUF2996)
2	Niben101Scf04249g01001.1	2599.6	2865.6	5075.2	7350.3	1692.5	3701.1	8372.4	1142.1	12394	17487	1952	14221	38648	36178	2707.6	5990.1	18360	2364.4	3199.1	11882	10933	11469	6548.6	2770.6	15358	4531.8	5357.3	3020.8	9945.3	10673	9750.7	5221.4	12302	16629	3081.3	4999.6	11305	2892	12608	8948.1	982.34	3442.5	2441.4	1901.7	943.3	AT3G13460.1 ***- evolutionarily conserved C-terminal region 2 LENGTH=667 IPR007275 (YTH domain)
2	Niben101Scf04514g02026.1	149140	156230	146240	140920	144150	133220	215750	58264	204470	147080	141620	153090	25297	230400	142400	139600	155920	156060	87774	97530	25018	229020	116430	202050	178740	12086	185550	13337	113470	10337	11226	126170	100720	114820	122910	108740	61979	55827	54564	57504	66855	65362	48001	46655	21100	gb|AIU50811.1| ***- AT1G65230-like protein, partial [Solanum tuberosum] IPR018790 (Protein of unknown function DUF2358)
2	Niben101Scf10556g00024.1	140710	137540	149310	141170	163000	154080	162400	174630	185080	162140	158670	163110	159030	166250	155980	166340	170820	162930	130110	89934	112120	146440	149950	178450	98372	111210	122270	119200	118760	126920	178080	93957	144250	107770	129690	93061	108680	78363	88598	103980	97786	93037	78567	76991	81542	AT5G07020.1 ***- proline-rich family protein LENGTH=235
2	Niben101Scf06864g00011.1	76675	82334	73119	86660	85139	81485	91050	87344	108530	85783	88243	78310	67618	69672	73098	85317	93434	84957	86640	82692	85241	109630	94889	108700	90885	97353	3843	94062	88890	88970	84946	9948.9	90627	85554	71741	73701	62311	53391	54792	62270	2322.2	62880	73948	64756	48834	sp|A8LYC4|TRPD_SALAI **** Anthranilate phosphoribosyltransferase IPR005940 (Anthranilate phosphoribosyl transferase) GO:0000162 (tryptophan biosynthetic process), GO:0004048 (anthranilate phosphoribosyltransferase activity), GO:0008152 (metabolic process), GO:0016757 (transferase activity, transferring glycosyl groups)
2	Niben101Scf11383g02021.1	61809	73407	58223	60441	61345	66857	72067	62500	75311	60300	54780	58258	63851	74895	65565	44581	49827	43472	50437	51523	50742	52102	52083	46052	55441	49873	52530	53945	53581	32442	55908	58497	52475	55217	57736	57665	9264.7	17852	5553.6	42672	35510	38300	41700	34324	40332	sp|Q0G9M9|RPOC2_LIRTU *-** DNA-directed RNA polymerase subunit beta'' IPR001865 (Ribosomal protein S2), IPR007081 (RNA polymerase Rpb1, domain 5) GO:0003677 (DNA binding), GO:0003735 (structural constituent of ribosome), GO:0003899 (DNA-directed RNA polymerase activity), GO:0005622 (intracellular), GO:0005840 (ribosome), GO:0006351 (transcription, DNA-templated), GO:0006412 (translation)
2	Niben101Scf10541g00018.1	33983	34182	30575	34947	10626	36213	29904	23486	23987	41023	44263	37355	31685	27117	34867	7938.1	23470	23261	20781	48506	18309	32748	33107	29236	27701	23290	42635	24461	39574	24964	25676	23366	21630	22916	29191	30225	18604	18446	16009	19161	18076	17012	15612	14411	16981	sp|Q1JPL7|PME18_ARATH **** Pectinesterase/pectinesterase inhibitor 18 IPR006501 (Pectinesterase inhibitor domain), IPR011050 (Pectin lyase fold/virulence factor) GO:0004857 (enzyme inhibitor activity), GO:0005618 (cell wall), GO:0030599 (pectinesterase activity), GO:0042545 (cell wall modification)
3	Niben101Scf09107g01004.1	301800	381850	383830	421400	421930	405290	411370	436920	377470	289300	216300	259750	279430	305570	299540	295650	271880	247100	213230	272840	250760	259010	282200	281300	295590	268270	291800	261240	264930	271290	300680	250470	271370	218920	308940	277910	270810	280050	272680	241350	292350	290840	157730	212100	225480	sp|Q9LIB2|PHS1_ARATH *-** Alpha-glucan phosphorylase 1 IPR000811 (Glycosyl transferase, family 35) GO:0005975 (carbohydrate metabolic process), GO:0008184 (glycogen phosphorylase activity)
3	Niben101Scf08142g00002.1	43106	41941	41288	18724	40364	27541	26600	31615	26026	16144	18190	9007.1	28472	12575	18121	16913	19996	17060	25229	20767	23124	19503	3705.7	16674	8947.8	22772	24220	18346	11431	18640	23652	18836	25253	22871	24696	28118	28947	21654	22347	7896.3	27334	13172	25810	23615	25568	sp|A8FRU0|MDH_SHESH **** Malate dehydrogenase IPR001557 (L-lactate/malate dehydrogenase) GO:0003824 (catalytic activity), GO:0005975 (carbohydrate metabolic process), GO:0006108 (malate metabolic process), GO:0016491 (oxidoreductase activity), GO:0016615 (malate dehydrogenase activity), GO:0016616 (oxidoreductase activity, acting on the CH-OH group of donors, NAD or NADP as acceptor), GO:0030060 …
3	Niben101Scf07449g00006.1	88846	87283	76131	133800	147530	135850	112690	94104	100490	77689	63201	73962	97116	90903	93950	80765	75026	58786	81015	73293	68038	29374	31960	33872	63054	74121	73100	45707	49161	45325	30048	56957	59138	26672	170930	72194	99104	79613	54270	82113	31205	39202	57728	34798	55771	sp|Q8SRB0|GBLP_ENCCU **** Guanine nucleotide-binding protein subunit beta-like protein IPR015943 (WD40/YVTN repeat-like-containing domain), IPR020472 (G-protein beta WD-40 repeat) GO:0005515 (protein binding)
3	Niben101Scf00539g07015.1	113140	116770	154640	156310	203550	199420	108260	109790	121610	79221	84363	83206	61192	56310	70689	95785	95316	106870	95674	100050	93346	91403	93790	101180	92695	90887	83693	66407	67913	63385	62341	64927	67738	77315	77563	81278	85692	67440	77521	72102	73770	82982	66423	67872	74276	sp|Q42403|TRXH3_ARATH *-*- Thioredoxin H3 IPR005746 (Thioredoxin), IPR012336 (Thioredoxin-like fold) GO:0006662 (glycerol ether metabolic process), GO:0015035 (protein disulfide oxidoreductase activity), GO:0045454 (cell redox homeostasis)
3	Niben101Scf11895g03018.1	78382	75662	85696	69423	100840	90504	88103	85060	80772	65415	53141	57945	14311	71106	72504	66409	68328	71836	64052	67456	57834	75290	81184	79027	54661	15055	11888	10176	46506	46401	70506	67659	68297	44243	57586	40505	58762	86691	60375	90820	63868	29153	46894	56735	60572	sp|B2HNG6|TIG_MYCMM *-*- Trigger factor IPR005215 (Trigger factor), IPR027304 (Trigger factor/SurA domain) GO:0006457 (protein folding), GO:0015031 (protein transport)
3	Niben101Scf00419g01007.1	141780	127160	145640	129970	150110	142810	169840	166630	222670	102470	100740	84264	134510	123500	136520	99008	77243	92043	63870	67647	76669	68415	59913	66409	61265	71907	92768	52126	56430	53821	59089	66119	63494	66559	79788	131930	75630	105650	130390	78258	80951	53600	47917	44824	60565	sp|A9WSU3|RL6_RENSM ***- 50S ribosomal protein L6 IPR000702 (Ribosomal protein L6) GO:0003735 (structural constituent of ribosome), GO:0005622 (intracellular), GO:0005840 (ribosome), GO:0006412 (translation), GO:0019843 (rRNA binding)
3	Niben101Scf04386g04007.1	1002600	928640	977050	1074400	822310	854140	903610	837330	851010	613030	568000	486510	681410	689360	569570	439180	476730	417450	428480	447980	457490	415620	514280	478430	373890	404330	510910	745710	567900	417330	562520	350400	548310	333160	393850	425150	411520	403950	424970	316410	680220	308760	380010	411460	382860	AT4G08850.1 *-*- Leucine-rich repeat receptor-like protein kinase family protein LENGTH=1045 IPR001611 (Leucine-rich repeat), IPR013210 (Leucine-rich repeat-containing N-terminal, type 2) GO:0005515 (protein binding)
3	Niben101Scf03254g00001.1	308130	302350	279100	368290	376790	375450	327510	356490	373570	253820	231950	236650	274380	288390	277100	171840	265860	259910	204080	217910	202530	243910	241410	230490	204740	197350	209020	178080	174400	171240	206440	203790	205850	188430	301330	218140	288950	217590	218340	127670	193880	207200	207450	199950	221030	sp|Q1RJT3|ODP2_RICBR ***- Dihydrolipoyllysine-residue acetyltransferase component of pyruvate dehydrogenase complex IPR000089 (Biotin/lipoyl attachment), IPR001078 (2-oxoacid dehydrogenase acyltransferase, catalytic domain), IPR004167 (E3-binding domain), IPR023213 (Chloramphenicol acetyltransferase-like domain) GO:0008152 (metabolic process), GO:0016746 (transferase activity, transferring acyl g…
3	Niben101Scf10002g00006.1	316200	362510	344050	384670	436500	431960	438960	403040	444940	154730	180700	192280	347990	328610	450060	183930	226880	172920	279260	127830	152690	288230	281270	232110	204070	288140	286250	320480	269920	194620	158190	396040	207010	241720	184360	319120	127680	243900	382580	195030	287940	224600	137580	178660	197980	sp|A4J136|RS13_DESRM ***- 30S ribosomal protein S13 IPR001892 (Ribosomal protein S13), IPR010979 (Ribosomal protein S13-like, H2TH), IPR027437 (30s ribosomal protein S13, C-terminal) GO:0003676 (nucleic acid binding), GO:0003723 (RNA binding), GO:0003735 (structural constituent of ribosome), GO:0005622 (intracellular), GO:0005840 (ribosome), GO:0006412 (translation)
3	Niben101Scf02264g05017.1	374390	421810	371930	399990	470860	430910	377260	427190	488040	241420	242700	218560	210180	218410	175490	176950	207190	202110	148370	188320	156320	136910	137470	137900	158180	144140	128950	168740	169160	148540	110100	83470	83347	143010	112670	157120	117660	120450	165320	129230	170710	187690	111460	78567	71919	sp|Q9LMM0|GPAT4_ARATH ***- Glycerol-3-phosphate 2-O-acyltransferase 4 IPR002123 (Phospholipid/glycerol acyltransferase), IPR023214 (HAD-like domain) GO:0008152 (metabolic process), GO:0016746 (transferase activity, transferring acyl groups)
3	Niben101Scf01396g05008.1	682840	718910	616610	629380	706860	694560	719980	719540	737930	468230	495650	456440	504850	515190	513200	321020	355670	332290	426060	359820	443410	263120	278810	256880	363420	288980	277730	294650	324040	319650	260760	289770	293170	225720	494580	460880	310860	350910	354410	353270	371370	377690	267150	355770	359260	ref|NP_001053188.1| ***- product [Oryza sativa Japonica Group] IPR006946 (Protein of unknown function DUF642), IPR008979 (Galactose-binding domain-like)
3	Niben101Scf08670g00031.1	397930	413750	186830	435380	475670	495350	472870	466400	525770	297280	211870	226470	471550	232590	299370	334050	190410	198680	196560	299190	174430	306150	107360	67341	152030	37590	147490	264360	75653	261720	126910	259760	258770	241430	443380	490940	191040	401890	101750	149780	163880	430090	371980	167270	427480	sp|Q038T2|ERA_LACC3 ***- GTPase Era IPR005225 (Small GTP-binding protein domain), IPR005662 (GTP-binding protein Era), IPR015946 (K homology domain-like, alpha/beta), IPR027417 (P-loop containing nucleoside triphosphate hydrolase) GO:0003723 (RNA binding), GO:0005525 (GTP binding), GO:0005622 (intracellular)
3	Niben101Scf00594g02002.1	235600	295250	256810	246220	233060	232770	224460	220830	216130	110640	128370	128850	145690	157610	91833	115960	125780	122910	110870	129670	86357	119950	109030	132120	124060	92667	129810	56396	160680	113470	108610	125750	133390	100150	101170	142140	141020	125950	150600	110410	92654	95250	151650	76110	90600	sp|Q43011|ASNS2_ORYSJ *-*- Asparagine synthetase [glutamine-hydrolyzing] 2 IPR024286 (Domain of unknown function DUF3700), IPR029055 (Nucleophile aminohydrolases, N-terminal)
3	Niben101Scf08566g01006.1	405700	484950	456550	447140	454130	476120	376610	432630	450560	338140	331620	306530	350330	359470	338090	363240	337920	291100	191170	241400	281180	343910	345980	278910	320300	295410	282200	305630	237130	301540	193890	313450	304920	278920	360680	358700	242830	258500	310120	345790	250120	329490	413670	345430	323950	sp|Q9KWS6|DNAJ_GEOTM ***- Chaperone protein DnaJ IPR012724 (Chaperone DnaJ) GO:0005524 (ATP binding), GO:0006457 (protein folding), GO:0009408 (response to heat), GO:0031072 (heat shock protein binding), GO:0051082 (unfolded protein binding)
3	Niben101Scf00841g02021.1	2418100	2522400	2254000	2485500	2530000	2495000	2503500	2666700	2740100	2100700	2092500	2140800	1487600	1622300	1615800	1989000	2433500	2158900	1703200	1744000	1683100	1486000	1525200	1542000	1278900	1460700	1383400	1433500	1506600	1537300	1586800	1511400	1503700	1600000	2256600	1884000	2315500	1739400	1879500	1603700	1660600	1805900	1557200	1571800	1843700	AT1G73190.1 ***- Aquaporin-like superfamily protein LENGTH=268 IPR000425 (Major intrinsic protein), IPR023271 (Aquaporin-like) GO:0005215 (transporter activity), GO:0006810 (transport), GO:0016020 (membrane)
3	Niben101Scf12708g02028.1	266780	230920	281410	234400	235920	266790	248760	225260	342230	192080	184800	163710	165840	195540	213840	174300	156830	156930	187770	191280	209480	223320	216980	216170	197830	200390	164750	148880	182820	173890	149530	182810	141530	137250	131740	184120	355480	178410	265420	164260	150240	198840	274970	159940	224240	sp|Q8RHK3|SYV_FUSNN **** Valine--tRNA ligase IPR002303 (Valine-tRNA ligase), IPR009080 (Aminoacyl-tRNA synthetase, class 1a, anticodon-binding), IPR010978 (tRNA-binding arm) GO:0000166 (nucleotide binding), GO:0002161 (aminoacyl-tRNA editing activity), GO:0004812 (aminoacyl-tRNA ligase activity), GO:0004832 (valine-tRNA ligase activity), GO:0005524 (ATP binding), GO:0005737 (cytoplasm), GO:000641…
3	Niben101Scf05211g01005.1	37381	41952	40315	43467	43937	39357	55155	51560	49120	25140	31492	27141	30402	31082	2471.2	28535	26205	25660	13791	14579	12853	11368	5461	7394.9	14324	14159	10260	6543.5	8158.4	4941.5	10998	10814	9156	6139.4	15433	15758	26101	19234	20840	21036	17475	23218	4920.1	5382.2	1869.3	sp|Q5HRM8|CLPC_STAEQ *-*- ATP-dependent Clp protease ATP-binding subunit ClpC IPR004176 (Clp, N-terminal), IPR023150 (Double Clp-N motif) GO:0019538 (protein metabolic process)
3	Niben101Scf07937g03024.1	184110	205750	276330	305790	177700	197790	389650	199530	339650	193400	146710	124180	213590	127920	142420	182460	177350	144680	168630	109400	188940	155990	196350	155240	156170	165310	185660	151870	157540	176560	154260	184030	144140	138270	171310	152770	167060	152530	196230	125260	100190	86087	136700	153050	152330	sp|Q9ZVD5|AGO4_ARATH ***- Protein argonaute 4 IPR003100 (PAZ domain), IPR012337 (Ribonuclease H-like domain), IPR014811 (Domain of unknown function DUF1785) GO:0003676 (nucleic acid binding), GO:0005515 (protein binding)
3	Niben101Scf11325g00032.1	546360	545480	544730	616620	633110	622630	650490	601650	625800	484830	425780	450860	441710	435120	440190	386040	377740	360060	350710	344540	333610	444060	456870	442990	372530	368400	348860	433650	434760	421880	543080	526360	516510	478420	649520	520680	518240	460720	451500	469680	465110	505060	324670	316640	327130	sp|P51414|RL261_ARATH **** 60S ribosomal protein L26-1 IPR005756 (Ribosomal protein L26/L24P, eukaryotic/archaeal), IPR008991 (Translation protein SH3-like domain) GO:0003735 (structural constituent of ribosome), GO:0005622 (intracellular), GO:0005840 (ribosome), GO:0006412 (translation), GO:0015934 (large ribosomal subunit)
3	Niben101Scf04788g00023.1	227200	225950	217180	252390	260390	259330	261620	247730	247360	175230	173500	162920	174760	179740	180660	150700	147180	172470	168200	167900	136340	115360	129320	133120	158720	115830	139830	134390	148260	150520	118110	121780	129140	147670	184820	172420	163840	186480	197140	147820	157490	142340	130190	132220	130320	sp|P30819|NADC_PSEAE *-** Nicotinate-nucleotide pyrophosphorylase [carboxylating] IPR004393 (Nicotinate-nucleotide pyrophosphorylase) GO:0003824 (catalytic activity), GO:0004514 (nicotinate-nucleotide diphosphorylase (carboxylating) activity), GO:0009435 (NAD biosynthetic process), GO:0016763 (transferase activity, transferring pentosyl groups), GO:0019363 (pyridine nucleotide biosynthetic proces…
3	Niben101Scf05062g02001.1	480830	594180	442320	567170	554070	696710	563900	474860	511860	425460	471470	240420	464420	500090	440530	429220	190240	147300	350240	361600	220740	513410	494840	156030	168960	441110	241050	480840	340700	391850	327630	495570	298700	280850	565570	181650	502110	291660	306520	327180	208030	382930	323120	118560	404600	AT5G64030.1 ***- S-adenosyl-L-methionine-dependent methyltransferases superfamily protein LENGTH=829 IPR004159 (Putative S-adenosyl-L-methionine-dependent methyltransferase), IPR029063 (S-adenosyl-L-methionine-dependent methyltransferase) GO:0008168 (methyltransferase activity)
3	Niben101Scf02891g04009.1	94245	124620	133990	138870	88014	129760	162610	93512	92778	79639	55627	64792	129480	44880	73875	66329	43617	92232	136260	67938	94157	94664	115000	105870	89364	77212	55339	64326	65760	67452	66074	88902	144860	86496	75661	149100	73757	104970	123380	129110	103880	73587	75370	91795	93587	sp|Q55738|GYRA_SYNY3 **** DNA gyrase subunit A IPR013760 (DNA topoisomerase, type IIA-like domain), IPR024946 (Arginine repressor C-terminal-like domain) GO:0003677 (DNA binding), GO:0003916 (DNA topoisomerase activity), GO:0003918 (DNA topoisomerase type II (ATP-hydrolyzing) activity), GO:0005524 (ATP binding), GO:0005694 (chromosome), GO:0006259 (DNA metabolic process), GO:0006265 (DNA topologi…
3	Niben101Scf02849g01009.1	80950	81865	109060	98814	116540	133260	106110	119710	112170	66207	72936	67508	61059	57654	82018	53312	85474	67213	36342	57600	43578	57031	75476	52889	42903	43864	45723	49286	36986	59891	54109	45052	47555	59141	59875	88375	51124	75126	49550	54199	43265	26804	50977	72380	47728	sp|Q6ID18|LAC10_ARATH ***- Laccase-10 IPR008972 (Cupredoxin) GO:0005507 (copper ion binding), GO:0016491 (oxidoreductase activity), GO:0055114 (oxidation-reduction process)
3	Niben101Scf01283g01015.1	17159	16432	16783	17780	18172	18571	15887	16054	14954	17089	12140	12562	6986.4	14647	13031	15820	14861	13410	10755	5267.9	7899.3	10515	13247	12654	11625	9347.3	10608	9524.2	10328	10814	11060	9351.6	7351.6	10308	15496	13871	16280	13661	13116	7535.9	11639	11769	13041	9063.2	12925	sp|P47735|RLK5_ARATH *-** Receptor-like protein kinase 5 IPR001611 (Leucine-rich repeat), IPR011009 (Protein kinase-like domain), IPR013210 (Leucine-rich repeat-containing N-terminal, type 2), IPR013320 (Concanavalin A-like lectin/glucanase domain) GO:0004672 (protein kinase activity), GO:0005515 (protein binding), GO:0005524 (ATP binding), GO:0006468 (protein phosphorylation), GO:0016772 (transf…
3	Niben101Scf03068g00024.1	107320	295980	266580	186750	172660	159460	141780	145090	158240	127690	65051	92409	76652	163350	92038	74152	51311	82201	58809	61229	45869	38241	48385	53621	86758	24734	72675	60202	66033	78822	75601	31680	54962	67011	38892	82651	48542	45305	100500	114020	71196	73061	39768	69020	80024	AT1G58290.1 **** Glutamyl-tRNA reductase family protein LENGTH=543 IPR000343 (Tetrapyrrole biosynthesis, glutamyl-tRNA reductase), IPR016040 (NAD(P)-binding domain) GO:0008883 (glutamyl-tRNA reductase activity), GO:0033014 (tetrapyrrole biosynthetic process), GO:0050661 (NADP binding), GO:0055114 (oxidation-reduction process)
3	Niben101Scf00067g01010.1	189170	207940	247620	310660	371950	276370	298550	372010	340970	109700	150210	131940	119090	181150	166250	111030	127330	142670	100650	107510	140390	166290	108400	101510	59969	139570	89423	88113	109440	66172	59702	148160	56287	119560	122780	53979	98172	147900	118160	58205	42292	49211	61182	58985	49769	sp|Q9LZC5|GDL73_ARATH ***- GDSL esterase/lipase IPR013830 (SGNH hydrolase-type esterase domain) GO:0006629 (lipid metabolic process), GO:0016788 (hydrolase activity, acting on ester bonds)
3	Niben101Scf04436g08005.1	336920	302980	297150	376970	386930	354700	278440	240510	244860	227540	170890	173220	235630	224200	251690	179840	166730	134570	161810	156660	154930	73531	149080	87829	87136	157170	142220	149820	127810	124560	108950	151250	165620	178320	180930	139890	185330	160430	183250	176820	146000	170660	144000	182370	152190	sp|Q9LYK9|RS263_ARATH *-*- 40S ribosomal protein S26-3 IPR000892 (Ribosomal protein S26e) GO:0003735 (structural constituent of ribosome), GO:0005622 (intracellular), GO:0005840 (ribosome), GO:0006412 (translation)
3	Niben101Scf00180g11027.1	184900	96689	236820	243400	114870	292840	256530	307330	354510	34683	77886	60698	98215	172750	89584	199770	165750	75631	177570	76925	71591	113160	150360	201010	146110	144440	61380	56841	84802	38450	59296	99854	45475	55496	248840	78847	105940	95796	124640	79041	86041	64977	39344	208170	231220	sp|Q13435|SF3B2_HUMAN ***- Splicing factor 3B subunit 2 IPR006568 (PSP, proline-rich), IPR007180 (Domain of unknown function DUF382) GO:0005634 (nucleus)
3	Niben101Scf02979g02005.1	102910	89641	102580	103620	93852	92188	166370	118650	170990	47641	46174	100200	72527	44844	90795	48524	74899	87438	36512	46109	76442	133690	125910	127760	87428	92746	43454	129960	62795	85400	130530	143050	73020	31537	72228	110100	87258	48543	86381	54469	76827	89330	112680	94593	64842	sp|P44933|KEFX_HAEIN **** Glutathione-regulated potassium-efflux system protein IPR006153 (Cation/H+ exchanger), IPR016040 (NAD(P)-binding domain) GO:0006812 (cation transport), GO:0006813 (potassium ion transport), GO:0015299 (solute:proton antiporter activity), GO:0016021 (integral component of membrane), GO:0055085 (transmembrane transport)
3	Niben101Scf01554g00001.1	1598500	1556400	1537400	2085200	1984500	2108200	1925400	2036300	2046200	970570	926710	916710	665440	630660	618050	895620	918060	932830	1343600	1382200	1316100	1233300	1224100	1166800	1183800	1237900	1173100	1046400	1046600	1031600	1226000	1231300	1191400	1170800	1622700	1446000	1322800	972710	1074200	922480	943190	936770	880260	885810	944430	sp|A4GYV2|RK2_POPTR **** 50S ribosomal protein L2, chloroplastic IPR002171 (Ribosomal protein L2) GO:0003723 (RNA binding), GO:0003735 (structural constituent of ribosome), GO:0005622 (intracellular), GO:0005840 (ribosome), GO:0006412 (translation), GO:0015934 (large ribosomal subunit), GO:0016740 (transferase activity)
3	Niben101Scf00774g01001.1	181840	189020	173600	269440	256580	254490	272200	280670	271300	159600	158130	151210	143310	139670	138110	149250	160250	127640	122320	111830	101620	89181	92838	99190	100420	107450	98798	88105	55802	84529	87223	107230	91340	110240	126260	158330	142770	127400	126920	41772	110190	105240	71591	61660	132200	AT4G30950.1 ***- fatty acid desaturase 6 LENGTH=448 IPR005804 (Fatty acid desaturase, type 1) GO:0006629 (lipid metabolic process)
3	Niben101Scf01818g07015.1	429110	373740	297930	245250	355330	282510	402800	304210	292530	246360	197850	262270	243780	246700	230800	314970	260710	276790	240840	232110	218780	206590	238980	252030	196650	216370	234090	187220	224720	232110	206910	168610	231820	229630	198250	271240	230890	260450	282540	254000	194740	208090	132830	173020	254410	AT5G13410.1 ***- FKBP-like peptidyl-prolyl cis-trans isomerase family protein LENGTH=256 IPR001179 (Peptidyl-prolyl cis-trans isomerase, FKBP-type, domain), IPR023566 (Peptidyl-prolyl cis-trans isomerase, FKBP-type) GO:0006457 (protein folding)
3	Niben101Scf00858g00009.1	367320	332090	247560	267900	277220	214150	239180	252460	196620	170860	216960	163430	173900	201730	161710	142770	150880	111570	129530	92300	120670	143930	182580	200000	144970	142520	169400	146910	141440	143760	154650	203990	172900	165740	181010	213300	226580	242360	234800	133800	137910	113800	126300	142610	133030	sp|P40282|H2A_PLAFA ***- Histone H2A IPR009072 (Histone-fold) GO:0000786 (nucleosome), GO:0003677 (DNA binding), GO:0005634 (nucleus), GO:0046982 (protein heterodimerization activity)
3	Niben101Scf04738g02001.1	251980	255890	193660	378600	357890	480650	200670	289680	363810	148950	148600	171710	163440	174870	154290	104770	123160	276500	83840	162530	111640	171390	183410	172620	179960	84149	78174	123770	112480	117800	77067	78207	42931	122900	249790	130690	69993	69512	133220	64989	227840	92859	168590	113720	71346	sp|Q8LB81|GDL79_ARATH ***- GDSL esterase/lipase IPR013830 (SGNH hydrolase-type esterase domain) GO:0006629 (lipid metabolic process), GO:0016788 (hydrolase activity, acting on ester bonds)
3	Niben101Scf01329g00002.1	27230	30437	30692	42130	44783	38983	25367	25600	24594	18722	21234	23765	11039	14678	13906	16120	19755	22830	22051	27483	29189	21077	17174	5284.9	19846	58385	14212	16856	17033	2640.4	17035	26047	17180	3555.6	18219	12593	17767	17847	17221	18514	20966	16529	6473.5	59755	25255	sp|Q93Z81|CAX3_ARATH **** Vacuolar cation/proton exchanger 3 IPR004713 (Calcium/proton exchanger) GO:0006812 (cation transport), GO:0006816 (calcium ion transport), GO:0008324 (cation transmembrane transporter activity), GO:0015369 (calcium:proton antiporter activity), GO:0016021 (integral component of membrane), GO:0055085 (transmembrane transport)
3	Niben101Scf10887g01011.1	28522	14898	20038	22839	8189.3	23018	21841	25864	34425	12211	14932	14896	13076	11418	6902.1	15343	12388	14521	9837.6	12967	10944	10965	11582	10428	8090.5	13077	2874.1	14324	1946.1	9536.7	14673	7746.5	12221	7594.4	22913	5823.4	16532	2466.5	18763	7230.2	8574.3	11932	6870.5	13887	15751	sp|Q54KZ8|EIF3M_DICDI **** Eukaryotic translation initiation factor 3 subunit M IPR000717 (Proteasome component (PCI) domain), IPR027528 (Eukaryotic translation initiation factor 3 subunit M) GO:0003743 (translation initiation factor activity), GO:0005515 (protein binding), GO:0005737 (cytoplasm), GO:0005852 (eukaryotic translation initiation factor 3 complex)
3	Niben101Scf01701g07006.1	78039	74198	78057	91466	103860	90536	111670	115320	67571	53960	65358	59405	72557	33312	32683	54573	36081	60962	39011	39387	42822	71596	76191	47898	62814	54011	38008	65809	31850	45692	51033	27987	28464	15795	31061	44508	40233	21987	25014	118530	26796	42150	69193	20442	127220	AT1G75460.1 **** ATP-dependent protease La (LON) domain protein LENGTH=278 IPR003111 (Peptidase S16, lon N-terminal), IPR015947 (PUA-like domain) GO:0004176 (ATP-dependent peptidase activity), GO:0006508 (proteolysis)
3	Niben101Scf03350g00002.1	401770	400030	439080	416660	427500	434100	487880	503260	501880	393590	366590	356950	440570	441090	436200	350610	337630	329200	269800	282840	267460	309100	315670	294950	285260	271790	284290	291620	273240	284770	343760	329600	340720	325810	490880	465470	508940	427140	447940	417000	423080	348250	199180	192970	246070	sp|Q6YW46|EF1G2_ORYSJ **** Elongation factor 1-gamma 2 IPR001662 (Translation elongation factor EF1B, gamma chain, conserved), IPR010987 (Glutathione S-transferase, C-terminal-like), IPR012336 (Thioredoxin-like fold) GO:0003746 (translation elongation factor activity), GO:0005515 (protein binding), GO:0006414 (translational elongation)
3	Niben101Scf02663g00023.1	145850	104060	112680	74563	82075	91147	55972	59023	53703	36804	29298	18904	47278	56124	46078	77324	11216	48685	48800	104040	40605	23970	33920	31378	39605	106740	97680	33438	40353	43326	44433	33400	37408	84197	36465	76026	32539	19463	45454	29948	67350	72234	98541	78226	39296	gb|AIU50623.1| --*- ATP synthase protein I-related protein, partial [Theobroma cacao]
3	Niben101Scf00776g02002.1	55327	59251	61848	55136	40242	57571	71260	57769	51006	33586	42571	30529	44303	29896	45556	47859	46387	46368	32004	33192	33428	44665	32834	27681	44901	26744	32522	52828	57346	57834	24174	25159	22974	47593	59090	59305	45627	41284	26951	33828	33341	33102	30052	13064	29909	tpg|DAA57049.1| ***- TPA: hypothetical protein ZEAMMB73_793304 [Zea mays]
3	Niben101Scf14320g00010.1	56243	39455	52085	57838	62599	20353	34484	41329	30011	17172	35940	13608	38693	33664	37469	14486	20967	10253	23000	30619	44722	17089	37610	66055	24474	36564	13539	35326	24909	35653	39532	39223	37703	40538	38683	45208	47379	40455	21108	13631	26788	21869	37075	37381	34917	sp|P45431|BEV1B_BETPN -**- Major pollen allergen Bet v 1-B IPR000916 (Bet v I domain), IPR023393 (START-like domain) GO:0006952 (defense response), GO:0009607 (response to biotic stimulus)
3	Niben101Scf03455g04002.1	171510	178160	175340	13235	144460	124890	126770	139960	138180	15373	13802	16916	55828	68077	64896	16976	3024.2	17920	50130	58092	50236	9856.7	14282	29362	46923	50524	19952	6161.8	13275	19760	13596	28057	21139	40210	39281	15252	55363	35982	44953	54171	56416	17656	29081	27462	15633	gb|AIE74908.1| ***- IMP dehydrogenase/GMP reductase [Synechocystis sp. PCC 6714] IPR007570 (Uncharacterised protein family Ycf23), IPR013785 (Aldolase-type TIM barrel) GO:0003824 (catalytic activity)
3	Niben101Scf01398g00013.1	545850	624290	442820	433900	413880	544470	504460	547640	583580	443080	273730	279330	421840	341090	355510	418640	287460	475490	352260	366350	344410	296290	342770	334040	156040	276750	319970	260340	323060	258170	429420	219510	370080	382650	265590	446030	412560	278850	291680	254880	394040	265780	342260	256870	486060	AT1G74120.1 *-*- Mitochondrial transcription termination factor family protein LENGTH=445
3	Niben101Scf00151g03003.1	141320	143550	132720	134080	125380	123040	101300	123700	134780	102180	98362	94427	98807	105020	45850	92933	69241	117860	110680	83361	81962	93650	102050	115910	69433	66640	92158	112750	91352	61974	26696	79151	97467	87975	96707	61904	108740	97019	105390	94157	33996	95955	35029	122050	96005	sp|Q9XI36|MBD10_ARATH *-** Methyl-CpG-binding domain-containing protein 10 IPR016177 (DNA-binding domain) GO:0003677 (DNA binding), GO:0005634 (nucleus)
3	Niben101Scf02004g00032.1	290600	290530	271730	215580	232930	180290	233110	255460	235830	170750	181920	158660	182080	200410	219450	151180	176990	176630	160700	171460	180040	94203	193090	201560	153140	163380	166560	142990	153310	155960	132820	148880	169940	130020	189230	206580	202290	193300	206500	183320	199430	192100	162890	167380	183770	sp|Q9KUT3|MDH_VIBCH **** Malate dehydrogenase IPR001557 (L-lactate/malate dehydrogenase) GO:0003824 (catalytic activity), GO:0005975 (carbohydrate metabolic process), GO:0006108 (malate metabolic process), GO:0016491 (oxidoreductase activity), GO:0016616 (oxidoreductase activity, acting on the CH-OH group of donors, NAD or NADP as acceptor), GO:0030060 (L-malate dehydrogenase activity), GO:004426…
3	Niben101Scf03532g00003.1	50629	54856	49619	47621	47960	18742	43208	49845	43089	35063	35612	27431	29193	16746	38996	28524	31270	26886	20606	23344	24847	16461	19556	13619	11850	13553	19647	22847	20802	11812	18085	21213	18990	20158	31079	30436	39849	36002	17681	18235	30669	32244	13259	11575	15137	sp|Q7U4J2|RL29_SYNPX -**- 50S ribosomal protein L29 IPR001854 (Ribosomal protein L29) GO:0003735 (structural constituent of ribosome), GO:0005622 (intracellular), GO:0005840 (ribosome), GO:0006412 (translation)
3	Niben101Scf01211g04015.1	144520	175120	130260	187120	215070	178970	217350	184780	226190	45606	86934	103600	109140	97121	123580	82491	91553	108260	107070	55317	77317	79588	75144	74092	49776	79834	56139	74769	88060	71284	64209	53875	59345	69990	68654	153910	96693	111800	150810	101880	81991	100910	69397	94974	155940	sp|Q7V6S2|KPRS_PROMM **** Ribose-phosphate pyrophosphokinase IPR005946 (Ribose-phosphate diphosphokinase), IPR029057 (Phosphoribosyltransferase-like), IPR029099 (Ribose-phosphate pyrophosphokinase, N-terminal domain) GO:0000287 (magnesium ion binding), GO:0004749 (ribose phosphate diphosphokinase activity), GO:0009156 (ribonucleoside monophosphate biosynthetic process), GO:0009165 (nucleotide bio…
3	Niben101Scf12852g03011.1	225160	240910	233360	239990	250690	245600	265620	275410	291170	106530	187830	158890	68855	156380	108790	132730	142570	139930	118880	119420	81433	113970	100340	85377	80982	90814	74430	85949	36077	78489	84875	79609	70201	69054	79179	52762	142900	53835	126340	89844	88531	77710	103860	98968	109190	ref|NP_001052354.1| ***- product [Oryza sativa Japonica Group] IPR013830 (SGNH hydrolase-type esterase domain)
3	Niben101Scf01164g00008.1	99000	99260	89880	103360	112030	150360	112090	123870	131200	92005	84137	94844	85807	81554	97380	80543	72751	98605	93391	50563	58696	59774	68629	62534	57299	60938	61425	62631	64619	73659	59031	70110	58474	59652	76471	57954	95328	69192	63076	68520	135340	77266	56926	119480	51788	sp|Q3ED65|MENG_ARATH *-*- 2-phytyl-1,4-beta-naphthoquinone methyltransferase, chloroplastic
3	Niben101Scf09973g00002.1	148270	145690	140040	114200	118990	123810	122220	99452	120840	122000	98575	26763	96834	40598	99029	99720	43529	98578	70496	63141	42713	80673	48751	53497	83978	30707	78577	84906	79368	58166	87583	84741	99422	75148	111470	95269	97071	70757	79078	51493	69903	40607	61523	62766	77808	AT1G18640.2 **** 3-phosphoserine phosphatase LENGTH=295 IPR006383 (HAD-superfamily hydrolase, subfamily IB, PSPase-like), IPR023190 (Phosphoserine phosphatase, domain 2), IPR023214 (HAD-like domain) GO:0004647 (phosphoserine phosphatase activity), GO:0006564 (L-serine biosynthetic process), GO:0008152 (metabolic process), GO:0016791 (phosphatase activity)
3	Niben101Scf00926g01011.1	4202.3	19537	8494.5	15598	16076	18912	17013	19645	18330	12247	8525.7	11718	11448	3432	14307	4294.9	3872.7	6191.3	7622.1	8827.6	8081.1	8372.6	19034	2178.2	9274.3	9966.7	7609	7557.5	10178	11302	11919	1297.8	8460.1	7516.3	13294	9716.7	3604.9	8880.4	5525.7	9780.2	17398	5510	1846.8	10994	1211	sp|O48651|ERG1_PANGI **** Squalene monooxygenase IPR003042 (Aromatic-ring hydroxylase-like) GO:0004506 (squalene monooxygenase activity), GO:0008152 (metabolic process), GO:0016021 (integral component of membrane), GO:0016491 (oxidoreductase activity), GO:0050660 (flavin adenine dinucleotide binding), GO:0055114 (oxidation-reduction process)
3	Niben101Scf11254g00005.1	27854	22573	35839	19964	32638	33391	20311	4929.3	7974.7	12092	10189	12258	17394	4087.6	6465.4	3116.9	3068.4	5463.8	13844	11302	8388.3	2395	16960	27813	6500.1	7460.3	12426	11695	15952	16021	12049	12829	5514.7	18789	20215	15282	9430	4590.6	7249.6	7881.5	14520	20720	14114	7752.5	4668	sp|Q498U4|SARNP_RAT --*- SAP domain-containing ribonucleoprotein
3	Niben101Scf00248g00005.1	91252	86132	84002	101990	96282	89654	97214	90156	107500	78402	65442	63352	53004	59131	38583	63967	71021	74306	69791	71414	48514	6472.7	68821	65637	73176	78406	79646	72861	69907	73083	62437	62828	59925	60925	112890	68596	71522	60310	68137	69853	68941	66358	54148	50956	69383	AT5G43750.1 ***- NAD(P)H dehydrogenase 18 LENGTH=212
3	Niben101Scf03483g00002.1	25218	27963	24503	1477.7	24500	1998.3	32112	37956	39762	850.82	2161.1	1814.5	2373.6	17656	1821.2	9569.1	406.12	12028	5621.3	5433.4	4151.5	1065.4	875.87	1040.8	1118.5	879.51	897.42	447.27	1523.8	1167.7	677.65	900.02	7507.5	2096.3	9882.6	1436.2	330.5	6593.5	21437	6309.7	6060.6	843.26	6870	5235.7	1055.9	sp|Q40588|ASO_TOBAC ***- L-ascorbate oxidase IPR017760 (L-ascorbate oxidase, plants) GO:0005507 (copper ion binding), GO:0005576 (extracellular region), GO:0016491 (oxidoreductase activity), GO:0055114 (oxidation-reduction process)
3	Niben101Scf03985g04027.1	40779	50251	14938	52526	50456	64518	80271	82071	84306	32543	23243	3468	9776.3	23875	15668	15158	11870	32666	18713	6745.2	20595	19195	11255	7683	23547	3421.2	15846	18723	7641.4	5271.3	18622	21436	13127	16722	41971	31376	11306	6143.3	4306.1	18250	7108.5	35299	10975	29241	21204	AT4G23820.1 ***- Pectin lyase-like superfamily protein LENGTH=444 IPR000743 (Glycoside hydrolase, family 28), IPR011050 (Pectin lyase fold/virulence factor) GO:0004650 (polygalacturonase activity), GO:0005975 (carbohydrate metabolic process)
3	Niben101Scf09172g01012.1	26128	47394	132390	140500	144950	148120	43288	175730	188340	63687	17175	24916	38164	12708	95520	29451	26207	103040	71336	16615	23411	37825	46593	13917	38586	71285	59521	14009	53933	49052	37377	45946	45236	36741	110410	37614	28359	34453	13337	24520	86037	96216	68949	14319	37001	sp|Q9C9Q4|JAC1_ARATH ***- J domain-containing protein required for chloroplast accumulation response 1 IPR001623 (DnaJ domain)
3	Niben101Scf01326g08017.1	20897	22860	21290	22988	27021	26135	29968	31148	29636	25755	19698	16987	17717	15279	16628	11262	6754.4	7065.8	10261	11446	8672.3	17085	12717	13207	12272	13566	11882	14152	10194	13151	11041	2797.6	10218	13570	16510	18757	33792	10359	10011	10400	30370	25527	8060.5	16449	10471	sp|Q9GKX6|GALM_PIG *-*- Aldose 1-epimerase IPR008183 (Aldose 1-/Glucose-6-phosphate 1-epimerase), IPR011013 (Galactose mutarotase-like domain) GO:0003824 (catalytic activity), GO:0005975 (carbohydrate metabolic process), GO:0016853 (isomerase activity), GO:0030246 (carbohydrate binding)
3	Niben101Scf03927g03008.1	30785	62290	9849.1	70593	68017	78606	83675	92201	88632	12248	11347	13935	41794	4692	11099	21747	18103	49400	62077	53719	55698	51347	52204	55407	60844	8676.6	57321	51898	50428	52222	41749	17390	49955	13181	69580	52497	76015	49775	75243	10920	36853	7375.4	62489	36413	37721	sp|Q67QB5|SAT_SYMTH **** Sulfate adenylyltransferase IPR002650 (Sulphate adenylyltransferase), IPR014729 (Rossmann-like alpha/beta/alpha sandwich fold), IPR015947 (PUA-like domain) GO:0000103 (sulfate assimilation), GO:0004781 (sulfate adenylyltransferase (ATP) activity)
3	Niben101Scf02262g01009.1	53049	62688	53171	86992	82490	59603	84004	77904	75955	53588	35904	33472	51161	47742	41308	38757	38750	36561	50885	42588	39567	47743	43028	47096	43528	38270	39710	43807	40423	39746	44083	46003	49334	39920	66077	46224	68365	56153	59041	46095	45316	43667	36420	45190	54622	sp|Q3IMY5|RL2_NATPD **** 50S ribosomal protein L2 IPR002171 (Ribosomal protein L2) GO:0003723 (RNA binding), GO:0003735 (structural constituent of ribosome), GO:0005622 (intracellular), GO:0005840 (ribosome), GO:0006412 (translation), GO:0015934 (large ribosomal subunit)
3	Niben101Scf04792g02004.1	319660	292060	292950	289830	303440	298090	376820	379620	390600	194080	190460	190830	194900	180820	174430	198540	192340	185620	99137	93866	103480	153060	162080	148130	91130	96986	99864	108810	82541	80891	94681	89924	93446	104990	155720	126460	184270	11142	112810	182950	201860	212770	175230	174340	190890	sp|Q9ZWA8|FLA9_ARATH ***- Fasciclin-like arabinogalactan protein 9 IPR000782 (FAS1 domain)
3	Niben101Scf03133g00007.1	167230	141620	179570	156550	146590	164080	181710	202640	139740	100530	51784	114750	91977	48261	56553	140120	44472	123370	39848	104270	93863	33066	124500	113730	38494	35027	102830	79047	36854	77773	93067	90313	85515	81129	108800	81854	68975	85949	84618	100250	66425	38995	70276	84814	49074	ref|XP_007018106.1| ***- Localized to the inner membrane of the chloroplast [Theobroma cacao] gb|EOY15331.1| Localized to the inner membrane of the chloroplast [Theobroma cacao]
3	Niben101Scf01062g03018.1	24950	15174	22321	27058	29557	26393	28605	29873	24860	7200.5	9257.6	10115	10515	9223.3	17564	11641	6571.2	9751.6	17706	16060	927.46	17277	18107	14146	15542	7353.5	6324.9	17062	14169	23047	17025	13191	18396	13327	14417	15489	14421	6959.2	12851	11609	9657.7	7340.1	15777	19088	18075	sp|Q9M099|SCP24_ARATH *-** Serine carboxypeptidase 24 IPR001563 (Peptidase S10, serine carboxypeptidase), IPR029058 (Alpha/Beta hydrolase fold) GO:0004185 (serine-type carboxypeptidase activity), GO:0006508 (proteolysis)
3	Niben101Scf00022g06009.1	70852	63703	67837	53622	53529	39450	56014	52662	57467	43850	37028	43329	34271	31943	42939	39378	36324	39660	36148	42789	39410	22652	42084	46802	30839	35414	37054	36707	39163	41783	34499	37455	37475	32678	43689	53933	51550	47781	57308	34158	35511	31498	35151	41268	47780	gb|ABF94264.1| ***- expressed protein [Oryza sativa Japonica Group]
3	Niben101Scf08531g03022.1	31370	19996	15239	24697	33051	31004	19678	39107	22027	15069	19754	17701	6396.6	10285	28425	16074	21936	3062.5	16492	14619	10007	8250.7	12915	9883.1	16395	16785	8996.6	17993	14163	13062	9691.7	3391.5	7639.3	9095.9	19799	16594	19374	12365	14830	21325	6987.7	12169	7955.8	5923.7	13600	AT1G35340.1 **** ATP-dependent protease La (LON) domain protein LENGTH=316 IPR003111 (Peptidase S16, lon N-terminal), IPR015947 (PUA-like domain) GO:0004176 (ATP-dependent peptidase activity), GO:0006508 (proteolysis)
3	Niben101Scf03255g01001.1	18557	32891	27176	17452	21549	23859	22707	29935	35318	7861.5	7494	20079	22711	3462.2	7420.7	11830	16222	19551	6151.7	12693	5240.3	19897	18222	6992.9	5128.6	22617	14223	18540	19815	32856	15136	12275	3368.9	3131.7	22545	17290	14686	18529	19138	15006	2393.1	33243	18032	13759	7985.8	ref|XP_003637596.1| *-*- Sister chromatid cohesion protein PDS5-like protein [Medicago truncatula]
3	Niben101Scf01799g02002.1	45592	98498	51173	56148	121670	79537	65293	76533	136320	63248	15916	31191	53283	27520	94745	63443	56727	48569	75118	31997	66333	50664	90782	68321	57563	112440	52290	50279	56023	59263	12568	41567	46405	54366	36642	59722	98563	77885	82350	50820	40828	84003	55990	38413	52498	AT5G16710.1 ***- dehydroascorbate reductase 1 LENGTH=258 IPR010987 (Glutathione S-transferase, C-terminal-like), IPR012336 (Thioredoxin-like fold) GO:0005515 (protein binding)
3	Niben101Scf00059g04019.1	27973	48663	13759	50740	10971	56695	59543	51051	57634	37206	36462	5245.7	11530	9440.8	30279	36807	34708	9791.6	24452	8395.6	13425	17103	21781	26544	9458.6	23361	14388	16735	19580	20782	9319.7	21627	25375	6939.3	26001	43206	40578	35250	24796	8842.9	22238	18930	28070	20633	29167	AT3G53580.1 **** diaminopimelate epimerase family protein LENGTH=362 IPR001653 (Diaminopimelate epimerase, DapF) GO:0005737 (cytoplasm), GO:0008837 (diaminopimelate epimerase activity), GO:0009089 (lysine biosynthetic process via diaminopimelate)
3	Niben101Scf04641g00012.1	566210	520480	504160	216690	487510	424200	224030	527000	268890	193470	504150	198200	146550	178010	159610	115470	447760	452980	351620	177910	345640	175840	244810	242460	125870	232730	150830	251140	226440	151490	353480	252820	255050	147440	472300	475670	288860	419720	215580	357860	240160	402520	246460	260860	262580	sp|Q94K41|SDR3B_ARATH **** Short-chain dehydrogenase reductase 3b IPR002347 (Glucose/ribitol dehydrogenase) GO:0008152 (metabolic process), GO:0016491 (oxidoreductase activity)
3	Niben101Scf01970g08013.1	218770	238280	253160	233320	237300	243130	275700	309040	306230	219070	78026	221090	299590	81273	329210	67756	171240	71842	155340	151210	143370	70724	144360	161230	152730	71989	154720	162970	149970	144580	165520	168820	155610	144710	207830	195750	233910	214470	228170	13308	222030	232090	115360	116530	120890	sp|Q186F8|THIE_PEPD6 *-** Thiamine-phosphate synthase IPR003733 (Thiamine phosphate synthase), IPR029056 (Ribokinase-like) GO:0003824 (catalytic activity), GO:0004789 (thiamine-phosphate diphosphorylase activity), GO:0009228 (thiamine biosynthetic process)
3	Niben101Scf11325g00011.1	177680	89890	176860	75263	156010	164120	86498	204100	168420	119630	80703	150640	96075	89254	102580	93153	60256	97701	93765	93745	105070	89673	109540	77583	45379	95960	83145	65839	81040	67850	79525	77146	84945	52607	104990	76473	87534	108200	112040	85787	73885	80164	101790	115240	85734	sp|Q9HDW7|ATC2_SCHPO **** Calcium-transporting ATPase 2 IPR001757 (P-type ATPase), IPR023214 (HAD-like domain), IPR023298 (P-type ATPase, transmembrane domain), IPR024750 (Calcium-transporting P-type ATPase, N-terminal autoinhibitory domain) GO:0000166 (nucleotide binding), GO:0005388 (calcium-transporting ATPase activity), GO:0005516 (calmodulin binding), GO:0005524 (ATP binding), GO:0016020 (me…
3	Niben101Ctg14682g00001.1	448550	448390	419160	451130	442960	472100	820390	850800	851550	425770	389260	381950	286200	273020	304230	408310	462990	442560	346710	378920	348200	375460	415140	402990	397610	420990	419300	407420	452940	447510	334830	362730	373030	326270	368650	435990	426570	339940	439380	357750	350800	387140	296400	256670	362600	emb|CDY58300.1| *-*- BnaA06g38740D [Brassica napus] IPR021584 (Thylakoid soluble phosphoprotein TSP9)
3	Niben101Scf04315g01006.1	15590	18410	20550	16685	22896	12774	21272	10198	18156	2042.2	14109	3445.9	10870	5893.8	21821	13726	7760.3	16334	3479.7	14360	4283	11578	6785.8	13487	13357	5349.1	11515	4989.8	12615	8323.3	9267.3	14549	8817.3	6117.4	17508	15500	6442	11052	9678	15652	12343	11190	7011	9109.7	11655	AT1G12800.1 **** Nucleic acid-binding, OB-fold-like protein LENGTH=767 IPR012340 (Nucleic acid-binding, OB-fold) GO:0003676 (nucleic acid binding)
3	Niben101Scf00121g00019.1	160830	119820	154480	163980	207030	152790	194650	210710	206940	193710	44892	130470	102390	70479	128200	169820	155540	151550	93643	70587	91880	89575	83838	94277	77163	81558	55152	79562	188780	79838	121190	141280	142930	86665	214600	63994	111820	92516	96845	143680	130700	119950	113560	109700	107100	sp|Q8SRB0|GBLP_ENCCU **** Guanine nucleotide-binding protein subunit beta-like protein IPR015943 (WD40/YVTN repeat-like-containing domain), IPR020472 (G-protein beta WD-40 repeat) GO:0005515 (protein binding)
3	Niben101Scf01045g00016.1	117950	99124	126510	121340	93311	122640	168340	170860	198450	98565	97747	92286	105630	111700	122020	78431	85969	82148	69913	61249	56854	65685	100970	64774	70744	44663	68875	80851	60239	79111	89086	82006	63113	51141	109820	142900	80527	97008	80060	70918	78675	73260	59018	45116	83730	sp|B3H4F1|SP1L1_ARATH ***- Protein SPIRAL1-like 1
3	Niben101Scf00878g04011.1	108090	177300	151400	132990	500060	447720	486220	496210	41159	88477	97160	118430	239220	89187	89674	77075	35037	197620	63779	66303	208650	226610	69971	132630	72191	84089	81480	31006	188750	199480	86125	46325	156610	53943	73363	142890	79199	149450	93049	119940	106930	99620	168640	171670	125480	sp|Q1BM38|MDH_BURCA **** Malate dehydrogenase IPR001557 (L-lactate/malate dehydrogenase) GO:0003824 (catalytic activity), GO:0005975 (carbohydrate metabolic process), GO:0006108 (malate metabolic process), GO:0016491 (oxidoreductase activity), GO:0016615 (malate dehydrogenase activity), GO:0016616 (oxidoreductase activity, acting on the CH-OH group of donors, NAD or NADP as acceptor), GO:0030060 …
3	Niben101Scf02864g09008.1	99182	30686	30522	115290	92651	102390	134520	116590	129910	71724	72537	13597	19096	36900	98539	116720	18303	16409	89024	26759	23227	18915	88424	83566	65846	16177	70550	88372	5256.8	45522	47507	42707	8484.5	35205	40467	28459	47768	63800	42663	79994	73482	88083	71705	71236	30127	sp|P62318|SMD3_HUMAN ***- Small nuclear ribonucleoprotein Sm D3 IPR010920 (Like-Sm (LSM) domain), IPR027141 (U6 snRNA-associated Sm-like protein LSm4/Small nuclear ribonucleoprotein Sm D1/D3)
3	Niben101Scf04808g00007.1	20337	20161	18409	22446	75166	61612	16300	63549	20993	3080	11950	4633.5	12049	31341	19416	22159	10438	18348	20965	14794	19034	16321	16477	13439	15024	27767	18982	15057	17248	18541	23000	15560	15124	14276	17061	32327	26167	20930	8074	19927	19746	26286	23926	6122.9	10851	AT5G53010.1 **** calcium-transporting ATPase, putative LENGTH=1049 IPR001757 (P-type ATPase), IPR023214 (HAD-like domain), IPR023298 (P-type ATPase, transmembrane domain), IPR024750 (Calcium-transporting P-type ATPase, N-terminal autoinhibitory domain) GO:0000166 (nucleotide binding), GO:0005388 (calcium-transporting ATPase activity), GO:0005516 (calmodulin binding), GO:0005524 (ATP binding), GO:…
3	Niben101Scf04042g00001.1	31504	34316	40302	64863	88694	44204	71221	73559	63650	36618	21494	42063	50290	41172	56137	30224	53876	18400	20515	38453	48310	25361	35836	24880	28511	29050	26703	28977	18797	27320	21803	26291	21118	22687	32072	18630	58307	68579	63379	29175	23643	14376	74304	13867	31920	sp|Q9ASZ8|PPR37_ARATH ***- Pentatricopeptide repeat-containing protein IPR002885 (Pentatricopeptide repeat), IPR011990 (Tetratricopeptide-like helical domain) GO:0005515 (protein binding)
3	Niben101Scf04233g00011.1	16811	70039	60170	55410	62887	77606	6602.2	80101	74872	6292.8	44739	38324	49406	60342	10167	7379.5	9970.3	13826	6533.7	9201.1	8674.3	52291	45018	13253	47867	36705	43445	8460	34150	9644.9	45366	7498	42377	7347.6	7267.5	60355	70343	22243	6807.2	38808	39845	7093.4	7734.6	30431	5448.9	sp|Q6GHJ6|RIMM_STAAR *-** Ribosome maturation factor RimM IPR009000 (Translation protein, beta-barrel domain), IPR011033 (PRC-barrel-like), IPR011961 (16S rRNA processing protein RimM), IPR029044 (Nucleotide-diphospho-sugar transferases) GO:0005840 (ribosome), GO:0006364 (rRNA processing), GO:0043022 (ribosome binding)
3	Niben101Scf12318g00006.1	11218	3403.5	1095.4	10653	10558	2172.3	11645	3391.5	15357	4705	5020.1	2423.9	1038.8	2052.1	1443.8	5379.8	2337.6	4578.2	2293.3	9615.8	2056.9	1234	2960.9	1075.4	3557.5	3336.8	3944.7	5638.8	1397.1	6681.1	1532.9	769.26	2678.5	5658.1	3469.5	6728.1	1388.2	4267.8	1847.6	6772.6	1045.5	1320.3	9128.9	2030.1	1279.2	sp|Q9FK53|NLAL2_ARATH *-** H/ACA ribonucleoprotein complex subunit 1-like protein 2 IPR007504 (H/ACA ribonucleoprotein complex, subunit Gar1/Naf1), IPR009000 (Translation protein, beta-barrel domain) GO:0001522 (pseudouridine synthesis), GO:0031429 (box H/ACA snoRNP complex), GO:0042254 (ribosome biogenesis)
3	Niben101Scf01237g03007.1	79269	87766	84577	83411	113670	105330	94935	92585	88858	96757	73957	76859	54069	20645	23738	92372	90005	89351	56712	56683	50505	56089	65856	60796	58532	64241	54458	63101	59113	71149	61587	58416	58412	61770	66600	56256	61019	63157	58693	68719	78436	62315	44211	20513	47201	gb|ABD66598.1| **** iron-binding protein [Pyrus pyrifolia] IPR001519 (Ferritin), IPR008331 (Ferritin/DPS protein domain), IPR009078 (Ferritin-like superfamily) GO:0006826 (iron ion transport), GO:0006879 (cellular iron ion homeostasis), GO:0008199 (ferric iron binding)
3	Niben101Scf01171g05004.1	64413	65070	44529	43594	14787	50313	47249	55308	48167	26160	24559	34330	41419	33358	46514	21838	16380	49740	17745	25082	22809	21275	20733	31333	30594	14829	16925	23918	25391	13298	30452	22176	23647	28025	17624	42718	13735	35720	11526	32061	31483	31905	16142	21391	30815	AT1G04910.1 ***- O-fucosyltransferase family protein LENGTH=519 IPR019378 (GDP-fucose protein O-fucosyltransferase)
3	Niben101Scf22800g00010.1	8638	23478	22430	33119	11600	36015	8792.4	30282	908.16	15105	18962	6737.6	2802.5	7499.5	3314.5	14700	7325.1	7833.5	4494.8	5567.9	5178.1	9269	24399	4368.5	6801.6	6307.1	6103.9	4604.9	12288	4622.8	3304.6	16528	4140.7	7311.5	6212.5	5441.6	1716.2	2557.5	6678.9	4252.9	18409	5249.7	6660.2	4891.4	8409	AT3G26040.1 **** HXXXD-type acyl-transferase family protein LENGTH=442 IPR003480 (Transferase), IPR023213 (Chloramphenicol acetyltransferase-like domain) GO:0016747 (transferase activity, transferring acyl groups other than amino-acyl groups)
3	Niben101Scf04727g03006.1	441380	44144	439300	43644	17556	385780	374500	384050	60752	55947	57350	50601	23422	52350	47015	36749	43373	56119	68294	69481	68786	85364	91917	95398	74718	74193	73975	75488	84304	76980	84397	54594	79888	73792	83336	29109	81004	136740	82922	58515	60698	60490	83142	76962	92252	sp|Q2SD23|FADA_HAHCH ***- 3-ketoacyl-CoA thiolase IPR002155 (Thiolase), IPR016039 (Thiolase-like) GO:0003824 (catalytic activity), GO:0008152 (metabolic process), GO:0016747 (transferase activity, transferring acyl groups other than amino-acyl groups)
3	Niben101Scf06187g01031.1	22362	25686	31290	6012.7	27643	10400	18582	40982	69293	9707.5	6113.3	6386.3	17882	16168	12281	8262.5	7414.9	25408	24642	1339.8	26595	14912	19030	16844	15205	28960	29148	25489	18176	17536	31873	20225	25199	21770	25142	24042	26438	12399	29604	10340	18917	19371	4353.2	6839	4998.8	sp|O35696|SIA8B_MOUSE *-** Alpha-2,8-sialyltransferase 8B IPR001675 (Glycosyl transferase, family 29) GO:0006486 (protein glycosylation), GO:0008373 (sialyltransferase activity)
3	Niben101Scf01072g03010.1	40204	9047.9	30995	174550	11912	214310	152550	177260	184810	18014	15839	14275	29228	17148	35940	20531	27074	24145	11352	16070	12414	20116	22285	5167.6	21518	22497	16350	5185.8	8344.4	16981	123420	10318	10892	3007.5	169800	8373.6	5554.8	6379.1	6161.1	8965.6	4762	729.07	9939.2	6709.3	5822.6	sp|Q94JW0|DOHH_ARATH **** Deoxyhypusine hydroxylase IPR016024 (Armadillo-type fold), IPR027517 (Deoxyhypusine hydroxylase) GO:0005488 (binding), GO:0008612 (peptidyl-lysine modification to peptidyl-hypusine), GO:0019135 (deoxyhypusine monooxygenase activity)
3	Niben101Scf08679g03014.1	22619	40596	729650	297670	34089	469330	344560	43316	50857	17250	38707	17961	1096.9	1235	21698	13528	32816	1882.1	20191	99851	20735	10669	114150	8625.5	33721	7884.8	3252.2	19412	9861.4	9161.1	11113	6895.4	9758.9	5753.2	10288	252600	34289	11673	324910	7410.6	225670	131970	9005.9	15653	178230	sp|Q4I7K4|DED1_GIBZE *-** ATP-dependent RNA helicase DED1 IPR001650 (Helicase, C-terminal), IPR014001 (Helicase superfamily 1/2, ATP-binding domain), IPR014014 (RNA helicase, DEAD-box type, Q motif), IPR027417 (P-loop containing nucleoside triphosphate hydrolase) GO:0003676 (nucleic acid binding), GO:0005524 (ATP binding)
3	Niben101Scf06087g08005.1	105090	152500	48735	182570	121420	160410	219490	128140	277300	85503	23971	89492	85251	90995	165940	67374	92662	13653	34734	36805	11334	82099	101660	18318	59412	69331	72331	106860	80545	13750	14657	8682	66175	62349	137760	20413	162440	19105	162720	26714	23176	138030	115680	25492	113660	Unknown protein
3	Niben101Scf07383g12006.1	2461700	1666600	1353700	1135600	1003600	883550	959020	992750	887510	864650	927210	924200	871650	935490	1050700	897800	990880	1033600	705100	788930	810200	378970	565400	674820	523970	539010	626210	664860	783330	795280	672500	698380	753060	690650	900020	780980	894700	696830	767830	691090	758410	708330	531750	645840	676270	ref|WP_012307378.1| ***- NAD dependent epimerase/dehydratase family protein [Synechococcus sp. PCC 7002] ref|YP_001735011.1| NAD dependent epimerase/dehydratase family protein [Synechococcus sp. PCC 7002] gb|ACA99755.1| NAD dependent epimerase/dehydratase family protein [Synechococcus sp. PCC 7002] IPR016040 (NAD(P)-binding domain)
3	Niben101Scf09792g02014.1	9137400	2669900	2826100	3409900	3555200	3626300	11009000	3048900	3148500	2784600	3045300	2647200	1433200	1809400	1703600	4501700	3320200	6085100	2827200	2766000	2718600	2283800	2286100	2968900	1831400	2292200	1916600	1727600	1906200	2006100	1934300	1676000	2011800	1559000	3123900	2587700	2539900	1943800	2118000	2487100	2393400	2621100	1522700	1531300	1600100	sp|A4QJC3|RBL_AETCO *-** Ribulose bisphosphate carboxylase large chain IPR000685 (Ribulose bisphosphate carboxylase, large subunit, C-terminal) GO:0000287 (magnesium ion binding), GO:0015977 (carbon fixation), GO:0016984 (ribulose-bisphosphate carboxylase activity)
3	Niben101Scf11581g02015.1	248800	241200	257660	282180	292110	263530	318510	347290	452820	247250	202880	189060	417450	246380	246480	230140	235160	21359	211070	192800	228570	197130	182350	219430	182990	196280	192210	153240	182620	155650	170360	53103	158470	176640	271680	236770	245720	269980	227020	221270	204410	182180	239990	185200	244760	sp|A3MKJ8|CLPP_BURM7 ***- ATP-dependent Clp protease proteolytic subunit IPR023562 (Clp protease proteolytic subunit /Translocation-enhancing protein TepA), IPR029045 (ClpP/crotonase-like domain) GO:0004252 (serine-type endopeptidase activity), GO:0006508 (proteolysis)
3	Niben101Scf03376g04013.1	297710	551340	342500	406030	551810	608960	659800	649610	603270	473500	478830	399190	253790	396070	314510	463260	445060	533080	338930	283070	312260	282930	405090	351020	242390	321270	302320	350290	385930	385410	351290	260840	401060	374180	620030	443810	511360	373250	399950	370950	303190	364160	310090	342640	315930	sp|Q2SJP9|MSRB_HAHCH *-** Peptide methionine sulfoxide reductase MsrB IPR011057 (Mss4-like), IPR028427 (Peptide methionine sulfoxide reductase) GO:0006979 (response to oxidative stress), GO:0016671 (oxidoreductase activity, acting on a sulfur group of donors, disulfide as acceptor), GO:0030091 (protein repair), GO:0033743 (peptide-methionine (R)-S-oxide reductase activity), GO:0055114 (oxidation-…
3	Niben101Scf10015g08009.1	15298	51523	11596	9727.6	52087	586450	251970	45757	339870	61739	70675	18346	11338	8972.9	64146	65758	12642	12719	5374.7	18570	21489	24834	54448	18479	25101	22430	9559.3	41147	4618.5	13903	7867.5	22263	5816.9	16921	12396	18734	11597	28617	32375	11779	10514	11810	22487	23355	20529	AT1G75270.1 ***- dehydroascorbate reductase 2 LENGTH=213 IPR010987 (Glutathione S-transferase, C-terminal-like), IPR012336 (Thioredoxin-like fold) GO:0005515 (protein binding)
3	Niben101Scf08300g00008.1	168170	447430	332810	329420	332510	142840	333100	191360	218790	168730	134620	391100	235690	221430	226890	222510	129500	152060	189800	178880	176470	216580	118220	241960	172110	183810	87781	168520	167270	198760	99137	201010	131950	176680	79226	196870	137930	84539	106310	179100	278360	418150	148700	165230	170890	sp|Q9ZWA8|FLA9_ARATH ***- Fasciclin-like arabinogalactan protein 9 IPR000782 (FAS1 domain)
3	Niben101Scf03494g11004.1	21036	106430	21027	33384	22242	44183	29615	30947	31765	10244	15910	19002	17567	15133	38161	13062	24147	25016	19296	8811.1	17868	8332.3	15902	31653	5157	23141	22466	35649	26697	15733	24337	10934	19351	14723	7260.5	13468	32906	23577	32683	33769	30100	17961	8419.2	33147	12664	sp|O48529|STR9_ARATH ***- Rhodanese-like domain-containing protein 9, chloroplastic IPR001763 (Rhodanese-like domain)
3	Niben101Scf05029g00004.1	103320	74605	68208	71439	60952	65996	128540	101570	118060	53674	58717	76532	44475	65849	102310	85399	94004	66381	50038	53961	60243	53217	62852	60491	33907	59258	52717	37690	46264	78092	64293	59175	74509	56591	86202	66611	70494	69870	68971	58313	55641	58517	66203	62694	69954	sp|Q0GZS3|USP_CUCME ***- UDP-sugar pyrophosphorylase IPR002618 (UTP--glucose-1-phosphate uridylyltransferase family), IPR029044 (Nucleotide-diphospho-sugar transferases) GO:0008152 (metabolic process), GO:0070569 (uridylyltransferase activity)
3	Niben101Scf01153g00016.1	69929	65171	2149000	648180	64790	78075	84257	851040	980820	86702	50272	92456	48244	32275	65505	63937	69665	83140	73829	79438	60319	106010	103550	114790	81153	79159	126870	108920	136920	138750	175930	119700	130610	150100	184920	198650	205780	211480	214290	156360	156510	84645	142730	178460	191850	sp|Q9FC99|PFKA3_STRCO **** ATP-dependent 6-phosphofructokinase 3 IPR000023 (Phosphofructokinase domain), IPR012004 (Pyrophosphate-dependent phosphofructokinase TP0108), IPR022953 (Phosphofructokinase) GO:0003872 (6-phosphofructokinase activity), GO:0005524 (ATP binding), GO:0006002 (fructose 6-phosphate metabolic process), GO:0006096 (glycolytic process)
3	Niben101Scf02979g03004.1	146890	138980	47997	155150	129550	234740	190600	192210	186160	117410	168740	75979	151870	139550	146630	128090	36559	74441	75278	75015	85100	188790	115930	73661	84297	55020	156640	95648	96471	93180	101870	94947	84552	108000	59772	115190	93110	155510	127490	100380	92944	92599	47576	66083	72688	sp|B0UTU8|SYN_HISS2 *-** Asparagine--tRNA ligase IPR018150 (Aminoacyl-tRNA synthetase, class II (D/K/N)-like) GO:0000166 (nucleotide binding), GO:0003676 (nucleic acid binding), GO:0004812 (aminoacyl-tRNA ligase activity), GO:0004816 (asparagine-tRNA ligase activity), GO:0005524 (ATP binding), GO:0005737 (cytoplasm), GO:0006418 (tRNA aminoacylation for protein translation), GO:0006421 (asparaginy…
3	Niben101Scf11980g03012.1	12845	64286	11646	16072	64910	15310	21141	19076	20551	14936	21203	1481.3	12618	10857	776.58	23878	6487.7	3370.7	21036	20926	21256	12844	24317	23371	23093	26107	25611	20037	21774	25569	22872	8593.3	31695	16813	22251	23619	29649	4521.5	27738	20329	22151	20516	18613	17173	19392	sp|Q9ZU35|AB7G_ARATH ***- ABC transporter G family member 7 IPR013525 (ABC-2 type transporter), IPR027417 (P-loop containing nucleoside triphosphate hydrolase) GO:0016020 (membrane)
3	Niben101Scf01781g01002.1	94194	495830	99162	83198	92328	115280	240010	17074	109930	75934	16687	21118	13439	23874	68035	44495	45377	99527	57698	58869	158230	42787	37662	22191	58667	56323	78722	63298	53251	70500	49158	19297	146620	71525	46422	92928	85856	86185	97408	53705	63199	75132	106220	98993	116700	AT2G28790.1 ***- Pathogenesis-related thaumatin superfamily protein LENGTH=249 IPR001938 (Thaumatin)
3	Niben101Scf00630g03011.1	114310	56526	100670	65492	61119	47027	103160	84961	70574	37935	87300	34132	72836	82140	52763	74170	35351	30916	86668	28998	22606	41152	41801	41826	42674	76882	31264	61448	36762	24403	68551	68578	31952	65717	46939	69177	61305	34290	60173	46661	33381	35127	42303	46738	48395	sp|Q9FLG1|BXL4_ARATH ***- Beta-D-xylosidase 4 IPR002772 (Glycoside hydrolase family 3 C-terminal domain), IPR017853 (Glycoside hydrolase superfamily), IPR026891 (Fibronectin type III-like domain), IPR026892 (Glycoside hydrolase family 3) GO:0004553 (hydrolase activity, hydrolyzing O-glycosyl compounds), GO:0005975 (carbohydrate metabolic process)
3	Niben101Scf05229g04024.1	52996	27766	61655	84068	28158	59277	51568	37278	42348	59953	17079	31496	28037	16508	47976	27843	24576	48502	28576	22973	17075	34557	28382	30458	15252	32147	65342	10762	18572	21178	14920	23826	28591	45591	40354	30146	29936	33553	52221	35633	33996	57935	34346	28423	33594	sp|Q6FL81|RPE_CANGA **** Ribulose-phosphate 3-epimerase IPR000056 (Ribulose-phosphate 3-epimerase-like), IPR013785 (Aldolase-type TIM barrel) GO:0003824 (catalytic activity), GO:0004750 (ribulose-phosphate 3-epimerase activity), GO:0005975 (carbohydrate metabolic process), GO:0006098 (pentose-phosphate shunt), GO:0008152 (metabolic process), GO:0016857 (racemase and epimerase activity, acting on …
3	Niben101Scf00135g04008.1	241900	92592	277420	167400	262260	176320	188580	250600	176660	222430	227420	190160	104850	75106	105140	157400	171650	187490	155610	161970	154710	161240	105620	119450	152570	101850	209610	110360	102230	143770	107430	156030	128830	89291	156990	127860	88207	146960	168870	144520	220520	250660	136940	174260	109420	AT4G34730.1 ***- ribosome-binding factor A family protein LENGTH=215 IPR000238 (Ribosome-binding factor A), IPR015946 (K homology domain-like, alpha/beta) GO:0006364 (rRNA processing)
3	Niben101Scf05078g04014.1	1371800	277430	258150	1550300	300900	272730	380290	391140	371640	252130	119570	1157900	93029	84970	107980	293740	133930	221670	231170	192230	54806	180650	101060	82574	167720	160570	73370	71041	78476	141970	88144	94196	169560	86942	181220	139690	157740	112620	108420	100500	77561	864380	103060	131320	88239	gb|KFK36450.1| **** catalytic hydrolase [Arabis alpina] IPR006992 (Amidohydrolase 2) GO:0003824 (catalytic activity), GO:0008152 (metabolic process)
3	Niben101Scf06277g05019.1	72917	93255	79261	8103.9	1949.8	4507.8	93864	34241	108180	58646	54006	3996.2	61628	16701	9421.4	21697	21040	62978	12715	10113	4741.9	7592	10952	7308.8	7760.2	5549.6	39248	7096	31211	29440	34911	9747.2	23637	30087	12776	50108	27395	19504	10792	4349.8	53286	17157	23065	12485	35229	sp|Q9HJX7|HELS_THEAC *-** ATP-dependent DNA helicase Hel308 IPR014001 (Helicase superfamily 1/2, ATP-binding domain), IPR016438 (RNA helicase, ATP-dependent, SK12/DOB1), IPR025696 (rRNA-processing arch domain), IPR027417 (P-loop containing nucleoside triphosphate hydrolase) GO:0003676 (nucleic acid binding), GO:0005524 (ATP binding), GO:0016817 (hydrolase activity, acting on acid anhydrides), GO:…
3	Niben101Scf08711g01028.1	99907	65680	118220	78454	89630	65736	63344	95796	218620	69129	64278	77080	71549	64792	36836	67151	81864	78510	49900	39146	56757	33139	60595	46056	39445	53332	58749	76586	64508	77430	70554	83506	69617	60805	78001	96230	70698	94026	55356	73757	73852	92048	11976	64038	56781	sp|Q9FGZ9|UBL5_ARATH *-*- Ubiquitin-like protein 5 IPR029071 (Ubiquitin-related domain) GO:0005515 (protein binding)
3	Niben101Scf12266g02013.1	20055	205120	219140	242370	17424	291580	55358	71081	13646	60245	26859	31496	45653	116470	51153	4330.3	28547	246940	10003	15751	14588	29402	28466	28405	25462	20766	17797	43202	70418	44705	47263	26741	32112	9902.7	25286	25426	36198	26710	25233	39746	21025	47619	33991	46550	25720	sp|Q3T0F2|TPPC2_BOVIN ***- Trafficking protein particle complex subunit 2 IPR006722 (Sedlin) GO:0005622 (intracellular), GO:0006810 (transport), GO:0006888 (ER to Golgi vesicle-mediated transport)
3	Niben101Scf00703g04005.1	165530	34963	39617	143440	152180	173960	179510	196410	244380	125960	115620	132300	104940	76196	45730	108280	37682	101530	75483	65585	77919	20698	79881	82034	20629	31685	73541	59663	58573	63743	78244	79491	83377	68403	114750	105150	124940	110230	41481	33954	131940	17249	89176	94621	91068	sp|Q9CQY5|MAGT1_MOUSE ***- Magnesium transporter protein 1 IPR021149 (Oligosaccharyl transferase complex, subunit OST3/OST6)
3	Niben101Scf00853g00011.1	23452	8211.1	19870	3550.9	16677	7668.6	386060	404150	402680	13651	16284	21659	27041	14878	12272	12677	7852.4	10673	9560.4	9923.7	14346	5981.5	17755	8239.6	7284.9	11339	37400	47487	11086	19754	64924	19683	14605	10552	6365.8	21057	5114.4	23824	9279.3	18964	18574	5101.3	17068	11006	6838.1	sp|Q2JM48|RL7_SYNJB *-*- 50S ribosomal protein L7/L12 IPR000206 (Ribosomal protein L7/L12) GO:0003735 (structural constituent of ribosome), GO:0005622 (intracellular), GO:0005840 (ribosome), GO:0006412 (translation)
3	Niben101Scf02911g05006.1	214660	231480	78053	34604	98010	43236	114970	500720	470140	76776	18224	71653	66668	69104	69331	85755	336560	45074	57803	92586	76999	77972	80084	76501	61233	72398	79330	99814	72714	55395	78848	105540	355470	113610	150320	49722	116190	54373	19612	78540	101780	34059	35555	49583	71946	sp|Q3ZCB8|EMC3_BOVIN **** ER membrane protein complex subunit 3 IPR002809 (Protein of unknown function DUF106, transmembrane) GO:0016020 (membrane)
3	Niben101Scf01369g04024.1	24588	27722	31480	24970	27688	108000	30040	29187	101790	78591	17740	16367	9043.7	41315	5226.4	7827	17128	12948	11652	58416	9405.3	19913	15025	14510	14647	11602	22707	13944	10418	6590.9	7783	16789	11070	6909.2	11341	15744	8459.1	5993.4	14350	11017	95299	10724	10704	14934	14802	sp|Q9SFX3|OST1A_ARATH **** Dolichyl-diphosphooligosaccharide--protein glycosyltransferase subunit 1A IPR007676 (Ribophorin I) GO:0004579 (dolichyl-diphosphooligosaccharide-protein glycotransferase activity), GO:0005783 (endoplasmic reticulum), GO:0006486 (protein glycosylation), GO:0016021 (integral component of membrane)
3	Niben101Scf02073g01008.1	52529	49143	38677	56739	66339	25369	27840	47883	15289	38446	38974	37348	18420	14556	39063	38680	18123	15260	20149	36282	23445	23084	29267	19169	30325	29249	28038	29904	24122	20864	27513	19421	20653	36832	15728	35580	41265	23523	36253	12604	22225	25956	20223	31793	25359	AT5G54160.1 **** O-methyltransferase 1 LENGTH=363 IPR016461 (O-methyltransferase COMT-type), IPR029063 (S-adenosyl-L-methionine-dependent methyltransferase) GO:0008168 (methyltransferase activity), GO:0008171 (O-methyltransferase activity), GO:0046983 (protein dimerization activity)
3	Niben101Scf09548g00013.1	61902	19515	69741	55801	68419	86107	101830	128740	18708	56068	49913	44648	14144	22074	35090	55495	48744	44108	10773	29633	28291	11188	20231	33447	21926	7236.5	21121	31779	20885	19122	19937	10343	21714	22534	29312	4167.9	53715	23630	21852	57731	25651	25378	12654	39588	21582	sp|Q9FL16|PER63_ARATH **** Peroxidase 63 IPR010255 (Haem peroxidase) GO:0004601 (peroxidase activity), GO:0006979 (response to oxidative stress), GO:0020037 (heme binding), GO:0055114 (oxidation-reduction process)
3	Niben101Scf02461g03003.1	27654	27829	36270	16956	19106	20024	17824	34356	39356	21471	31533	36163	21948	19218	20006	16019	10573	15799	7117.3	16167	19011	4244.5	14404	15902	14675	4411.1	2294.3	22112	24277	22225	24611	26802	31848	36849	42730	20314	17540	5828.8	19032	21101	18951	16323	20403	8743.8	27244	sp|Q96GG9|DCNL1_HUMAN ***- DCN1-like protein 1 IPR009060 (UBA-like), IPR014764 (Defective-in-cullin neddylation protein) GO:0005515 (protein binding)
3	Niben101Scf08531g03027.1	28494	26573	29838	21752	24340	25186	20039	24481	21252	17915	16199	13176	16642	12863	7930.7	44247	13162	23299	12117	5383.9	8817.9	11593	4677.1	14142	13818	11457	12083	2767.8	16819	17396	16130	37937	7809	3445.4	14758	20840	16001	10153	9591	50727	5166.4	27254	5443.1	12132	9194.8	sp|Q96DG6|CMBL_HUMAN ***- Carboxymethylenebutenolidase homolog IPR029058 (Alpha/Beta hydrolase fold) GO:0016787 (hydrolase activity)
3	Niben101Scf15972g02017.1	98643	109980	42566	39663	50750	100190	89066	76991	35552	64630	62750	52876	61396	32140	52306	22151	71556	76367	48976	33193	49736	66420	38149	42638	61231	33925	36051	33979	59125	55041	46657	24619	52031	51306	54296	74162	52058	45983	52951	55563	53011	26943	58860	32191	43938	sp|A5VSE2|ATPG_BRUO2 **** ATP synthase gamma chain IPR000131 (ATPase, F1 complex, gamma subunit), IPR023632 (ATPase, F1 complex, gamma subunit conserved site), IPR023633 (ATPase, F1 complex, gamma subunit domain) GO:0015986 (ATP synthesis coupled proton transport), GO:0045261 (proton-transporting ATP synthase complex, catalytic core F(1)), GO:0046933 (proton-transporting ATP synthase activity, ro…
3	Niben101Scf00288g10005.1	14344	667.24	11288	11990	12583	12808	22488	25046	20500	7937	12764	3261.8	14689	11454	7229.8	6268.4	11378	16514	7422.1	6189.8	5066.5	18800	7724.4	5011.5	4589.8	5510.3	2650.3	4031	2406.4	7185	7754.6	9437.7	3959.2	12960	4066.9	10046	5831.8	9989.6	18769	6606.8	13694	5365.6	6898.3	7720.7	6733.7	sp|P0C1H8|PPIA2_RHIO9 **** Peptidyl-prolyl cis-trans isomerase A2 IPR002130 (Cyclophilin-type peptidyl-prolyl cis-trans isomerase domain), IPR024936 (Cyclophilin-type peptidyl-prolyl cis-trans isomerase), IPR029000 (Cyclophilin-like domain) GO:0000413 (protein peptidyl-prolyl isomerization), GO:0003755 (peptidyl-prolyl cis-trans isomerase activity), GO:0006457 (protein folding)
3	Niben101Scf05649g06001.1	89151	47043	18716	52840	75214	50986	34593	24489	27624	41613	38008	31791	34174	40093	40239	31288	6577.6	23721	28571	28907	25443	17977	18083	17700	8312.7	30165	30963	23411	50044	20629	22307	7458.1	52573	58162	45937	35711	26154	28066	19389	23069	21510	28896	64563	25845	24487	sp|Q55141|ILVH_SYNY3 *-** Acetolactate synthase small subunit IPR004789 (Acetolactate synthase, small subunit) GO:0003984 (acetolactate synthase activity), GO:0008152 (metabolic process), GO:0009082 (branched-chain amino acid biosynthetic process), GO:0016597 (amino acid binding)
3	Niben101Scf26939g00001.1	17768	32425	12717	6583.4	6546.3	40040	19583	15092	18950	5938.1	9647	12623	22649	4638.7	22170	11246	3668.8	9922.2	14707	10569	8907.5	12433	3949.9	5939.3	7095.4	17890	8183.1	6995.7	8740.2	3772.2	12438	6651.1	12347	9346.9	17593	6501.9	13596	20595	14445	12177	4202.7	9954	12330	16561	14961	sp|Q16828|DUS6_HUMAN --** Dual specificity protein phosphatase 6 IPR024950 (Dual specificity phosphatase), IPR029021 (Protein-tyrosine phosphatase-like) GO:0006470 (protein dephosphorylation), GO:0008138 (protein tyrosine/serine/threonine phosphatase activity), GO:0016311 (dephosphorylation), GO:0016791 (phosphatase activity)
3	Niben101Scf07123g00003.1	18227	110250	16548	2589.5	12384	31389	13397	143160	15976	23815	9047.4	27970	17798	18118	16372	18336	26310	23663	7843.7	15444	9086.4	7771.1	20590	5890.1	16462	12155	9177.8	8587.1	10199	12198	11112	4092.4	14501	1958	10720	3463.9	12036	26506	11364	15433	24896	25632	35051	16846	14020	emb|CDY40034.1| ***- BnaC05g12810D [Brassica napus]
4	Niben101Scf04218g00008.1	221990	355430	217720	370060	366980	299310	380600	276170	322480	382300	425810	356700	419050	360430	363560	380910	444350	410050	741250	709090	768930	601880	668050	579390	650730	631080	750460	622210	602240	560700	646560	567160	554000	523080	271110	699850	350630	454320	466320	742570	674780	776080	707830	718710	756130	emb|CDY66526.1| ***- BnaC05g49910D [Brassica napus] IPR013328 (Dehydrogenase, multihelical) GO:0016491 (oxidoreductase activity), GO:0016616 (oxidoreductase activity, acting on the CH-OH group of donors, NAD or NADP as acceptor), GO:0050662 (coenzyme binding), GO:0055114 (oxidation-reduction process)
4	Niben101Scf01171g03015.1	2100200	2022200	1964100	2247000	2161800	2183100	2076800	2016900	2018400	3172100	3003200	3006700	3088500	2929400	3151400	3026800	3046500	3005500	2807500	2736200	2759600	3276700	3382700	3348000	2897700	2908600	2893500	3981200	3857100	3885000	4690000	4563300	4552700	4007400	4270300	4342800	4642600	4491200	4648500	3642100	3591100	3467300	4057600	4122200	4331300	AT4G13930.1 **** serine hydroxymethyltransferase 4 LENGTH=471 IPR001085 (Serine hydroxymethyltransferase), IPR015424 (Pyridoxal phosphate-dependent transferase) GO:0003824 (catalytic activity), GO:0004372 (glycine hydroxymethyltransferase activity), GO:0006544 (glycine metabolic process), GO:0006563 (L-serine metabolic process), GO:0030170 (pyridoxal phosphate binding)
4	Niben101Scf07516g00005.1	423960	513840	392930	604150	479640	350590	647090	443030	420500	511800	347620	333900	330920	231980	278490	284340	291070	345220	460350	405720	424430	549480	556420	2153500	429270	2302700	412020	2254300	2237700	2180200	672360	562560	1911400	2024500	538820	582040	628240	358240	495760	1782100	629320	1785400	488830	605790	472780	AT4G00570.1 **** NAD-dependent malic enzyme 2 LENGTH=607 IPR001891 (Malic oxidoreductase) GO:0004470 (malic enzyme activity), GO:0004471 (malate dehydrogenase (decarboxylating) (NAD+) activity), GO:0006108 (malate metabolic process), GO:0051287 (NAD binding), GO:0055114 (oxidation-reduction process)
4	Niben101Scf02581g04013.1	145880	116710	63367	153440	126610	101160	141710	94024	139050	210690	216390	209060	573300	225260	213170	208160	212980	231680	275300	230160	284530	292340	296470	284550	287750	309900	291040	397560	408900	390650	474370	499710	480640	397070	492960	470520	466660	401440	357670	346800	400170	369260	350710	304180	317400	sp|Q2HXL0|RBOHC_SOLTU **** Respiratory burst oxidase homolog protein C IPR000778 (Cytochrome b245, heavy chain), IPR011992 (EF-hand domain pair), IPR013130 (Ferric reductase transmembrane component-like domain), IPR017938 (Riboflavin synthase-like beta-barrel) GO:0004601 (peroxidase activity), GO:0005509 (calcium ion binding), GO:0016020 (membrane), GO:0016491 (oxidoreductase activity), GO:005066…
4	Niben101Scf07664g01011.1	69097	44826	71569	61316	61085	43951	67958	70830	47669	78765	72639	73647	85695	90905	72998	67159	66667	72981	67808	72606	67310	85978	90694	90517	86939	81793	87031	54719	102270	103210	116720	107150	112060	101680	108700	114800	107660	107770	110930	99937	102620	93511	96688	103530	109580	sp|Q9SFU0|SC24A_ARATH *-** Protein transport protein Sec24-like IPR006900 (Sec23/Sec24, helical domain), IPR012990 (Sec23/Sec24 beta-sandwich), IPR029006 (ADF-H/Gelsolin-like domain) GO:0006886 (intracellular protein transport), GO:0006888 (ER to Golgi vesicle-mediated transport), GO:0030127 (COPII vesicle coat)
4	Niben101Scf03069g04013.1	181000	199800	261470	252880	225780	213250	169710	209820	180430	346660	329490	370790	434320	192040	424420	376490	328540	322610	423440	446420	421950	496970	462010	447660	261130	497700	447790	536970	457170	505880	571550	585070	577740	562700	266120	555160	217270	482640	375420	498370	497060	489300	560640	520980	519450	sp|P29545|EF1B_ORYSJ **** Elongation factor 1-beta IPR010987 (Glutathione S-transferase, C-terminal-like), IPR014717 (Translation elongation factor EF1B/ribosomal protein S6) GO:0003746 (translation elongation factor activity), GO:0005853 (eukaryotic translation elongation factor 1 complex), GO:0006414 (translational elongation)
4	Niben101Scf12414g01019.1	564280	486360	502950	580030	533890	560960	535420	512250	465800	339800	282830	296630	417070	270740	350450	262020	266300	307040	616040	582330	363620	508550	411930	477730	495810	416760	400710	543360	411740	487830	644420	717160	583990	460830	555160	652660	353290	495620	508260	366550	392030	431050	523540	532050	727110	sp|P62302|RS13_SOYBN ***- 40S ribosomal protein S13 IPR000589 (Ribosomal protein S15), IPR012606 (Ribosomal protein S13/S15, N-terminal) GO:0003735 (structural constituent of ribosome), GO:0005622 (intracellular), GO:0005840 (ribosome), GO:0006412 (translation)
4	Niben101Scf01592g01001.1	448190	400450	453430	532590	515070	512790	424490	453580	386110	628720	697550	575420	537330	554920	556150	731680	673580	626680	776070	704830	821570	835800	824120	828280	700820	702360	591770	760040	792360	737420	752410	854300	881320	822580	933250	735000	935300	726010	733170	676340	544270	508750	879780	928860	932840	sp|P50250|SAHH_PLAF7 **** Adenosylhomocysteinase IPR000043 (Adenosylhomocysteinase), IPR016040 (NAD(P)-binding domain) GO:0004013 (adenosylhomocysteinase activity), GO:0006730 (one-carbon metabolic process)
4	Niben101Scf01729g01015.1	196140	163830	68452	139640	219870	139180	357170	169180	230810	492400	451560	458170	481030	479620	617000	496650	488910	500440	620660	650530	650420	655500	749500	747810	757220	721930	654260	833130	819790	863480	960060	979030	982120	917310	1085500	1018000	1137100	1020000	1010800	886080	890880	887900	904270	881680	913580	sp|P54873|HMCS_ARATH **** Hydroxymethylglutaryl-CoA synthase IPR010122 (Hydroxymethylglutaryl-CoA synthase, eukaryotic) GO:0003824 (catalytic activity), GO:0004421 (hydroxymethylglutaryl-CoA synthase activity), GO:0008152 (metabolic process), GO:0008299 (isoprenoid biosynthetic process)
4	Niben101Scf06245g01017.1	106310	240190	121110	95542	150070	199500	60492	117300	110230	175540	171620	218620	199950	203200	191610	287600	230350	245590	664350	655270	662070	769250	809050	788860	742520	743000	719480	1116500	1117800	1101100	1309400	1257800	1272200	1521200	643520	793800	932180	1078200	953670	1836100	1775100	1707500	1569300	1521200	1274800	sp|B9SBU9|TPS5_RICCO **** Terpene synthase 5 IPR008930 (Terpenoid cyclases/protein prenyltransferase alpha-alpha toroid), IPR008949 (Isoprenoid synthase domain) GO:0000287 (magnesium ion binding), GO:0008152 (metabolic process), GO:0010333 (terpene synthase activity), GO:0016829 (lyase activity)
4	Niben101Scf01438g08004.1	108660	97502	85427	116720	132780	162930	120070	111330	169240	372820	338570	359080	347560	344790	312910	353580	370190	328510	319480	282220	361910	377700	348140	340360	345270	362270	344170	400150	395980	404890	372330	439330	458170	376580	473940	484860	439470	403470	447930	369280	385480	389520	255110	309420	267630	sp|Q05001|NCPR_CATRO **** NADPH--cytochrome P450 reductase IPR001094 (Flavodoxin), IPR023173 (NADPH-cytochrome p450 reductase, FAD-binding, alpha-helical domain-3), IPR029039 (Flavoprotein-like) GO:0005506 (iron ion binding), GO:0010181 (FMN binding), GO:0016491 (oxidoreductase activity), GO:0055114 (oxidation-reduction process)
4	Niben101Scf12165g00003.1	116210	214190	218770	169620	185660	267460	130710	165070	60235	296610	258710	266530	349630	400250	320780	275220	266300	247170	281770	336530	313710	499860	415710	409890	370900	328720	336800	340070	347740	381160	359740	426500	371660	362230	158510	351370	73846	319960	203970	434640	402960	468070	433140	413630	361860	sp|Q06881|BCCP_NOSS1 *-** Biotin carboxyl carrier protein of acetyl-CoA carboxylase IPR000089 (Biotin/lipoyl attachment), IPR001249 (Acetyl-CoA biotin carboxyl carrier) GO:0003989 (acetyl-CoA carboxylase activity), GO:0006633 (fatty acid biosynthetic process), GO:0009317 (acetyl-CoA carboxylase complex)
4	Niben101Scf07895g06004.1	710320	697750	656270	871830	850960	864550	671470	499950	471570	438060	442600	426510	208740	232880	207100	318110	343450	326220	721340	750060	749050	825280	840490	832220	752280	723200	730720	842450	815650	827000	1068700	1080100	1093500	826370	937880	968650	611770	796840	719780	661050	682760	640820	861460	870180	944160	sp|P49637|R27A3_ARATH ***- 60S ribosomal protein L27a-3 IPR021131 (Ribosomal protein L18e/L15P) GO:0003735 (structural constituent of ribosome), GO:0005622 (intracellular), GO:0005840 (ribosome), GO:0006412 (translation)
4	Niben101Scf00389g01002.1	882500	1031600	943910	742750	748250	706730	619020	552130	555830	1015300	871450	1025100	1052100	850700	892440	1109600	915400	924060	1063700	1065900	1051400	1237400	1320100	1260200	1248900	1192600	1236600	1149300	1093100	1092200	1005300	1021000	1397300	1073500	648220	1170000	516760	1270500	1028300	1278200	1129700	1309100	1456000	984850	1322400	AT1G12250.1 *-*- Pentapeptide repeat-containing protein LENGTH=280 IPR001646 (Pentapeptide repeat)
4	Niben101Scf03861g00009.1	157200	172340	177720	140560	153060	95693	69876	93864	225030	748880	708230	633610	699670	761360	823230	821450	752590	815580	710340	641710	677910	801780	873740	861600	725700	730600	789210	810900	869730	859380	956930	891570	921360	983270	1235400	1160300	914150	772420	859710	851540	917390	923280	660070	667660	732280	sp|Q9LE15|PER4_ARATH **** Peroxidase 4 IPR010255 (Haem peroxidase) GO:0004601 (peroxidase activity), GO:0006979 (response to oxidative stress), GO:0020037 (heme binding), GO:0055114 (oxidation-reduction process)
4	Niben101Scf02907g06016.1	134160	142910	174370	150240	136810	88868	140790	72792	122390	273630	348010	277210	392780	417040	383330	302320	273490	285460	619010	688900	699880	732060	755960	618340	712510	614130	544100	747110	789840	777490	779470	681150	782590	917480	212540	263340	212190	591520	427750	859720	713350	689180	916320	999220	827180	sp|P42327|ADH2_GEOSE ***- Alcohol dehydrogenase IPR002085 (Alcohol dehydrogenase superfamily, zinc-type), IPR016040 (NAD(P)-binding domain), IPR020843 (Polyketide synthase, enoylreductase domain) GO:0008270 (zinc ion binding), GO:0016491 (oxidoreductase activity), GO:0055114 (oxidation-reduction process)
4	Niben101Scf00113g04012.1	155860	425220	383620	534510	536700	563310	501410	268370	307710	230590	337110	187380	129460	161640	162880	186140	221420	199010	172180	412240	432550	164730	494100	485930	356510	399350	372260	415460	464780	471970	454650	503680	491710	498750	632140	579260	411980	468520	444700	428740	364470	439600	452440	480170	495810	sp|Q9XJ54|NTF2_ORYSJ *-** Nuclear transport factor 2 IPR002075 (Nuclear transport factor 2), IPR012677 (Nucleotide-binding alpha-beta plait domain) GO:0000166 (nucleotide binding), GO:0003676 (nucleic acid binding), GO:0005622 (intracellular), GO:0006810 (transport)
4	Niben101Scf06205g02014.1	112060	137050	127450	144810	107830	198240	168220	130630	114350	268190	161740	175190	359480	247140	401680	280620	228550	303400	319860	307690	327230	328180	354530	330310	262310	315540	326690	503990	422360	510540	536480	521690	523880	495510	607330	518050	602120	553750	553350	424900	448860	446850	367810	390470	484610	sp|B8D0S5|SAT_HALOH **** Sulfate adenylyltransferase IPR002650 (Sulphate adenylyltransferase), IPR014729 (Rossmann-like alpha/beta/alpha sandwich fold), IPR015947 (PUA-like domain) GO:0000103 (sulfate assimilation), GO:0004781 (sulfate adenylyltransferase (ATP) activity)
4	Niben101Scf04231g02014.1	182970	198530	177030	200340	348700	215840	165290	207230	358810	367400	325610	431070	300730	262460	289810	464700	457310	462820	541840	428300	413260	473530	538770	471270	390970	390930	343660	628770	716440	540260	635550	637380	604270	775780	895100	777640	814630	726340	721440	633320	532690	647760	636260	630480	616500	ref|NP_001149203.1| ***- seed specific protein Bn15D1B [Zea mays] gb|ACG34551.1| seed specific protein Bn15D1B [Zea mays]
4	Niben101Scf00626g01002.1	117170	243420	186380	212830	178710	207300	256450	184250	147820	316160	265900	303920	308250	261460	246850	241310	203320	284290	368670	1253200	713410	293690	915860	256680	875240	847870	609290	965640	1018400	1068000	898830	779480	1110900	1249200	183160	860330	247180	496130	241490	272860	682850	607640	1086100	1171200	802080	sp|Q9M352|RL362_ARATH ***- 60S ribosomal protein L36-2 IPR000509 (Ribosomal protein L36e) GO:0003735 (structural constituent of ribosome), GO:0005622 (intracellular), GO:0005840 (ribosome), GO:0006412 (translation)
4	Niben101Scf05063g04006.1	255130	403490	407510	323830	361600	283450	186020	311320	381770	371910	497200	449970	569470	420110	593330	544050	514910	448020	519280	480070	471230	502210	396120	417760	478080	285180	482550	416400	434600	518100	475250	451310	322690	506730	215950	569550	395560	421560	347980	467830	609720	570680	594650	487640	545450	sp|P13869|CB12_PETHY ***- Chlorophyll a-b binding protein, chloroplastic IPR022796 (Chlorophyll A-B binding protein), IPR023329 (Chlorophyll a/b binding protein domain) GO:0009765 (photosynthesis, light harvesting), GO:0016020 (membrane)
4	Niben101Scf04003g08001.1	31383	52821	41490	52243	49568	56731	47796	47293	47891	170240	183340	188320	181490	106410	175200	204560	207150	207690	248330	281820	257760	285060	383690	374570	298520	241740	321950	434640	447510	428450	523660	508710	512600	429790	459550	544290	484280	506090	492570	423210	405910	398410	500030	518750	571620	sp|O24151|CAMT4_TOBAC **** Caffeoyl-CoA O-methyltransferase 4 IPR002935 (O-methyltransferase, family 3), IPR029063 (S-adenosyl-L-methionine-dependent methyltransferase) GO:0008171 (O-methyltransferase activity)
4	Niben101Scf02562g00024.1	31144	45321	21766	45575	50298	55281	41836	39501	49641	18413	25935	26527	25621	18421	18799	15946	51978	23079	122190	89756	72526	62607	79438	40858	22665	31808	47334	20376	31190	55052	62733	80157	19879	86881	61777	125540	47133	96223	47342	58581	112300	103160	123690	135170	47424	ref|WP_025880009.1| ***- MULTISPECIES: hypothetical protein [Prochlorococcus] IPR004401 (Nucleoid-associated protein YbaB)
4	Niben101Scf18815g00005.1	76999	9132.2	33426	15062	20520	5157.8	15589	9931.1	17520	66468	75451	1207.5	40880	109310	151670	73285	33640	86219	34023	54433	61164	84390	82356	194510	186770	172210	30672	226010	81755	200930	235140	97419	98087	210850	5450.5	27595	945.47	66856	137600	208740	60655	65991	330430	6821.9	25965	sp|A6UTL8|HIS8_META3 **** Histidinol-phosphate aminotransferase IPR015424 (Pyridoxal phosphate-dependent transferase) GO:0003824 (catalytic activity), GO:0009058 (biosynthetic process), GO:0030170 (pyridoxal phosphate binding)
4	Niben101Scf05226g08012.1	9540.6	10505	11426	10329	10752	10651	1544	4331.6	2184.3	20371	13556	13918	16727	16822	16405	15018	7997.2	9625.4	89757	84847	69485	46008	81122	18996	64223	52383	61957	10295	73978	32100	21528	74925	34549	65833	2670.3	22458	2545.7	24180	23128	86859	80672	85544	70769	73651	37261	ref|WP_022800425.1| ***- secondary thiamine-phosphate synthase enzyme [Deinococcus sp. 2009] IPR001602 (Uncharacterised protein family UPF0047)
4	Niben101Scf18308g01001.1	71007	66030	46785	99536	76125	82397	87562	101470	53377	59131	52152	51982	33888	34557	42791	11568	72232	61405	72243	75718	77089	21440	99199	96817	67354	78547	97942	74787	68517	71629	71189	68549	83216	77774	99230	106890	132010	119300	59171	43525	92895	83072	85703	99370	107080	sp|P56335|IF5A3_SOLTU **** Eukaryotic translation initiation factor 5A-3 IPR001884 (Translation elongation factor IF5A) GO:0003723 (RNA binding), GO:0003746 (translation elongation factor activity), GO:0006452 (translational frameshifting), GO:0043022 (ribosome binding), GO:0045901 (positive regulation of translational elongation), GO:0045905 (positive regulation of translational termination)
4	Niben101Scf08326g00015.1	387.57	9817	5342.8	12028	1456.1	3440.8	3114.2	2183.1	2378.8	14920	14364	14469	17607	15708	15877	13916	7990.4	10203	15388	17011	14897	9423.5	9527.9	9982.9	14470	16457	17926	15139	14102	13122	13251	15747	15328	17734	6315.7	18405	4580.6	22106	16660	18345	21362	20213	20318	23481	24984	sp|P49964|SRP19_ORYSJ **** Signal recognition particle 19 kDa protein IPR002778 (Signal recognition particle, SRP19 subunit) GO:0006614 (SRP-dependent cotranslational protein targeting to membrane), GO:0008312 (7S RNA binding), GO:0048500 (signal recognition particle)
4	Niben101Scf02069g02001.1	2072.7	7620.1	5772.4	5095.4	7351.6	6925.4	2096.6	6001.7	7456.6	12383	9754.5	15024	13213	8879.2	12088	24296	7968.6	14800	5683.6	27714	35869	24754	36658	21670	132010	73216	10968	15852	24247	22327	45763	28170	67398	19647	13084	49616	29021	68789	43595	66881	58491	72776	27664	80261	91865	sp|B0G159|MCFC_DICDI ***- Mitochondrial substrate carrier family protein C IPR002067 (Mitochondrial carrier protein), IPR023395 (Mitochondrial carrier domain) GO:0055085 (transmembrane transport)
4	Niben101Scf12382g00008.1	184710	278940	476260	373610	262000	251050	157790	150170	172880	1533100	1731200	1862200	1577900	1416200	1496500	1731500	1072300	1373700	3537900	3417300	3325500	3854200	3944800	3700100	3186200	3173600	3045700	3979000	3803300	3694000	4038900	3834900	3737200	4426200	225550	4478900	192540	4263400	3190400	4720700	4911200	5128500	2082100	2074700	2011600	sp|P27495|CB24_TOBAC ***- Chlorophyll a-b binding protein 40, chloroplastic IPR022796 (Chlorophyll A-B binding protein), IPR023329 (Chlorophyll a/b binding protein domain) GO:0009765 (photosynthesis, light harvesting), GO:0016020 (membrane)
4	Niben101Scf09604g01004.1	17096	15678	4629.9	10496	11000	16205	11380	6893.5	11108	28973	18283	21000	27493	29564	16906	27283	7748	16526	36734	28517	24656	33576	38271	40079	3107.3	36267	18540	44272	49574	49014	60911	4283.2	57617	47414	65931	20442	17596	51387	54129	41768	11281	23736	47656	45628	30200	sp|Q9LIG2|RLK6_ARATH *-** Receptor-like protein kinase IPR011009 (Protein kinase-like domain), IPR013320 (Concanavalin A-like lectin/glucanase domain) GO:0004672 (protein kinase activity), GO:0005524 (ATP binding), GO:0006468 (protein phosphorylation), GO:0016772 (transferase activity, transferring phosphorus-containing groups)
4	Niben101Scf01683g03005.1	3455.4	3194.3	5092.9	5644.6	4687.4	5855.2	5283.6	6389.6	5552.8	9276.5	10654	9845.5	11761	7587.1	10896	9776.9	7570.8	6860.2	18645	14737	19577	24760	22261	26058	17003	20392	19461	21956	27090	26492	27954	26894	12454	25707	27450	23259	35807	3542.1	30947	31176	32441	30048	23285	22856	22333	sp|B9SBU9|TPS5_RICCO **** Terpene synthase 5 IPR008930 (Terpenoid cyclases/protein prenyltransferase alpha-alpha toroid), IPR008949 (Isoprenoid synthase domain) GO:0000287 (magnesium ion binding), GO:0008152 (metabolic process), GO:0010333 (terpene synthase activity), GO:0016829 (lyase activity)
4	Niben101Scf01514g01002.1	65315	79287	75603	67551	59651	58732	35670	34056	66980	102780	108060	107990	132730	129080	126580	104670	95696	101920	55445	80059	72657	81485	78178	110600	270970	198060	159100	196360	85877	159430	78684	80649	79160	94510	109860	138430	44253	110400	111990	233690	107050	232550	54736	375200	114080	sp|Q5ZMM5|ZN706_CHICK --*- Zinc finger protein 706 IPR026939 (At2g23090 like)
4	Niben101Scf02249g02002.1	52890	72380	37390	62876	68105	13984	10604	15905	16243	116500	98564	118360	32916	41884	37435	124560	102260	94820	113610	14166	111790	24407	115320	114040	116670	26386	8325.2	119340	115470	102070	120190	108340	26322	106610	65786	91094	36954	94472	38469	101310	105360	45115	128560	123260	103720	ref|NP_001063293.1| *-*- OsJ_29536 [Oryza sativa Japonica Group]
4	Niben101Scf12293g02031.1	43865	19613	21485	29525	24690	49186	20788	19659	34530	30774	46583	42740	39748	24514	37736	42423	51286	46145	11629	31983	54414	50729	41445	76563	61228	32642	60767	38790	34061	43326	44600	43315	35649	69959	53551	48565	44873	40209	39803	33351	30045	56034	56829	54731	56733	sp|B0CB70|GLPK_ACAM1 --*- Glycerol kinase IPR018484 (Carbohydrate kinase, FGGY, N-terminal), IPR018485 (Carbohydrate kinase, FGGY, C-terminal) GO:0005975 (carbohydrate metabolic process), GO:0016773 (phosphotransferase activity, alcohol group as acceptor)
4	Niben101Scf03413g01011.1	108450	110560	73606	75841	124450	109700	104840	95630	91120	113890	163800	110010	105340	134740	122340	104600	161760	113670	159080	149860	274640	348000	228010	223250	153390	182690	187970	243790	219830	211540	274310	193010	264940	221650	240360	233430	360640	332510	335990	265930	296150	303530	338380	336500	346300	sp|Q5U403|MVD1_DANRE **** Diphosphomevalonate decarboxylase IPR005935 (Diphosphomevalonate/phosphomevalonate decarboxylase) GO:0004163 (diphosphomevalonate decarboxylase activity), GO:0005524 (ATP binding), GO:0005829 (cytosol), GO:0008299 (isoprenoid biosynthetic process), GO:0016831 (carboxy-lyase activity), GO:0019287 (isopentenyl diphosphate biosynthetic process, mevalonate pathway)
4	Niben101Scf07242g07006.1	214670	81379	230580	83773	73855	137580	111660	197840	113930	179090	169940	120910	165700	190740	197290	200110	246240	244290	371420	385280	385310	310140	305120	324560	361640	370310	279730	377790	418080	397960	419060	470930	449140	518830	689070	683550	536020	530340	562660	535240	559270	488430	576630	536250	526940	AT3G28740.1 ***- Cytochrome P450 superfamily protein LENGTH=509 IPR001128 (Cytochrome P450) GO:0005506 (iron ion binding), GO:0016705 (oxidoreductase activity, acting on paired donors, with incorporation or reduction of molecular oxygen), GO:0020037 (heme binding), GO:0055114 (oxidation-reduction process)
4	Niben101Scf01005g04005.1	319970	209260	277940	235690	281380	407520	328620	498530	582820	794890	488690	391230	617280	784400	445450	372010	735070	354830	499310	496900	619300	704960	700300	438860	727220	539260	442430	815070	820570	805250	889220	906850	754920	749100	743360	972180	599930	780780	946850	692480	782900	736610	707930	929860	704200	sp|Q9JZ77|RIBB_NEIMB **** 3,4-dihydroxy-2-butanone 4-phosphate synthase IPR000422 (3,4-dihydroxy-2-butanone 4-phosphate synthase, RibB), IPR000926 (GTP cyclohydrolase II, RibA), IPR016299 (Riboflavin biosynthesis protein RibBA) GO:0003935 (GTP cyclohydrolase II activity), GO:0008686 (3,4-dihydroxy-2-butanone-4-phosphate synthase activity), GO:0009231 (riboflavin biosynthetic process)
4	Niben101Scf00158g04018.1	36341	42724	49481	42418	44828	18791	11855	16423	39381	44563	39217	49633	59904	45551	41826	42200	60535	31090	62873	64088	68696	68481	86976	87299	75481	80874	79955	141030	137130	123720	150440	143970	140300	119650	112250	132620	73331	76177	52199	97561	84963	88542	57080	39920	47152	AT5G04330.1 ***- Cytochrome P450 superfamily protein LENGTH=512 IPR001128 (Cytochrome P450) GO:0005506 (iron ion binding), GO:0016705 (oxidoreductase activity, acting on paired donors, with incorporation or reduction of molecular oxygen), GO:0020037 (heme binding), GO:0055114 (oxidation-reduction process)
4	Niben101Scf02831g01009.1	23397	19734	7498	9757.6	6554.9	8355.3	10492	6663.3	10943	25830	26425	33026	17217	7577.4	10409	10347	27594	32406	33292	26208	34102	24757	26150	19332	57301	15159	18091	45163	56169	42350	49501	50901	40881	39790	8444.9	33632	33718	31773	49645	4439.3	50299	8746.1	90085	85976	55154	Unknown protein
4	Niben101Scf07736g01006.1	49544	98783	45908	64030	74036	84321	61862	96815	101280	184340	172270	175270	59013	58441	58074	174850	170510	178150	156790	156860	152250	170270	159980	179190	134660	128420	133800	180950	172340	179460	145390	162950	159460	186440	222370	185180	346510	185980	227500	137010	125930	146560	206630	200920	223180	sp|Q9ZQX4|VATF_ARATH **** V-type proton ATPase subunit F IPR008218 (ATPase, V1 complex, subunit F) GO:0015991 (ATP hydrolysis coupled proton transport), GO:0033180 (proton-transporting V-type ATPase, V1 domain), GO:0034220 (ion transmembrane transport), GO:0046961 (proton-transporting ATPase activity, rotational mechanism)
4	Niben101Scf07001g01011.1	120320	104250	130850	262420	108460	176650	54530	178200	71289	163230	180800	305510	334660	331840	159950	156130	146400	131400	326720	332410	321340	253210	192130	167430	161200	148440	142970	256700	270420	260230	202660	262360	181160	257630	315650	178720	190750	172110	136260	331620	189500	210120	309350	304220	343610	sp|O42993|FKBP_SCHPO ***- Peptidyl-prolyl cis-trans isomerase IPR001179 (Peptidyl-prolyl cis-trans isomerase, FKBP-type, domain), IPR023566 (Peptidyl-prolyl cis-trans isomerase, FKBP-type) GO:0006457 (protein folding)
4	Niben101Scf03670g02008.1	13647	21143	17366	17112	16422	16406	16733	21104	18429	24789	18133	23705	31498	15441	24062	15071	22257	21579	20950	23220	15582	34543	33328	34734	9791.6	28559	11660	22397	24207	29712	33152	25803	34304	28033	23334	32674	24248	28774	38428	18291	9377.4	22315	15328	30880	22410	sp|Q9SB50|AP4M_ARATH **** AP-4 complex subunit mu IPR001392 (Clathrin adaptor, mu subunit), IPR028565 (Mu homology domain) GO:0005515 (protein binding), GO:0006810 (transport), GO:0006886 (intracellular protein transport), GO:0016192 (vesicle-mediated transport), GO:0030131 (clathrin adaptor complex)
4	Niben101Scf03209g00029.1	111340	106370	97222	130430	125970	114450	82358	874.05	93759	69514	64833	63718	50893	48883	50671	55948	63661	53939	102300	109910	105170	114040	119180	119060	112910	117310	116430	117820	130660	121890	149530	159650	161120	130900	142790	180810	116970	135220	138320	90676	94385	89495	163140	175680	190390	sp|P34091|RL6_MESCR ***- 60S ribosomal protein L6 IPR000915 (60S ribosomal protein L6E), IPR005568 (Ribosomal protein L6, N-terminal), IPR008991 (Translation protein SH3-like domain) GO:0003735 (structural constituent of ribosome), GO:0005622 (intracellular), GO:0005840 (ribosome), GO:0006412 (translation)
4	Niben101Scf03226g03006.1	19229	12961	13888	3238.5	25767	7626.9	11027	18990	18179	11150	6716.3	2422.4	6210.7	5441.6	16196	5908.8	6435.1	13298	1951.2	28363	28709	34495	22578	23820	13678	29443	15636	21255	25451	29353	27333	30317	34481	30518	44628	24567	44028	28461	31037	20791	12667	23103	49598	23047	23049	AT2G46150.1 ***- Late embryogenesis abundant (LEA) hydroxyproline-rich glycoprotein family LENGTH=221 IPR004864 (Late embryogenesis abundant protein, LEA-14)
4	Niben101Scf02877g02002.1	23943	9380.8	25216	32496	30379	37617	30876	32195	32198	34149	38225	39677	36911	31797	35676	38712	28755	37681	37981	32927	47991	39997	36277	36697	49446	29658	39875	51516	65128	48496	58906	58631	32542	35088	50034	47991	10587	44598	49061	57077	51473	52995	54109	57586	44306	sp|O14368|HSP16_SCHPO --*- Heat shock protein 16 IPR008978 (HSP20-like chaperone)
4	Niben101Scf01999g06011.1	389890	333690	383790	373210	731620	385600	312110	307280	583060	868570	451120	424750	462730	444370	445140	447540	431190	519580	563910	562500	910690	588240	598120	564420	960590	588160	929550	736700	692760	515450	1414700	1348300	765310	811860	585560	1575300	799110	945820	930840	872760	887980	870170	1074400	1132600	1009700	sp|Q0BW82|DNAK_GRABC ***- Chaperone protein DnaK IPR013126 (Heat shock protein 70 family), IPR029047 (Heat shock protein 70kD, peptide-binding domain), IPR029048 (Heat shock protein 70kD, C-terminal domain) GO:0005524 (ATP binding), GO:0006457 (protein folding), GO:0051082 (unfolded protein binding)
4	Niben101Scf14282g00009.1	71213	20927	52631	58866	27748	45051	34881	29222	63512	27427	41327	47407	35761	48361	40654	37008	32160	19237	79260	101280	85504	42537	67539	59116	103030	108380	114910	69391	73761	78420	83997	88191	79993	86799	43715	66541	60179	45680	58405	130200	123640	90865	124880	124150	84652	sp|Q8EBH1|G6PI_SHEON **** Glucose-6-phosphate isomerase IPR001672 (Phosphoglucose isomerase (PGI)) GO:0004347 (glucose-6-phosphate isomerase activity), GO:0006094 (gluconeogenesis), GO:0006096 (glycolytic process)
4	Niben101Scf01548g00002.1	300670	147400	284860	266330	214520	88979	119350	120310	117620	200560	183880	185950	31824	70243	140040	267450	229740	115130	245790	319010	343090	237720	315960	171350	278270	310180	307590	346120	373810	372010	426710	413100	414150	370930	384790	461270	338190	319920	354180	317330	338550	282840	443840	446500	472950	sp|P27494|CB23_TOBAC ***- Chlorophyll a-b binding protein 36, chloroplastic IPR022796 (Chlorophyll A-B binding protein), IPR023329 (Chlorophyll a/b binding protein domain) GO:0009765 (photosynthesis, light harvesting), GO:0016020 (membrane)
4	Niben101Scf02413g04014.1	128020	91726	261300	390110	343310	130650	320190	338540	302480	354680	154150	313060	455180	444880	215880	311920	214450	275590	484860	427760	468280	318680	354460	363060	490660	520270	321910	3047500	519820	2716900	445250	599010	569320	486190	436460	404650	325050	600460	290660	373050	416160	514710	446600	607470	475990	sp|Q1RJT3|ODP2_RICBR **** Dihydrolipoyllysine-residue acetyltransferase component of pyruvate dehydrogenase complex IPR006257 (Dihydrolipoyllysine-residue acetyltransferase component of pyruvate dehydrogenase complex), IPR023213 (Chloramphenicol acetyltransferase-like domain) GO:0004742 (dihydrolipoyllysine-residue acetyltransferase activity), GO:0006090 (pyruvate metabolic process), GO:0008152 (…
4	Niben101Scf14323g01022.1	204940	212460	183000	661990	197300	184300	212380	222190	207140	228630	734910	219230	242020	648240	287310	223400	254160	693360	708390	746300	757020	789290	796340	808750	726750	758360	727700	958090	971190	1027300	1098000	1124700	1132900	1093600	765380	811700	769700	950810	823570	1249600	1018000	1214600	986900	1244500	1001600	sp|P41216|ACSL1_MOUSE ***- Long-chain-fatty-acid--CoA ligase 1 IPR000873 (AMP-dependent synthetase/ligase) GO:0003824 (catalytic activity), GO:0008152 (metabolic process)
4	Niben101Scf07522g00004.1	492140	414340	553670	537820	2016000	552860	519780	524000	599180	605870	606700	515920	403660	412130	433700	592200	600140	598810	626830	728350	731410	1255000	1176100	1186800	1337700	1213400	781190	1375900	1340700	1444000	1575800	1001800	987940	824080	2604300	1167300	2092000	2444600	1215200	847180	2134300	879160	1124500	1230200	2430700	ref|NP_001288856.1| **** mitochondrial outer membrane protein porin 3-like [Brassica rapa] gb|AAS21632.1| voltage-dependent anion-selective channel protein [Brassica rapa] IPR023614 (Porin domain), IPR027246 (Eukaryotic porin/Tom40) GO:0005741 (mitochondrial outer membrane), GO:0006820 (anion transport), GO:0008308 (voltage-gated anion channel activity), GO:0044070 (regulation of anion transport)…
4	Niben101Scf02015g01007.1	256080	194810	210840	156850	358400	398920	225560	178060	156420	284410	152810	233110	264540	244560	319290	173690	251200	200330	503980	328980	290440	452210	472470	421140	283420	490390	330210	479230	299960	375100	419140	365980	424980	351840	275200	283330	629390	541700	735760	508860	519200	566200	419700	409310	468990	sp|Q9LEC8|DHEB_NICPL *-*- Glutamate dehydrogenase B IPR006095 (Glutamate/phenylalanine/leucine/valine dehydrogenase) GO:0006520 (cellular amino acid metabolic process), GO:0016491 (oxidoreductase activity), GO:0055114 (oxidation-reduction process)
4	Niben101Scf04347g00001.1	272190	120740	79729	89064	111240	114940	156730	353490	188640	263140	268600	166430	120370	228200	261210	235950	192230	193810	231480	206360	218780	258380	330900	242860	284160	245080	182120	254630	230750	326120	346470	75234	272130	347550	291370	376300	262450	394280	223020	338860	341400	283460	292940	351880	381410	sp|Q39828|SDL5A_SOYBN ***- Dynamin-related protein 5A IPR000375 (Dynamin central domain), IPR001401 (Dynamin, GTPase domain), IPR020850 (GTPase effector domain, GED), IPR022812 (Dynamin superfamily), IPR027417 (P-loop containing nucleoside triphosphate hydrolase) GO:0003924 (GTPase activity), GO:0005525 (GTP binding)
4	Niben101Scf07725g01004.1	213310	144440	101370	263350	357520	206810	285950	227570	172540	293210	278120	255890	241170	187350	171700	320100	300780	322450	436990	428120	845880	541060	530570	528170	437460	440080	422670	540150	500050	529460	460680	524670	518740	914340	575800	550610	515320	498890	533460	812290	778970	327150	425570	467840	878780	sp|Q9LUE2|TPS18_ARATH ***- Terpenoid synthase 18 IPR008930 (Terpenoid cyclases/protein prenyltransferase alpha-alpha toroid), IPR008949 (Isoprenoid synthase domain)
4	Niben101Scf21770g00007.1	102740	70000	121740	99054	79685	139470	204500	134130	88492	81380	285320	147300	176190	224750	115050	101850	149880	90794	440880	436620	333830	590290	559370	509340	101640	446660	443680	469160	385950	627450	527500	522910	538300	493380	212530	284790	196850	348570	200840	371960	481960	816790	509330	594140	408710	AT1G03445.1 **** Serine/threonine protein phosphatase family protein LENGTH=793 IPR012391 (Serine/threonine protein phosphatase, BSU1), IPR029052 (Metallo-dependent phosphatase-like) GO:0004721 (phosphoprotein phosphatase activity), GO:0005506 (iron ion binding), GO:0005515 (protein binding), GO:0016787 (hydrolase activity), GO:0030145 (manganese ion binding)
4	Niben101Scf00820g03003.1	2085.2	11373	1439.8	4995.7	11837	6802.7	9574	6924	7113.6	6329.5	9583.5	8532.1	9616.9	7403.3	12213	8327	4340.5	7592.4	52503	60636	59802	2919.6	34919	40545	53678	53501	56025	43551	48244	48593	40546	34823	45384	46220	6494.6	53271	6966.2	39060	17651	49996	49084	50275	61305	62814	51792	ref|WP_015115534.1| ***- phage shock protein A (PspA) family protein [N [Nostoc sp. PCC 7107] IPR007157 (PspA/IM30)
4	Niben101Scf08533g00005.1	263270	297970	380950	255550	317920	256900	299800	269320	283230	264400	270950	211270	473110	417580	371400	284710	287660	216650	398040	479870	414380	429990	490170	457150	409000	326210	414020	543630	482710	481560	534690	572780	530600	534730	412970	473170	578020	451340	478150	375140	394230	389370	573620	532860	578870	sp|Q8PX16|ARGD_METMA ***- Acetylornithine aminotransferase IPR005814 (Aminotransferase class-III), IPR015424 (Pyridoxal phosphate-dependent transferase) GO:0003824 (catalytic activity), GO:0006525 (arginine metabolic process), GO:0008483 (transaminase activity), GO:0030170 (pyridoxal phosphate binding)
4	Niben101Scf10940g04023.1	9855.6	1261.9	2679.1	2777.7	1364	2887.4	2634.4	510.93	1506.7	4772.7	2501.8	1508.1	2394.6	2045.9	2090.3	2704.4	2271.8	1555.6	17725	15752	17028	3136.6	2831.7	2172.3	16706	16612	18244	8016.1	5925.2	6457	6464.6	8512.7	6140.9	10543	3322.1	11776	4099	10001	6159	13454	12280	11915	16998	19494	16500	AT5G43830.1 ***- Aluminium induced protein with YGL and LRDR motifs LENGTH=251 IPR024286 (Domain of unknown function DUF3700), IPR029055 (Nucleophile aminohydrolases, N-terminal)
4	Niben101Scf16022g04010.1	287660	164480	150820	170170	75990	183460	217920	255390	117280	158120	172000	132050	251830	198360	159270	235660	131460	225990	266780	232280	258880	460280	236190	247760	594730	373920	363380	366360	415740	409330	530210	827060	481470	587370	446830	403050	552430	449470	493690	424970	426530	425420	471250	525550	483470	sp|Q54UK0|PLDA_DICDI *-** Phospholipase D A IPR015679 (Phospholipase D family), IPR024632 (Phospholipase D, C-terminal) GO:0003824 (catalytic activity), GO:0004630 (phospholipase D activity), GO:0005509 (calcium ion binding), GO:0005515 (protein binding), GO:0008152 (metabolic process), GO:0016020 (membrane), GO:0046470 (phosphatidylcholine metabolic process)
4	Niben101Scf35487g00005.1	622160	636620	665340	753810	767490	710290	558100	640930	453300	799740	760140	843510	573420	547610	600900	927540	962090	939010	1282400	1296400	1259000	1465500	1508500	1443600	1160900	1101800	1064800	1185400	1232500	1255400	1382500	1346600	1350900	1326200	1378300	1470500	1451900	1334700	1467500	1157600	1146200	1215400	1705100	1704800	1787900	AT2G41100.1 **** Calcium-binding EF hand family protein LENGTH=324 IPR011992 (EF-hand domain pair) GO:0005509 (calcium ion binding)
4	Niben101Scf02821g04003.1	127050	139970	138980	149040	132890	167660	181660	172060	214170	162530	136320	147740	115470	122810	258930	142270	150480	158070	213740	211270	207590	182090	204730	182320	223160	276440	260670	222090	215870	244950	216940	229880	227120	221040	152860	227590	184560	225540	205050	272820	262070	276700	299820	286340	311990	sp|Q609G2|UBIG_METCA *-** Ubiquinone biosynthesis O-methyltransferase IPR025774 (Tocopherol O-methyltransferase), IPR029063 (S-adenosyl-L-methionine-dependent methyltransferase) GO:0008152 (metabolic process), GO:0008168 (methyltransferase activity)
4	Niben101Scf02798g00024.1	187550	149590	21071	182340	252600	421790	93470	118010	240090	249130	326810	172560	189550	152640	182620	151340	248350	256650	154790	172630	297500	496090	1127700	1245300	154840	999420	1000500	1235600	207860	1184400	1147500	919800	1106300	227760	298210	282730	121430	263930	226920	319830	807500	553180	1194300	1193600	718240	sp|P58311|PSAA_WHEAT *-** Photosystem I P700 chlorophyll a apoprotein A1 IPR001280 (Photosystem I PsaA/PsaB) GO:0009522 (photosystem I), GO:0009579 (thylakoid), GO:0015979 (photosynthesis), GO:0016021 (integral component of membrane)
4	Niben101Scf06861g00004.1	94611	39521	60056	71209	44984	62788	74592	25489	77703	39772	66769	59917	46074	59275	33760	55724	56875	52316	71149	79245	100050	46833	55975	103120	68584	30336	76443	103430	93169	86450	100900	108900	110700	115360	72366	83424	78823	82295	86540	101960	91461	113340	82457	96665	88476	sp|Q9M081|SC24B_ARATH **** Protein transport protein Sec24-like IPR002035 (von Willebrand factor, type A), IPR006895 (Zinc finger, Sec23/Sec24-type), IPR006896 (Sec23/Sec24, trunk domain), IPR012990 (Sec23/Sec24 beta-sandwich), IPR029006 (ADF-H/Gelsolin-like domain) GO:0006886 (intracellular protein transport), GO:0006888 (ER to Golgi vesicle-mediated transport), GO:0008270 (zinc ion binding), GO…
4	Niben101Scf07459g00017.1	297360	288160	310940	382410	388300	308250	366190	316370	344890	394490	344050	356520	386420	380240	393580	325330	359850	326230	490610	489380	528310	466080	516220	521510	494050	467600	467940	519250	427870	395520	443670	436420	475010	447320	432980	469660	629600	609200	541410	507450	560280	536810	616010	602830	598170	sp|Q1W375|PMM_TOBAC **** Phosphomannomutase IPR006379 (HAD-superfamily hydrolase, subfamily IIB), IPR023214 (HAD-like domain) GO:0003824 (catalytic activity), GO:0004615 (phosphomannomutase activity), GO:0005737 (cytoplasm), GO:0008152 (metabolic process), GO:0019307 (mannose biosynthetic process)
4	Niben101Scf03768g03011.1	60153	116610	121400	131930	116950	119250	129550	139480	121790	127680	163830	110690	152480	146480	138290	118760	117760	116550	181530	162420	179620	153720	178820	169160	228250	190120	185230	175680	207390	223170	258290	221980	217030	193340	206020	194980	297140	250880	235050	209660	181340	200640	248430	259530	239430	ref|WP_023508058.1| **** membrane protease subunit stomatin/prohibitin-like protein [Rickettsia monacensis] emb|CDI29842.1| membrane protease subunit stomatin/prohibitin-like protein [Rickettsia monacensis IrR/Munich] IPR001107 (Band 7 protein) GO:0016020 (membrane)
4	Niben101Scf00305g04005.1	28327	41807	25831	35696	37291	122640	33962	38243	25312	43616	47783	42615	23546	6361.7	86821	47392	41363	42926	74495	84025	69676	75999	99475	94865	69144	65639	79058	96623	103530	97409	97152	102510	100040	90176	78348	81219	82306	68828	67108	60252	51792	52727	132970	148590	136610	AT5G66530.1 ***- Galactose mutarotase-like superfamily protein LENGTH=307 IPR008183 (Aldose 1-/Glucose-6-phosphate 1-epimerase), IPR011013 (Galactose mutarotase-like domain) GO:0003824 (catalytic activity), GO:0005975 (carbohydrate metabolic process), GO:0016853 (isomerase activity), GO:0030246 (carbohydrate binding)
4	Niben101Scf00789g00009.1	21010	14256	21707	24418	25110	12687	13936	54982	37627	53702	35968	19758	26491	26212	26282	22746	22041	35820	28809	23585	30300	68472	39422	54273	31973	46814	41280	74527	56833	58479	64838	65853	69535	72485	111380	81464	58973	46777	78290	54260	49884	47800	82836	91675	66760	sp|P42041|ALDH_ALTAL **** Aldehyde dehydrogenase IPR016161 (Aldehyde/histidinol dehydrogenase), IPR029510 (Aldehyde dehydrogenase, glutamic acid active site) GO:0008152 (metabolic process), GO:0016491 (oxidoreductase activity), GO:0016620 (oxidoreductase activity, acting on the aldehyde or oxo group of donors, NAD or NADP as acceptor), GO:0055114 (oxidation-reduction process)
4	Niben101Scf10749g02005.1	48968	69361	52633	65157	67418	71966	104220	75372	69269	69904	73369	80858	49375	57394	57198	77302	65985	76627	97323	81837	94598	97746	108030	99886	83184	96456	90998	101440	93108	95974	131940	111110	115790	122830	119250	116380	107650	106770	108670	109610	116500	118120	146750	154390	170800	AT1G50700.1 **** calcium-dependent protein kinase 33 LENGTH=521 IPR011009 (Protein kinase-like domain), IPR011992 (EF-hand domain pair) GO:0004672 (protein kinase activity), GO:0004674 (protein serine/threonine kinase activity), GO:0005509 (calcium ion binding), GO:0005524 (ATP binding), GO:0006468 (protein phosphorylation), GO:0016772 (transferase activity, transferring phosphorus-containing gro…
4	Niben101Scf02658g01005.1	11069	16320	46949	9698.4	12340	11389	10181	9389.9	8370	15749	13703	20635	30036	20342	7701.5	16243	15486	11660	66306	63868	68063	64547	60135	65565	67717	60798	58826	65771	64484	69813	85646	74213	72550	85102	13610	83519	11902	96542	65801	84130	108810	85984	78639	73966	63755	sp|Q41188|CSP2_ARATH *-*- Cold shock protein 2 IPR012340 (Nucleic acid-binding, OB-fold) GO:0003676 (nucleic acid binding), GO:0003677 (DNA binding), GO:0006355 (regulation of transcription, DNA-templated)
4	Niben101Scf01402g02022.1	36753	20652	45699	52142	52266	39523	62915	63505	50427	53002	46503	47629	47854	52022	81291	60999	46150	47051	49901	46774	91516	64370	89276	50885	72536	46589	63304	44927	49568	55117	67088	59759	110300	104930	83195	114570	88651	89193	92541	83480	42177	42917	52500	79711	78781	sp|O64740|SC13B_ARATH ***- Protein transport protein SEC13 homolog B IPR015943 (WD40/YVTN repeat-like-containing domain), IPR020472 (G-protein beta WD-40 repeat) GO:0005515 (protein binding)
4	Niben101Scf00339g05026.1	243830	260340	279680	249160	211800	246780	343900	276890	281950	284140	206180	542230	199910	172840	201420	437250	387290	192790	379120	361770	360410	525760	535230	477530	439250	392550	410610	557960	527220	524100	582530	592440	582670	579610	422410	553550	440400	582890	497790	643410	625620	601880	731010	732110	638200	ref|NP_001288856.1| **** mitochondrial outer membrane protein porin 3-like [Brassica rapa] gb|AAS21632.1| voltage-dependent anion-selective channel protein [Brassica rapa] IPR023614 (Porin domain), IPR027246 (Eukaryotic porin/Tom40) GO:0005741 (mitochondrial outer membrane), GO:0006820 (anion transport), GO:0008308 (voltage-gated anion channel activity), GO:0044070 (regulation of anion transport)…
4	Niben101Scf01451g05003.1	48204	81136	24874	69661	84404	85660	104000	81182	67648	93163	74307	71158	48289	22390	25719	90981	88241	80133	117090	106250	103890	129040	141470	123190	102800	105580	109020	127310	106440	128850	151160	172580	158830	152410	218840	47232	179850	196040	207050	115500	115300	118550	195580	200950	236030	sp|Q9LHE5|TO401_ARATH **** Mitochondrial import receptor subunit TOM40-1 IPR023614 (Porin domain), IPR027246 (Eukaryotic porin/Tom40) GO:0005741 (mitochondrial outer membrane), GO:0055085 (transmembrane transport)
4	Niben101Scf00138g01020.1	74272	85048	42503	36934	72351	23673	147870	158400	135770	123150	97906	124880	139350	30638	104690	112110	102160	131380	111050	113670	90733	57282	57576	105020	97184	126450	95528	113980	152100	130910	181280	134200	143950	154220	131700	127080	155430	149720	140480	92248	57010	110710	47700	77151	114120	sp|F4IXW2|BIG5_ARATH **** Brefeldin A-inhibited guanine nucleotide-exchange protein 5 IPR000904 (Sec7 domain), IPR016024 (Armadillo-type fold), IPR023394 (Sec7 domain, alpha orthogonal bundle) GO:0005086 (ARF guanyl-nucleotide exchange factor activity), GO:0005488 (binding), GO:0032012 (regulation of ARF protein signal transduction)
4	Niben101Scf02837g01017.1	48699	197950	90974	305600	86824	108720	199420	72400	374120	71721	92409	193490	74673	162060	82178	102660	112980	200690	114360	78115	247900	327240	147640	250570	262020	319470	225850	299380	275330	293470	219420	323700	141590	396900	211480	311620	295590	257500	294190	280920	320600	242520	253940	349200	372140	sp|P93026|VSR1_ARATH ***- Vacuolar-sorting receptor 1 IPR001881 (EGF-like calcium-binding domain), IPR003137 (Protease-associated domain, PA), IPR026823 (Complement Clr-like EGF domain) GO:0005509 (calcium ion binding)
4	Niben101Scf00571g10001.1	148240	187570	165300	125510	179680	152390	120100	146640	155870	183160	144850	118380	198140	163840	141500	136360	143670	129140	194210	171970	203240	270920	240530	238100	238260	239640	173970	225480	174950	246590	321930	253010	284540	264870	172380	116480	252810	234610	242480	268600	188630	203210	280680	239880	246220	ref|WP_016821513.1| ***- hydrolase [Paenibacillus polymyxa] IPR029058 (Alpha/Beta hydrolase fold)
4	Niben101Scf08250g03016.1	444110	498560	501850	550570	539100	522950	464720	446500	406020	599650	574550	366370	397980	403570	545910	406790	399330	597850	833520	853960	888570	873980	455020	824340	886680	455890	802950	780050	816510	781390	841610	869500	891870	831330	540100	813570	466660	702060	560050	636300	728330	408920	1095500	1078500	970240	sp|P29545|EF1B_ORYSJ **** Elongation factor 1-beta IPR010987 (Glutathione S-transferase, C-terminal-like), IPR014717 (Translation elongation factor EF1B/ribosomal protein S6) GO:0003746 (translation elongation factor activity), GO:0005853 (eukaryotic translation elongation factor 1 complex), GO:0006414 (translational elongation)
4	Niben101Scf03029g01010.1	74980	82307	62961	39869	90472	104930	99780	67902	98177	36125	83866	54228	109360	76482	55714	93775	78895	75297	133880	113920	167570	116320	156180	138270	158010	145940	154940	141570	166980	136120	246120	214530	196930	181920	162870	212080	170340	156840	156040	190100	187310	172240	144180	174230	157810	sp|Q9LI83|ALA10_ARATH *-** Phospholipid-transporting ATPase 10 IPR006539 (P-type ATPase, subfamily IV), IPR008250 (P-type ATPase, A domain) GO:0000166 (nucleotide binding), GO:0000287 (magnesium ion binding), GO:0004012 (phospholipid-translocating ATPase activity), GO:0005524 (ATP binding), GO:0015914 (phospholipid transport), GO:0016021 (integral component of membrane), GO:0046872 (metal ion bin…
4	Niben101Scf03184g01002.1	130370	185220	116610	124460	105860	164240	116720	145800	132560	226060	185460	76255	104490	163230	103260	131040	136820	122250	146180	163920	189020	215270	217670	204070	202060	188110	175720	173750	547840	548120	218770	195970	536900	188560	226990	164390	240730	196520	198760	342390	346560	422250	183320	172870	210730	ref|NP_194330.1| **** RNA-binding KH domain-containing protein PEPPER [Arabidopsis thaliana] emb|CAB39665.1| putative nucleic acid binding protein [Arabidopsis thaliana] emb|CAB79455.1| putative nucleic acid binding protein [Arabidopsis thaliana] gb|AAL07137.1| putative nucleic acid binding protein [Arabidopsis thaliana] gb|AAM20510.1| putative nucleic acid binding protein [Arabidopsis thaliana] …
4	Niben101Scf04436g06002.1	45508	45905	48379	79059	70036	93279	25102	48846	47506	61166	40273	44743	17117	22251	11888	70608	19932	57051	116080	115180	99793	112740	146910	136090	72875	100340	57172	116880	129120	130870	169080	182260	180800	140570	141980	156510	112750	112030	98246	74524	88923	82223	207290	199360	217450	sp|P93847|RL10_SOLME ***- 60S ribosomal protein L10 IPR001197 (Ribosomal protein L10e), IPR016180 (Ribosomal protein L10e/L16) GO:0003735 (structural constituent of ribosome), GO:0005622 (intracellular), GO:0005840 (ribosome), GO:0006412 (translation)
4	Niben101Scf13186g02006.1	691290	445250	489580	393670	473480	570430	462920	645110	624060	501700	481600	602830	308380	268080	379940	564760	528560	592680	895590	862580	863000	784740	811710	791100	622980	559850	782840	541220	637090	585180	616690	834710	914300	713600	1011400	971370	596770	843330	833750	776180	665060	563200	1093200	1139900	1211000	AT4G00880.1 ***- SAUR-like auxin-responsive protein family LENGTH=122 IPR003676 (Auxin-induced protein, ARG7)
4	Niben101Scf02252g01029.1	48664	31331	31035	42234	37820	42941	50613	37688	46489	33579	46241	39950	39848	39320	38340	42701	49449	31737	45494	53131	32346	57630	60039	59464	62780	51860	61065	63181	59761	54943	66852	70811	75678	67275	73156	68961	81523	77042	67069	58121	60602	55960	81266	68314	76478	sp|Q969V3|NCLN_HUMAN ***- Nicalin IPR007484 (Peptidase M28), IPR018247 (EF-Hand 1, calcium-binding site)
4	Niben101Scf17651g00002.1	42397	25507	22353	25232	24820	37622	27489	42076	53386	31686	18552	14874	19509	36061	32327	26602	25322	35144	60443	56727	71744	64654	62177	72103	58479	62691	73212	81371	73900	68996	39409	81861	64173	62421	42769	27346	56214	51139	56336	70039	62994	41592	106990	105040	82325	sp|Q9LVP9|VTI13_ARATH **** Vesicle transport v-SNARE 13 IPR007705 (Vesicle transport v-SNARE, N-terminal), IPR010989 (t-SNARE) GO:0005515 (protein binding), GO:0006886 (intracellular protein transport), GO:0016020 (membrane), GO:0016192 (vesicle-mediated transport)
4	Niben101Scf07672g00014.1	29119	4488.1	3827.3	5986.1	2578.6	894.61	997.94	4798.8	2997	683.04	3470.1	6451.9	36061	5106	7125.4	1120.9	15881	5849.1	53616	50090	49043	23418	26342	13103	46182	48426	41192	29606	38031	36440	34700	36861	39153	39470	17090	25577	6497	31113	18713	36281	34931	34852	59308	59439	52135	sp|O82797|PCNA_TOBAC ***- Proliferating cell nuclear antigen IPR000730 (Proliferating cell nuclear antigen, PCNA) GO:0003677 (DNA binding), GO:0006275 (regulation of DNA replication), GO:0030337 (DNA polymerase processivity factor activity)
4	Niben101Scf32086g00002.1	99527	57164	61286	60957	81820	64773	57346	72087	58396	80421	81486	90819	110240	48541	50190	57632	66975	73545	48519	84967	77030	99259	89017	100360	85176	73918	95956	89794	99710	80143	104780	94153	94065	127190	94026	111500	108680	107540	81698	104070	85465	87807	119330	115590	110640	AT1G34750.1 ***- Protein phosphatase 2C family protein LENGTH=282 IPR001932 (Protein phosphatase 2C (PP2C)-like domain), IPR015655 (Protein phosphatase 2C) GO:0003824 (catalytic activity)
4	Niben101Scf06008g00011.1	16392	20076	33273	17994	17333	18676	26649	16105	13887	17499	16150	12256	20746	18481	18090	11991	17008	24704	216700	211410	780350	344150	30847	37315	184470	142770	140320	139720	115240	145450	156750	135950	133950	471900	20707	329380	13740	167880	281550	536380	568650	456270	544550	466320	38864	ref|NP_001067105.1| ***- product [Oryza sativa Japonica Group] IPR009500 (Protein of unknown function DUF1118)
4	Niben101Scf17635g01019.1	53380	58580	125300	50865	57544	42328	75774	136860	45334	76388	119680	61705	43998	32101	33712	122680	63774	61481	122460	86624	94689	85593	118910	83095	79642	96815	136430	151470	77943	109680	95661	127450	142670	103520	117390	145110	132330	135870	112060	100880	127600	70051	198890	184480	195040	sp|Q6ICB0|DESI1_HUMAN ***- Desumoylating isopeptidase 1 IPR008580 (PPPDE putative peptidase domain)
4	Niben101Scf03326g05014.1	85738	48341	39988	79180	51927	49801	54041	66223	52541	42284	40746	52329	48348	34460	27137	104350	80237	47416	122550	110960	109360	114540	112800	116460	97062	102110	98897	97003	89131	88166	113520	103360	114790	100110	85300	171940	103650	104720	98464	83958	81681	94797	237380	238890	224890	AT3G02900.1 ***- unknown protein; FUNCTIONS IN: molecular_function unknown; INVOLVED IN: biological_process unknown; LOCATED IN: chloroplast; EXPRESSED IN: 22 plant structures; EXPRESSED DURING: 13 growth stages; BEST Arabidopsis thaliana protein match is: unknown protein . LENGTH=162
4	Niben101Scf01018g01010.1	62561	61652	63957	75300	77742	79374	76736	81877	72419	105780	85506	94023	37757	64037	34315	88891	95088	92175	124400	134790	128540	128460	128730	119420	87681	96399	102700	115170	110000	108380	106480	112210	110790	113190	148490	143150	176140	187010	159760	105100	100570	105030	162730	135960	181490	sp|P49098|CYB5_TOBAC ***- Cytochrome b5 IPR001199 (Cytochrome b5-like heme/steroid binding domain) GO:0020037 (heme binding)
4	Niben101Scf04783g03003.1	22506	21138	48616	23368	23839	14463	15341	16983	18130	44673	9985.3	30003	19795	21473	28546	36219	24419	25805	71521	43716	72241	41774	37637	25285	35933	35073	54932	40237	32406	67081	14056	34946	72953	43245	11463	30434	47505	49783	97932	45111	33431	37028	39749	45656	33019	sp|Q67XQ0|Y4424_ARATH ***- DUF21 domain-containing protein IPR000644 (CBS domain), IPR002550 (Domain of unknown function DUF21)
4	Niben101Scf00758g06006.1	75235	85825	45291	77571	86898	57571	95077	104570	98949	66276	79325	83437	74228	71613	76260	92133	92702	85739	116420	123650	112960	138670	118090	113600	119360	119820	65339	118260	115130	111820	132110	136610	137670	126420	134500	151160	138780	128520	129860	108110	129050	118500	128130	118370	127880	sp|B0TC35|SYC_HELMI *-** Cysteine--tRNA ligase IPR004493 (Leucyl-tRNA synthetase, class Ia, archaeal/eukaryotic cytosolic), IPR009080 (Aminoacyl-tRNA synthetase, class 1a, anticodon-binding) GO:0000166 (nucleotide binding), GO:0002161 (aminoacyl-tRNA editing activity), GO:0004812 (aminoacyl-tRNA ligase activity), GO:0004823 (leucine-tRNA ligase activity), GO:0005524 (ATP binding), GO:0005737 (cyt…
4	Niben101Scf01942g04002.1	43207	43694	25131	24341	33545	22887	75522	14001	33697	22832	36494	18788	26266	22691	20830	40902	31820	37623	52769	48121	43012	47324	41999	37949	49586	51085	54729	62631	62634	61163	44056	67165	56931	65392	36239	66178	54403	52903	64600	72874	65407	41643	67850	83799	75669	sp|A4FV54|RAB8A_BOVIN ***- Ras-related protein Rab-8A IPR001806 (Small GTPase superfamily), IPR002041 (Ran GTPase), IPR005225 (Small GTP-binding protein domain), IPR027417 (P-loop containing nucleoside triphosphate hydrolase) GO:0003924 (GTPase activity), GO:0005525 (GTP binding), GO:0005622 (intracellular), GO:0006184 (GTP catabolic process), GO:0006886 (intracellular protein transport), GO:0006…
4	Niben101Scf02740g03006.1	51587	53420	48453	50969	45372	41635	33419	37052	53718	38038	43752	43187	36934	40598	33558	39258	54730	44209	56626	47900	49413	67460	72397	62329	71826	60316	82087	71722	86754	89851	84138	79789	93142	72670	65482	82891	93466	95040	84177	66040	71925	69349	86292	82131	99577	sp|P48724|IF5_PHAVU **** Eukaryotic translation initiation factor 5 IPR002735 (Translation initiation factor IF2/IF5), IPR016024 (Armadillo-type fold) GO:0003743 (translation initiation factor activity), GO:0005488 (binding), GO:0005515 (protein binding), GO:0006413 (translational initiation)
4	Niben101Scf12568g00007.1	95485	365920	69203	83976	157120	111420	62702	343000	217500	279960	109530	79325	39597	46806	209310	194710	115810	183270	169840	215460	445220	228880	311820	180410	172130	460360	407190	212990	437440	419610	486360	430600	459010	205750	173390	456350	140540	337000	285890	379790	337260	405200	384330	318460	273750	AT1G64030.1 ***- serpin 3 LENGTH=385 IPR000215 (Serpin family), IPR023796 (Serpin domain) GO:0005615 (extracellular space)
4	Niben101Scf03915g01008.1	1622.8	30496	26090	73637	63463	69954	57568	12108	52532	40185	83734	82485	42856	46261	46720	213310	77672	160520	209220	32851	63906	63432	94751	250790	78496	204200	253990	252530	164080	115470	247160	83735	245930	250250	56646	34963	34760	49402	158780	138140	329270	140580	365270	201460	179570	sp|P0C5A3|DPNP_ORYSA **** 3'(2'),5'-bisphosphate nucleotidase IPR000760 (Inositol monophosphatase) GO:0006790 (sulfur compound metabolic process), GO:0008441 (3'(2'),5'-bisphosphate nucleotidase activity), GO:0046854 (phosphatidylinositol phosphorylation)
4	Niben101Scf04664g02002.1	43122	17389	14856	11592	11331	5610.6	11254	6180.1	12516	14188	14638	25493	13161	16450	25245	12157	12969	31742	29061	31790	26911	8640.9	19222	8416.8	4460.4	21433	8819.8	22933	19585	23775	32595	22393	41592	24802	31314	38254	32655	27486	11317	24351	8173.2	23385	19508	9115.1	22644	AT4G34660.1 ***- SH3 domain-containing protein LENGTH=368 IPR001452 (SH3 domain), IPR027267 (Arfaptin homology (AH) domain/BAR domain) GO:0005515 (protein binding)
4	Niben101Scf04327g02018.1	6975.1	18550	13509	10923	14970	10505	13667	11806	12127	10640	16940	8374.9	18648	19528	23152	14772	12115	19771	40758	40319	44560	27945	38022	24839	33896	34285	31492	34424	31000	29691	31908	34953	29982	37506	25502	52725	23466	25951	25727	40914	32397	41125	36558	32204	30656	sp|Q41188|CSP2_ARATH *-*- Cold shock protein 2 IPR001878 (Zinc finger, CCHC-type), IPR012340 (Nucleic acid-binding, OB-fold) GO:0003676 (nucleic acid binding), GO:0003677 (DNA binding), GO:0006355 (regulation of transcription, DNA-templated), GO:0008270 (zinc ion binding)
4	Niben101Scf03628g14020.1	15774	36367	18957	45790	37564	52261	33166	17350	33258	30419	39036	56022	32963	198590	42582	55072	23710	26372	3728.6	160680	156960	113760	107850	111360	156440	152050	153740	151850	146470	144550	133850	135730	125530	151180	37229	167690	16473	141970	48042	164780	159790	150010	223000	191340	37696	AT1G26480.1 ***- general regulatory factor 12 LENGTH=268 IPR000308 (14-3-3 protein), IPR023409 (14-3-3 protein, conserved site), IPR023410 (14-3-3 domain) GO:0019904 (protein domain specific binding)
4	Niben101Scf23003g00001.1	35503	34786	33419	41668	66558	39990	34064	28782	38560	41352	58792	76439	43686	29807	38013	41829	61966	37246	51130	63110	55920	70926	53575	58034	50130	61014	55317	55996	35218	57058	60145	41875	50112	57411	85271	63281	65235	68827	44050	41757	54608	73339	61973	54965	68119	sp|Q0WLC7|Y5053_ARATH ***- CBS domain-containing protein CBSCBSPB4 IPR000270 (Phox/Bem1p), IPR000644 (CBS domain) GO:0005515 (protein binding)
4	Niben101Scf01166g01037.1	192920	97855	182750	157770	224800	354450	172800	156580	117190	205220	179300	146170	115150	137430	202060	171260	224490	135380	206370	375050	123770	457230	178630	175120	359130	177900	231010	412770	413530	757800	141740	462600	476070	622500	176870	221790	134230	151040	229570	431400	413890	368650	342020	437830	130640	sp|Q4KMJ1|CHAC2_DANRE ***- Cation transport regulator-like protein 2 IPR006840 (ChaC-like protein), IPR013024 (Butirosin biosynthesis, BtrG-like)
4	Niben101Scf01236g02005.1	26894	53203	7607.7	29080	35321	24694	14186	8897.2	107390	25230	33912	28902	24702	66156	55903	8223.9	12084	19767	109080	101610	80455	76772	62543	50157	43304	59185	66124	61345	111290	123680	164550	14230	42068	118600	82184	66745	25051	78138	29490	192370	101210	226690	28680	187100	31408	sp|Q9SXD8|PPR90_ARATH *-*- Pentatricopeptide repeat-containing protein IPR002885 (Pentatricopeptide repeat), IPR011990 (Tetratricopeptide-like helical domain) GO:0005515 (protein binding)
4	Niben101Scf16795g00015.1	98187	100280	89075	112260	130610	114460	110480	94921	112190	112740	96809	102450	51173	45469	58068	106190	108300	121370	162310	172480	149840	146450	152630	152290	159190	157410	156150	169040	177320	154880	155950	157890	157210	147650	188010	184420	167840	150070	147270	113660	127760	130490	241300	231070	238350	AT5G51545.1 *-*- low psii accumulation2 LENGTH=185
4	Niben101Scf00893g01019.1	181800	168260	88513	166080	22806	162800	94057	91083	98627	78016	155060	88695	91588	115020	101880	43679	68914	89328	120150	131920	144770	182630	184450	184300	169050	162990	154040	187780	187980	178380	190960	191400	192570	211490	191810	218030	60211	131220	57866	200580	192140	177870	201420	200320	213980	AT2G16370.1 **** thymidylate synthase 1 LENGTH=519 IPR000398 (Thymidylate synthase), IPR012262 (Bifunctional dihydrofolate reductase/thymidylate synthase), IPR023451 (Thymidylate synthase/dCMP hydroxymethylase domain), IPR024072 (Dihydrofolate reductase-like domain) GO:0004146 (dihydrofolate reductase activity), GO:0004799 (thymidylate synthase activity), GO:0006231 (dTMP biosynthetic process), G…
4	Niben101Scf05692g07035.1	9701.8	14245	11862	16768	15236	13513	3058.4	328.51	2393.7	17808	17936	18121	5995.5	4754.3	5493.9	22645	22873	19181	23681	22221	26258	11516	11962	12096	24269	24165	23517	19704	18220	18201	18021	15707	813.55	17838	12607	22837	6224.2	18097	13553	15073	13852	12839	31363	36703	40231	AT4G37200.1 ***- Thioredoxin superfamily protein LENGTH=261 IPR005746 (Thioredoxin), IPR012336 (Thioredoxin-like fold) GO:0006662 (glycerol ether metabolic process), GO:0015035 (protein disulfide oxidoreductase activity), GO:0045454 (cell redox homeostasis)
4	Niben101Scf08653g07030.1	28508	17609	34103	37801	24890	39592	38199	13802	54979	19503	54589	51049	45451	51470	56288	10146	51164	56564	44502	59680	54543	72759	72396	63687	49861	57201	56062	96182	104770	104610	107820	97539	103990	92149	115100	133750	105100	82776	93435	99821	94160	101270	71950	81157	81055	AT3G17980.1 **** Calcium-dependent lipid-binding (CaLB domain) family protein LENGTH=177 IPR000008 (C2 domain) GO:0005515 (protein binding)
4	Niben101Scf10150g06006.1	2641.8	288.22	2376.6	582.98	840.37	6120.1	355.65	222.98	1203.7	2075	1160.1	1215.6	6895.8	5709.1	8245.1	888.06	138.3	909.62	19207	23339	19211	10389	11666	11760	20570	17083	23303	19784	17093	16744	20767	19707	20435	12275	416.29	15901	1371.3	19462	7219.9	29030	26775	29272	37151	39316	26490	AT2G35605.1 ***- SWIB/MDM2 domain superfamily protein LENGTH=109 IPR003121 (SWIB/MDM2 domain) GO:0005515 (protein binding)
4	Niben101Scf01374g15015.1	456.22	10408	9003.2	7901.9	7350.7	4668.2	9661.2	9004.8	4954.7	7237.4	4019.2	5582.9	9203.4	9041.2	7023.9	7911.1	52564	99645	74683	75308	67821	25622	33548	34120	54248	61845	29466	67665	36862	61150	51418	77746	34556	34633	6430.8	81951	8595.8	125850	109950	42333	135140	102640	13905	143740	30025	sp|Q55C58|VPS16_DICDI *-*- Vacuolar protein sorting-associated protein 16 homolog IPR016534 (Vacuolar protein sorting-associated protein 16) GO:0005737 (cytoplasm), GO:0006886 (intracellular protein transport)
4	Niben101Scf00684g00002.1	224090	291660	213000	217080	194140	194900	190390	192260	194710	286960	273500	259260	179640	193170	200060	161050	281950	199590	307110	312460	244250	303540	302670	277190	283710	282120	282340	338950	322770	256220	357650	367910	370190	343260	243940	313630	317580	332820	324770	355870	373120	309910	409400	375040	411790	sp|P51153|RAB13_HUMAN ***- Ras-related protein Rab-13 IPR001806 (Small GTPase superfamily), IPR002041 (Ran GTPase), IPR005225 (Small GTP-binding protein domain), IPR024156 (Small GTPase superfamily, ARF type), IPR027417 (P-loop containing nucleoside triphosphate hydrolase) GO:0003924 (GTPase activity), GO:0005525 (GTP binding), GO:0005622 (intracellular), GO:0006184 (GTP catabolic process), GO:00…
4	Niben101Scf05449g01006.1	19093	20724	19546	19450	20881	1155.1	8157.2	670.51	2644.6	12146	15928	15554	11399	11891	13594	17085	18794	1021.5	12600	14162	15412	17109	13388	20585	18078	18734	19359	19102	20704	18782	23020	22311	23123	21781	17444	17475	19074	18300	20380	16596	13577	2178.9	19306	21808	15984	Unknown protein
4	Niben101Scf03993g03013.1	3666.2	8717.3	4094.2	3097.4	5165.3	5621.1	4412.6	2827.4	6027.1	3029.5	3737.7	4146.1	6055.9	5751.8	2795.9	5007.9	14856	13282	9735.2	7952.3	5062.5	3491.4	12069	15171	10990	7906.5	6739.7	13502	12533	4220	14797	4317.6	8077.3	11872	11921	11321	7328.9	6338.9	3989.2	9503.6	4528.6	7732.7	17033	16473	13031	sp|Q9M376|VA727_ARATH **** Vesicle-associated membrane protein 727 IPR001388 (Synaptobrevin), IPR011012 (Longin-like domain) GO:0006810 (transport), GO:0016021 (integral component of membrane), GO:0016192 (vesicle-mediated transport)
4	Niben101Scf08926g01025.1	49524	38111	28818	7096.7	32744	26806	28193	72934	26194	25719	32265	33710	24897	30641	43753	41469	38010	36181	43280	40051	37768	65998	66433	69971	55657	59146	49943	69585	60197	61861	83144	68472	68689	90772	90096	93740	68862	56339	60164	4855.1	55852	62793	54634	53646	54514	sp|Q9FIH9|CML37_ARATH **** Calcium-binding protein CML37 IPR011992 (EF-hand domain pair) GO:0005509 (calcium ion binding)
4	Niben101Scf00317g06018.1	2562.9	3257.2	14228	2509.5	868.06	12503	16893	2820.8	1828.8	2576.4	1561.2	3143.6	13151	7269.7	2779.8	20173	2733.6	15970	20947	17975	20497	13201	1680.5	6805	19290	17883	19222	17876	18241	14426	15689	14721	13222	7116	13493	12710	12486	9702.8	19950	17184	16570	15205	21772	23857	17176	sp|P40855|PEX19_HUMAN *-*- Peroxisomal biogenesis factor 19 IPR006708 (Pex19 protein) GO:0005777 (peroxisome)
4	Niben101Scf04240g00008.1	54372	50464	39497	52415	53557	62040	64459	57300	50139	118610	56097	63236	50809	87544	50949	136450	52631	53431	68148	76500	50821	81239	98455	81721	98083	72732	123280	89320	75880	106100	98803	115010	107950	120620	41008	81985	118070	85352	99465	90188	81569	94085	85116	61961	86417	sp|C4XGC2|NQOR_DESMR ***- NAD(P)H dehydrogenase (quinone) IPR010089 (Flavoprotein WrbA), IPR029039 (Flavoprotein-like) GO:0010181 (FMN binding), GO:0016491 (oxidoreductase activity), GO:0045892 (negative regulation of transcription, DNA-templated)
4	Niben101Scf11480g02007.1	104960	122580	61576	38151	39981	69514	35927	42868	78730	52221	72892	54573	41464	31777	24455	30744	67788	40913	68910	52309	72613	40810	52218	23778	26096	56765	26901	130400	106880	101510	122040	120160	97211	143500	96453	82658	84817	56127	54714	60919	74314	70118	63821	64497	59667	sp|Q9XGI7|NAS_SOLLC **** Nicotianamine synthase IPR004298 (Nicotianamine synthase), IPR029063 (S-adenosyl-L-methionine-dependent methyltransferase) GO:0030410 (nicotianamine synthase activity), GO:0030418 (nicotianamine biosynthetic process)
4	Niben101Scf10048g02013.1	493530	600090	523510	618420	607750	610940	444320	448640	442670	727870	694770	673800	290120	277100	305260	739490	711300	740600	1148600	1014300	1087000	716850	725520	707900	885730	952940	878310	951490	996650	975370	800140	850170	834810	1014300	1006600	1245300	903190	1080500	1073900	718200	723770	749850	995070	962650	1019400	sp|Q85A24|CYB6_ANTFO **** Cytochrome b6 IPR016174 (Di-haem cytochrome, transmembrane), IPR023530 (Cytochrome b6, PetB), IPR027387 (Cytochrome b/b6-like domain) GO:0005506 (iron ion binding), GO:0009055 (electron carrier activity), GO:0016020 (membrane), GO:0016021 (integral component of membrane), GO:0016491 (oxidoreductase activity), GO:0020037 (heme binding), GO:0022900 (electron transport chai…
4	Niben101Scf12404g00002.1	190780	381400	29424	230720	53281	238320	26191	63713	57470	161750	145720	36575	95808	30674	53770	140530	263580	156980	157170	166030	167410	191780	186730	189890	168140	170470	173330	260230	235100	211430	242990	274790	272660	230330	311370	220570	221350	181700	196240	250210	193580	286030	189210	185680	194100	sp|Q2KXH8|RL28_BORA1 *-*- 50S ribosomal protein L28 IPR001383 (Ribosomal protein L28), IPR026569 (Ribosomal protein L28/L24) GO:0003735 (structural constituent of ribosome), GO:0005622 (intracellular), GO:0005840 (ribosome), GO:0006412 (translation)
4	Niben101Scf01478g08020.1	8527.3	8901.1	35584	12609	25975	32692	4605.8	60231	49412	11716	6322.9	19837	20693	17648	7308.4	4840.5	24547	37841	64064	50629	60252	115390	75919	68621	58648	94727	54342	109300	79459	70575	85349	83741	87622	77846	74681	69779	84735	80365	79216	61702	63542	74314	112860	105930	107790	AT5G08580.1 **** Calcium-binding EF hand family protein LENGTH=391 IPR011992 (EF-hand domain pair) GO:0005509 (calcium ion binding)
4	Niben101Scf06105g01001.1	27745	62106	61910	84776	83795	74085	30869	34348	40243	70547	64982	57073	40568	50842	37052	54568	49533	52496	99306	98785	104130	68590	88838	77005	77744	81084	77225	97707	94712	91220	145510	138710	142090	114130	89808	130070	33717	103410	82883	88386	85455	49840	143090	146020	135060	sp|P35685|RL7A_ORYSJ ***- 60S ribosomal protein L7a IPR018492 (Ribosomal protein L7Ae/L8/Nhp2 family), IPR029064 (50S ribosomal protein L30e-like) GO:0030529 (ribonucleoprotein complex), GO:0042254 (ribosome biogenesis)
4	Niben101Scf04827g03005.1	7396.9	18008	67088	19099	24517	17942	19127	19799	20933	21377	20526	20933	1856.1	10815	8571.7	64924	27621	26701	39139	37175	38593	57949	46182	46314	42661	37581	42821	44330	41301	43183	36914	41841	41297	49019	72403	40700	45263	47421	38930	34130	38586	31376	57899	53449	58456	sp|Q96321|IMA1_ARATH ***- Importin subunit alpha-1 IPR002652 (Importin-alpha, importin-beta-binding domain), IPR016024 (Armadillo-type fold), IPR024931 (Importin subunit alpha) GO:0005488 (binding), GO:0005515 (protein binding), GO:0005634 (nucleus), GO:0005737 (cytoplasm), GO:0006606 (protein import into nucleus), GO:0008565 (protein transporter activity)
4	Niben101Scf05304g01011.1	47670	35958	50860	50518	37700	46514	38069	82460	67964	44489	53060	48531	18700	87212	28188	41773	51473	46498	75016	80192	56931	98099	114980	55525	72895	92549	90454	38792	21374	82238	103990	117460	109230	110710	69996	84588	97017	103760	103510	34913	80923	82643	89306	99380	107160	sp|Q67IX6|PDI14_ORYSJ **** Protein disulfide isomerase-like 1-4 IPR005792 (Protein disulphide isomerase), IPR012336 (Thioredoxin-like fold) GO:0005783 (endoplasmic reticulum), GO:0016853 (isomerase activity), GO:0045454 (cell redox homeostasis)
4	Niben101Scf03039g01017.1	41431	53977	41927	34877	32099	45400	32568	97636	79764	50544	108540	47489	98592	75445	74457	30639	22653	15482	43594	1155200	26120	42502	285410	1120000	1202500	28445	27321	28033	21751	29247	1230900	1226100	1195100	30042	21125	281180	47541	213470	115110	1209800	1012200	908800	1296800	1215300	13647	sp|A3CK48|VATA_STRSV **** V-type ATP synthase alpha chain IPR005725 (ATPase, V1 complex, subunit A), IPR027417 (P-loop containing nucleoside triphosphate hydrolase) GO:0005524 (ATP binding), GO:0015991 (ATP hydrolysis coupled proton transport), GO:0015992 (proton transport), GO:0016820 (hydrolase activity, acting on acid anhydrides, catalyzing transmembrane movement of substances), GO:0033178 (pr…
4	Niben101Scf00270g10002.1	10121	17833	15036	14922	20191	21181	18060	23433	17774	18378	16956	2945.5	12449	8058.8	6348.6	15712	19125	21591	34670	33388	42250	38589	4019.7	36910	33266	33890	36360	33849	28371	29143	38281	36044	31120	32095	40420	36112	37068	34599	36568	29702	5162.5	28204	40090	39868	44204	ref|XP_002289915.1| **** ran binding protein 7 [Thalassi 7 [Thalassiosira pseudonana CCMP1335] IPR016024 (Armadillo-type fold) GO:0005488 (binding), GO:0006886 (intracellular protein transport), GO:0008536 (Ran GTPase binding)
4	Niben101Scf05349g01011.1	2590700	2381200	2419900	2880400	2774500	2816600	2438200	2461800	2609700	4027400	3826200	3777400	919650	888150	957280	4524300	4594300	4497400	7355700	7410700	7428700	8127000	8230100	7979400	6375500	6100100	6400000	9362500	9158500	9197000	8750300	8513000	8492400	8218000	8935300	9591900	7372400	6528500	6815100	3589900	3510700	3746200	13157000	12918000	13867000	sp|P04782|CB24_PETSP *-*- Chlorophyll a-b binding protein 25, chloroplastic IPR022796 (Chlorophyll A-B binding protein), IPR023329 (Chlorophyll a/b binding protein domain) GO:0009765 (photosynthesis, light harvesting), GO:0016020 (membrane)
4	Niben101Scf02366g06014.1	217700	119540	116960	81852	123080	201890	97644	156780	117480	109570	165470	172950	126290	93879	117880	121640	129770	123470	292850	206400	218770	220670	315630	228110	192330	269240	279150	236230	225460	267960	246280	186460	187930	208370	297720	252150	254520	257320	346740	219480	215130	206020	368490	401880	346250	sp|Q96300|14337_ARATH ***- 14-3-3-like protein GF14 nu IPR000308 (14-3-3 protein), IPR023409 (14-3-3 protein, conserved site), IPR023410 (14-3-3 domain) GO:0019904 (protein domain specific binding)
4	Niben101Scf02290g07003.1	43931	39766	46233	17793	39670	25952	25067	49624	57631	46613	50926	48837	33404	36978	15624	31153	23406	30785	82548	53479	57748	48509	68781	43403	40516	54552	51843	47950	59881	49350	75611	60619	65475	59604	63037	80825	82254	82583	82258	51364	67692	65619	76393	70700	82590	sp|O35685|NUDC_MOUSE *-*- Nuclear migration protein nudC IPR008978 (HSP20-like chaperone)
4	Niben101Scf02541g10005.1	50059	39513	39153	33803	46357	39045	47973	61523	72612	76968	68830	62343	39904	44758	38857	65630	67864	60417	88268	72729	79152	82038	104880	88771	71945	77085	79145	62282	76659	73975	76599	69281	73806	71980	96827	87920	112060	107650	104920	63216	60607	52535	68609	67594	72808	tpg|DAA40887.1| ***- TPA: hypothetical protein ZEAMMB73_782543 [Zea mays]
4	Niben101Scf02573g02001.1	11768	4863.7	7681.5	4771.2	8712.8	1545.1	5214.4	8920.8	11346	7689.7	10463	4421.5	8635.3	9147.8	11919	6096.8	9906.6	5647.7	12515	11784	14209	10663	10391	16829	11579	13812	9389	17983	14834	13003	8462.8	23724	26559	11736	11815	15626	7345.8	20163	19050	16735	12683	13679	29505	23711	27643	ref|XP_007047826.1| ***- Folic acid and derivative biosynthetic process, putative [Theobroma cacao] gb|EOX91983.1| Folic acid and derivative biosynthetic process, putative [Theobroma cacao] IPR005645 (Serine hydrolase FSH), IPR029058 (Alpha/Beta hydrolase fold)
4	Niben101Scf06091g08011.1	26304	12225	26670	27864	104560	27368	17793	29335	24460	20514	18101	33481	23043	30124	32572	36009	28432	28977	52137	52513	48973	65275	67614	62698	74391	64019	60835	87349	75663	75600	85805	81366	79420	88366	90776	105070	64500	28974	70733	71015	61077	65258	69821	53988	74953	sp|Q9LVZ8|LOR12_ARATH ***- Protein LURP-one-related 12 IPR025659 (Tubby C-terminal-like domain)
4	Niben101Scf04995g11014.1	62472	66046	171880	86088	99777	83964	79051	73641	70581	43394	41636	49328	75602	54595	95751	61939	46304	106170	84737	140360	127860	132510	123600	74332	153230	164740	215190	179550	168330	204910	240270	215780	239950	224840	225320	239400	234570	197630	199570	199770	161920	191900	168360	168640	186480	AT3G28740.1 *-*- Cytochrome P450 superfamily protein LENGTH=509 IPR001128 (Cytochrome P450) GO:0005506 (iron ion binding), GO:0016705 (oxidoreductase activity, acting on paired donors, with incorporation or reduction of molecular oxygen), GO:0020037 (heme binding), GO:0055114 (oxidation-reduction process)
4	Niben101Scf00477g00017.1	73551	73217	75146	63734	73734	70596	76050	83007	81371	80153	73860	74730	88467	87045	89070	71185	77845	68862	105520	111160	118100	123600	130740	120700	102300	110060	98252	82452	132220	83658	95663	92368	93201	85276	97432	136550	149510	141070	154940	133210	133930	124980	74920	79904	83657	sp|Q96299|14339_ARATH ***- 14-3-3-like protein GF14 mu IPR000308 (14-3-3 protein), IPR023409 (14-3-3 protein, conserved site), IPR023410 (14-3-3 domain) GO:0019904 (protein domain specific binding)
4	Niben101Scf03422g04001.1	14107	19326	37012	23502	54832	74602	82590	88768	89533	10136	35260	9771.6	18361	48786	20995	28146	111020	13047	101040	36893	23725	8617.9	63064	18936	17867	10090	10342	521940	519340	520160	535850	449770	434510	415200	90295	37614	114490	99110	110930	443810	22534	70961	384400	395630	3933	sp|B0SW60|RUTB_CAUSK ***- Peroxyureidoacrylate/ureidoacrylate amidohydrolase RutB IPR000868 (Isochorismatase-like) GO:0003824 (catalytic activity), GO:0008152 (metabolic process)
4	Niben101Scf03069g01001.1	52880	46193	62830	82316	26168	30892	39069	73202	96189	94595	67759	51913	94175	50100	8773.1	110730	56666	61768	89318	82517	88428	115240	95617	109680	74023	76789	64910	92775	96946	83834	85947	88947	92219	85890	93281	106120	103220	92699	100470	75221	62637	70245	129360	131170	121130	AT1G12310.1 **** Calcium-binding EF-hand family protein LENGTH=148 IPR011992 (EF-hand domain pair) GO:0005509 (calcium ion binding)
4	Niben101Scf00484g01006.1	19716	18491	3949.2	16992	17289	17490	14981	15951	1576.8	18740	838.83	17783	2287.9	24378	7500.6	31506	13506	16678	7130.6	55080	36113	36853	50983	12328	39051	53276	6944.4	7880.1	54725	47612	34170	33049	44949	44519	13449	54929	486.44	20862	3460.5	66962	61345	33588	69759	62966	67027	sp|O49044|SODC2_MESCR **** Superoxide dismutase [Cu-Zn] 2 IPR001424 (Superoxide dismutase, copper/zinc binding domain) GO:0004784 (superoxide dismutase activity), GO:0006801 (superoxide metabolic process), GO:0046872 (metal ion binding), GO:0055114 (oxidation-reduction process)
4	Niben101Scf05295g05010.1	57646	127370	130490	118300	46243	31253	70573	60177	40121	39337	34862	35867	73434	46037	58501	32188	47235	47311	62073	62783	110870	99069	71724	107420	80711	104020	61573	92057	68180	58925	37725	63788	57055	63613	68970	67084	83426	94162	90622	79774	70685	72158	79971	75002	92516	sp|Q8KAE1|PGK_CHLTE **** Phosphoglycerate kinase IPR001576 (Phosphoglycerate kinase) GO:0004618 (phosphoglycerate kinase activity), GO:0006096 (glycolytic process)
4	Niben101Scf03170g04002.1	29815	33089	26401	31400	46229	17946	35913	26949	38382	26708	19575	24374	39561	23269	13037	17658	33475	29147	22510	36870	22620	15930	50637	42913	49190	46826	31019	78355	63764	84354	90798	84030	105720	68374	56951	58385	51916	65728	71983	63187	68665	39203	62343	72608	70844	AT5G07990.1 ***- Cytochrome P450 superfamily protein LENGTH=513 IPR001128 (Cytochrome P450) GO:0005506 (iron ion binding), GO:0016705 (oxidoreductase activity, acting on paired donors, with incorporation or reduction of molecular oxygen), GO:0020037 (heme binding), GO:0055114 (oxidation-reduction process)
4	Niben101Scf05405g05004.1	734.36	3450.6	24902	2122.2	1864.7	3097.3	1304	1466.3	8519.8	2655.2	954.67	1993.3	2025.6	31963	940.94	28085	5120.1	2116.4	27205	38136	28371	42586	5213.8	3078	23720	40787	33740	58894	32828	39071	40800	43382	18828	8592.8	1887.1	3838.2	3629.3	1357	18486	50027	62333	62485	27291	57525	8605.2	AT2G37180.1 ***- Aquaporin-like superfamily protein LENGTH=285 IPR000425 (Major intrinsic protein), IPR023271 (Aquaporin-like) GO:0005215 (transporter activity), GO:0006810 (transport), GO:0016020 (membrane)
4	Niben101Scf02235g04024.1	6384.8	7916.7	910.19	7029.3	360.55	5756	20393	17001	10509	4362.5	16513	6090.3	9221.9	4509.1	9081.9	2260.6	2265.6	1269.3	19978	20335	21535	22170	19581	22429	23093	21092	23591	20451	16456	22119	16459	18735	15478	21011	1081.4	66862	13617	40359	9661.7	26718	23356	34169	46286	15488	38561	sp|A4QL94|ATPI_LEPVR **** ATP synthase subunit a, chloroplastic IPR000568 (ATPase, F0 complex, subunit A), IPR001865 (Ribosomal protein S2), IPR023591 (Ribosomal protein S2, flavodoxin-like domain) GO:0003735 (structural constituent of ribosome), GO:0005622 (intracellular), GO:0005840 (ribosome), GO:0006412 (translation), GO:0015078 (hydrogen ion transmembrane transporter activity), GO:0015935 (s…
4	Niben101Scf05487g01009.1	20431	49152	50590	31565	58817	72312	45663	25587	25285	71099	36845	75879	62756	7267.6	70038	45401	72436	17966	58662	93233	58444	107790	69262	71048	69430	72663	106070	78296	77226	125420	76499	23424	114400	11419	52028	80366	39876	108210	39820	76789	165850	71901	99031	50735	89875	sp|P37218|H1_SOLLC *-*- Histone H1 IPR005819 (Histone H5) GO:0000786 (nucleosome), GO:0003677 (DNA binding), GO:0005634 (nucleus), GO:0006334 (nucleosome assembly)
4	Niben101Scf00428g07007.1	24598	2465.2	2739.4	29950	960.19	2730.1	1075.6	2960.2	2230.3	24866	548.81	22077	1028.7	2002.5	3109.4	2115.1	20818	3671.8	27380	28827	27597	29674	23993	27257	28275	26654	27942	22944	22960	21715	28047	30341	27218	27213	1289.8	10422	256.46	39738	34638	26231	25990	21601	34483	33405	16764	sp|P23444|H1_MAIZE *-*- Histone H1 IPR011991 (Winged helix-turn-helix DNA-binding domain), IPR020478 (AT hook-like) GO:0000786 (nucleosome), GO:0003677 (DNA binding), GO:0005634 (nucleus), GO:0006334 (nucleosome assembly)
4	Niben101Scf03930g00019.1	15215	7719	10968	8045.6	6584.9	9797.6	6391.9	17612	8198.1	6022.9	2323.6	18040	15355	3140.3	6005.3	2567.8	3967.7	7677.6	11959	11202	15064	14699	13036	15103	13583	11984	10478	19414	12215	12652	13781	13275	14685	20271	34583	40070	18849	7977.4	15464	21842	3942.2	20344	11661	11816	7205.7	sp|Q9XI36|MBD10_ARATH *-** Methyl-CpG-binding domain-containing protein 10 IPR016177 (DNA-binding domain) GO:0003677 (DNA binding), GO:0005634 (nucleus)
4	Niben101Scf00163g17005.1	35807	39000	31924	28871	25810	16874	21474	11659	32525	20416	13583	23856	20147	62710	20685	31090	15081	31702	37350	42958	39269	42837	37392	44238	41802	45141	51939	41077	45222	43055	42412	45413	41963	41292	36625	49720	52127	41407	43789	30519	36901	56540	41346	44707	45327	sp|B6IS04|MSRA_RHOCS **** Peptide methionine sulfoxide reductase MsrA IPR002569 (Peptide methionine sulphoxide reductase MsrA), IPR028427 (Peptide methionine sulfoxide reductase) GO:0006979 (response to oxidative stress), GO:0008113 (peptide-methionine (S)-S-oxide reductase activity), GO:0016671 (oxidoreductase activity, acting on a sulfur group of donors, disulfide as acceptor), GO:0030091 (prot…
4	Niben101Scf00782g01005.1	2730.2	1799.5	425.19	14554	2715.4	1372	560.04	826.41	1386.3	1180.1	3547.5	3941.1	1366.1	1505.5	1530.2	2392.9	536.54	2525.5	19829	10655	20058	12693	10800	3388	16289	17732	18979	12216	13903	15174	16958	13817	16502	4315	837.8	24691	345.53	32416	2378.4	22133	41208	32420	5520.1	39840	45750	sp|Q9D020|5NT3A_MOUSE **** Cytosolic 5'-nucleotidase 3A IPR006434 (Pyrimidine 5'-nucleotidase, eukaryotic), IPR023214 (HAD-like domain) GO:0000287 (magnesium ion binding), GO:0005737 (cytoplasm), GO:0008253 (5'-nucleotidase activity)
4	Niben101Scf02828g00004.1	394700	384530	384690	432920	445680	452960	396280	417410	417130	433110	396310	403710	220990	219810	262510	472430	480410	465400	680870	658870	704490	706140	769550	695450	671620	680160	679770	782370	690510	699600	796850	742490	783380	753480	789190	911430	995720	1069300	1138400	800350	819000	837780	1043900	1100600	1175200	sp|A9M837|ATPB_BRUC2 **** ATP synthase subunit beta IPR005722 (ATPase, F1 complex, beta subunit), IPR020971 (ATP synthase, F1 beta subunit), IPR027417 (P-loop containing nucleoside triphosphate hydrolase) GO:0000275 (mitochondrial proton-transporting ATP synthase complex, catalytic core F(1)), GO:0005524 (ATP binding), GO:0006200 (ATP catabolic process), GO:0006754 (ATP biosynthetic process), GO:…
4	Niben101Scf06799g01001.1	767.19	12799	4239.1	1943.2	1555.7	3598.7	2064.1	985.53	552.28	1810.4	619.41	2023.6	2536.4	4071.7	1490	2363.8	2530.1	2906.5	9336.8	9343.8	32547	27094	8968.6	9923.5	36364	41353	8273.3	38802	14656	30957	14462	24558	30887	7457.5	1402.5	5589.4	21172	2989.6	2234.7	45137	43739	44985	6683.9	41704	5768.4	sp|P22233|SODC_SPIOL *-** Superoxide dismutase [Cu-Zn] IPR001424 (Superoxide dismutase, copper/zinc binding domain) GO:0004784 (superoxide dismutase activity), GO:0006801 (superoxide metabolic process), GO:0046872 (metal ion binding), GO:0055114 (oxidation-reduction process)
4	Niben101Scf07226g01001.1	1045.4	2252	3420.8	2838.2	441.28	2075.9	2774.8	2223	931.62	2058.2	1356.6	736.17	766.31	3512.2	1783.5	549.83	1244.6	1092	703.4	17251	14109	7381.5	511.39	7667.6	15398	15055	875.66	12042	12399	13053	14181	15576	13498	16435	328.87	2755.8	640.49	2649.8	2728	16915	14557	15268	24159	22923	2595.8	AT2G35605.1 ***- SWIB/MDM2 domain superfamily protein LENGTH=109 IPR003121 (SWIB/MDM2 domain) GO:0005515 (protein binding)
4	Niben101Scf07842g00010.1	20415	13823	25617	22610	11941	17009	17222	21598	16037	34460	47576	51263	6152.4	6053.3	7398.8	37822	42219	38004	43402	44025	40924	41323	49304	43439	33106	31912	42329	59315	51155	51012	54310	55277	61845	70804	64389	68805	76911	74857	77558	50890	46555	47495	60220	61069	66444	sp|P40934|CYB5_BRAOB ***- Cytochrome b5 IPR001199 (Cytochrome b5-like heme/steroid binding domain) GO:0020037 (heme binding)
4	Niben101Scf02461g01005.1	52570	10132	7633.2	139790	12088	12589	9815.8	7037.8	9761.5	4885.7	58412	7217.1	59282	5485.8	13246	13925	13142	769.86	57862	68957	47423	52655	231390	65023	20281	35119	21281	21314	105630	108820	118130	61947	49906	117490	13525	23158	82963	70780	72214	113880	64514	71704	136840	115880	70093	AT3G12800.1 **** short-chain dehydrogenase-reductase B LENGTH=298 IPR002347 (Glucose/ribitol dehydrogenase) GO:0008152 (metabolic process), GO:0016491 (oxidoreductase activity)
4	Niben101Scf00777g04013.1	30416	2197.1	22995	10958	32339	15086	1278.2	9482.2	9793.2	35389	2448.8	966.54	53634	48954	55087	1356.2	9982.5	2042.9	126380	126030	127100	135170	132570	127480	130930	128070	124890	136000	116750	124380	130380	120950	126020	131650	11758	113660	7740.6	111910	79285	157360	152170	163880	161800	168450	144160	sp|P82715|PPD5_ARATH *-*- PsbP domain-containing protein 5, chloroplastic IPR016123 (Mog1/PsbP, alpha/beta/alpha sandwich)
4	Niben101Scf00199g01002.1	11649	6445.1	18549	23794	17164	5258.8	28803	8232.3	22888	23548	2641.7	17337	57655	6911.3	4436.9	3859.7	7441.9	7566.5	44685	47638	38738	51559	10578	48546	46705	19746	24445	40160	52127	41080	15320	41611	49862	41702	12501	111220	22711	105150	19573	32709	14379	33700	35485	17398	20281	sp|Q0WRX3|SCP40_ARATH **** Serine carboxypeptidase-like 40 IPR001563 (Peptidase S10, serine carboxypeptidase), IPR029058 (Alpha/Beta hydrolase fold) GO:0004185 (serine-type carboxypeptidase activity), GO:0006508 (proteolysis)
4	Niben101Scf00920g01006.1	3045.1	3154.5	3121.8	2426.6	839.31	1148.7	2888.3	2752.9	3313.8	1597.6	881.49	1689.6	1365.1	1565	4828	2261.3	1908.7	2355.1	3972	5413.1	3907.4	5160.8	2123.2	3791.5	3956.6	3913.8	4897.2	5301.4	4520.9	4576.9	3383	5641.2	5137.1	3714	4015	4960.4	1527	3055.3	4179.6	4816.2	6094.3	4210.3	5106.1	2420.6	3651.8	sp|Q8CI11|GNL3_MOUSE *-** Guanine nucleotide-binding protein-like 3 IPR006073 (GTP binding domain), IPR014813 (Guanine nucleotide-binding protein-like 3, N-terminal domain), IPR023179 (GTP-binding protein, orthogonal bundle domain), IPR027417 (P-loop containing nucleoside triphosphate hydrolase) GO:0005525 (GTP binding)
4	Niben101Scf16332g01008.1	16035	16937	15192	15287	18806	10753	43531	16998	15069	38783	20600	17777	14400	9138.6	40135	20027	22548	9022.8	29367	24708	19209	28468	29037	26797	21988	22388	20466	31437	23788	26065	23905	33191	30736	32753	34726	32407	36313	30908	28650	19450	16170	18283	38245	34161	41436	AT5G64816.1 ***- unknown protein; Has 30201 Blast hits to 17322 proteins in 780 species: Archae - 12; Bacteria - 1396; Metazoa - 17338; Fungi - 3422; Plants - 5037; Viruses - 0; Other Eukaryotes - 2996 (source: NCBI BLink). LENGTH=130
4	Niben101Scf00069g11022.1	5501.4	22202	17316	12930	30842	15511	25082	20135	24630	9386.8	11263	4643.9	26999	8810	18717	12502	43044	9568.9	27765	27975	8494.6	46065	53038	46106	8288.3	10071	35083	37850	32611	32871	28094	27351	12996	30126	41301	40560	44792	36679	21215	20486	8481.4	24090	67154	67738	76316	ref|NP_001046594.1| *-*- product [Oryza sativa Japonica Group]
4	Niben101Scf08895g01018.1	14893	18985	12339	18328	19826	20365	11741	15453	15233	17984	17340	16632	11281	17320	9338.3	16045	13779	13604	29474	29533	33194	15317	18130	17294	27353	24147	29108	17093	16737	19540	20399	17466	19971	23505	25831	23054	28030	42526	43456	12850	13140	14546	27799	25075	53443	sp|Q4L5B9|MNTH_STAHJ **** Divalent metal cation transporter MntH IPR001046 (NRAMP family) GO:0005215 (transporter activity), GO:0006810 (transport), GO:0016020 (membrane)
4	Niben101Scf02253g03005.1	58003	72265	66588	52262	77254	57111	113760	92592	65401	100230	76833	24774	137740	116930	134360	72451	112250	90296	104120	101960	114080	136930	103880	121810	100790	94756	96861	130600	115150	125180	131720	125650	139290	117580	192770	142760	150440	146940	150520	103220	123600	131030	134040	138650	124480	AT5G62540.1 ***- ubiquitin-conjugating enzyme 3 LENGTH=150 IPR016135 (Ubiquitin-conjugating enzyme/RWD-like), IPR023313 (Ubiquitin-conjugating enzyme, active site)
4	Niben101Scf08057g00006.1	9923.3	57469	13669	18064	7972.8	28056	23696	7084.3	9444.8	136060	18202	15557	41314	18423	43233	64840	24009	164740	59807	60251	64719	74586	69606	70363	77305	85584	74151	101120	102010	106660	129820	124580	120400	125350	194240	181910	26888	93178	86348	97383	92176	93702	82869	83762	25942	sp|Q9LQU4|PCR2_ARATH ***- Protein PLANT CADMIUM RESISTANCE 2 IPR006461 (Uncharacterised protein family Cys-rich)
4	Niben101Scf01241g02001.1	6424.7	7052.5	4107.2	3439.7	4356.5	5966.6	3603.6	3321.9	3489.7	4121.3	4210	4322.6	3584.5	4622.2	10727	4048.7	5043.3	4083.4	32578	31426	29871	32284	34786	34576	24163	25216	26055	33758	31775	31729	26319	22044	21007	24094	3558.3	6077.2	7257.8	9264.5	8607.1	40338	37971	29228	37489	38106	15021	emb|CAA65045.1| --*- defensin [Capsicum annuum]
4	Niben101Scf02652g01029.1	48654	35003	44187	37091	61003	38446	35403	90750	33962	46988	55489	61308	112070	48586	35576	72089	71965	62189	81192	82137	86691	115460	125340	121660	81564	88926	84717	95112	96311	102520	114350	116620	108310	98875	121460	103500	83402	52567	77647	10398	54319	63366	138880	148650	162100	sp|Q5HRM8|CLPC_STAEQ *-*- ATP-dependent Clp protease ATP-binding subunit ClpC IPR004176 (Clp, N-terminal), IPR023150 (Double Clp-N motif) GO:0019538 (protein metabolic process)
4	Niben101Scf07616g00008.1	12484	30543	29604	29892	23653	30804	32188	33523	27012	29467	28514	29320	12871	20343	23145	35098	14613	32212	24259	27083	29912	37351	37441	38778	36611	33216	40876	52218	37606	39090	50851	40283	42373	43092	37766	48468	40051	37701	41622	16331	29524	32076	46356	47124	42835	AT1G35670.1 **** calcium-dependent protein kinase 2 LENGTH=495 IPR011009 (Protein kinase-like domain), IPR011992 (EF-hand domain pair) GO:0004672 (protein kinase activity), GO:0004674 (protein serine/threonine kinase activity), GO:0005509 (calcium ion binding), GO:0005524 (ATP binding), GO:0006468 (protein phosphorylation), GO:0016772 (transferase activity, transferring phosphorus-containing grou…
4	Niben101Scf34114g00003.1	15778	41507	18612	20891	17690	16963	16321	16735	54378	30439	15323	123990	16013	19778	48121	19318	106010	16795	226800	88281	186340	376950	388960	348780	257090	276160	85516	401460	358840	367580	411790	367600	68550	359700	17727	46471	53206	27414	147760	335150	371700	376160	305710	321250	251390	sp|P27061|PPA1_SOLLC **** Acid phosphatase 1 IPR005519 (Acid phosphatase (Class B)), IPR023214 (HAD-like domain) GO:0003993 (acid phosphatase activity)
4	Niben101Scf03255g00018.1	17370	4623.2	4703.3	18565	9137.2	6064.6	35663	27027	29088	33485	35458	25421	4768.8	19638	17671	32936	39562	22452	30029	38004	25844	39029	37225	30662	28454	34342	29129	46313	46423	52890	49927	48350	43010	44770	77977	70900	75795	11445	72818	43740	44543	39190	54625	55409	74699	AT5G47730.1 ***- Sec14p-like phosphatidylinositol transfer family protein LENGTH=341 IPR001251 (CRAL-TRIO domain), IPR011074 (CRAL/TRIO, N-terminal domain)
4	Niben101Scf23557g00013.1	25236	1838.1	309.17	8167.2	640.78	2897.3	2165	5601.9	7867.6	722.19	5073	1281.2	1468.4	12266	4474.8	912.66	758.46	1274.9	31464	32064	32644	20842	27261	22548	30565	27593	28064	23667	22020	22372	21799	22720	22772	31734	2653.5	29980	4317.9	32250	19909	57660	63407	67599	10754	9289.6	13181	sp|Q9LYK9|RS263_ARATH ***- 40S ribosomal protein S26-3 IPR000892 (Ribosomal protein S26e) GO:0003735 (structural constituent of ribosome), GO:0005622 (intracellular), GO:0005840 (ribosome), GO:0006412 (translation)
4	Niben101Scf23954g00005.1	19166	23113	11152	14611	2539.1	8169	22713	9224.5	8715.4	3572.7	60877	1116.2	5997.6	1958.4	15963	59234	1793.1	12307	40541	55494	27665	30721	33116	29045	22552	23945	27289	100890	18911	49820	76645	44578	42057	36255	1980.9	16492	9116.5	21154	1259.3	44245	25250	46234	52557	56312	29467	AT3G53710.1 *-*- ARF-GAP domain 6 LENGTH=459
4	Niben101Scf00570g03015.1	14671	12405	12066	18474	24120	28835	11948	12672	31569	15167	17256	18896	28099	2528.6	6540.4	17092	14071	13029	11731	47701	32655	29653	31824	30515	47505	35075	43493	21358	19134	11859	40898	22321	12311	23954	15936	34581	18933	35373	33573	32822	59978	17023	56965	34349	44132	ref|WP_015114810.1| *-*- S-layer protein [N [Nostoc sp. PCC 7107] IPR001119 (S-layer homology domain)
4	Niben101Scf15920g00003.1	25367	26920	43370	14330	13398	43111	11460	16707	82335	22084	32698	47953	63662	16512	16359	24880	16562	31608	13059	40215	44143	56471	55695	53190	58816	48127	53937	44906	43432	41331	64591	59354	61956	46811	84105	80733	65320	42850	53036	68354	65904	71160	36590	29141	52455	sp|Q83M39|AES_SHIFL --*- Acetyl esterase IPR029058 (Alpha/Beta hydrolase fold) GO:0008152 (metabolic process), GO:0016787 (hydrolase activity)
4	Niben101Scf08376g00012.1	11567	3209	6498.6	12692	8666.9	3626.1	4278.7	4090	1802	8462.9	7137.8	8251.1	5104.3	4809.8	4482.6	2965	9953	10316	12612	13373	12397	14071	15608	14241	14317	12400	14145	11650	10989	12828	10909	12056	11753	13833	19682	15304	10745	7085	37361	7427.8	5029	9319.5	11849	12338	31693	AT1G75170.1 ***- Sec14p-like phosphatidylinositol transfer family protein LENGTH=296 IPR001251 (CRAL-TRIO domain), IPR011074 (CRAL/TRIO, N-terminal domain)
4	Niben101Scf03953g06016.1	15253	1017.8	535.32	14714	8229.2	13405	1302.7	10309	14506	18252	403.11	1598.1	864.56	1488.5	1554.4	1500.2	14688	15962	55436	16341	55153	28642	27658	23058	54054	2678.5	63975	48725	48885	49788	44469	39754	29202	48446	7414.9	37581	7750.8	40064	553.53	46342	55197	52907	52866	49005	32957	sp|Q9XEE9|ALG11_ARATH ***- GDP-Man:Man(3)GlcNAc(2)-PP-Dol alpha-1,2-mannosyltransferase IPR001296 (Glycosyl transferase, family 1) GO:0009058 (biosynthetic process)
5	Niben101Scf02637g02013.1	1117300	1079200	1064600	1445500	1321600	1291300	1048700	1334700	1328600	948120	902590	825880	945200	938360	946820	568390	563370	557990	984430	982910	987960	826070	875570	814840	861310	842670	865340	709150	809920	773160	993490	967990	1000900	982200	1406200	1211800	1351000	1109800	1182300	1020600	945550	941250	1125900	888360	945230	sp|A6UWV8|RS5_META3 **** 30S ribosomal protein S5 IPR000851 (Ribosomal protein S5), IPR014720 (Double-stranded RNA-binding domain) GO:0003723 (RNA binding), GO:0003735 (structural constituent of ribosome), GO:0005840 (ribosome), GO:0006412 (translation), GO:0015935 (small ribosomal subunit)
5	Niben101Scf06562g00009.1	664590	702820	658240	621320	673760	654880	749650	824940	831900	664150	553270	577790	575020	556530	604030	539480	578070	541270	442630	458180	460500	439790	510510	459630	445100	471250	478670	555940	549710	551300	604740	599250	590690	612320	734180	649070	763030	614720	651520	644600	620790	638310	537860	522640	572670	sp|O84066|6PGD_CHLTR --** 6-phosphogluconate dehydrogenase, decarboxylating IPR008927 (6-phosphogluconate dehydrogenase, C-terminal-like), IPR016040 (NAD(P)-binding domain) GO:0004616 (phosphogluconate dehydrogenase (decarboxylating) activity), GO:0006098 (pentose-phosphate shunt), GO:0016491 (oxidoreductase activity), GO:0016616 (oxidoreductase activity, acting on the CH-OH group of donors, NAD …
5	Niben101Scf12932g00018.1	454180	540500	444690	404510	608750	470610	769040	683230	649750	368040	466820	359450	332600	430390	438860	349110	391740	432770	304610	310980	277900	338540	418710	303180	305900	312930	334050	450720	439120	460070	447730	463520	400910	421780	430980	584930	633280	743740	771010	638770	554830	690530	509990	480640	617800	sp|Q9MB46|VATE_CITUN **** V-type proton ATPase subunit E IPR002842 (ATPase, V1/A1 complex, subunit E) GO:0015991 (ATP hydrolysis coupled proton transport), GO:0033178 (proton-transporting two-sector ATPase complex, catalytic domain), GO:0046961 (proton-transporting ATPase activity, rotational mechanism)
5	Niben101Scf23814g00038.1	3339100	3300300	3148700	3017100	3001200	3003900	3213400	3309100	3371700	2194100	2211300	2212600	1822100	1891600	1647100	1139600	1199400	1271400	2591400	2472000	2473800	2240400	2293700	2189200	2627700	2680800	2585100	2434000	2378700	2362800	2765400	2703900	2684700	2635100	2719200	2803200	3315700	3417700	3403600	2690300	2728600	2835900	2154900	2233800	2217600	sp|P59259|H4_ARATH *-*- Histone H4 IPR001951 (Histone H4), IPR009072 (Histone-fold) GO:0000786 (nucleosome), GO:0003677 (DNA binding), GO:0005634 (nucleus), GO:0006334 (nucleosome assembly), GO:0006352 (DNA-templated transcription, initiation), GO:0046982 (protein heterodimerization activity)
5	Niben101Scf08134g01005.1	400050	379230	290440	281370	279200	352140	240880	343030	260710	207310	170870	222120	250230	150310	126560	184070	188060	156590	128180	121530	126520	99028	115440	155560	73990	138400	79251	112460	155720	129040	108010	148320	127010	124700	273700	225430	449350	486910	508330	383210	395640	437200	446700	517600	494380	sp|Q2KNL5|CADH1_OCIBA ***- Cinnamyl alcohol dehydrogenase 1 IPR002085 (Alcohol dehydrogenase superfamily, zinc-type), IPR016040 (NAD(P)-binding domain), IPR020843 (Polyketide synthase, enoylreductase domain) GO:0008270 (zinc ion binding), GO:0016491 (oxidoreductase activity), GO:0055114 (oxidation-reduction process)
5	Niben101Scf01068g05007.1	993580	663920	697010	1067600	1047900	1115000	1176500	1233700	1239700	742290	668330	644820	824130	757680	765400	721680	597300	656080	582200	606330	576580	720860	716110	687960	561450	576400	523080	804900	788190	794680	859870	886250	865730	866200	1291600	1236300	1515900	1438100	1540300	859320	863110	1248400	1109800	1147400	1311300	sp|Q9PTW9|PSA7_CARAU **** Proteasome subunit alpha type-7 IPR000426 (Proteasome alpha-subunit, N-terminal domain), IPR001353 (Proteasome, subunit alpha/beta), IPR029055 (Nucleophile aminohydrolases, N-terminal) GO:0004175 (endopeptidase activity), GO:0004298 (threonine-type endopeptidase activity), GO:0005839 (proteasome core complex), GO:0006511 (ubiquitin-dependent protein catabolic process), G…
5	Niben101Scf03154g04006.1	1476100	1501300	1461800	1456400	1590200	1499400	1694000	1767600	1760400	1304500	1241700	1361000	1089900	1111700	1147700	1073800	985180	1115400	1111700	912500	954170	858870	848660	805440	1031100	1019500	982280	1100100	1164600	1049300	1197600	1179200	1121600	1218600	1406700	1414600	1413000	1259900	1263200	1303000	1277000	1291900	1148800	1139600	1227500	AT5G12470.1 ***- Protein of unknown function (DUF3411) LENGTH=386 IPR021825 (Protein of unknown function DUF3411, plant)
5	Niben101Scf06716g01001.1	242420	249280	228650	281530	213520	160130	273540	296090	286050	183360	163660	140380	132060	114960	115530	121260	153450	166150	166460	134040	111000	145680	156170	121730	135230	145210	97085	143360	187450	178700	137110	139990	139250	106650	200490	213280	253740	230680	234730	173840	171220	200170	188350	194180	205820	sp|Q9SG80|ASD1_ARATH **** Alpha-L-arabinofuranosidase 1 IPR008979 (Galactose-binding domain-like), IPR010720 (Alpha-L-arabinofuranosidase, C-terminal), IPR017853 (Glycoside hydrolase superfamily) GO:0046373 (L-arabinose metabolic process), GO:0046556 (alpha-L-arabinofuranosidase activity)
5	Niben101Scf08137g03005.1	189010	184230	182990	180410	213130	190100	128390	192720	228500	197240	131640	132660	152720	84420	159410	175400	96300	148630	139520	127130	121650	111010	89731	162810	120890	118350	135070	130420	130240	139890	89453	148130	131680	95871	170170	148620	189980	138960	162810	157150	162960	170980	162100	156440	143700	sp|Q0K1H0|1A1D_CUPNH ***- 1-aminocyclopropane-1-carboxylate deaminase IPR001926 (Tryptophan synthase beta subunit-like PLP-dependent enzyme)
5	Niben101Scf06819g02006.1	241150	236280	252400	362320	348330	318580	422840	394820	360390	270020	223790	161650	155310	183170	158260	172510	184850	147950	210820	204940	211950	225070	240630	231900	235620	215080	222470	281000	266210	257720	331250	321070	322700	254550	388220	419970	402890	475410	468500	260430	288790	315190	296970	283330	422920	sp|Q8LC83|RS242_ARATH ***- 40S ribosomal protein S24-2 IPR001976 (Ribosomal protein S24e), IPR012677 (Nucleotide-binding alpha-beta plait domain) GO:0000166 (nucleotide binding), GO:0003735 (structural constituent of ribosome), GO:0005622 (intracellular), GO:0005840 (ribosome), GO:0006412 (translation)
5	Niben101Scf02122g01007.1	29680	30171	32549	34788	31877	32096	41120	39905	38746	22194	24313	22947	36357	30474	32509	22496	25476	26894	22204	20351	28217	15593	25978	20913	21289	28389	11487	8788.2	17610	16572	15302	19033	22298	6216.2	28712	32835	35854	25937	27382	26823	28055	34215	19605	21542	36533	sp|B4S437|GCST_PROA2 ***- Aminomethyltransferase IPR006222 (Glycine cleavage T-protein-like, N-terminal), IPR017703 (YgfZ/GcvT conserved site), IPR027266 (GTP-binding protein TrmE/Glycine cleavage system T protein, domain 1), IPR029043 (Glycine cleavage T-protein/YgfZ, C-terminal domain) GO:0005515 (protein binding)
5	Niben101Scf01451g06002.1	376680	369430	385690	310220	322920	324410	363920	296780	342160	232150	258710	192600	238930	278870	303700	266090	240570	257890	129500	168630	135920	140040	166750	175260	82174	133090	115980	160020	173730	125770	170920	189720	180500	127870	317020	171510	399760	343080	401610	301410	308570	356550	327080	345200	393120	sp|Q4L385|IMDH_STAHJ *-*- Inosine-5'-monophosphate dehydrogenase IPR000644 (CBS domain)
5	Niben101Scf07339g02015.1	260780	272270	249530	210930	212210	216890	229490	211210	213910	92697	71894	120280	108610	95387	102910	101080	108220	98611	68762	39411	78981	61515	83733	87100	61348	68148	57137	112170	115970	86600	46389	123980	120040	77216	139950	69094	210240	201140	182400	199260	182580	132250	123080	143540	173240	sp|A5UE38|GLPE_HAEIE -**- Thiosulfate sulfurtransferase GlpE IPR001763 (Rhodanese-like domain)
5	Niben101Scf02606g04004.1	136720	114410	95396	73719	66878	91204	85791	98260	105160	70738	62609	78407	92340	77486	76334	61788	51779	72831	64063	61014	68159	60095	62464	73835	65260	61121	56329	74667	77853	83475	96819	93794	93121	87593	92290	100760	125660	108540	113120	96956	92771	84209	106910	118790	124480	sp|Q9XI05|PSB3A_ARATH **** Proteasome subunit beta type-3-A IPR001353 (Proteasome, subunit alpha/beta), IPR029055 (Nucleophile aminohydrolases, N-terminal) GO:0004175 (endopeptidase activity), GO:0004298 (threonine-type endopeptidase activity), GO:0005839 (proteasome core complex), GO:0051603 (proteolysis involved in cellular protein catabolic process)
5	Niben101Scf09564g00010.1	1214000	1242600	1183500	1329100	1332400	1314800	1672100	1716500	1765400	819810	833170	787230	940960	953740	1002000	593610	534320	602060	850750	874920	866710	740270	825000	733830	724900	703740	709280	996370	865580	854950	1492900	1555300	1512100	1224600	1531700	1472800	1634900	1476900	1542000	1175400	1222200	1230900	1398700	1358100	1452400	sp|O65743|RL24_CICAR ***- 60S ribosomal protein L24 IPR000988 (Ribosomal protein L24e-related), IPR023441 (Ribosomal protein L24e domain), IPR023442 (Ribosomal protein L24e, conserved site)
5	Niben101Scf02216g01017.1	92482	93991	84703	77990	80832	85216	64919	69131	77430	26651	32581	37318	37486	62770	35025	23463	22228	36753	26945	49303	69604	38027	17194	28373	30296	65913	27808	23705	34780	32458	21665	38050	29315	31240	61817	28475	63700	45625	83317	41783	17520	30740	52626	108760	58063	AT4G08850.1 *-*- Leucine-rich repeat receptor-like protein kinase family protein LENGTH=1045 IPR001611 (Leucine-rich repeat), IPR003591 (Leucine-rich repeat, typical subtype), IPR013210 (Leucine-rich repeat-containing N-terminal, type 2) GO:0005515 (protein binding)
5	Niben101Scf14542g00033.1	88508	89538	71725	135160	98931	72691	106460	58350	134540	75932	44620	66872	41196	51940	45649	41162	62517	96671	43459	65252	67679	65744	62094	73558	71266	64114	95021	99248	79274	72147	129820	125100	100410	99152	118140	87380	79235	80834	77588	45978	93887	125790	134910	73806	41562	sp|Q9FJR0|RENT1_ARATH **** Regulator of nonsense transcripts 1 homolog IPR014001 (Helicase superfamily 1/2, ATP-binding domain), IPR018999 (RNA helicase UPF1, UPF2-interacting domain), IPR027417 (P-loop containing nucleoside triphosphate hydrolase) GO:0000184 (nuclear-transcribed mRNA catabolic process, nonsense-mediated decay), GO:0003677 (DNA binding), GO:0004386 (helicase activity), GO:0005524…
5	Niben101Scf05029g00003.1	402590	422100	432230	477940	489980	443680	438670	485770	463090	350570	338590	353140	358810	307250	381910	339060	344900	443360	205810	221270	209500	347350	294660	306070	195560	212420	243610	286060	272710	238060	280740	261560	293960	287270	425040	390560	415350	357780	349750	331740	314230	353350	358970	372590	382440	sp|Q21MC3|PUR5_SACD2 **** Phosphoribosylformylglycinamidine cyclo-ligase IPR004733 (Phosphoribosylformylglycinamidine cyclo-ligase), IPR016188 (PurM, N-terminal-like) GO:0003824 (catalytic activity), GO:0004641 (phosphoribosylformylglycinamidine cyclo-ligase activity), GO:0005737 (cytoplasm), GO:0006189 ('de novo' IMP biosynthetic process)
5	Niben101Scf10007g00002.1	39878	39308	40268	34406	30801	31417	28607	27936	29706	22137	23344	25156	21431	20422	12657	20464	21829	25004	28373	28128	23923	17815	23783	18484	31974	29257	27435	25406	26852	24144	34118	30972	31436	30964	25084	41641	38994	42615	45880	36184	15745	36076	40951	36461	40853	AT4G39520.1 **** GTP-binding protein-related LENGTH=369 IPR005225 (Small GTP-binding protein domain), IPR012675 (Beta-grasp domain), IPR027417 (P-loop containing nucleoside triphosphate hydrolase) GO:0005525 (GTP binding)
5	Niben101Scf01689g06005.1	909050	956530	910150	1134700	1148000	1206300	1493100	1538900	1545700	454390	458070	458700	481770	499230	507190	288270	327110	324040	808680	804150	854240	876780	883540	933430	838170	850930	829680	881590	900430	921130	1069500	1118600	1081400	777790	1050800	885590	1411600	1144900	1212900	838030	840270	911690	1014500	997310	1090900	sp|P49689|RS30_ARATH ***- 40S ribosomal protein S30 IPR006846 (Ribosomal protein S30) GO:0003735 (structural constituent of ribosome), GO:0005622 (intracellular), GO:0005840 (ribosome), GO:0006412 (translation)
5	Niben101Scf03905g01008.1	5093.6	11414	9434.5	19652	11155	10129	9139.9	30098	17541	6988.3	9713.7	4561	2813.8	1947.2	9391	2792.8	3421.8	4969.8	11121	1144.3	1920	5035.3	7091.3	3018.1	4242.8	9903.5	4823.9	2379.2	4331.3	4206.4	8340.7	4382.5	10696	7926.6	6699.6	10642	18181	11302	16007	9544.4	6685.2	6399	4784.6	6803.6	13832	sp|P29130|PHYB_TOBAC ***- Phytochrome B IPR001294 (Phytochrome), IPR005467 (Signal transduction histidine kinase, core), IPR029016 (GAF domain-like) GO:0000155 (phosphorelay sensor kinase activity), GO:0004871 (signal transducer activity), GO:0005515 (protein binding), GO:0006355 (regulation of transcription, DNA-templated), GO:0007165 (signal transduction), GO:0009584 (detection of visible light…
5	Niben101Scf05824g13010.1	542450	476960	390360	503860	498240	486560	571930	536440	516940	512150	367930	391690	337710	375730	369310	329640	376270	339730	368410	378660	346770	295430	298310	276340	296650	290260	351370	388190	406490	348550	294470	393620	392060	428270	541240	492310	492960	383670	403710	385580	394710	396350	434890	442440	370180	AT1G80560.1 **** isopropylmalate dehydrogenase 2 LENGTH=405 IPR001804 (Isocitrate and isopropylmalate dehydrogenases family), IPR024084 (Isopropylmalate dehydrogenase-like domain) GO:0000287 (magnesium ion binding), GO:0003862 (3-isopropylmalate dehydrogenase activity), GO:0005737 (cytoplasm), GO:0009098 (leucine biosynthetic process), GO:0016616 (oxidoreductase activity, acting on the CH-OH grou…
5	Niben101Scf07462g00005.1	14368	36064	36992	11871	33530	32717	38483	40176	42524	16620	22301	32038	10491	4731.4	11011	16691	29329	14508	8344.8	26447	3797.3	15292	14725	8782.9	36326	27821	9572	13553	14177	26662	23939	15690	25772	7446.6	40391	17504	20430	14866	16289	19202	18432	43074	35392	28028	19421	sp|Q5DTZ6|RN150_MOUSE *-*- RING finger protein 150 IPR013083 (Zinc finger, RING/FYVE/PHD-type) GO:0005515 (protein binding), GO:0008270 (zinc ion binding)
5	Niben101Scf03645g04018.1	26943	27852	42268	33428	32844	31930	27519	31438	13876	21817	10801	18128	23322	21789	23549	18788	15900	7693.6	19574	21771	22421	11246	15354	12907	22275	26629	8564	14862	18403	15051	19941	18898	17245	20714	21716	18574	24704	22429	27960	28089	28730	27897	26062	16642	23060	AT1G15390.1 **** peptide deformylase 1A LENGTH=269 IPR000181 (Formylmethionine deformylase), IPR023635 (Peptide deformylase) GO:0005506 (iron ion binding), GO:0042586 (peptide deformylase activity)
5	Niben101Scf36191g00005.1	674100	725660	677210	666240	651580	605290	627150	672890	683970	305310	274660	254490	405580	404830	421030	169200	190770	168670	358550	362150	366580	384010	401560	370960	436630	416560	430640	416920	409690	419690	646470	632880	638110	504970	564820	640840	527520	524350	574690	408280	455330	431260	432000	417010	481920	sp|A2BN38|RS12_HYPBU **** 30S ribosomal protein S12 IPR006032 (Ribosomal protein S12/S23) GO:0003735 (structural constituent of ribosome), GO:0005622 (intracellular), GO:0005840 (ribosome), GO:0006412 (translation), GO:0015935 (small ribosomal subunit)
5	Niben101Scf03277g02012.1	241250	347950	237060	241590	203700	219250	246270	222190	277690	95440	127770	143440	123610	74603	110360	82565	50527	71354	128060	131370	147590	206860	203140	213820	195160	185030	226420	164720	208730	206570	232400	237280	270700	182460	218930	320000	291840	326730	321990	196520	212580	196680	225700	221860	246780	sp|P35065|H2A1_TETTS ***- Histone H2A.1 IPR009072 (Histone-fold) GO:0000786 (nucleosome), GO:0003677 (DNA binding), GO:0005634 (nucleus), GO:0046982 (protein heterodimerization activity)
5	Niben101Scf05697g02016.1	641110	645530	647920	757040	732560	699870	1089500	1074700	1070200	261650	258340	250160	303390	313730	327770	217580	213570	186210	824180	839860	801450	804860	810170	798160	691140	709870	717830	648240	650190	678270	554010	532180	509040	674110	677380	675140	726340	745210	770050	601980	589240	568900	747130	736610	774620	sp|Q8DMM5|RL16_THEEB ***- 50S ribosomal protein L16 IPR000114 (Ribosomal protein L16), IPR016180 (Ribosomal protein L10e/L16) GO:0003735 (structural constituent of ribosome), GO:0005840 (ribosome), GO:0006412 (translation), GO:0019843 (rRNA binding)
5	Niben101Scf05676g06016.1	1072000	1142200	1073400	967470	1013700	973820	880040	997630	937240	475390	455880	388640	321570	287260	320940	257650	275880	222920	621720	679080	624700	633990	708800	687160	593650	593270	571020	589440	629040	626900	708540	745370	779470	163000	863180	844650	993790	933800	994750	634950	652460	611090	757310	753920	903370	sp|P02274|H2A1_TETPY ***- Histone H2A.1 IPR009072 (Histone-fold) GO:0000786 (nucleosome), GO:0003677 (DNA binding), GO:0005634 (nucleus), GO:0046982 (protein heterodimerization activity)
5	Niben101Scf04518g00014.1	27910	35609	32933	38017	35317	31289	42169	41512	37489	24562	28470	28849	20783	19070	22160	14641	21474	18703	22875	20371	23575	24152	26324	19483	14917	18519	24809	23905	27976	19605	30479	39833	33911	27540	31279	25617	21832	29654	17970	22873	29915	26674	36562	39900	35215	sp|Q9STF0|LRKS3_ARATH **** Receptor like protein kinase S.3 IPR011009 (Protein kinase-like domain), IPR011990 (Tetratricopeptide-like helical domain) GO:0004672 (protein kinase activity), GO:0005515 (protein binding), GO:0005524 (ATP binding), GO:0006468 (protein phosphorylation), GO:0016772 (transferase activity, transferring phosphorus-containing groups)
5	Niben101Scf00571g10002.1	140370	164790	135750	141040	172450	165210	169590	163910	178360	122680	113150	87019	6243.8	91721	120500	116960	125150	89467	99052	97896	103460	69051	70288	64450	57940	86580	84622	64048	67473	66803	110940	91249	68533	117210	141600	90614	151870	88202	140250	135590	135440	96580	85820	140800	96216	AT5G19760.1 ***- Mitochondrial substrate carrier family protein LENGTH=298 IPR002067 (Mitochondrial carrier protein), IPR023395 (Mitochondrial carrier domain) GO:0055085 (transmembrane transport)
5	Niben101Scf05373g02004.1	892610	873670	778730	814800	842120	843680	944790	1029900	998590	568030	544350	533510	503480	498720	546100	300500	298790	314350	579560	592180	573160	469680	441070	468670	576400	601170	587790	553760	542330	533260	658170	664740	675130	638270	662380	730510	918500	912350	954930	742440	735700	756510	655970	663510	667050	sp|Q9U7D0|H4_MASBA *-*- Histone H4 IPR001951 (Histone H4), IPR009072 (Histone-fold) GO:0000786 (nucleosome), GO:0003677 (DNA binding), GO:0005634 (nucleus), GO:0006334 (nucleosome assembly), GO:0006352 (DNA-templated transcription, initiation), GO:0046982 (protein heterodimerization activity)
5	Niben101Scf03819g03015.1	35812	45427	43014	44046	36967	49063	52756	48944	55174	32375	36407	33462	44346	36092	34898	26974	35337	36671	33474	33919	26286	26638	23140	28571	32063	31819	29962	37384	26747	34096	44035	42677	37656	37516	45119	46457	51964	36681	42617	42757	42134	55481	45562	45855	60003	sp|Q54KZ8|EIF3M_DICDI **** Eukaryotic translation initiation factor 3 subunit M IPR000717 (Proteasome component (PCI) domain), IPR027528 (Eukaryotic translation initiation factor 3 subunit M) GO:0003743 (translation initiation factor activity), GO:0005515 (protein binding), GO:0005737 (cytoplasm), GO:0005852 (eukaryotic translation initiation factor 3 complex)
5	Niben101Scf00149g06013.1	295480	172750	204710	226910	231550	272040	267910	274660	243230	215760	202040	186180	77220	74126	124150	183260	183440	194740	197070	203520	195240	189260	212620	195270	187350	198480	193570	213780	202380	184880	249370	263570	247000	228840	255470	283860	242950	237850	260540	142590	178010	217900	212870	182070	228050	ref|WP_008196576.1| **** chitin-binding protein [Microcystis sp. T1-4] emb|CCI30484.1| Chlorophyll a synthase [Microcystis sp. T1-4] IPR000537 (UbiA prenyltransferase family) GO:0004659 (prenyltransferase activity), GO:0015995 (chlorophyll biosynthetic process), GO:0016021 (integral component of membrane), GO:0046408 (chlorophyll synthetase activity)
5	Niben101Scf10026g01008.1	146610	93977	164330	152480	167760	154160	196110	125700	189690	124910	115970	77187	121200	115750	132370	124360	104930	149410	85850	94539	93136	56377	92935	95833	72104	82581	81810	95001	91517	73001	111910	102100	99544	102120	177350	164390	158910	162570	160150	148070	144540	136490	152990	135030	138070	AT5G57440.1 **** Haloacid dehalogenase-like hydrolase (HAD) superfamily protein LENGTH=240 IPR006439 (HAD hydrolase, subfamily IA), IPR023214 (HAD-like domain) GO:0008152 (metabolic process), GO:0016787 (hydrolase activity)
5	Niben101Scf06890g00001.1	33283	34568	19587	23226	33103	31620	14113	39342	36441	13187	3126.5	3758.5	7360.1	16030	14032	1589.6	24101	17674	14146	10939	4847.1	15023	6126.9	11591	8341.6	3843.5	6449.8	7804.6	12992	18997	5482.5	7316.2	4483.1	6126.3	16066	14588	15927	11662	14206	12616	19222	17204	23297	22559	24263	sp|O65351|SUBL_ARATH *-*- Subtilisin-like protease IPR015500 (Peptidase S8, subtilisin-related), IPR023828 (Peptidase S8, subtilisin, Ser-active site) GO:0004252 (serine-type endopeptidase activity), GO:0006508 (proteolysis)
5	Niben101Ctg13092g00001.1	58513	60573	61865	73389	89180	72456	49399	51050	44298	47993	49812	43159	37171	19067	44740	38686	46482	42724	24868	25690	2775.8	11945	55331	8512.4	9111.3	7364.3	5361	54180	5282.7	66523	53124	54252	65894	8890.2	14989	45179	47526	39784	40488	50649	53471	54143	40741	46565	47377	emb|CAC83580.1| --*- major latex-like protein [Arabidopsis thaliana] IPR000916 (Bet v I domain), IPR023393 (START-like domain) GO:0006952 (defense response), GO:0009607 (response to biotic stimulus)
5	Niben101Scf07564g01019.1	56593	47969	45295	43893	42551	40626	53574	51180	42399	42472	28685	35579	23499	26352	29555	31173	32294	39927	28748	27657	29747	29753	27479	27900	39253	29964	32913	30906	40375	26999	30864	25736	29491	30639	10139	38734	52758	48614	51876	47783	40931	44249	46233	53571	45688	sp|B0K4Z5|HTPX_THEPX *-*- Protease HtpX homolog IPR001915 (Peptidase M48) GO:0004222 (metalloendopeptidase activity), GO:0006508 (proteolysis), GO:0016020 (membrane)
5	Niben101Scf00031g00003.1	189830	199490	198310	236190	246450	249920	220470	199630	189290	151410	134240	146590	110940	145970	141410	144970	159840	148540	135410	127970	92413	6571.2	1550.5	5882.4	130730	11072	7183.1	131850	6075.8	9229.5	11463	134230	94362	5586.8	199430	189980	185370	152180	147680	181240	186510	192260	190720	184230	218080	AT3G14940.1 **** phosphoenolpyruvate carboxylase 3 LENGTH=968 IPR021135 (Phosphoenolpyruvate carboxylase) GO:0003824 (catalytic activity), GO:0006099 (tricarboxylic acid cycle), GO:0008964 (phosphoenolpyruvate carboxylase activity), GO:0015977 (carbon fixation)
5	Niben101Scf00991g05009.1	642130	662600	660730	752960	753180	731760	805410	818550	816130	477910	456300	440590	310030	323260	331600	317070	342890	335130	540440	526680	534810	596840	613710	591640	531410	522180	516170	587220	574860	577890	710650	710560	688510	604870	758650	639920	712680	573580	606110	515970	519800	505400	593080	591500	623420	sp|P51414|RL261_ARATH **** 60S ribosomal protein L26-1 IPR005756 (Ribosomal protein L26/L24P, eukaryotic/archaeal), IPR008991 (Translation protein SH3-like domain) GO:0003735 (structural constituent of ribosome), GO:0005622 (intracellular), GO:0005840 (ribosome), GO:0006412 (translation), GO:0015934 (large ribosomal subunit)
5	Niben101Scf03065g00008.1	47099	37236	33751	42359	39002	41490	53897	53074	49105	21595	21507	22058	14585	22946	22045	23977	20457	19069	31719	35197	8511.6	5523.3	8118.8	50269	8946.8	57503	5519.7	20610	10077	26582	28503	38681	80224	80653	41924	50164	46693	53564	46998	26256	9506.2	34178	28958	28201	31390	sp|P60039|RL73_ARATH ***- 60S ribosomal protein L7-3 IPR005998 (Ribosomal protein L7, eukaryotic)
5	Niben101Scf04887g01001.1	28800	44770	42110	31888	34701	34437	31181	26373	41785	10790	22628	5448.8	12787	21018	30882	7518.8	9351.6	30491	19229	6236.6	17614	14392	16791	12253	9542	14848	6954.5	27644	37407	49250	49246	21871	22565	17485	15300	60183	32510	56554	69341	23673	28687	8105.4	6219.3	7479.5	13639	AT5G07990.1 ***- Cytochrome P450 superfamily protein LENGTH=513 IPR001128 (Cytochrome P450) GO:0005506 (iron ion binding), GO:0016705 (oxidoreductase activity, acting on paired donors, with incorporation or reduction of molecular oxygen), GO:0020037 (heme binding), GO:0055114 (oxidation-reduction process)
5	Niben101Scf08873g01015.1	153280	129260	117210	151770	154810	183190	222880	231060	231700	96054	99924	99035	133920	117410	129410	126140	121050	114810	121450	131840	124460	165960	160310	160310	116830	122380	133500	142680	144870	145990	165110	180560	176540	172340	195160	185990	187690	307900	192550	148150	166710	121490	153790	106200	173070	sp|P49637|R27A3_ARATH ***- 60S ribosomal protein L27a-3 IPR021131 (Ribosomal protein L18e/L15P) GO:0003735 (structural constituent of ribosome), GO:0005622 (intracellular), GO:0005840 (ribosome), GO:0006412 (translation)
5	Niben101Scf05962g04009.1	102230	159380	123960	70074	79765	67322	94909	119960	116920	36335	58215	41745	72685	32761	56882	16873	19234	40979	41253	37202	14984	46809	46686	53521	33353	54494	55165	24933	56797	53123	43933	51486	58490	49821	54031	119910	95706	121550	92927	57859	45865	51532	53654	50767	42620	sp|A3LZZ0|H2A1_PICST ***- Histone H2A.1 IPR009072 (Histone-fold) GO:0000786 (nucleosome), GO:0003677 (DNA binding), GO:0005634 (nucleus), GO:0046982 (protein heterodimerization activity)
5	Niben101Scf04570g06006.1	283240	306240	303920	346040	344480	342830	317640	360430	398380	216810	233620	207400	157960	167080	180280	155850	155080	108610	250770	297210	272410	25666	219970	270790	246890	296950	353850	218100	246680	251130	315280	334110	353380	270900	397470	401520	399060	366770	403470	270980	265720	289260	301030	313350	363300	sp|Q8WSF1|H33_TRIPS ***- Histone H3.3 IPR000164 (Histone H3/CENP-A), IPR009072 (Histone-fold) GO:0000786 (nucleosome), GO:0003677 (DNA binding), GO:0046982 (protein heterodimerization activity)
5	Niben101Scf05483g08004.1	58274	82186	84085	49963	81136	42499	88093	27274	76001	24985	40467	24115	25062	35400	13400	30945	52310	34311	22943	18947	24159	47286	55860	53357	38888	29751	24620	42735	32891	38723	39385	45558	43743	64980	51714	42654	38686	53626	53303	20431	37543	46726	43656	57568	72393	sp|Q9SSK5|MLP43_ARATH ***- MLP-like protein 43 IPR000916 (Bet v I domain), IPR023393 (START-like domain) GO:0006952 (defense response), GO:0009607 (response to biotic stimulus)
5	Niben101Scf00160g10028.1	14259	15962	18381	10736	8609.5	13359	22818	24023	7794.4	3742.8	3608.1	13840	4621.9	6757.6	2908.3	5254.5	10576	9728.9	8003	4736.9	4327.8	6409.3	7922.9	8945	11399	8166.4	10818	9898.3	12132	9717.4	8310	9368.5	11316	6605	10146	8181.9	12034	10051	19768	11394	4016.6	9652.9	14276	13034	11297	sp|Q54XK2|SC61A_DICDI **** Protein transport protein Sec61 subunit alpha IPR002208 (SecY/SEC61-alpha family), IPR023201 (SecY subunit domain) GO:0015031 (protein transport), GO:0016020 (membrane)
5	Niben101Scf01936g06010.1	8715.9	8201.1	10543	13860	6728	19835	7144.6	16669	10806	8008.4	3333.8	2523.2	2455.1	4677.5	11070	6288.2	7079.6	7027.3	10254	4670	3173.5	6181.6	9002.6	8694.5	9045.9	4048.5	4689.5	6445.5	6994.7	3416.7	6596.9	3068.8	14761	9757.7	6939.4	7201.1	10799	14694	14050	9161.3	10639	8501.4	12576	7941.2	6212.2	AT4G39860.1 ***- unknown protein; BEST Arabidopsis thaliana protein match is: unknown protein . LENGTH=299 IPR025131 (Domain of unknown function DUF4057)
5	Niben101Scf23843g00010.1	40790	36866	33201	34941	36633	33662	47904	52286	51994	28334	33509	32693	25672	27326	31862	29731	32539	31702	28227	29235	30503	27406	27791	20728	21248	22047	22451	19064	23898	22832	21234	22837	23372	28960	54746	37920	86344	57589	56669	39224	34531	42636	44262	51109	54753	AT2G27730.1 ***- copper ion binding LENGTH=113
5	Niben101Scf09172g00010.1	29852	27588	27916	29300	31968	28835	31419	35133	34692	26416	25486	24086	26186	24312	23051	24382	21414	19836	23297	20044	21836	23519	717.92	20985	1513.2	22754	22635	29537	27013	25641	28366	30899	28435	29878	30909	37489	38205	34995	37115	32612	29189	35120	27853	30496	32521	sp|Q9JZ47|PLSC_NEIMB *-** 1-acyl-sn-glycerol-3-phosphate acyltransferase IPR002123 (Phospholipid/glycerol acyltransferase) GO:0008152 (metabolic process), GO:0016746 (transferase activity, transferring acyl groups)
5	Niben101Scf10579g00018.1	7184.8	31042	32174	27196	46050	26174	21060	7300.9	26403	5336.1	5821.1	22155	5511	6933.6	4795.8	5483.3	25403	3600.4	8294.6	15616	25637	9205.1	7434.3	10585	12550	3658.8	6294.1	10602	13890	8484.3	11705	6390.1	11809	5056.1	31603	8132.9	20614	5778.6	10120	18713	26298	8193.8	15438	46360	11494	ref|WP_025922200.1| ***- MULTISPECIES: thiol-disulfide oxidoreductase [Prochlorococcus] IPR007263 (Protein of unknown function DUF393), IPR012336 (Thioredoxin-like fold)
5	Niben101Scf03413g01002.1	9528.5	37605	28156	31782	36724	36110	5435.2	34985	41131	4986.7	5039	18459	15587	7074.9	24852	12484	13371	7027.3	6294.4	13703	25365	23709	19658	18978	5498.9	4440.7	9217.3	7568.5	14077	15137	21267	14262	13656	21205	30133	7836.7	10391	37434	37504	8032.7	9062.3	19141	27656	22582	31452	gb|KEH18714.1| ***- rRNA processing/ribosome biogenesis protein [Medicago truncatula] IPR016024 (Armadillo-type fold) GO:0005488 (binding)
5	Niben101Scf00414g06008.1	206860	219520	195430	158780	226200	278040	242770	161110	169570	148840	152200	166360	191220	189600	211760	145590	155050	96667	112810	145920	129680	121170	147950	156470	75445	130020	146570	127260	142920	245180	192660	178880	161730	139510	188090	230600	255460	241990	238760	161590	153750	152450	141110	152420	175560	sp|Q1CZI7|HTPG_MYXXD *-*- Chaperone protein HtpG IPR001404 (Heat shock protein Hsp90 family) GO:0005524 (ATP binding), GO:0006457 (protein folding), GO:0006950 (response to stress), GO:0051082 (unfolded protein binding)
5	Niben101Scf12017g00012.1	46767	45662	40306	131450	145080	39233	130410	63619	137450	25934	50584	52570	33476	29118	43605	71080	52664	69079	59715	60587	52530	38340	30853	56495	56708	54366	53868	61790	56617	58671	85163	85605	75602	70194	86609	82729	100970	76994	83306	109380	103790	101890	83145	97723	82465	sp|Q9ATF5|RL18A_CASSA ***- 60S ribosomal protein L18a IPR023573 (Ribosomal protein L18a/LX), IPR028877 (50S ribosomal protein L18Ae/60S ribosomal protein L20 and L18a) GO:0003735 (structural constituent of ribosome), GO:0005840 (ribosome), GO:0006412 (translation)
5	Niben101Scf08179g01015.1	497610	562950	535940	487120	465270	483440	527700	568130	564710	465180	428510	433540	539660	485600	524630	476950	459930	443910	265290	297320	344130	432610	456140	458780	261280	299770	281320	333100	349920	285200	407150	438380	438570	440860	490230	537110	718850	604190	665290	622160	618080	614790	620970	568050	576590	sp|B8HP54|ATPE_CYAP4 *-** ATP synthase epsilon chain IPR001469 (ATPase, F1 complex, delta/epsilon subunit) GO:0015986 (ATP synthesis coupled proton transport), GO:0045261 (proton-transporting ATP synthase complex, catalytic core F(1)), GO:0046933 (proton-transporting ATP synthase activity, rotational mechanism), GO:0046961 (proton-transporting ATPase activity, rotational mechanism)
5	Niben101Scf00862g00016.1	29089	32894	27103	75961	15140	34102	30715	14105	80110	28744	4643.8	10935	17295	8617.8	6845.4	24338	5443.6	14660	5348.7	6039.1	14378	7440	16670	16366	10780	20531	7800.2	7250.1	12005	18372	12582	17697	13517	10135	36368	8851.4	7821.2	37550	41732	35621	7405.2	47239	6342.9	7191.2	13307	sp|Q9ZVD0|SRRT_ARATH ***- Serrate RNA effector molecule IPR007042 (Arsenite-resistance protein 2), IPR021933 (Protein of unknown function DUF3546) GO:0046872 (metal ion binding)
5	Niben101Scf04847g00009.1	159120	225560	147860	257550	241230	261360	143090	196880	217940	225340	191260	200690	92889	104280	51329	123020	132110	127710	139260	127140	163480	163530	135770	171520	130370	71465	145490	137740	142160	138620	146940	109420	127960	116780	80469	153830	209340	167520	144100	208430	229020	154200	210190	250890	216630	sp|Q9FM65|FLA1_ARATH ***- Fasciclin-like arabinogalactan protein 1 IPR000782 (FAS1 domain)
5	Niben101Scf10757g00001.1	154580	54609	22032	86113	34260	197060	128960	195620	122680	54488	93402	37238	53996	31513	46609	18287	47667	37277	150530	45028	79297	38973	48597	45063	37776	52617	41843	59864	52685	196010	55682	120860	49229	52942	43856	38998	140070	61764	71126	140740	73941	198800	83557	82744	122950	sp|Q6ZKC0|14333_ORYSJ ***- 14-3-3-like protein GF14-C IPR000308 (14-3-3 protein), IPR023409 (14-3-3 protein, conserved site), IPR023410 (14-3-3 domain) GO:0019904 (protein domain specific binding)
5	Niben101Scf07466g06001.1	25947	43841	43248	42584	55004	64818	69695	50297	74530	47456	29671	30444	55275	34725	32710	42918	50944	19044	17730	8817.2	10698	24309	62453	15677	21067	15560	17848	31666	46408	49477	61695	44351	28009	52235	32850	16545	15941	42921	79806	78028	77601	28231	76864	25963	38980	gb|EYS80727.1| **** ABC transporter ATP-binding protein [Cupriavidus sp. SK-4] IPR003439 (ABC transporter-like), IPR011527 (ABC transporter type 1, transmembrane domain), IPR027417 (P-loop containing nucleoside triphosphate hydrolase) GO:0005524 (ATP binding), GO:0006810 (transport), GO:0016021 (integral component of membrane), GO:0016887 (ATPase activity), GO:0042626 (ATPase activity, coupled to…
5	Niben101Scf00467g00016.1	65916	9253.7	62456	55080	56130	55043	115390	116360	115490	52854	67162	4673.8	30461	6433	1757.9	58142	63491	57776	2204.3	2433.7	6131.1	4392.5	15154	5186.1	6551.3	17808	2233	11413	5459.6	5319.8	2325.6	11104	3650.2	14529	129070	136840	160510	128090	148370	58998	58120	65319	59996	58848	143140	sp|Q9CR16|PPID_MOUSE **** Peptidyl-prolyl cis-trans isomerase D IPR002130 (Cyclophilin-type peptidyl-prolyl cis-trans isomerase domain), IPR024936 (Cyclophilin-type peptidyl-prolyl cis-trans isomerase), IPR029000 (Cyclophilin-like domain) GO:0000413 (protein peptidyl-prolyl isomerization), GO:0003755 (peptidyl-prolyl cis-trans isomerase activity), GO:0006457 (protein folding)
5	Niben101Scf07382g01007.1	45651	49914	48718	50475	51346	57928	53190	79077	17618	20976	50779	54768	30361	30396	21702	41216	32074	28501	25374	37683	9008.1	32467	28678	22148	32145	41185	35312	34682	29798	28650	36567	28859	26584	24642	33531	27313	45765	48368	40150	39454	44418	40699	35356	34347	39000	sp|Q06881|BCCP_NOSS1 ***- Biotin carboxyl carrier protein of acetyl-CoA carboxylase IPR000089 (Biotin/lipoyl attachment)
5	Niben101Scf09127g00010.1	38583	41936	44595	38804	35002	34814	40862	44928	48107	32864	9278.3	26316	44812	23041	46732	31093	35105	23569	18220	18037	14806	4697.5	23720	26169	16850	17875	23068	25765	25013	47048	34530	25786	23628	27323	37711	34065	39354	34765	19505	26876	34447	46293	32884	19612	37980	sp|Q5B7W2|MANBB_EMENI **** Beta-mannosidase B IPR008979 (Galactose-binding domain-like), IPR013812 (Glycoside hydrolase, family 2/20, immunoglobulin-like beta-sandwich domain), IPR017853 (Glycoside hydrolase superfamily), IPR023232 (Glycoside hydrolase, family 2, active site), IPR028787 (Mannosylglycoprotein endo-beta-mannosidase) GO:0004553 (hydrolase activity, hydrolyzing O-glycosyl compounds),…
5	Niben101Scf03595g19030.1	70625	62807	56542	83364	79197	74102	89558	101440	93204	63997	63782	44891	63756	72516	78678	62562	57544	61914	50138	57840	39431	54261	53930	52941	49462	47633	47782	49313	45857	46451	63352	57572	61971	53986	70561	70335	95624	78086	82058	58934	68599	67131	53510	63545	65624	sp|A1URA3|FTSH_BARBK *-** ATP-dependent zinc metalloprotease FtsH IPR000642 (Peptidase M41), IPR003959 (ATPase, AAA-type, core), IPR027417 (P-loop containing nucleoside triphosphate hydrolase) GO:0004222 (metalloendopeptidase activity), GO:0005524 (ATP binding), GO:0006508 (proteolysis)
5	Niben101Scf04989g02003.1	165800	171530	185450	149140	132950	177510	190800	181660	183570	155460	169800	141380	142790	129570	155270	150810	152760	148550	97768	80537	95246	100780	101730	120030	101930	104210	118990	120130	112140	121290	130910	121770	116450	106950	170890	140590	161310	183900	153530	190740	196060	158520	75183	86835	93179	sp|Q7Q9C0|ENOPH_ANOGA *-*- Enolase-phosphatase E1 IPR001303 (Class II aldolase/adducin N-terminal), IPR017714 (Methylthioribulose-1-phosphate dehydratase), IPR023214 (HAD-like domain), IPR023943 (Enolase-phosphatase E1), IPR027505 (Probable bifunctional methylthioribulose-1-phosphate dehydratase/enolase-phosphatase E1) GO:0000287 (magnesium ion binding), GO:0005737 (cytoplasm), GO:0019509 (L-meth…
5	Niben101Scf06091g06016.1	124220	69333	76085	110050	83325	235240	163380	157830	145560	83753	84783	98180	84477	95970	58636	79785	66376	78236	64646	71659	79438	83594	110230	71765	42936	64856	37732	60534	75188	66515	76592	77938	70761	76050	190350	78617	174640	97040	110070	75498	88644	93621	124640	125460	133580	sp|Q044A8|DNAJ_LACGA ***- Chaperone protein DnaJ IPR012724 (Chaperone DnaJ) GO:0005524 (ATP binding), GO:0006457 (protein folding), GO:0009408 (response to heat), GO:0031072 (heat shock protein binding), GO:0051082 (unfolded protein binding)
5	Niben101Scf03977g02005.1	162100	221560	146490	171840	206130	241480	161650	149260	153150	117920	107880	96524	70951	44479	181630	113250	119160	222110	111040	81128	113540	114980	120160	101620	100810	93960	103130	47804	126080	100660	88150	79131	135380	79582	144690	145360	146410	124530	143460	133080	150660	144030	230190	231080	219720	sp|O95563|MPC2_HUMAN **** Mitochondrial pyruvate carrier 2 IPR005336 (Mitochondrial pyruvate carrier) GO:0005743 (mitochondrial inner membrane), GO:0006850 (mitochondrial pyruvate transport)
5	Niben101Scf00317g07008.1	12522	14972	40775	27665	5968.8	31669	45626	38916	47255	15412	8831.2	25690	13095	6732.3	4874.7	14678	26615	19980	7824	21786	20424	28991	28902	29003	17047	18301	22325	22162	21280	20929	23747	17876	18958	16848	33770	39375	37027	35277	34944	37260	28681	30339	26358	26147	14821	sp|Q182E7|DNAJ_PEPD6 *-*- Chaperone protein DnaJ IPR001623 (DnaJ domain), IPR024586 (DnaJ-like protein C11, C-terminal)
5	Niben101Scf00817g04001.1	22194	21792	22094	25740	25661	26371	23582	28689	21820	24647	22570	19840	19137	23141	22558	7242.1	19584	3022	11147	16601	10878	12045	16237	15351	9288.3	10136	11764	12979	20903	18490	11367	17484	22102	19219	21630	4171.4	28423	26719	27597	21714	26779	26206	23650	23244	23533	ref|XP_007051598.1| **** NAD(P)-binding R , putative isoform 1 [Theobroma cacao] IPR001509 (NAD-dependent epimerase/dehydratase, N-terminal domain), IPR016040 (NAD(P)-binding domain) GO:0003824 (catalytic activity), GO:0050662 (coenzyme binding)
5	Niben101Scf03790g01009.1	43036	44461	38562	44984	56548	53517	51047	47241	49381	44416	44076	38650	41378	44057	42829	36746	43750	40555	25744	28254	29782	34371	35287	29134	26049	28337	26877	33126	28772	29462	37445	35221	35121	29421	56846	47775	54030	48803	48936	34680	34607	40695	35419	35547	44279	sp|G5CEW6|IF4G_WHEAT *-*- Eukaryotic translation initiation factor 4G IPR003891 (Initiation factor eIF-4 gamma, MA3), IPR016024 (Armadillo-type fold) GO:0003723 (RNA binding), GO:0005488 (binding), GO:0005515 (protein binding)
5	Niben101Scf11785g01009.1	66744	8346.1	81223	7881	72332	93707	28711	33790	9588.1	1881.6	17688	12195	7825.8	62021	7000.6	21825	14884	5009.4	4111.1	6067.4	12756	6980.8	38511	6642.5	10819	52378	8720.8	11905	4213.4	2202.3	9039.7	60084	3885.9	2708.2	9440.9	18524	81930	81263	71232	56613	41168	36081	36355	37594	46120	sp|Q2KNL5|CADH1_OCIBA ***- Cinnamyl alcohol dehydrogenase 1 IPR002085 (Alcohol dehydrogenase superfamily, zinc-type), IPR016040 (NAD(P)-binding domain), IPR020843 (Polyketide synthase, enoylreductase domain) GO:0008270 (zinc ion binding), GO:0016491 (oxidoreductase activity), GO:0055114 (oxidation-reduction process)
5	Niben101Scf07027g04006.1	192770	142220	206480	113130	96990	108220	81922	150200	170030	61273	105790	67962	142610	96025	101040	108340	59189	66741	132490	109980	87034	91093	102940	90916	10419	93537	78200	73731	110990	73719	85645	90057	129070	86630	167860	104320	173030	104830	116030	98281	117850	224700	87948	90702	143610	sp|Q9M060|IF62_ARATH ***- Eukaryotic translation initiation factor 6-2 IPR002769 (Translation initiation factor IF6) GO:0042256 (mature ribosome assembly), GO:0043022 (ribosome binding)
5	Niben101Scf08272g00018.1	98078	108610	97344	95256	103660	89419	89736	88253	90388	85040	86277	5297.5	64535	77588	3233.1	88413	92293	97190	4033.6	15222	7686	6054.8	105820	5893.5	18490	4596	5461.8	95747	88203	96497	85150	16503	79085	2332.8	89479	98916	87349	92500	91290	82488	91714	7670.2	3180.3	74470	96191	AT3G60830.1 ***- actin-related protein 7 LENGTH=363 IPR004000 (Actin family) GO:0005634 (nucleus), GO:0006325 (chromatin organization), GO:0032502 (developmental process)
5	Niben101Scf08334g00002.1	11522	19010	11347	8197	5158.1	8560.8	9439.8	15774	18175	8130.1	3037.7	14866	8383.5	2111.6	5503.3	4561.1	12074	7753.4	4691.2	7217.2	6279.7	8679.2	6614.3	5289.5	6643.5	729.78	3736.4	4778.1	5512.7	5853	5326.3	13234	5491.3	6034.3	4031.7	3805.8	14075	20115	8003.5	5208.9	5430.5	5732.2	6614.4	7222	11473	sp|Q9C952|CPSF3_ARATH ***- Cleavage and polyadenylation specificity factor subunit 3-I IPR001279 (Beta-lactamase-like), IPR011108 (RNA-metabolising metallo-beta-lactamase), IPR021718 (Pre-mRNA 3'-end-processing endonuclease polyadenylation factor C-term), IPR022712 (Beta-Casp domain)
5	Niben101Scf08987g00006.1	10691	4905.8	21381	24603	6376.1	52868	23702	17512	17073	3701.9	12304	5567.9	4862.8	12244	6680.8	4751.8	4594.5	10298	12192	11087	10694	14354	17108	12207	11847	11923	8312.2	14761	11387	13698	13893	15451	5844.5	12221	6496.2	17458	18858	17321	8614.4	22858	12334	29172	13346	14950	24375	AT5G11160.1 **** adenine phosphoribosyltransferase 5 LENGTH=191 IPR005764 (Adenine phosphoribosyl transferase), IPR029057 (Phosphoribosyltransferase-like) GO:0003999 (adenine phosphoribosyltransferase activity), GO:0005737 (cytoplasm), GO:0006168 (adenine salvage), GO:0009116 (nucleoside metabolic process)
5	Niben101Scf02918g00003.1	117320	35940	4707	6425.9	144190	137400	50118	166920	178080	34926	18612	23193	23926	39868	18140	25092	60859	21570	41595	49360	39472	63368	50885	57898	40569	54753	49752	55962	7115.4	65104	74367	84949	75362	81026	104310	82643	94581	80453	79926	78544	77109	72842	192140	181690	190050	sp|Q43792|ACCO_TOBAC ***- 1-aminocyclopropane-1-carboxylate oxidase IPR005123 (Oxoglutarate/iron-dependent dioxygenase), IPR026992 (Non-haem dioxygenase N-terminal domain), IPR027443 (Isopenicillin N synthase-like) GO:0016491 (oxidoreductase activity), GO:0016706 (oxidoreductase activity, acting on paired donors, with incorporation or reduction of molecular oxygen, 2-oxoglutarate as one donor, an…
5	Niben101Scf03284g07021.1	39788	33166	45030	15980	40163	11608	33411	47635	32582	25053	21082	20843	29296	2178.4	33796	12915	25051	22752	14101	3926.1	23286	8483.5	7112.4	22650	18182	28386	5035.3	16079	12751	11791	35119	15794	18121	11791	15932	22464	45769	39290	59785	40984	43314	22361	13874	18807	19654	AT1G15390.1 **** peptide deformylase 1A LENGTH=269 IPR000181 (Formylmethionine deformylase), IPR023635 (Peptide deformylase) GO:0005506 (iron ion binding), GO:0042586 (peptide deformylase activity)
5	Niben101Scf01750g15002.1	42137	65030	55488	48550	59729	63851	42964	47075	67490	48245	39118	35828	37449	38898	39459	42961	57112	49938	49548	27880	9722.8	36818	31021	35030	6359.3	13434	39041	63199	41819	48877	60753	56612	50768	8238.5	33251	12355	63302	15835	21661	60743	42296	69894	67981	59979	31415	AT3G52500.1 ***- Eukaryotic aspartyl protease family protein LENGTH=469 IPR001461 (Aspartic peptidase), IPR021109 (Aspartic peptidase domain) GO:0004190 (aspartic-type endopeptidase activity), GO:0006508 (proteolysis)
5	Niben101Scf00929g03009.1	256560	280920	254680	271370	313620	301780	309490	278070	290730	281130	265370	265900	148700	120180	122710	233070	250970	258200	30985	79422	83146	128230	120820	101120	106160	101830	95362	125960	131470	147520	145570	131480	126100	121190	349890	305880	500530	389540	485770	186140	434340	217560	357890	351280	313270	AT2G18600.1 ***- Ubiquitin-conjugating enzyme family protein LENGTH=185 IPR016135 (Ubiquitin-conjugating enzyme/RWD-like), IPR023313 (Ubiquitin-conjugating enzyme, active site)
5	Niben101Scf00963g02001.1	25911	27651	9218.7	29877	31807	41131	49979	49269	56979	11799	27398	26961	34627	35998	15312	8918.5	16707	28651	35500	30169	28287	27477	31634	34885	27915	12321	24423	35521	36787	37258	23635	35712	41050	33071	43980	33818	37384	36748	46834	38939	35109	34884	37294	36564	32626	AT5G27395.1 ***- Mitochondrial inner membrane translocase complex, subunit Tim44-related protein LENGTH=313 IPR007379 (Tim44-like domain)
5	Niben101Scf07944g05004.1	95356	83057	88229	29323	75671	84710	121790	95418	121080	100690	85721	75275	82020	72623	75118	86916	75371	69664	64181	73894	20393	32658	80887	57604	51457	58532	69410	80522	45611	78223	83122	40619	71191	94327	101830	123470	100800	93677	76678	79333	79315	40023	75633	88699	80748	sp|Q54JC8|PUR4_DICDI *-*- Phosphoribosylformylglycinamidine synthase
5	Niben101Scf01719g08001.1	108700	123150	37133	94496	102950	156520	38938	170170	36426	49540	39841	50572	103130	50055	58729	50957	66339	127380	35577	41556	38687	41310	36000	52875	32912	54495	57215	44388	46113	31832	45216	46836	45536	59424	81620	99520	136410	93730	118400	127560	111280	96181	89119	83853	96151	sp|Q7PC83|AB41G_ARATH ***- ABC transporter G family member 41 IPR003439 (ABC transporter-like), IPR013525 (ABC-2 type transporter), IPR013581 (Plant PDR ABC transporter associated), IPR027417 (P-loop containing nucleoside triphosphate hydrolase), IPR029481 (ABC-transporter extracellular N-terminal domain) GO:0005524 (ATP binding), GO:0016020 (membrane), GO:0016887 (ATPase activity)
5	Niben101Scf01148g02008.1	294050	326380	302640	2704400	2727200	2734900	3502000	3488100	3444000	2896300	322030	2540200	2610800	260780	2640700	311760	254150	2662000	238900	223990	206030	919320	273260	299690	252520	215630	717730	208970	136920	181850	227590	2470100	246170	150870	2788800	262290	368750	263220	312430	2186800	2106100	2139100	1780100	1795600	2092800	sp|Q6UNT2|RL5_CUCSA ***- 60S ribosomal protein L5 IPR005484 (Ribosomal protein L18/L5), IPR025607 (Ribosomal protein L5 eukaryotic/L18 archaeal, C-terminal) GO:0003735 (structural constituent of ribosome), GO:0005622 (intracellular), GO:0005840 (ribosome), GO:0006412 (translation), GO:0008097 (5S rRNA binding)
5	Niben101Scf08293g00001.1	211800	474920	253120	289350	270550	365600	468560	493030	354890	239220	322350	314670	191640	468590	216270	274870	289690	317110	184570	194720	165440	237550	250320	224550	196000	185080	243970	227030	209710	232080	264360	287360	259690	230450	186870	323560	382410	327980	347700	330290	293890	343850	310320	303000	316650	sp|P47199|QOR_MOUSE **** Quinone oxidoreductase IPR002085 (Alcohol dehydrogenase superfamily, zinc-type), IPR016040 (NAD(P)-binding domain), IPR020843 (Polyketide synthase, enoylreductase domain) GO:0008270 (zinc ion binding), GO:0016491 (oxidoreductase activity), GO:0055114 (oxidation-reduction process)
5	Niben101Scf02114g00012.1	481860	343230	378670	227490	83678	322940	208200	382110	288050	259760	110060	504120	185490	134690	94512	107150	438610	140220	223180	258600	202730	101730	94896	124960	126950	154980	118110	174500	139720	188020	112130	92819	184150	175910	239390	338480	218720	334780	223910	196870	273030	397550	216530	134510	188440	AT5G14060.1 **** Aspartate kinase family protein LENGTH=544 IPR001341 (Aspartate kinase domain) GO:0004072 (aspartate kinase activity), GO:0008152 (metabolic process), GO:0008652 (cellular amino acid biosynthetic process), GO:0016597 (amino acid binding)
5	Niben101Scf06171g02036.1	217120	137510	249900	42050	376870	362370	451500	465760	303290	202950	221260	235540	211120	207130	223410	214690	37230	345070	139140	163430	148700	196580	188940	200860	156070	161100	162500	212300	189700	192830	216530	210340	206700	188240	361110	313520	378430	351770	399700	313120	282490	293950	344140	335800	339580	sp|A7FYA5|DAPH_CLOB1 *-*- 2,3,4,5-tetrahydropyridine-2,6-dicarboxylate N-acetyltransferase IPR011004 (Trimeric LpxA-like)
5	Niben101Scf00853g07005.1	646990	155110	180640	748020	175810	121270	153720	176830	205900	119750	120170	105600	141380	154680	128420	151600	169830	134300	119230	92137	120340	89891	94781	94872	100190	123110	129970	161980	166900	131200	153630	144300	186860	177140	210230	209290	219760	279720	300460	256190	243460	249050	212180	226550	246860	sp|Q9FJX3|VDAC2_ARATH **** Mitochondrial outer membrane protein porin 2 IPR023614 (Porin domain), IPR027246 (Eukaryotic porin/Tom40) GO:0005741 (mitochondrial outer membrane), GO:0055085 (transmembrane transport)
5	Niben101Scf04500g03002.1	699100	674220	689600	811420	739660	570520	489010	626630	649470	860460	828840	555130	600580	341240	359770	502060	457120	446850	377240	397060	451010	388500	406920	465430	348040	368360	561620	445260	482590	418560	410190	393380	425040	452440	475850	500080	623770	540830	604010	668410	603010	698910	633940	510350	667660	AT2G21960.1 ***- unknown protein; LOCATED IN: chloroplast; EXPRESSED IN: 22 plant structures; EXPRESSED DURING: 13 growth stages; BEST Arabidopsis thaliana protein match is: unknown protein . LENGTH=332
5	Niben101Scf00189g06010.1	48682	56958	45143	42898	43618	36988	11735	18008	28759	11098	8128.9	61845	11375	40359	19537	15318	42897	15440	10848	10545	29662	18842	18083	17515	11721	21000	14155	18218	10343	18849	20161	17390	28095	15218	39902	17868	63536	23873	53230	34764	17389	29665	11949	22131	16970	sp|Q9JZ77|RIBB_NEIMB **** 3,4-dihydroxy-2-butanone 4-phosphate synthase IPR000422 (3,4-dihydroxy-2-butanone 4-phosphate synthase, RibB), IPR000926 (GTP cyclohydrolase II, RibA), IPR016299 (Riboflavin biosynthesis protein RibBA) GO:0003935 (GTP cyclohydrolase II activity), GO:0008686 (3,4-dihydroxy-2-butanone-4-phosphate synthase activity), GO:0009231 (riboflavin biosynthetic process)
5	Niben101Scf07030g04004.1	190860	259230	538330	128890	166750	131730	82598	289590	328130	123180	113460	399020	105310	374980	109570	149570	181390	157900	116720	119780	124920	138030	98777	118950	139400	105540	97929	139580	182880	226980	217050	161740	233850	161950	150000	186830	282180	222960	349580	200750	203460	190880	180410	230830	215140	sp|P24521|ERG8_YEAST ***- Phosphomevalonate kinase IPR005916 (Phosphomevalonate kinase, eukaryotic) GO:0005524 (ATP binding)
5	Niben101Scf02508g01001.1	90307	96414	103050	122370	94105	123470	167330	152000	181830	131620	66334	68172	111550	87492	109660	105330	100050	125510	73299	68513	51581	112460	73713	70962	54212	86940	85448	87842	67006	70153	83593	57473	61066	112480	149760	65976	143470	120000	94859	85334	77773	146420	163820	87382	100360	sp|P42784|CTPA_SYNP2 ***- Carboxyl-terminal-processing protease IPR004447 (C-terminal-processing peptidase S41A), IPR029045 (ClpP/crotonase-like domain) GO:0005515 (protein binding), GO:0006508 (proteolysis), GO:0008236 (serine-type peptidase activity)
5	Niben101Scf04624g00012.1	703110	683010	673500	732020	724350	701300	362090	623070	393380	340950	572420	519570	577170	312460	553990	545260	566570	568830	496460	504010	497540	291860	553940	559160	279560	264670	270380	461540	498260	473300	391780	477500	482620	232030	610790	594690	655550	563820	625410	515210	313980	461910	472280	508750	514730	sp|P41099|RLA2_PARAR *-*- 60S acidic ribosomal protein P2 IPR001813 (Ribosomal protein L10/L12) GO:0003735 (structural constituent of ribosome), GO:0005622 (intracellular), GO:0005840 (ribosome), GO:0006414 (translational elongation)
5	Niben101Scf01441g02001.1	105040	134590	83819	242410	256450	255590	207520	184280	149460	242180	68259	72103	130570	129690	93713	223340	62134	77854	64959	72309	31626	94320	67898	98468	50162	105880	131340	97752	89282	95964	102180	69375	83362	88366	113600	93684	90644	115390	108180	94687	63536	111530	112950	252930	244440	sp|Q8TAG9|EXOC6_HUMAN **** Exocyst complex component 6 IPR007225 (Exocyst complex subunit Sec15-like) GO:0000145 (exocyst), GO:0006904 (vesicle docking involved in exocytosis)
5	Niben101Scf11366g02026.1	72266	69333	92530	64518	82171	77400	82257	93159	112790	56289	78238	97025	44919	98289	78501	52636	106670	77550	64913	44435	50789	34156	61898	59795	53602	45793	46941	64620	67320	53157	98929	87219	65699	79028	93958	109760	74516	85475	97426	71122	63314	66456	76093	89041	86823	sp|Q4JVD9|RUVB_CORJK --** Holliday junction ATP-dependent DNA helicase RuvB IPR010339 (TIP49, C-terminal), IPR012340 (Nucleic acid-binding, OB-fold), IPR027238 (RuvB-like), IPR027417 (P-loop containing nucleoside triphosphate hydrolase) GO:0003678 (DNA helicase activity), GO:0005524 (ATP binding), GO:0043141 (ATP-dependent 5'-3' DNA helicase activity)
5	Niben101Scf03045g09001.1	17149	19907	19103	12890	21231	10608	17122	8646	9725.1	8213.9	15560	2359.3	19092	18824	8271.4	17533	16069	13779	846.43	5558.2	3922.2	11674	9336.3	11640	14250	4358	6282.4	8380.3	11118	780.9	13417	12509	8950.4	8314.8	16803	13158	12194	14375	15375	12360	13137	7661.7	12753	19736	8601.4	AT1G70570.2 ***- anthranilate phosphoribosyltransferase, putative LENGTH=632 IPR000312 (Glycosyl transferase, family 3) GO:0008152 (metabolic process), GO:0016757 (transferase activity, transferring glycosyl groups)
5	Niben101Scf05997g00011.1	53974	157420	65767	64982	75555	95089	65280	88631	87551	51973	30998	37817	18962	85819	114170	115860	42266	31660	45439	29327	43533	70183	36831	32516	24836	21057	31864	37557	30085	65597	35292	69827	55814	38343	102640	97691	103140	67736	72807	63226	78978	132670	76147	83908	85277	sp|Q9CR95|NECP1_MOUSE ***- Adaptin ear-binding coat-associated protein 1 IPR011993 (Pleckstrin homology-like domain), IPR012466 (Adaptin ear-binding coat-associated protein 1 NECAP-1)
5	Niben101Scf05690g01004.1	190630	138580	146480	181750	172730	150260	160080	149440	140690	126830	200880	123330	176570	143490	165550	199170	175500	169520	91929	105620	110510	138040	132120	113680	80235	105640	75904	143400	67461	107950	127780	139300	121850	117750	169900	175520	193840	150310	181400	161760	190160	172100	148080	158580	177900	sp|A8H759|DNAJ_SHEPA *-*- Chaperone protein DnaJ IPR001623 (DnaJ domain), IPR026894 (DNAJ-containing protein, X-domain)
5	Niben101Scf02090g06011.1	134390	135890	114530	78722	106020	104620	129240	131650	104140	85170	99617	125730	60947	125550	141970	72057	41335	53022	84792	83131	69404	87121	60590	50228	80613	81628	94512	67181	104170	81968	85661	78028	78280	51837	94582	117480	83434	76728	151740	46810	93740	102690	177490	146280	87748	AT1G71810.1 **** Protein kinase superfamily protein LENGTH=692 IPR011009 (Protein kinase-like domain) GO:0004672 (protein kinase activity), GO:0005524 (ATP binding), GO:0006468 (protein phosphorylation), GO:0016772 (transferase activity, transferring phosphorus-containing groups)
5	Niben101Scf02425g02007.1	249320	251740	252820	280120	295980	294870	300520	301330	284810	367950	248600	171930	328240	131740	267810	108340	156120	221110	256510	177980	174960	222570	145630	210530	187890	151810	211770	204530	113210	115450	246100	133820	224980	239900	202350	175010	359710	123010	328950	204180	203420	222760	258830	213490	198920	AT5G12040.1 *-*- Nitrilase/cyanide hydratase and apolipoprotein N-acyltransferase family protein LENGTH=369 IPR003010 (Carbon-nitrogen hydrolase) GO:0006807 (nitrogen compound metabolic process), GO:0016810 (hydrolase activity, acting on carbon-nitrogen (but not peptide) bonds)
5	Niben101Scf04007g01012.1	370310	381640	340710	373320	355570	362180	321410	380400	343070	365610	326790	405550	355360	338110	330820	262760	267550	261740	188540	189900	178130	233150	239110	234330	206590	183340	189450	248380	241960	234290	228740	208050	205740	242030	244880	263010	461850	360040	391290	379220	374650	373640	360200	367960	392600	sp|P25792|CYSP_SCHMA **** Cathepsin B-like cysteine proteinase IPR000118 (Granulin), IPR013128 (Peptidase C1A), IPR025660 (Cysteine peptidase, histidine active site), IPR025661 (Cysteine peptidase, asparagine active site) GO:0006508 (proteolysis), GO:0008234 (cysteine-type peptidase activity)
5	Niben101Scf01070g03003.1	157980	158150	163270	175130	173020	174070	132370	106530	91017	129060	130470	130520	162520	140250	162270	131540	150800	134270	101890	100040	99163	100300	91843	94070	91730	92549	92937	93388	86580	91950	102830	102010	97690	99850	135860	128350	137730	157610	139180	137840	139990	126220	136110	140340	171110	sp|Q9YGP5|RBPMS_XENLA *-** RNA-binding protein with multiple splicing IPR012677 (Nucleotide-binding alpha-beta plait domain), IPR024888 (U1 small nuclear ribonucleoprotein A/U2 small nuclear ribonucleoprotein B'') GO:0000166 (nucleotide binding), GO:0000398 (mRNA splicing, via spliceosome), GO:0003676 (nucleic acid binding), GO:0017069 (snRNA binding)
5	Niben101Scf07109g01003.1	25508	3325.8	23067	26612	25487	24066	24430	25777	26627	18643	21840	19939	17565	17201	16610	17358	18238	18456	16243	16352	16888	17305	16808	5620.5	9096.8	12624	13404	14817	20453	18161	15598	16719	23511	16048	27039	23944	29191	25992	29589	24440	23327	25067	24716	23130	23631	AT2G20990.3 ***- synaptotagmin A LENGTH=579 IPR000008 (C2 domain) GO:0005515 (protein binding)
5	Niben101Scf07465g01016.1	5146.1	7467.8	6909.2	15048	35697	27975	35229	6252.7	12822	6553.5	5341.6	4721.6	8360.5	10580	18625	7220.7	13276	9097.5	3590.7	10033	4685.2	8484.5	5940.2	6508.9	8196	9073.9	3195.1	10197	6085.2	10257	2340.5	10384	2080.1	4438.7	19581	12064	18983	22407	13320	14797	8902.1	11196	11565	3892.9	11749	sp|Q9FXI5|IQD32_ARATH ***- Protein IQ-DOMAIN 32 IPR000048 (IQ motif, EF-hand binding site), IPR025064 (Domain of unknown function DUF4005) GO:0005515 (protein binding)
5	Niben101Scf01182g03013.1	68802	72313	60331	74081	73964	77095	79287	82730	93267	94888	81474	83800	67934	47144	67046	74048	81437	75777	49689	43814	46155	43585	40632	41127	44009	48483	52814	43173	45203	45382	43140	9464.6	38936	50595	70415	54511	113710	59109	102760	83202	81522	83244	19286	69283	95248	sp|Q9SDS7|VATC_ARATH **** V-type proton ATPase subunit C IPR004907 (ATPase, V1 complex, subunit C) GO:0015078 (hydrogen ion transmembrane transporter activity), GO:0015991 (ATP hydrolysis coupled proton transport), GO:0033180 (proton-transporting V-type ATPase, V1 domain)
5	Niben101Scf09075g00006.1	92776	79061	81416	53073	66862	128150	54648	113780	73025	59213	75141	45062	53943	62354	97175	140510	75669	140330	56086	72216	25744	49246	46227	37145	48670	43983	44452	90187	42334	107360	109210	47810	57019	80065	76425	77898	75438	66466	88787	91660	80373	83354	54711	105650	85770	sp|Q5RBU7|PCP_PONAB **** Lysosomal Pro-X carboxypeptidase IPR008758 (Peptidase S28), IPR029058 (Alpha/Beta hydrolase fold) GO:0006508 (proteolysis), GO:0008236 (serine-type peptidase activity)
5	Niben101Scf05620g01002.1	73352	94851	64160	83737	97356	55960	65236	90159	59677	57159	60054	66952	65807	103510	108410	56959	50606	56951	60283	53549	51253	53543	64928	64095	44200	30447	32037	57381	48504	60036	63376	52203	43875	12654	81766	81280	92201	87452	99579	75631	73305	75248	46431	69816	83970	sp|Q8RU27|UPTG2_SOLTU ***- Alpha-1,4-glucan-protein synthase [UDP-forming] 2 IPR004901 (Reversibly glycosylated polypeptide family), IPR029044 (Nucleotide-diphospho-sugar transferases) GO:0016866 (intramolecular transferase activity), GO:0030244 (cellulose biosynthetic process)
5	Niben101Scf08176g00008.1	35534	42795	37045	46128	43254	45197	73282	89006	61701	37405	76060	26029	38531	41713	39985	35906	17764	41423	29071	51083	28536	29385	27051	22373	22937	28403	27717	37194	35519	85427	35881	47070	47197	63436	55639	57959	69451	60022	77042	15436	46516	50073	53644	52995	55685	AT3G13060.2 ***- evolutionarily conserved C-terminal region 5 LENGTH=634 IPR007275 (YTH domain)
5	Niben101Scf31228g00005.1	434100	332040	349790	406120	369210	382810	408430	465490	498940	492930	594790	540310	178360	224480	220380	489030	490950	483390	280420	281000	185410	198130	167550	173390	199920	196400	200440	344400	301650	336970	399570	403030	236950	231680	334760	310020	494090	417450	434560	338480	347320	351470	379500	374690	414100	sp|P09003|MI25_TOBAC **** ATP synthase protein MI25 IPR008688 (ATPase, F0 complex, B chain/subunit B/MI25) GO:0000276 (mitochondrial proton-transporting ATP synthase complex, coupling factor F(o)), GO:0015078 (hydrogen ion transmembrane transporter activity), GO:0015986 (ATP synthesis coupled proton transport)
5	Niben101Scf02077g12029.1	11797	13544	12160	12228	16090	22262	12226	9424.4	14120	13809	3723.6	12340	13579	12268	13126	4716.2	13892	8281	5606.4	8430.1	6205.9	5188	9047.2	12611	6135	5917.9	3530.7	10660	15884	13233	13825	17084	18710	16941	16320	5104.6	15049	12428	17482	11865	14535	16668	17675	16225	13112	sp|P59015|VPS18_DANRE *-*- Vacuolar protein sorting-associated protein 18 homolog IPR000547 (Clathrin, heavy chain/VPS, 7-fold repeat), IPR013083 (Zinc finger, RING/FYVE/PHD-type) GO:0006886 (intracellular protein transport), GO:0016192 (vesicle-mediated transport)
5	Niben101Scf04117g10023.1	11020	16384	66962	48233	51219	49807	62733	27626	80819	32925	40408	20554	12672	39850	66464	32223	60431	36148	10722	23749	20505	29500	16148	12396	15859	35962	14185	44133	19551	19485	50808	35912	14503	36739	67481	44660	61467	46080	48223	15091	45358	47528	23364	72108	59594	sp|Q9SJ40|VPS11_ARATH ***- Vacuolar protein-sorting-associated protein 11 homolog IPR011990 (Tetratricopeptide-like helical domain), IPR013083 (Zinc finger, RING/FYVE/PHD-type), IPR015943 (WD40/YVTN repeat-like-containing domain), IPR016528 (Vacuolar protein sorting-associated protein 11), IPR024763 (Vacuolar protein sorting protein 11, C-terminal) GO:0005515 (protein binding), GO:0006886 (intrac…
5	Niben101Scf06933g02001.1	34524	5335.1	29542	2563.3	37570	34430	42218	8978.2	7750.2	8684.1	4263.3	17308	22326	10495	19614	15826	3379.7	7417.4	2215.4	3166.3	3078.6	10083	6433.3	9411	12970	5910.6	4256.4	9092.6	7694.9	1297.9	10031	7946.6	10617	15656	33397	31177	24183	7988	4071.7	31734	9451.8	3250	2862.4	25095	29781	AT2G24360.1 **** Protein kinase superfamily protein LENGTH=411 IPR011009 (Protein kinase-like domain) GO:0004672 (protein kinase activity), GO:0004674 (protein serine/threonine kinase activity), GO:0005524 (ATP binding), GO:0006468 (protein phosphorylation), GO:0016772 (transferase activity, transferring phosphorus-containing groups)
5	Niben101Scf00421g01021.1	36557	43482	31198	34068	31286	32811	32013	33331	30282	32474	28574	31064	25711	23120	27937	34718	37793	36973	4027.5	14528	4931.5	4353.1	19021	18973	1142.2	13336	13875	21704	12893	14084	22491	15656	17510	2043.3	34983	18235	43377	27010	30893	6578.2	27046	32144	26049	26018	27525	AT1G63940.2 **** monodehydroascorbate reductase 6 LENGTH=493 IPR013027 (FAD-dependent pyridine nucleotide-disulphide oxidoreductase), IPR023753 (Pyridine nucleotide-disulphide oxidoreductase, FAD/NAD(P)-binding domain) GO:0016491 (oxidoreductase activity), GO:0050660 (flavin adenine dinucleotide binding), GO:0055114 (oxidation-reduction process)
5	Niben101Scf07365g01022.1	53818	52772	52053	47686	78035	35618	53099	36598	56502	65001	30268	57941	27808	46409	27527	68647	36563	66856	59715	52090	29912	5810.4	16818	9505.5	9777.3	5002.6	25721	52087	31335	62990	25677	59622	68146	57515	59884	54365	59278	55042	55984	44071	54092	45063	26148	48643	52382	sp|Q6FRB7|IPYR_CANGA **** Inorganic pyrophosphatase IPR008162 (Inorganic pyrophosphatase) GO:0000287 (magnesium ion binding), GO:0004427 (inorganic diphosphatase activity), GO:0005737 (cytoplasm), GO:0006796 (phosphate-containing compound metabolic process)
5	Niben101Scf02174g03007.1	22765	127150	135800	113420	113530	199700	113850	235180	124880	96540	113540	209840	214820	126060	123950	110510	110630	115220	106820	127430	93886	59688	84452	29497	15985	28280	80303	63826	27213	90720	103510	100170	112860	20707	115610	138100	139390	110910	235930	106060	119860	124980	119720	122840	130280	sp|P74158|SUHB_SYNY3 **** Inositol-1-monophosphatase IPR000760 (Inositol monophosphatase) GO:0046854 (phosphatidylinositol phosphorylation)
5	Niben101Scf03652g03002.1	23034	23089	1949.7	21678	28395	23392	28151	30697	25941	17996	18204	19392	6935.1	17145	18825	11507	15049	22296	13332	20646	20136	3777.1	6621	10645	5616.5	3572.1	8420.8	12894	14878	3451.8	10236	18921	23578	12545	26056	28035	26216	26496	28230	16835	20853	25448	17175	20003	25147	sp|A4WIZ3|RS19_PYRAR **** 30S ribosomal protein S19 IPR002222 (Ribosomal protein S19/S15), IPR023575 (Ribosomal protein S19, superfamily) GO:0003723 (RNA binding), GO:0003735 (structural constituent of ribosome), GO:0005840 (ribosome), GO:0006412 (translation), GO:0015935 (small ribosomal subunit)
5	Niben101Scf05567g00002.1	14020	12912	3620.6	12588	12361	17902	13073	12852	819.04	18292	7648.7	4077.7	13105	3191.7	5520.3	5939.1	15002	4244.5	2587	3350	5961.1	1907.1	4552.7	5904	2159.4	2580.1	3424.2	7510	4619.4	2132.6	4225.3	5488.2	6616.8	3793.2	11106	7349.9	10404	13970	8716.1	11445	14805	12881	8567.1	9855.5	12693	sp|Q9M0Y8|NSF_ARATH *-*- Vesicle-fusing ATPase IPR009010 (Aspartate decarboxylase-like domain), IPR029067 (CDC48 domain 2-like)
5	Niben101Scf00163g17006.1	86584	91654	88229	79094	74913	80930	105490	109990	115730	81712	89872	92429	94377	87178	65480	70061	85493	76105	62092	62021	5152.5	78286	80962	77594	7748.2	62968	66869	72762	52237	72687	84486	82488	83716	86308	107050	90983	97192	86214	90304	72287	74557	82369	83492	84534	84139	sp|O65806|MGN_EUPLA ***- Protein mago nashi homolog IPR004023 (Mago nashi protein) GO:0005634 (nucleus)
5	Niben101Scf02300g00021.1	8242.9	84783	9944.7	11892	22386	15782	71861	71383	81352	8794	62413	4627.4	56814	55669	61971	3717.3	7817.7	3658.5	17421	2958	8403.2	11254	15178	20777	9556.1	9267.4	5871.2	20469	7447.4	14276	10917	12635	4484.9	14859	5304.7	13326	64727	63610	15533	16145	13383	16485	6440.5	51295	25288	AT5G05200.1 ***- Protein kinase superfamily protein LENGTH=540 IPR011009 (Protein kinase-like domain) GO:0016772 (transferase activity, transferring phosphorus-containing groups)
5	Niben101Scf11444g00004.1	10481	27082	21637	34642	28537	50785	39289	65416	31119	27961	44469	12301	23291	32734	42428	22994	24033	32264	19666	22764	28453	15321	28065	25808	4846.3	5926.6	14140	25300	25898	23085	26824	24278	15920	15986	29972	34458	46480	38971	41928	29423	23390	45123	20222	24713	46640	AT1G79790.1 ***- Haloacid dehalogenase-like hydrolase (HAD) superfamily protein LENGTH=245 IPR023214 (HAD-like domain)
5	Niben101Scf18218g00001.1	31496	30134	15897	26368	32305	15255	61564	58349	23330	17247	24407	11133	2913.6	24080	23683	22322	14792	42920	4392.7	10189	1630.3	11307	21169	1570.6	38987	16365	6186.3	5839.4	7635.4	3314.9	8670.9	11803	10369	10037	14360	18012	50174	28034	26507	11376	12102	40144	17698	17516	13177	sp|B0CQN9|TVP23_LACBS **** Golgi apparatus membrane protein TVP23 IPR008564 (Protein of unknown function DUF846, eukaryotic) GO:0016021 (integral component of membrane)
5	Niben101Scf01826g02016.1	10814	5364.7	11380	28752	8883	25618	7485.4	27282	25272	20510	4853.8	7079.6	10631	16754	21184	9232.2	16036	13395	4455.8	9209.4	2498.5	11325	12628	6885.7	7899.3	12596	2450.2	11916	6122.7	16024	10685	2549.9	3203.6	6935.9	4987.5	8488.6	18490	8457.2	13743	5712.9	11205	16596	18583	4994.6	23828	sp|Q9ZRB0|TBB3_WHEAT **** Tubulin beta-3 chain IPR000217 (Tubulin), IPR023123 (Tubulin, C-terminal) GO:0000930 (gamma-tubulin complex), GO:0003924 (GTPase activity), GO:0005525 (GTP binding), GO:0005874 (microtubule), GO:0006184 (GTP catabolic process), GO:0007017 (microtubule-based process), GO:0007020 (microtubule nucleation), GO:0031122 (cytoplasmic microtubule organization), GO:0043234 (prote…
5	Niben101Scf08859g00010.1	35180	69016	80229	64507	58100	64501	38839	43972	31589	51714	43150	49402	49558	48987	55776	46483	53491	46988	27557	23779	24267	26350	28853	28832	31099	36591	32652	24716	24102	39360	42209	25957	30166	44267	53764	43841	16713	47501	103340	79431	26794	37390	20458	83839	106340	Unknown protein
5	Niben101Scf03978g04007.1	73719	17970	22886	15538	35820	28894	42730	18573	23285	25408	15778	29049	23958	11211	24719	12152	11317	15305	7100.5	22430	15426	16929	25314	17644	13641	4693.4	15219	28672	17314	21061	25166	14959	29437	16234	19422	35274	35417	31236	22141	21221	13572	28623	24314	10274	36824	sp|F4IAT2|THOC2_ARATH ***- THO complex subunit 2 IPR008896 (Uncharacterised protein family Ycf1), IPR018781 (Transmembrane protein adipocyte-associated 1), IPR021418 (THO complex, subunitTHOC2, C-terminal), IPR021726 (THO complex, subunitTHOC2, N-terminal)
5	Niben101Scf00885g16001.1	150650	84912	29547	4162.6	55717	16320	63106	71212	78895	67219	68358	29152	37470	11618	15756	9154.7	17040	16810	35563	13922	4892	20526	10988	38414	13376	9487.7	25763	17544	21200	21014	48709	16362	26235	6661.3	26903	26738	24362	41770	41439	8418.2	85463	74775	17715	86237	88453	AT1G30300.1 ***- Metallo-hydrolase/oxidoreductase superfamily protein LENGTH=324 IPR001279 (Beta-lactamase-like)
5	Niben101Scf05306g01007.1	10454	12739	42677	37242	42530	16300	19475	17378	63810	12426	8196.6	8800	4555.4	11379	11213	11702	23360	48233	15307	14363	9182.8	13148	10290	9676.6	15795	16041	13953	17249	7763.7	17069	21485	16247	12014	18385	26846	26202	45660	17798	17819	42059	38367	38440	39194	39083	20349	AT5G42870.1 *-*- phosphatidic acid phosphohydrolase 2 LENGTH=930 IPR007651 (Lipin, N-terminal), IPR013209 (LNS2, Lipin/Ned1/Smp2), IPR023214 (HAD-like domain)
6	Niben101Scf05216g04001.1	900240	833940	789350	748790	728720	770910	615330	524050	638520	1022700	866460	870350	1075400	1090000	1051700	979970	968600	960720	769190	748310	740330	810190	821210	813720	641080	686260	641490	994560	948670	965460	1052900	1037100	1003100	928120	1184400	1277400	1756500	1835100	1870700	1533500	1526200	1626300	1509600	1564600	1735700	AT1G54340.1 **** isocitrate dehydrogenase LENGTH=416 IPR004790 (Isocitrate dehydrogenase NADP-dependent), IPR024084 (Isopropylmalate dehydrogenase-like domain) GO:0000287 (magnesium ion binding), GO:0004450 (isocitrate dehydrogenase (NADP+) activity), GO:0006102 (isocitrate metabolic process), GO:0016616 (oxidoreductase activity, acting on the CH-OH group of donors, NAD or NADP as acceptor), GO:0…
6	Niben101Scf06910g05004.1	326420	335940	347990	301600	306280	292950	368310	346960	282760	314170	284360	236580	260720	297450	266370	292150	298390	315110	252460	249000	253540	304200	313820	297430	377710	273470	353620	296540	257910	252390	253570	304770	246670	374130	443940	319270	513550	476780	512030	378630	362870	377780	723780	533320	569580	sp|Q31KX4|PROA_SYNE7 **** Gamma-glutamyl phosphate reductase IPR001057 (Glutamate/acetylglutamate kinase), IPR016161 (Aldehyde/histidinol dehydrogenase) GO:0003824 (catalytic activity), GO:0004349 (glutamate 5-kinase activity), GO:0004350 (glutamate-5-semialdehyde dehydrogenase activity), GO:0005737 (cytoplasm), GO:0006561 (proline biosynthetic process), GO:0008152 (metabolic process), GO:0016491…
6	Niben101Scf00376g02001.1	450820	468050	453600	539390	516240	555600	562410	523820	529770	495670	454860	473140	398160	372740	395150	448930	378280	450900	414400	404020	406030	431630	412460	419310	435510	426370	432950	486090	486140	495980	557130	567210	576160	501690	663480	229180	800470	733890	756910	801230	802280	797810	767210	776020	862030	sp|Q9SDS7|VATC_ARATH **** V-type proton ATPase subunit C IPR004907 (ATPase, V1 complex, subunit C) GO:0015078 (hydrogen ion transmembrane transporter activity), GO:0015991 (ATP hydrolysis coupled proton transport), GO:0033180 (proton-transporting V-type ATPase, V1 domain)
6	Niben101Scf00779g06009.1	182140	221920	182160	190440	175300	151900	252390	292980	238260	507530	401900	431910	349070	315470	361080	388830	376770	340440	479870	435070	457300	460180	447640	476000	345280	424030	407700	1160500	1058500	1008000	1301000	1267300	1246900	987450	1130800	1100800	3963700	3399400	3586400	2405300	2427300	2561000	2914200	2883700	3064800	sp|Q9XG54|OPR1_SOLLC **** 12-oxophytodienoate reductase 1 IPR013785 (Aldolase-type TIM barrel) GO:0003824 (catalytic activity), GO:0010181 (FMN binding), GO:0016491 (oxidoreductase activity), GO:0055114 (oxidation-reduction process)
6	Niben101Scf00449g04003.1	247550	257720	246970	240290	300830	287810	285520	287570	278200	355480	328870	345780	378520	378520	348870	357090	357310	355530	307390	308080	339430	400630	357830	390150	347340	305250	342860	471730	534080	518630	505470	523320	509380	487390	622140	674050	982390	1090000	1125100	906340	923080	887230	968930	983380	1111400	AT3G55410.1 **** 2-oxoglutarate dehydrogenase, E1 component LENGTH=1017 IPR011603 (2-oxoglutarate dehydrogenase E1 component), IPR029061 (Thiamin diphosphate-binding fold) GO:0004591 (oxoglutarate dehydrogenase (succinyl-transferring) activity), GO:0006099 (tricarboxylic acid cycle), GO:0008152 (metabolic process), GO:0016624 (oxidoreductase activity, acting on the aldehyde or oxo group of donors…
6	Niben101Scf01934g04020.1	599240	576670	920780	576950	985450	976990	602860	1062700	1084600	482790	465330	547630	451480	563980	437410	437220	486810	459190	499950	376640	394580	750450	756780	803070	746240	438880	735250	522770	466640	804980	940090	548730	919310	472400	743000	537100	1240400	1351600	1210700	827310	983180	944540	1366300	1268600	1311800	sp|Q8LGG8|USPAL_ARATH *-** Universal stress protein A-like protein IPR006015 (Universal stress protein A) GO:0006950 (response to stress)
6	Niben101Scf07275g02012.1	27488	35415	87736	32490	54042	23755	30088	28520	24304	70754	78158	62907	57706	59133	75110	66412	62544	70367	66553	68363	73526	69574	83190	79162	74523	57046	71723	81849	73214	80403	100550	106690	103600	86263	98947	101340	212400	187940	184370	129110	129920	138140	200150	184780	202700	sp|P17156|HSP72_MOUSE ***- Heat shock-related 70 kDa protein 2 IPR013126 (Heat shock protein 70 family), IPR029047 (Heat shock protein 70kD, peptide-binding domain), IPR029048 (Heat shock protein 70kD, C-terminal domain)
6	Niben101Scf03385g02011.1	54413	47415	50944	51049	25678	57817	25190	85669	48443	107840	104150	106730	71144	93864	93451	85794	77077	103560	135070	107120	116940	74987	132070	98883	116970	95640	112570	109470	208390	218390	239660	220150	255700	318650	351890	329830	1082100	1060300	1060600	548620	577970	634690	1664200	1658700	1857800	AT2G15220.1 ***- Plant basic secretory protein (BSP) family protein LENGTH=225 IPR007541 (Uncharacterised protein family, basic secretory protein)
6	Niben101Scf00994g00001.1	36236	36309	34760	43812	26245	46155	60330	33995	38095	44360	59453	55777	60329	56965	72058	46326	48947	58327	60896	60940	56652	57756	68024	68038	59934	65019	52872	47261	70280	50822	80457	74043	90113	72991	94856	83756	167520	152750	165180	177070	205290	69673	169170	167520	128610	sp|P58050|C71BD_ARATH ***- Cytochrome P450 71B13 IPR001128 (Cytochrome P450) GO:0005506 (iron ion binding), GO:0016705 (oxidoreductase activity, acting on paired donors, with incorporation or reduction of molecular oxygen), GO:0020037 (heme binding), GO:0055114 (oxidation-reduction process)
6	Niben101Scf03191g04002.1	59890	267320	106770	109290	104570	159790	138650	172850	196900	266080	292470	311270	235900	325690	331590	357280	203140	299030	149800	152780	256940	318750	229720	319930	236710	187460	225060	704230	758750	642220	841500	784190	763570	418940	290290	499680	2476000	2214800	2313900	2123100	2118600	2074100	1928500	1967000	2026500	AT1G03220.1 ***- Eukaryotic aspartyl protease family protein LENGTH=433 IPR001461 (Aspartic peptidase), IPR021109 (Aspartic peptidase domain) GO:0004190 (aspartic-type endopeptidase activity), GO:0006508 (proteolysis)
6	Niben101Scf22058g00007.1	311560	305100	308560	301060	311680	291700	235560	226600	246660	419070	382780	373910	408220	383960	403340	380910	369380	365110	322490	337830	322640	307240	338620	326780	306250	333930	340860	368960	374110	379000	398810	376150	373850	395750	463040	483620	521240	584590	590020	501810	493900	513380	567020	564760	615710	emb|CDX95231.1| *-*- BnaC09g16390D [Brassica napus]
6	Niben101Scf00640g04023.1	78879	110750	96041	138360	229590	173500	143360	167640	228640	257870	335840	179980	404110	223940	166490	231520	312240	151090	328380	276110	343870	339010	287170	308390	274970	381800	409390	1321100	1285000	1271300	1747700	1748600	1787100	1545700	1738600	1572800	5980600	5065400	5349400	4514500	4501900	2829400	3389400	3338600	3538700	sp|Q0IIS3|EPHX3_XENTR ***- Epoxide hydrolase 3 IPR000639 (Epoxide hydrolase-like), IPR029058 (Alpha/Beta hydrolase fold) GO:0003824 (catalytic activity)
6	Niben101Scf02171g00007.1	142900	110370	96454	102750	97624	106770	198010	184510	77788	483650	311080	389480	601710	412120	632200	272110	282230	304800	210740	251650	276250	534950	541030	509250	287150	439870	472170	985490	1031700	1088300	1113200	1097600	1124900	775460	1238200	1240500	3047300	2732100	2825900	2639600	2598700	2565300	2680700	2725300	2971000	gb|AAT40038.1| **** chitinase [Zea mays subsp. parviglumis] IPR016283 (Glycoside hydrolase, family 19), IPR023346 (Lysozyme-like domain) GO:0004568 (chitinase activity), GO:0005975 (carbohydrate metabolic process), GO:0006032 (chitin catabolic process), GO:0008061 (chitin binding), GO:0016998 (cell wall macromolecule catabolic process)
6	Niben101Scf12789g00006.1	54753	80340	65411	58684	62689	58780	46078	60017	75242	119050	127940	103340	130510	131130	142200	102480	87334	93755	132530	131830	132770	92684	85087	98453	87371	75438	51035	152910	155840	159160	200470	215590	206140	278900	238050	196570	442930	501350	505940	306350	377820	351870	589400	620820	663260	sp|Q9LV60|CRR55_ARATH ***- Cysteine-rich repeat secretory protein 55 IPR002902 (Gnk2-homologous domain)
6	Niben101Scf00163g23018.1	78335	65278	70331	78072	74963	79249	80026	81869	77034	67082	61312	39191	53869	54791	56180	63305	61835	52267	71275	47578	69031	45100	84941	52241	48463	55644	56121	79425	69909	61467	72757	70704	78206	78212	99806	113790	177760	148840	145000	111700	108610	119400	150750	153820	166720	sp|B0S230|PFKA_FINM2 *-** ATP-dependent 6-phosphofructokinase IPR000023 (Phosphofructokinase domain), IPR012004 (Pyrophosphate-dependent phosphofructokinase TP0108), IPR022953 (Phosphofructokinase) GO:0003872 (6-phosphofructokinase activity), GO:0005524 (ATP binding), GO:0006002 (fructose 6-phosphate metabolic process), GO:0006096 (glycolytic process)
6	Niben101Scf00637g04001.1	74330	71951	50647	101040	40571	83286	27305	39166	41889	116860	106180	94778	88484	108780	87417	56965	87406	93054	38041	21072	19732	49403	34268	27855	78979	46885	59056	79918	62034	71341	86394	88758	69629	90403	77679	81818	117360	112860	123240	94004	81316	102620	96349	104690	90827	AT5G06860.1 ***- polygalacturonase inhibiting protein 1 LENGTH=330 IPR001611 (Leucine-rich repeat), IPR013210 (Leucine-rich repeat-containing N-terminal, type 2) GO:0005515 (protein binding)
6	Niben101Scf08531g03030.1	17089	18441	22704	20083	16190	16828	6429.1	4621.2	4421.6	28438	22038	21631	23648	20692	22641	23206	20061	23905	26327	28243	21708	14941	15368	14107	23296	24728	27578	20498	24832	20373	26965	22691	25147	29319	13776	33807	12502	45667	35845	40081	41777	48294	51318	58643	61923	AT1G72170.1 ***- Domain of unknown function (DUF543) LENGTH=102 IPR007512 (Protein of unknown function DUF543)
6	Niben101Scf04078g00002.1	26037	31535	27041	33056	31451	26970	22107	19407	15558	37237	37278	35872	33099	37002	36396	23470	36682	35688	34078	32774	30580	8161.6	8150.7	6800.3	30055	29931	26218	30702	25111	21857	17420	16011	13662	17711	23198	31311	38943	52854	44439	50235	49622	56658	59960	65878	68183	AT1G73260.1 **** kunitz trypsin inhibitor 1 LENGTH=215 IPR002160 (Proteinase inhibitor I3, Kunitz legume) GO:0004866 (endopeptidase inhibitor activity)
6	Niben101Scf09087g00015.1	36664	42839	33558	47689	67309	48269	43723	48234	50277	43689	34852	9604.6	27659	11942	39967	36626	35606	17973	31916	32892	27644	44159	28213	18700	39274	36315	36331	46915	40037	45228	46213	47450	49725	40404	20672	49938	82573	68892	75062	46102	55632	55710	60093	51729	65184	sp|Q6AYS7|ACY1A_RAT *-*- Aminoacylase-1A IPR002933 (Peptidase M20) GO:0008152 (metabolic process), GO:0016787 (hydrolase activity)
6	Niben101Scf08293g02003.1	29183	35516	31099	36552	28364	26098	12969	7073.5	8498.1	47895	41526	40945	47005	46565	46522	39399	41217	39869	23103	25424	24436	25279	28468	26658	24950	23282	23619	32870	32965	31671	31415	31970	36724	29759	24044	46459	11878	49145	45699	45535	41635	39742	38551	44191	43478	sp|P55258|RAB8A_MOUSE ***- Ras-related protein Rab-8A IPR001806 (Small GTPase superfamily), IPR002041 (Ran GTPase), IPR005225 (Small GTP-binding protein domain), IPR024156 (Small GTPase superfamily, ARF type), IPR027417 (P-loop containing nucleoside triphosphate hydrolase) GO:0003924 (GTPase activity), GO:0005525 (GTP binding), GO:0005622 (intracellular), GO:0006184 (GTP catabolic process), GO:00…
6	Niben101Scf06914g00003.1	64976	77333	65806	60902	50510	60002	68767	76267	73011	79244	82135	69677	82124	82369	94500	71753	78641	79954	54104	49067	51716	70819	68657	66928	58999	55062	59165	72906	77961	69531	85081	82058	85632	73665	81024	77565	126760	106370	109830	100510	96641	101000	103280	102260	112160	sp|P0A0A1|ODPB_STAAM **** Pyruvate dehydrogenase E1 component subunit beta IPR005475 (Transketolase-like, pyrimidine-binding domain), IPR005476 (Transketolase, C-terminal), IPR009014 (Transketolase, C-terminal/Pyruvate-ferredoxin oxidoreductase, domain II), IPR027110 (Pyruvate dehydrogenase E1 component subunit beta), IPR029061 (Thiamin diphosphate-binding fold) GO:0003824 (catalytic activity), G…
6	Niben101Scf00779g08010.1	152660	175110	143210	24469	183630	100370	267570	24998	264730	558070	550230	543420	505290	535040	542030	431520	470070	444320	401720	437330	421470	470560	469050	484960	390380	374070	350820	1059100	1063300	1040000	1248400	1237700	1237400	978100	1197200	1026200	3689500	3111300	3086900	2390800	2314900	2348100	2533400	2488300	2798800	sp|Q9XG54|OPR1_SOLLC **** 12-oxophytodienoate reductase 1 IPR013785 (Aldolase-type TIM barrel) GO:0003824 (catalytic activity), GO:0010181 (FMN binding), GO:0016491 (oxidoreductase activity), GO:0055114 (oxidation-reduction process)
6	Niben101Scf01334g06004.1	1677400	1998200	2288600	1879300	2126800	1941000	2221400	1946000	2043200	2675800	2413000	2367200	1818800	2160700	1635600	2703900	2499900	2789900	1647200	1823100	1999900	2055600	2229400	1359600	1787800	2202000	1927600	2093600	2097000	2162600	2356000	2250400	2121300	2336600	2047200	2873600	3063300	3427100	3634200	3457200	3519400	3233000	3880700	3772000	4323100	sp|P0A9P2|DLDH_ECO57 **** Dihydrolipoyl dehydrogenase IPR006258 (Dihydrolipoamide dehydrogenase), IPR013027 (FAD-dependent pyridine nucleotide-disulphide oxidoreductase), IPR016156 (FAD/NAD-linked reductase, dimerisation domain), IPR023753 (Pyridine nucleotide-disulphide oxidoreductase, FAD/NAD(P)-binding domain) GO:0004148 (dihydrolipoyl dehydrogenase activity), GO:0016491 (oxidoreductase activi…
6	Niben101Scf02349g03002.1	163950	159750	50205	259680	211150	178960	92908	70883	105920	70210	84097	106370	36971	104610	69530	87641	50577	75049	116870	98862	119460	81510	79842	114840	62678	74420	73259	123710	153480	106320	194200	196330	222220	93398	95811	102310	643930	680170	628200	662970	555100	587320	825600	870560	741810	sp|Q9FLC0|PER52_ARATH **** Peroxidase 52 IPR010255 (Haem peroxidase) GO:0004601 (peroxidase activity), GO:0006979 (response to oxidative stress), GO:0020037 (heme binding), GO:0055114 (oxidation-reduction process)
6	Niben101Scf00135g00025.1	365550	432570	474890	413220	349820	354300	340070	423600	388450	347580	412300	262070	340140	336140	329740	358130	364710	391790	312180	392310	392020	386620	584940	477440	311540	475750	343570	366030	407440	388130	364310	575030	385750	368600	415550	441830	642630	575500	493690	535380	472820	609320	759540	751670	678050	sp|Q9T0I8|MTN1_ARATH ***- 5'-methylthioadenosine/S-adenosylhomocysteine nucleosidase 1 IPR018017 (Nucleoside phosphorylase) GO:0003824 (catalytic activity), GO:0009116 (nucleoside metabolic process)
6	Niben101Scf08130g00016.1	582260	382280	421320	345000	305940	197750	403170	401610	514310	584280	508880	507370	521060	747270	617690	401610	409410	332240	351960	392310	303890	395440	410400	386110	384840	332820	386740	882770	853900	893100	1256300	1185000	1164000	1079700	1120100	1238500	3506900	3281000	3464600	2598100	2596800	2522900	1924300	1885700	1949000	sp|Q9SR36|GSTU8_ARATH ***- Glutathione S-transferase U8 IPR010987 (Glutathione S-transferase, C-terminal-like), IPR012336 (Thioredoxin-like fold) GO:0005515 (protein binding)
6	Niben101Scf06277g05013.1	57346	54060	52034	73493	70635	65345	50446	71709	53569	50142	41563	41843	60531	56304	62270	46543	47751	49061	49757	49221	52526	26645	28037	26626	52853	47706	42245	48041	45696	45707	53676	49558	54556	60989	82187	70694	135670	111680	114950	81186	79236	84157	100840	101450	120760	sp|D3RX66|PSB_FERPA **** Proteasome subunit beta IPR001353 (Proteasome, subunit alpha/beta), IPR029055 (Nucleophile aminohydrolases, N-terminal) GO:0004175 (endopeptidase activity), GO:0004298 (threonine-type endopeptidase activity), GO:0005839 (proteasome core complex), GO:0051603 (proteolysis involved in cellular protein catabolic process)
6	Niben101Scf01445g00016.1	288290	288430	283640	289760	292960	281740	255450	253850	259230	261310	246770	252090	271680	227930	238350	274650	243760	279290	198300	200220	196470	177280	197860	252880	191380	212060	202850	419590	406800	396260	468810	457650	479760	433200	445690	518070	1097300	936990	1035600	710300	730250	703600	728540	801940	859950	sp|P43157|CYSP_SCHJA *-** Cathepsin B-like cysteine proteinase IPR013128 (Peptidase C1A), IPR025660 (Cysteine peptidase, histidine active site), IPR025661 (Cysteine peptidase, asparagine active site) GO:0006508 (proteolysis), GO:0008234 (cysteine-type peptidase activity)
6	Niben101Scf02468g10004.1	37819	33933	28879	21400	37309	23316	30055	27415	28820	37016	34900	36197	31092	39034	39619	33254	31930	33358	33960	33946	31962	25519	35342	28551	31718	29962	6625.9	44465	44581	38300	12847	49343	44040	47364	44798	39683	66104	71075	72339	64252	55594	61050	67222	61515	70511	AT2G26230.1 **** uricase / urate oxidase / nodulin 35, putative LENGTH=309 IPR002042 (Uricase) GO:0004846 (urate oxidase activity), GO:0006144 (purine nucleobase metabolic process), GO:0055114 (oxidation-reduction process)
6	Niben101Scf11232g01012.1	91559	98666	34978	43745	97175	110050	114050	62175	67700	169960	210190	89057	181510	95342	57267	118040	127040	156510	79464	122900	67060	116490	102570	97145	96792	73432	79916	150490	143500	79719	213540	182650	149260	196070	254790	192950	310400	352880	493200	219360	241140	263280	267710	315990	561030	gb|ABB69784.1| **** beta-glucan-binding protein 4 [Medicago truncatula] IPR005200 (Endo-1,3(4)-beta-glucanase) GO:0016998 (cell wall macromolecule catabolic process), GO:0052861 (glucan endo-1,3-beta-glucanase activity, C-3 substituted reducing group), GO:0052862 (glucan endo-1,4-beta-glucanase activity, C-3 substituted reducing group)
6	Niben101Scf00972g01011.1	26037	26989	31609	27667	38355	38669	26282	34621	34703	41462	39808	34947	28769	36661	38124	37748	42784	34854	28652	31047	31112	25255	34323	30554	34872	13064	27738	39062	37627	38280	38182	39657	39014	39331	46244	54029	62522	54951	62621	47741	48254	42613	43017	51067	65751	sp|Q5R891|LNP_PONAB ***- Protein lunapark IPR019273 (Domain of unknown function DUF2296)
6	Niben101Scf00123g04003.1	414480	263390	405690	468530	468140	502020	566450	607700	587910	482190	241960	386410	268920	441820	442370	253810	258810	270900	227120	341830	300640	375150	359720	356840	423050	378910	398200	396910	500000	500730	397770	399570	582420	615420	742430	749330	1179100	927260	1051300	768630	804220	817870	751480	712460	806810	sp|P25076|CY11_SOLTU **** Cytochrome c1-1, heme protein, mitochondrial IPR002326 (Cytochrome c1) GO:0005506 (iron ion binding), GO:0009055 (electron carrier activity), GO:0020037 (heme binding)
6	Niben101Scf20077g00016.1	53890	48874	36117	47119	70145	72772	98752	100150	58142	62286	43202	67219	49254	32036	44977	24588	42221	42832	63499	41287	52272	51894	42715	39621	44025	45903	64744	45701	42053	53117	77497	64540	57055	48168	77114	81275	123720	118680	83034	81247	92151	63693	134470	145220	86830	sp|Q55E35|SPCS2_DICDI **** Signal peptidase complex subunit 2 IPR009582 (Signal peptidase complex subunit 2) GO:0005787 (signal peptidase complex), GO:0006465 (signal peptide processing), GO:0008233 (peptidase activity), GO:0016021 (integral component of membrane)
6	Niben101Scf03088g03004.1	20164	42913	38491	45708	10917	51114	39883	24001	16429	40515	37320	34822	36579	56963	71115	68590	38126	40493	35427	94015	103430	17933	41625	18137	103840	35974	46272	84021	16714	21556	105780	22206	95532	40005	31604	37691	30387	15428	33364	66553	238740	273830	176340	67038	134440	sp|Q9Y580|RBM7_HUMAN --** RNA-binding protein 7 IPR012677 (Nucleotide-binding alpha-beta plait domain) GO:0000166 (nucleotide binding), GO:0003676 (nucleic acid binding)
6	Niben101Scf01400g00014.1	48090	31312	56470	30906	43641	39526	134050	55455	60616	31247	70457	14013	30607	22819	40440	22745	26358	11150	26039	21864	17721	35326	24899	26419	19239	19543	31782	47796	38470	35032	23961	39322	33485	26144	18978	37551	101950	106330	95219	38088	62852	66973	152500	133990	203300	sp|E3SU11|ALL13_OLEEU ***- Thaumatin-like protein IPR001938 (Thaumatin)
6	Niben101Scf06750g00014.1	11222	33555	62880	66351	35487	58681	33477	56830	80824	29902	15829	24307	18610	33757	23283	36259	18444	33973	21065	37959	14653	59945	22395	72737	16427	50342	69279	25549	26251	107300	109780	58975	55414	109470	147440	103380	188610	172250	165230	209340	26688	160260	201980	194660	13715	sp|Q9CAR3|KINGL_ARATH ***- SNF1-related protein kinase regulatory subunit gamma-1-like IPR000644 (CBS domain)
6	Niben101Scf13697g00001.1	42174	24625	22675	37735	25480	46626	38723	46885	25016	26447	23285	27509	3396.2	16013	21752	30246	35088	14523	9514.9	6698.8	38363	14314	48807	50548	39050	46480	26862	67757	8817.3	12187	80314	84468	82088	82248	44091	27725	235770	276670	28085	227490	254840	228940	215310	244110	298550	sp|Q501E6|FLOT1_ARATH ***- Flotillin-like protein 1 IPR001107 (Band 7 protein)
6	Niben101Scf01824g00013.1	14088	10943	15527	21066	14719	58293	36773	62358	44970	18256	9325.7	11374	10891	4217.9	8416.4	6786.9	7807.6	46667	65500	19348	9901.2	19393	22168	21544	17069	17864	24403	149610	168010	174790	231970	215230	235940	124600	102000	80877	718290	616410	621530	636140	637360	639500	479780	468860	473830	sp|P81370|TLP_ACTDE ***- Thaumatin-like protein IPR001938 (Thaumatin)
6	Niben101Scf05883g02007.1	5051	4147.8	4361.1	1142.3	4076.5	5780.3	5749.9	7199.2	4807.1	13883	14570	11257	12465	5673.5	1002.7	8503.6	8930.3	7419.7	2880.1	2238.9	6894.4	5703.4	3272.7	5316	2602.9	1087.6	1441.2	4667.2	4283.6	1830.1	4686.3	3743.1	3587.7	4481.9	7209.7	7275	40654	27484	31844	20760	17790	17901	24084	20059	20940	sp|Q01440|GTR1_LEIDO **** Membrane transporter D1 IPR005828 (General substrate transporter), IPR020846 (Major facilitator superfamily domain) GO:0005215 (transporter activity), GO:0016020 (membrane), GO:0016021 (integral component of membrane), GO:0022857 (transmembrane transporter activity), GO:0022891 (substrate-specific transmembrane transporter activity), GO:0055085 (transmembrane transport)
6	Niben101Scf03023g02008.1	16904	10685	20746	13052	16352	16495	21893	24026	17870	12363	8408.4	13053	12670	12713	11799	17415	15953	13626	16797	12935	13493	15697	3665.2	20435	13322	12404	11632	12211	16454	13358	24116	22660	15076	19248	28010	22192	33029	29493	33537	25659	31432	24610	25572	28867	25166	sp|Q13442|HAP28_HUMAN *-*- 28 kDa heat- and acid-stable phosphoprotein IPR019380 (Casein kinase substrate, phosphoprotein PP28)
[truncated: 727 more rows]
