# Supplementary material for: SWATH-MS based quantitative proteomics analysis reveals novel proteins involved in PAMP triggered immunity against potato late blight pathogen Phytophthora infestans
Source: Front Plant Sci. 2022 Nov 18;13:1036637. doi: 10.3389/fpls.2022.1036637 (PMC9715588; doi:10.3389/fpls.2022.1036637)
Supplement: Supplementary file 2 [file Table_2.xlsx]

## Sheet: Sheet1
Table S2 Biological process enrichment in cluster 7
GO Name	GO ID	P value	Enrichment Score	HitsGenes	Genes Of Selected Set In GO term
catabolic process	GO:0009056	8.93e-09	2.29173	52	Niben101Scf13411g05026.1,Niben101Scf08196g01001.1,Niben101Scf01052g06004.1,Niben101Scf06394g00009.1,Niben101Scf04973g02006.1,Niben101Scf06080g00003.1,Niben101Scf02085g26009.1,Niben101Scf02395g03005.1,Niben101Scf06171g02014.1,Niben101Scf12528g00009.1,Niben101Scf02384g00024.1,Niben101Scf04174g01008.1,Niben101Scf02581g03002.1,Niben101Scf06958g02005.1,Niben101Scf09470g01004.1,Niben101Scf07005g00008.1…
small molecule metabolic process	GO:0044281	2.79e-08	2.01771	62	Niben101Scf13411g05026.1,Niben101Scf24238g00004.1,Niben101Scf02296g00016.1,Niben101Scf06394g00009.1,Niben101Scf03450g00015.1,Niben101Scf14679g00002.1,Niben101Scf03191g05007.1,Niben101Scf22099g00006.1,Niben101Scf01005g04004.1,Niben101Scf02395g03005.1,Niben101Scf08721g01033.1,Niben101Scf10322g01010.1,Niben101Scf03265g00012.1,Niben101Scf02581g03002.1,Niben101Scf05972g02008.1,Niben101Scf11922g00016.1…
secondary metabolic process	GO:0019748	3.5e-08	3.29974	28	Niben101Scf08196g01001.1,Niben101Scf06394g00009.1,Niben101Scf14679g00002.1,Niben101Scf01239g02002.1,Niben101Scf06080g00003.1,Niben101Scf22099g00006.1,Niben101Scf02395g03005.1,Niben101Scf12528g00009.1,Niben101Scf04174g01008.1,Niben101Scf02581g03002.1,Niben101Scf06958g02005.1,Niben101Scf09470g01004.1,Niben101Scf12738g00010.1,Niben101Scf00700g09004.1,Niben101Scf07736g03001.1,Niben101Scf01037g10003.1…
response to stress	GO:0006950	1.82e-06	1.57104	87	Niben101Scf05283g00016.1,Niben101Scf06394g00009.1,Niben101Scf20324g00001.1,Niben101Scf14679g00002.1,Niben101Scf02852g02007.1,Niben101Scf03191g05007.1,Niben101Scf22099g00006.1,Niben101Scf07533g03002.1,Niben101Scf02921g00003.1,Niben101Scf02085g26009.1,Niben101Scf02395g03005.1,Niben101Scf03035g02006.1,Niben101Scf01184g08003.1,Niben101Scf07261g01014.1,Niben101Scf12528g00009.1,Niben101Scf10322g01010.1…
response to chemical	GO:0042221	6.04e-05	1.47499	81	Niben101Scf13411g05026.1,Niben101Scf08196g01001.1,Niben101Scf02593g00002.1,Niben101Scf05283g00016.1,Niben101Scf06394g00009.1,Niben101Scf20324g00001.1,Niben101Scf03450g00015.1,Niben101Scf14679g00002.1,Niben101Scf06080g00003.1,Niben101Scf02852g02007.1,Niben101Scf03191g05007.1,Niben101Scf22099g00006.1,Niben101Scf02921g00003.1,Niben101Scf02395g03005.1,Niben101Scf08721g01033.1,Niben101Scf03035g02006.1…
ATP metabolic process	GO:0046034	8.56e-05	3.82795	12	Niben101Scf13411g05026.1,Niben101Scf00986g02007.1,Niben101Scf04436g13014.1,Niben101Scf00302g01002.1,Niben101Scf10650g02016.1,Niben101Scf00258g02006.1,Niben101Scf00551g06004.1,Niben101Scf03580g01006.1,Niben101Scf01718g05001.1,Niben101Scf00155g04014.1,Niben101Scf06848g08015.1,Niben101Scf00974g00015.1,
NADP metabolic process	GO:0006739	0.000111	10.7183	5	Niben101Scf02296g00016.1,Niben101Scf00302g01002.1,Niben101Scf03580g01006.1,Niben101Scf08127g08009.1,Niben101Scf00986g01010.1,
protein folding	GO:0006457	0.00013	4.30452	10	Niben101Scf01890g01005.1,Niben101Scf04886g05003.1,Niben101Scf03390g09001.1,Niben101Scf08447g01002.1,Niben101Scf02030g04003.1,Niben101Scf08590g00005.1,Niben101Scf03777g00002.1,Niben101Scf03138g01010.1,Niben101Scf01596g11007.1,Niben101Scf10205g00001.1,
immune response	GO:0006955	0.00816959	1.53022	34	Niben101Scf03191g05007.1,Niben101Scf02085g26009.1,Niben101Scf02395g03005.1,Niben101Scf03035g02006.1,Niben101Scf07261g01014.1,Niben101Scf12528g00009.1,Niben101Scf10322g01010.1,Niben101Scf02384g00024.1,Niben101Scf02240g06018.1,Niben101Scf04886g05003.1,Niben101Scf09044g01015.1,Niben101Scf32522g00006.1,Niben101Scf02093g00004.1,Niben101Scf03390g09001.1,Niben101Scf01434g03001.1,Niben101Scf01579g01032.1…
macromolecule localization	GO:0033036	0.0109147	1.69886	22	Niben101Scf00819g06008.1,Niben101Scf15792g00002.1,Niben101Scf04973g02006.1,Niben101Scf07024g00009.1,Niben101Scf07261g01014.1,Niben101Scf12528g00009.1,Niben101Scf03373g04012.1,Niben101Scf01249g03026.1,Niben101Scf02581g03002.1,Niben101Scf06822g01006.1,Niben101Scf32522g00006.1,Niben101Scf02093g00004.1,Niben101Scf03337g06015.1,Niben101Scf06583g03008.1,Niben101Scf03804g09002.1,Niben101Scf01171g03019.1…
cellular response to stimulus	GO:0051716	0.0117275	1.33502	56	Niben101Scf05283g00016.1,Niben101Scf06394g00009.1,Niben101Scf14679g00002.1,Niben101Scf02852g02007.1,Niben101Scf03191g05007.1,Niben101Scf07533g03002.1,Niben101Scf02085g26009.1,Niben101Scf02395g03005.1,Niben101Scf08721g01033.1,Niben101Scf07024g00009.1,Niben101Scf03035g02006.1,Niben101Scf07261g01014.1,Niben101Scf12528g00009.1,Niben101Scf00332g04004.1,Niben101Scf06109g00001.1,Niben101Scf04174g01008.1…
cellular metabolic process	GO:0044237	0.0133832	1.1373	138	Niben101Scf13411g05026.1,Niben101Scf08196g01001.1,Niben101Scf02593g00002.1,Niben101Scf15792g00002.1,Niben101Scf01052g06004.1,Niben101Scf24238g00004.1,Niben101Scf02296g00016.1,Niben101Scf06394g00009.1,Niben101Scf20324g00001.1,Niben101Scf00986g02007.1,Niben101Scf03450g00015.1,Niben101Scf14679g00002.1,Niben101Scf04973g02006.1,Niben101Scf04288g01012.1,Niben101Scf01239g02002.1,Niben101Scf06080g00003.1…
response to biotic stimulus	GO:0009607	0.0167932	1.42576	37	Niben101Scf06394g00009.1,Niben101Scf03191g05007.1,Niben101Scf01005g04004.1,Niben101Scf02085g26009.1,Niben101Scf02395g03005.1,Niben101Scf03035g02006.1,Niben101Scf07261g01014.1,Niben101Scf12528g00009.1,Niben101Scf10322g01010.1,Niben101Scf02384g00024.1,Niben101Scf02240g06018.1,Niben101Scf04886g05003.1,Niben101Scf09044g01015.1,Niben101Scf32522g00006.1,Niben101Scf02467g01003.1,Niben101Scf02093g00004.1…
establishment of localization	GO:0051234	0.0237302	1.38324	38	Niben101Scf00819g06008.1,Niben101Scf04973g02006.1,Niben101Scf01005g04004.1,Niben101Scf02386g01004.1,Niben101Scf03113g00001.1,Niben101Scf07024g00009.1,Niben101Scf03373g04012.1,Niben101Scf04703g00002.1,Niben101Scf01249g03026.1,Niben101Scf09552g01014.1,Niben101Scf02240g06018.1,Niben101Scf02581g03002.1,Niben101Scf01209g00014.1,Niben101Scf06822g01006.1,Niben101Scf32522g00006.1,Niben101Scf02093g00004.1…
cellular localization	GO:0051641	0.0483227	1.49331	20	Niben101Scf00819g06008.1,Niben101Scf04973g02006.1,Niben101Scf02386g01004.1,Niben101Scf03113g00001.1,Niben101Scf07261g01014.1,Niben101Scf12528g00009.1,Niben101Scf04703g00002.1,Niben101Scf01249g03026.1,Niben101Scf09552g01014.1,Niben101Scf06822g01006.1,Niben101Scf02093g00004.1,Niben101Scf06078g02029.1,Niben101Scf03337g06015.1,Niben101Scf07984g02016.1,Niben101Scf03804g09002.1,Niben101Scf10213g00017.1…
