# Supplementary material for: SWATH-MS based quantitative proteomics analysis reveals novel proteins involved in PAMP triggered immunity against potato late blight pathogen Phytophthora infestans
Source: Front Plant Sci. 2022 Nov 18;13:1036637. doi: 10.3389/fpls.2022.1036637 (PMC9715588; doi:10.3389/fpls.2022.1036637)
Supplement: Supplementary file 3 [file Table_3.xlsx]

## Sheet: Sheet1
Table S3 Primers used in this study
Primer name	Sequence	Note
pTRV:MPT3-F	tgagtaaggttaccgaattcTACAGTGCTCAGGGTGCATG	for virus induced gene silencing
pTRV:MPT3-R	gtgagctcggtaccggatccCGTCCCCAAAGAGGAACCAA	for virus induced gene silencing
pTRV:VAMP714-F	tgagtaaggttaccgaattcCGGGCTCAGCTTCCTTTGTA	for virus induced gene silencing
pTRV:VAMP714-R	gtgagctcggtaccggatccGGCGCTTTGACTGTTTCCTG	for virus induced gene silencing
pTRV:LysoPL2-F	tgagtaaggttaccgaattcTGTGCAAGCTGCCATCCTTA	for virus induced gene silencing
pTRV:LysoPL2-R	gtgagctcggtaccggatccTCACCCTCGAACACTTGCTC	for virus induced gene silencing
pTRV:APX1-F	tgagtaaggttaccgaattcGAGCCCATCAAGGAGCAGTT	for virus induced gene silencing
pTRV:APX1-R	gtgagctcggtaccggatccGTCCCTCGAAACCAGAACGT	for virus induced gene silencing
pTRV:HSP70-2-F	tgagtaaggttaccgaattcCCGAAACAGCCTGGAGACTT	for virus induced gene silencing
pTRV:HSP70-2-R	gtgagctcggtaccggatccTCGTTGGATTCCTCACTGGC	for virus induced gene silencing
pTRV:FKBP15-1-F	tgagtaaggttaccgaattcTGAACTTAAGGCTCACAAGGGT	for virus induced gene silencing
pTRV:FKBP15-1-R	gtgagctcggtaccggatccAGCACCACCTGGGATCTTTG	for virus induced gene silencing
qRT:Pti5-F	CCTCCAAGTTTGAGCTCGGATAGT	Use for qRT-PCR
qRT:Pti5-R	CCAAGAAATTCTCCATGCACTCTGTC	Use for qRT-PCR
qRT:Acre31-F	AATTCGGCCATCGTGATCTTGGTC	Use for qRT-PCR
qRT:Acre31-R	GAGAAACTGGGATTGCCTGAAGGA	Use for qRT-PCR
qRT:NbWRKY8-F	AACAATGGTGCCAATAATGC	Use for qRT-PCR
qRT:NbWRKY8-R	TGCATATCCTGAGAAACCATT	Use for qRT-PCR
qRT:Actin-F	CAGAAAGGACCTCTACGGTAACAT	Use for qRT-PCR
qRT:Actin-R	TCTGTGGACGATGGACGGAC	Use for qRT-PCR
qRT:MPT3-F	CGTTGTCCACCAACAAGAGC	Use for qRT-PCR
qRT:MPT3-R	CCCCTGAAGAAGCCCTTAGC	Use for qRT-PCR
qRT:VAMP714-F	GGACAGGTAGTTCTGATTTCCGT	Use for qRT-PCR
qRT:VAMP714-R	AACCGCATACAGTATCGCCA	Use for qRT-PCR
qRT:LysoPL2-F	GACGCCAACTTCATGTGTAAAAT	Use for qRT-PCR
qRT:LysoPL2-R	TTTTCCGGTGGCTTTGAACG	Use for qRT-PCR
qRT:APX1-F	GGTTCAAGGCTGAGCAAGGA	Use for qRT-PCR
qRT:APX1-R	GGTGGCTCTGTCTTGTCCTC	Use for qRT-PCR
qRT:HSP70-2-F	GCAGAGACAGAGACTCGCAA	Use for qRT-PCR
qRT:HSP70-2-R	CACCAGCCATAGCTCGTAGG	Use for qRT-PCR
qRT:FKBP15-1-F	GACTGTAATGCTTTTCAAGCCA	Use for qRT-PCR
qRT:FKBP15-1-R	ACTTGACCACTTCCAAGCTCA	Use for qRT-PCR
